# Supplementary material
Source: PubMed Central journal article supplement (PMC5064217)
Supplement: MCB.00402-16_zmb999101333so1.pdf [file MCB.00402-16_zmb999101333so1.pdf]

**TABLE S1** Plasmids used in this study.

| Plasmid           | Description                                                                         | Source/Reference |
|-------------------|-------------------------------------------------------------------------------------|------------------|
| pRS315 (pAC3)     | <i>LEU2, CEN, amp<sup>r</sup></i>                                                   | (2)              |
| pRS316 (pAC4)     | <i>URA3, CEN, amp<sup>r</sup></i>                                                   | (2)              |
| pAC636            | <i>NAB2, URA3, CEN, amp<sup>r</sup></i>                                             | (3)              |
| pAC717            | <i>NAB2, LEU2, CEN, amp<sup>r</sup></i>                                             | (3)              |
| pAC1152           | <i>nab2-ΔN, LEU2, CEN, amp<sup>r</sup></i>                                          | (4)              |
| pSW3298 (pAC2307) | <i>nab2-C437S, LEU2, CEN, amp<sup>r</sup></i>                                       | (5)              |
| pAC2203           | <i>nab2-C&gt;A<sub>5-7</sub>, LEU2, CEN, amp<sup>r</sup></i>                        | (6)              |
| pAC2938           | <i>MUD2, URA3, CEN, amp<sup>r</sup></i>                                             | This study       |
| pAC3112           | <i>MUD2-Myc, URA3, CEN, amp<sup>r</sup></i>                                         | This study       |
| pAC3160           | <i>mud2-Myc R130A, R131A, R133A, R139A, R140A, R142A URA3, CEN, amp<sup>r</sup></i> | This study       |
| pAC3147           | <i>mud2-Myc V210A, I211A, F266A, URA3, CEN, amp<sup>r</sup></i>                     | This study       |
| pAC3148           | <i>mud2-Myc N319A, F373A, F375A, URA3, CEN, amp<sup>r</sup></i>                     | This study       |
| pAC3150           | <i>mud2-Myc L425A, L427A, N480A, Y482A, K484A, URA3, CEN, amp<sup>r</sup></i>       | This study       |
| pAC1100           | <i>NAB2-Myc URA3, CEN, amp<sup>r</sup></i>                                          | (3)              |
| pAC1276           | <i>nab2-ΔN-Myc URA3, CEN, amp<sup>r</sup></i>                                       | This study       |
| pAC1397           | <i>nab2-ΔZnF5-7-Myc URA3, CEN, amp<sup>r</sup></i>                                  | This study       |

TABLE S2 Yeast strains used in this study.

| Strain                                                                     | Description                                                                                                                            | Source/Reference |
|----------------------------------------------------------------------------|----------------------------------------------------------------------------------------------------------------------------------------|------------------|
| W303 (ACY233)                                                              | <i>MAT<math>\alpha</math> his3 leu2 ura3 trp1</i>                                                                                      | (7)              |
| BY4741 (ACY402)                                                            | <i>MAT<math>\alpha</math> ura3 met15 leu2 his3</i>                                                                                     | (8)              |
| ACY1444                                                                    | <i>MAT<math>\alpha</math> his3 leu1 lys2 ura3 mfa1::PMFA1 SpHis5 can1</i>                                                              | (9)              |
| <i>nab2-C<math>\Delta</math><sub>5-7</sub></i> (ACY1837)                   | <i>MAT<math>\alpha</math> his3 leu1 lys2 ura3 mfa1::PMFA1 can1 nab2-C<math>\Delta</math><sub>5-7</sub>::NAT (pAC636)</i>               | This study       |
| <i>nab2-<math>\Delta</math>N</i> (ACY1847)                                 | <i>MAT<math>\alpha</math> his3 leu1 lys2 ura3 mfa1::PMFA1 can1 nab2-<math>\Delta</math>N::NAT (pAC636)</i>                             | This study       |
| <i>prp2-1</i> (ACY2252)                                                    | <i>MAT<math>\alpha</math> ade1 ade2 ura4 his7 tyr1 lys2 prp2-1</i>                                                                     | (10)             |
| <i><math>\Delta</math>mud2</i> (ACY2270)                                   | <i>MAT<math>\alpha</math> ura3 met15 leu2 his3 <math>\Delta</math>mud2::KANMX</i>                                                      | Open Biosystems  |
| <i><math>\Delta</math>mlp1<math>\Delta</math>mlp2</i> (ACY959)             | <i>MAT<math>\alpha</math> leu2 ura3 trp1 <math>\Delta</math>mlp1::KANMX <math>\Delta</math>mlp2::HIS3</i>                              | This study       |
| <i>nab2-C437S</i> (ACY2202)                                                | <i>MAT<math>\alpha</math> ura3 met15 leu2 his3 nab2-C437S::NATMX</i>                                                                   | This study       |
| <i><math>\Delta</math>nab2</i> (ACY427)                                    | <i>MAT<math>\alpha</math> leu2 ura3 <math>\Delta</math>nab2::HIS3 (pAC636)</i>                                                         | (3)              |
| <i><math>\Delta</math>nab2<math>\Delta</math>cus2</i> (ACY2136)            | <i>MAT<math>\alpha</math> leu2 ura3 <math>\Delta</math>nab2::HIS3 (pAC636)<br/><math>\Delta</math>cus2::KANMX</i>                      | This study       |
| <i><math>\Delta</math>nab2<math>\Delta</math>mud2</i> (ACY2138)            | <i>MAT<math>\alpha</math> leu2 ura3 <math>\Delta</math>nab2::HIS3 (pAC636)<br/><math>\Delta</math>mud2::KANMX</i>                      | This study       |
| <i>SRP1-TAP</i> (ACY1073)                                                  | <i>MAT<math>\alpha</math> ura3 met15 leu2 SRP1-TAP::HIS3</i>                                                                           | Open Biosystems  |
| <i>PUB1-TAP</i> (ACY776)                                                   | <i>MAT<math>\alpha</math> ura3 met15 leu2 PUB1-TAP::HIS3</i>                                                                           | Open Biosystems  |
| <i>MUD2-TAP</i> (ACY2173)                                                  | <i>MAT<math>\alpha</math> ura3 met15 leu2 MUD2-TAP::HIS3</i>                                                                           | Open Biosystems  |
| <i>MSL5-TAP</i> (ACY1127)                                                  | <i>MAT<math>\alpha</math> ura3 met15 leu2 MSL5-TAP::HIS3</i>                                                                           | Open Biosystems  |
| <i><math>\Delta</math>rrp6</i> (ACY1641)                                   | <i>MAT<math>\alpha</math> his3 leu2 ura3 met15 <math>\Delta</math>rrp6::KANMX</i>                                                      | Open Biosystems  |
| <i><math>\Delta</math>trf4</i> (ACY2154)                                   | <i>MAT<math>\alpha</math> his3 leu2 ura3 trp1 <math>\Delta</math>trf4::NATMX</i>                                                       | This study       |
| <i>nab2-C437S <math>\Delta</math>rrp6</i> (ACY2271)                        | <i>MAT<math>\alpha</math> his3 leu2 ura3 met15 nab2-C437S::NATMX<br/><math>\Delta</math>rrp6::KANMX</i>                                | This study       |
| <i>nab2-C437S <math>\Delta</math>trf4</i> (ACY2272)                        | <i>MAT<math>\alpha</math> his3 leu2 ura3 met15 nab2-C437S::NATMX<br/><math>\Delta</math>trf4::KANMX</i>                                | This study       |
| <i>nab2-C437S <math>\Delta</math>mud2</i> (ACY2273)                        | <i>MAT<math>\alpha</math> his3 leu2 ura3 met15 nab2-C437S::NATMX<br/><math>\Delta</math>mud2::KANMX</i>                                | This study       |
| <i><math>\Delta</math>trf4<math>\Delta</math>mud2</i> (ACY2274)            | <i>MAT<math>\alpha</math> his3 leu2 ura3 trp1<br/><math>\Delta</math>trf4::NATMX <math>\Delta</math>mud2::KANMX</i>                    | This study       |
| <i><math>\Delta</math>rrp6<math>\Delta</math>mud2</i> (ACY2275)            | <i>MAT<math>\alpha</math> his3 leu2 ura3 met15 <math>\Delta</math>rrp6::KANMX<br/><math>\Delta</math>mud2::NATMX</i>                   | This study       |
| <i>nab2-C437S <math>\Delta</math>mud2<math>\Delta</math>trf4</i> (ACY2320) | <i>MAT<math>\alpha</math> his3 leu2 ura3 met15 nab2-C437S::NATMX<br/><math>\Delta</math>mud2::KANMX <math>\Delta</math>trf4::HPHMX</i> | This study       |
| <i>nab2-C437S <math>\Delta</math>mud2<math>\Delta</math>rrp6</i> (ACY2313) | <i>MAT<math>\alpha</math> his3 leu2 ura3 met15 nab2-C437S::NATMX<br/><math>\Delta</math>rrp6::KANMX <math>\Delta</math>mud2::HPHMX</i> | This study       |

TABLE S3 Splicing array data.

| ORF Name  | NAME          | <i>nab2</i> -<br>C>A <sub>5-7</sub><br>16°C<br>Exon | <i>nab2</i> -<br>C>A <sub>5-7</sub><br>30°C<br>Exon | <i>nab2</i> -<br>ΔN<br>16°C<br>Exon | <i>nab2</i> -<br>ΔN<br>30°C<br>Exon | <i>nab2</i> -<br>C>A <sub>5-7</sub><br>16°C<br>Intron | <i>nab2</i> -<br>C>A <sub>5-7</sub><br>30°C<br>Intron | <i>nab2</i> -<br>ΔN<br>16°C<br>Intron | <i>nab2</i> -<br>ΔN<br>30°C<br>Intron | <i>nab2</i> -<br>C>A <sub>5-7</sub><br>16°C<br>Junct. | <i>nab2</i> -<br>C>A <sub>5-7</sub><br>30°C<br>Junct. | <i>nab2</i> -<br>ΔN<br>16°C<br>Junct. | <i>nab2</i> -<br>ΔN<br>30°C<br>Junct. |
|-----------|---------------|-----------------------------------------------------|-----------------------------------------------------|-------------------------------------|-------------------------------------|-------------------------------------------------------|-------------------------------------------------------|---------------------------------------|---------------------------------------|-------------------------------------------------------|-------------------------------------------------------|---------------------------------------|---------------------------------------|
| EWEIGHT   |               | 1.000                                               | 1.000                                               | 1.000                               | 1.000                               | 1.000                                                 | 1.000                                                 | 1.000                                 | 1.000                                 | 1.000                                                 | 1.000                                                 | 1.000                                 | 1.000                                 |
| YML067C   | <i>ERV41</i>  | -0.004                                              | -0.346                                              | -0.020                              | -0.374                              | -0.032                                                | -0.043                                                | 0.046                                 | 0.177                                 | -0.104                                                | -0.531                                                | 0.104                                 | -0.516                                |
| YDL075W   | <i>RPL31A</i> | -0.067                                              | -0.031                                              | 0.016                               | -0.179                              | 0.353                                                 | 0.025                                                 | 0.069                                 | -0.042                                | -0.078                                                | -0.093                                                | 0.027                                 | 0.053                                 |
| YJL001W   | <i>PRE3</i>   | -0.109                                              | -0.305                                              | 0.216                               | 0.430                               | -0.035                                                | 0.021                                                 | -0.091                                | 0.444                                 | 0.108                                                 | -0.534                                                | 0.351                                 | 0.247                                 |
| YLR048W   | <i>RPS0B</i>  | -0.043                                              | 0.085                                               | -0.006                              | -0.008                              | 0.387                                                 | 0.259                                                 | 0.572                                 | 0.603                                 | 0.021                                                 | 0.306                                                 | 0.070                                 | 0.020                                 |
| YIL069C   | <i>RPS24B</i> | 0.012                                               | -0.119                                              | -0.104                              | -0.046                              | 0.258                                                 | -0.060                                                | 0.234                                 | 0.150                                 | 0.019                                                 | -0.189                                                | -0.088                                | 0.010                                 |
| YJL191W   | <i>RPS14B</i> | -0.106                                              | -0.567                                              | 0.220                               | 0.059                               | 0.416                                                 | 0.140                                                 | 0.702                                 | 0.818                                 | -0.110                                                | -0.657                                                | 0.115                                 | -0.309                                |
| YER133W   | <i>GLC7</i>   | -0.274                                              | 0.110                                               | 0.051                               | 0.592                               | 0.045                                                 | -0.042                                                | -0.031                                | -0.034                                | -0.102                                                | 0.117                                                 | 0.091                                 | 0.160                                 |
| YER117W   | <i>RPL23B</i> | -0.143                                              | -0.273                                              | 0.103                               | -0.133                              | 0.205                                                 | -0.229                                                | 0.007                                 | -0.110                                | 0.086                                                 | -0.049                                                | -0.085                                | -0.180                                |
| YOR096W   | <i>RPS7A</i>  | 0.005                                               | -0.374                                              | -0.348                              | -0.077                              | 0.381                                                 | -0.008                                                | 0.021                                 | 0.461                                 | -0.137                                                | -0.251                                                | -0.117                                | -0.054                                |
| YLR367W   | <i>RPS22B</i> | -1.146                                              | -1.276                                              | -0.841                              | -1.937                              | 0.242                                                 | 0.067                                                 | 0.423                                 | 0.118                                 | -1.097                                                | -1.055                                                | -1.476                                | -2.222                                |
| YLR388W   | <i>RPS29A</i> | -0.524                                              | -0.696                                              | -0.448                              | -0.300                              | 0.088                                                 | -0.148                                                | 0.051                                 | 0.041                                 | -0.383                                                | -0.633                                                | -0.130                                | -0.537                                |
| YDR064W   | <i>RPS13</i>  | -0.207                                              | -0.220                                              | -0.089                              | -0.224                              | 0.039                                                 | -0.172                                                | -0.095                                | 0.777                                 | -0.078                                                | -0.222                                                | -0.510                                | -0.258                                |
| YBR189W   | <i>RPS9B</i>  | -0.080                                              | 0.043                                               | -0.280                              | -0.254                              | 0.204                                                 | -0.287                                                | 0.232                                 | 0.340                                 | -0.335                                                | -0.088                                                | -0.305                                | -0.315                                |
| YIL148W   | <i>RPL40A</i> | -0.108                                              | -0.077                                              | 0.471                               | 0.004                               | 0.064                                                 | -0.126                                                | 0.266                                 | 0.239                                 | 0.067                                                 | -0.146                                                | 0.287                                 | -0.067                                |
| YBL092W   | <i>RPL32</i>  | -0.094                                              | -0.059                                              | -0.023                              | -0.028                              | 0.508                                                 | 0.490                                                 | 0.449                                 | 0.479                                 | 0.105                                                 | 0.005                                                 | -0.113                                | -0.202                                |
| YMR143W   | <i>RPS16A</i> | -0.282                                              | -0.557                                              | -0.337                              | -0.357                              | 0.250                                                 | 0.122                                                 | 0.169                                 | 0.166                                 | -0.134                                                | -0.211                                                | -0.041                                | -0.166                                |
| YMR142C   | <i>RPL13B</i> | -0.196                                              | -0.363                                              | -0.257                              | -0.108                              | 0.082                                                 | -0.111                                                | -0.013                                | 0.206                                 | -0.176                                                | -0.357                                                | -0.207                                | -0.118                                |
| YLR333C   | <i>RPS25B</i> | -0.067                                              | -0.555                                              | -0.654                              | -0.672                              | 0.133                                                 | 0.026                                                 | 0.662                                 | 0.237                                 | 0.056                                                 | -0.133                                                | -0.461                                | -0.498                                |
| YPR043W   | <i>RPL43A</i> | -0.035                                              | -0.125                                              | -0.174                              | -0.134                              | 0.231                                                 | -0.041                                                | 0.215                                 | 0.354                                 | 0.025                                                 | -0.018                                                | -0.117                                | -0.035                                |
| YML026C   | <i>RPS18B</i> | 0.043                                               | -0.242                                              | -0.332                              | 0.200                               | 0.339                                                 | 0.200                                                 | 0.477                                 | 0.664                                 | 0.094                                                 | 0.004                                                 | -0.041                                | -0.221                                |
| YDL082W   | <i>RPL13A</i> | -0.134                                              | -0.173                                              | -0.126                              | -0.206                              | 0.317                                                 | 0.114                                                 | 0.116                                 | 0.303                                 | 0.075                                                 | 0.058                                                 | -0.090                                | -0.301                                |
| YGR214W   | <i>RPS0A</i>  | 0.465                                               | 0.554                                               | 0.078                               | 0.147                               | 0.132                                                 | -0.037                                                | 0.084                                 | 0.269                                 | 0.438                                                 | 0.429                                                 | 0.043                                 | -0.023                                |
| YMR230W   | <i>RPS10B</i> | -0.096                                              | -0.445                                              | -0.122                              | -0.332                              | 0.100                                                 | -0.088                                                | 0.299                                 | 0.516                                 | -0.067                                                | -0.465                                                | -0.203                                | -0.271                                |
| YPL218W   | <i>SARI</i>   | -0.334                                              | -1.246                                              | -0.589                              | -0.723                              | -0.166                                                | -0.007                                                | -0.155                                | 0.140                                 | -0.081                                                | -0.335                                                | 0.091                                 | -0.219                                |
| YPL143W   | <i>RPL33A</i> | -0.076                                              | -0.236                                              | -0.166                              | -0.164                              | -0.023                                                | -0.087                                                | 0.284                                 | 0.119                                 | 0.158                                                 | -0.017                                                | 0.005                                 | -0.148                                |
| YOL120C   | <i>RPL18A</i> | -0.154                                              | -0.260                                              | -0.068                              | -0.160                              | 0.065                                                 | 0.025                                                 | 0.694                                 | 0.696                                 | 0.174                                                 | 0.020                                                 | -0.035                                | -0.272                                |
| YDL191W   | <i>RPL35A</i> | -0.037                                              | -0.308                                              | -0.193                              | -0.099                              | 0.275                                                 | -0.097                                                | 0.374                                 | 0.333                                 | 0.081                                                 | -0.346                                                | -0.319                                | -0.437                                |
| YPL198W_2 | <i>RPL7B</i>  | -2.432                                              | -2.539                                              | -1.071                              | -1.741                              | -0.131                                                | -0.211                                                | -0.128                                | -0.149                                | -1.710                                                | -1.304                                                | -0.649                                | -1.372                                |
| YKL180W   | <i>RPL17A</i> | -0.163                                              | -0.225                                              | 0.005                               | 0.028                               | 0.133                                                 | 0.009                                                 | 0.230                                 | 0.300                                 | 0.012                                                 | -0.208                                                | 0.092                                 | -0.196                                |
| YJL136C   | <i>RPS21B</i> | -0.455                                              | -0.700                                              | -0.658                              | -0.707                              | 0.095                                                 | -0.084                                                | 0.168                                 | 0.018                                 | -0.063                                                | -0.314                                                | -0.157                                | -0.420                                |
| YJL177W   | <i>RPL17B</i> | -0.193                                              | -0.203                                              | 0.083                               | 0.134                               | 0.026                                                 | 0.089                                                 | 0.338                                 | 0.381                                 | 0.148                                                 | -0.001                                                | 0.031                                 | -0.304                                |
| YPL081W   | <i>RPS9A</i>  | -0.088                                              | -0.524                                              | 0.276                               | -0.443                              | 0.437                                                 | 0.089                                                 | 0.284                                 | 0.385                                 | 0.024                                                 | 0.115                                                 | 0.157                                 | -0.086                                |
| YMR194W   | <i>RPL36A</i> | -0.316                                              | -0.469                                              | -0.186                              | -0.484                              | 0.149                                                 | 0.012                                                 | 0.168                                 | 0.167                                 | -0.273                                                | -0.858                                                | -0.538                                | -0.689                                |
| YPL079W   | <i>RPL21B</i> | -0.001                                              | -0.176                                              | -0.208                              | -0.046                              | 0.394                                                 | 0.161                                                 | 0.276                                 | 0.354                                 | 0.125                                                 | -0.004                                                | -0.106                                | -0.248                                |
| YNR053C   | <i>NOG2</i>   | -0.764                                              | -0.420                                              | -0.070                              | -0.779                              | -0.662                                                | -0.611                                                | -0.004                                | 0.208                                 | -0.218                                                | -0.252                                                | 0.031                                 | -0.404                                |
| YNL301C   | <i>RPL18B</i> | -0.284                                              | -0.248                                              | 0.394                               | -0.206                              | -0.297                                                | -0.073                                                | 0.389                                 | 0.373                                 | 0.035                                                 | -0.212                                                | -0.267                                | -0.571                                |
| YML056C   | <i>IMD4</i>   | -0.253                                              | -0.208                                              | -0.553                              | -0.310                              | -0.285                                                | -0.081                                                | 0.267                                 | -0.177                                | -0.064                                                | -0.328                                                | -0.443                                | -0.293                                |
| YNL044W   | <i>YIP3</i>   | -0.470                                              | -1.261                                              | 0.212                               | -0.270                              | -0.145                                                | -0.187                                                | 0.051                                 | 0.263                                 | -0.030                                                | 0.064                                                 | 0.123                                 | -0.019                                |
| YBR048W   | <i>RPS11B</i> | 0.139                                               | 0.064                                               | -0.130                              | 0.191                               | -0.049                                                | 0.178                                                 | 0.197                                 | 0.086                                 | 0.076                                                 | 0.105                                                 | -0.058                                | 0.088                                 |
| YNL096C   | <i>RPS7B</i>  | -0.237                                              | -0.457                                              | -0.286                              | -0.022                              | 0.290                                                 | 0.019                                                 | 0.165                                 | 0.288                                 | -0.022                                                | -0.333                                                | -0.005                                | -0.238                                |
| YLR287C-A | <i>RPS30A</i> | -0.229                                              | -0.074                                              | -0.002                              | -0.273                              | 0.006                                                 | -0.167                                                | 0.507                                 | 0.469                                 | -0.029                                                | -0.241                                                | -0.275                                | -0.515                                |
| YNL112W   | <i>DBP2</i>   | -0.870                                              | 0.124                                               | -0.441                              | 0.124                               | 0.388                                                 | 0.252                                                 | 0.430                                 | 0.256                                 | -1.095                                                | 0.217                                                 | -0.440                                | -0.125                                |
| YGL103W   | <i>RPL28</i>  | 0.010                                               | -0.060                                              | -0.184                              | 0.281                               | 0.883                                                 | -0.070                                                | 0.326                                 | 1.485                                 | 0.118                                                 | 0.066                                                 | 0.301                                 | 0.270                                 |

|           |               |        |        |        |        |        |        |        |        |        |        |        |        |
|-----------|---------------|--------|--------|--------|--------|--------|--------|--------|--------|--------|--------|--------|--------|
| YPR063C   |               | -0.472 | -0.764 | -0.116 | -0.446 | -0.209 | -0.079 | -0.014 | 0.049  | -0.437 | -0.734 | -0.043 | -0.493 |
| YAL030W   | <i>SNC1</i>   | -0.154 | -0.233 | 0.189  | -0.002 | 0.069  | -0.011 | 0.084  | -0.233 | -0.171 | -0.438 | -0.019 | 0.107  |
| YOR312C   | <i>RPL20B</i> | 0.226  | 0.043  | 0.295  | 0.076  | 0.054  | -0.105 | 0.493  | -0.066 | -0.039 | -0.040 | 0.086  | 0.138  |
| YJR094W-A | <i>RPL43B</i> | -0.086 | -0.484 | -0.404 | -0.544 | 0.053  | 0.012  | 0.110  | 0.086  | -0.054 | -0.369 | -0.473 | -0.617 |
| YIL018W   | <i>RPL2B</i>  | 0.023  | -0.032 | -0.076 | 0.172  | 0.242  | 0.020  | 0.363  | 0.352  | 0.008  | -0.329 | -0.290 | -0.619 |
| YKL081W   | <i>TEF4</i>   | 0.112  | 0.241  | -0.380 | 0.054  | 0.304  | 0.052  | 0.123  | 0.360  | -0.070 | 0.214  | -0.307 | 0.158  |
| YML085C   | <i>TUB1</i>   | 0.196  | -0.040 | 0.371  | 0.217  | -0.019 | -0.070 | -0.214 | -0.202 | 0.224  | 0.101  | 0.336  | 0.336  |
| YMR116C   | <i>ASC1</i>   | -0.259 | -0.058 | -0.095 | -0.396 | 0.223  | 0.260  | 0.920  | 0.368  | -0.289 | 0.019  | -0.050 | -0.370 |
| YDR450W   | <i>RPS18A</i> | -0.159 | -0.399 | -0.323 | -0.087 | -0.303 | -0.017 | 0.014  | 0.203  | 0.225  | 0.163  | -0.149 | -0.186 |
| YLR344W   | <i>RPL26A</i> | 0.027  | -0.480 | -0.385 | -0.506 | -0.019 | -0.331 | -0.251 | -0.189 | -0.012 | -0.125 | -0.162 | -0.254 |
| YLR448W   | <i>RPL6B</i>  | -0.010 | -0.054 | -0.219 | -0.012 | 0.017  | -0.127 | 0.066  | -0.032 | 0.009  | -0.182 | -0.189 | 0.003  |
| YFL034C-A | <i>RPL22B</i> | 0.011  | -0.917 | 0.479  | -0.088 | 0.427  | -0.238 | 0.667  | 0.834  | -0.047 | -0.284 | -0.209 | -0.610 |
| YPL198W   | <i>RPL7B</i>  | -2.432 | -2.539 | -1.071 | -1.741 | 0.057  | -0.080 | 0.253  | 0.132  | -0.181 | -0.342 | -0.240 | -0.367 |
| YPL031C   | <i>PHO85</i>  | 0.052  | -0.382 | 0.064  | 0.039  | 0.146  | 0.004  | -0.016 | 0.028  | 0.047  | -0.546 | 0.104  | 0.094  |
| YER102W   | <i>RPS8B</i>  | -0.030 | 0.188  | 0.387  | 0.158  | -0.034 | -0.178 | -0.060 | 0.043  | 0.220  | 0.181  | 0.214  | -0.046 |
| YGR148C   | <i>RPL24B</i> | 0.287  | 0.385  | -0.110 | -0.012 | 0.133  | 0.124  | 0.082  | 0.143  | 0.610  | 0.481  | -0.111 | -0.181 |
| YML024W   | <i>RPS17A</i> | -0.030 | -0.134 | -0.277 | -0.174 | 0.066  | -0.308 | 0.031  | 0.105  | 0.020  | -0.164 | -0.012 | -0.078 |
| YHR141C   | <i>RPL42B</i> | -0.230 | -0.256 | -0.063 | -0.273 | 0.103  | -0.092 | 0.234  | -0.001 | -0.142 | -0.570 | -0.352 | -0.311 |
| YLR406C   | <i>RPL31B</i> | -0.061 | -0.566 | -0.096 | -0.333 | 0.303  | -0.065 | 0.261  | 0.278  | -0.065 | -0.717 | -0.290 | -0.287 |
| YDL136W   | <i>RPL35B</i> | -0.130 | -0.337 | -0.135 | -0.246 | 0.215  | -0.005 | -0.012 | 0.156  | -0.153 | -0.379 | -1.955 | -1.893 |
| YPR132W   | <i>RPS23B</i> | -0.462 | -0.159 | -0.218 | -0.100 | 0.159  | -0.097 | 0.289  | 0.299  | 0.264  | 0.004  | -0.381 | -0.282 |
| YBL087C   | <i>RPL23A</i> | -0.337 | -0.216 | -0.301 | -0.224 | -0.092 | -0.021 | 0.064  | -0.028 | -0.024 | -0.119 | -0.387 | -0.172 |
| YPL090C   | <i>RPS6A</i>  | 0.264  | 0.131  | 0.030  | 0.020  | -0.005 | 0.000  | 0.327  | 0.094  | -0.204 | 0.206  | -0.027 | 0.102  |
| YBR181C   | <i>RPS6B</i>  | 0.305  | 0.457  | 0.161  | 0.069  | 0.191  | 0.047  | 0.102  | 0.203  | 0.153  | 0.004  | -0.086 | -0.233 |
| YHR001W-A | <i>QCR10</i>  | 0.022  | 0.016  | -0.001 | 0.148  | -0.035 | -0.130 | -0.043 | -0.345 | -0.215 | -0.473 | 0.407  | 0.374  |
| YMR079W   | <i>SEC14</i>  | -0.137 | -0.192 | -0.228 | -0.199 | -0.076 | -0.151 | -0.142 | -0.147 | -0.493 | 0.067  | -0.229 | -0.431 |
| YDR500C   | <i>RPL37B</i> | -0.061 | -0.280 | -0.301 | -0.337 | 0.005  | -0.058 | 0.025  | 0.272  | 0.054  | -0.261 | -0.103 | -0.549 |
| YER003C   | <i>PMI40</i>  | -0.045 | -0.028 | 0.118  | 0.115  | -0.034 | -0.256 | -0.079 | -0.254 | -0.015 | -0.035 | 0.041  | 0.001  |
| YDL130W   | <i>RPP1B</i>  | -0.328 | -0.065 | 0.188  | -0.121 | 0.045  | -0.110 | 0.021  | -0.052 | -0.085 | 0.013  | -0.119 | 0.036  |
| YDL079C   | <i>MRK1</i>   | 0.085  | 0.138  | 0.041  | -0.087 | -0.001 | -0.258 | -0.369 | -0.430 | 0.107  | 0.080  | -0.230 | -0.397 |
| YHR077C   | <i>NMD2</i>   | 0.032  | 0.100  | 0.082  | -0.051 | 0.222  | 0.125  | -0.037 | -0.228 | -0.019 | 0.184  | 0.197  | 0.233  |
| YKL002W   | <i>DID4</i>   | 0.001  | -0.132 | -0.013 | -0.122 | 0.231  | -0.006 | 0.031  | -0.118 | 0.025  | 0.019  | 0.014  | -0.020 |
| YOR182C   | <i>RPS30B</i> | -0.254 | -0.446 | -0.242 | -0.380 | -0.090 | -0.180 | 0.187  | 0.103  | 0.013  | -0.213 | -0.240 | -0.350 |
| YBL091C-A | <i>SCS22</i>  | 0.059  | -0.114 | 0.023  | -0.201 | 0.171  | 0.083  | 0.103  | 0.034  | 0.016  | -0.157 | -0.323 | -0.455 |
| YLR061W   | <i>RPL22A</i> | -0.060 | -0.214 | -0.203 | -0.129 | -0.056 | -0.107 | 0.210  | 0.075  | 0.014  | -0.079 | -0.246 | -0.367 |
| YAL003W   | <i>EFB1</i>   | -0.014 | -0.247 | -0.466 | -0.066 | -0.004 | 0.056  | -0.110 | 0.071  | 0.194  | 0.063  | -0.114 | -0.051 |
| YOL048C   |               | -0.028 | -0.174 | -0.033 | -0.110 | 0.093  | -0.005 | -0.158 | -0.129 | -0.218 | -0.115 | -0.010 | 0.235  |
| YDR059C   | <i>UBC5</i>   | -0.350 | -0.248 | 0.375  | 0.237  | -0.040 | -0.097 | -0.077 | -0.060 | 0.231  | 0.048  | -0.114 | -0.149 |
| YDR139C   | <i>RUB1</i>   | 0.115  | 0.182  | 0.203  | 0.180  | -0.301 | -0.040 | -0.237 | -0.112 | -0.099 | -0.413 | 0.147  | -0.336 |
| YML034W_2 | <i>SRC1</i>   | -0.050 | -0.350 | -0.025 | 0.245  | -0.080 | -0.096 | -0.145 | -0.419 | 0.357  | -0.004 | 0.125  | -0.089 |
| YML034W   | <i>SRC1</i>   | -0.050 | -0.350 | -0.025 | 0.245  | 0.002  | -0.161 | -0.082 | -0.233 | 0.068  | 0.047  | 0.027  | -0.034 |
| YML124C   | <i>TUB3</i>   | 0.095  | -0.482 | -0.034 | 0.124  | 0.032  | -0.231 | -0.247 | -0.191 | -0.032 | -0.171 | 0.032  | 0.137  |
| YBR219C   |               | 0.110  | -0.061 | -0.109 | -0.099 | 0.123  | -0.002 | -0.142 | -0.317 | 0.087  | 0.200  | -0.063 | -0.051 |
| YLR128W   | <i>DCN1</i>   | 0.102  | -0.253 | -0.001 | 0.077  | 0.054  | 0.040  | -0.016 | 0.116  | 0.098  | -0.076 | -0.162 | -0.109 |
| YDL064W   | <i>UBC9</i>   | -0.100 | -0.301 | -0.115 | -0.283 | -0.137 | -0.133 | -0.064 | -0.221 | 0.126  | 0.060  | -0.114 | -0.128 |
| YDL108W   | <i>KIN28</i>  | -0.068 | -0.461 | 0.233  | 0.007  | 0.108  | -0.052 | -0.107 | -0.214 | -0.037 | -0.125 | 0.286  | -0.012 |
| YOL047C   |               | -0.042 | -0.103 | -0.056 | -0.011 | 0.049  | 0.025  | 0.016  | -0.083 | 0.093  | 0.049  | 0.198  | -0.107 |
| YHR101C   | <i>BIG1</i>   | -0.027 | -0.112 | -0.064 | -0.104 | -0.027 | 0.150  | 0.017  | -0.077 | 0.054  | 0.007  | -0.005 | -0.189 |
| YPR187W   | <i>RPO26</i>  | 0.128  | 0.258  | 0.343  | -0.068 | 0.087  | 0.091  | -0.185 | -0.255 | 0.119  | -0.014 | 0.049  | -0.216 |
| YPL241C   | <i>CIN2</i>   | -0.032 | -0.211 | -0.054 | -0.188 | 0.004  | -0.177 | 0.077  | -0.089 | 0.334  | 0.272  | 0.148  | -0.201 |

|             |               |        |        |        |        |        |        |        |        |        |        |        |        |
|-------------|---------------|--------|--------|--------|--------|--------|--------|--------|--------|--------|--------|--------|--------|
| YKL006C-A   | <i>SFT1</i>   | -0.009 | -0.265 | 0.011  | -0.040 | 0.126  | 0.149  | 0.198  | 0.046  | -0.061 | -0.027 | -0.013 | -0.035 |
| YKL006W     | <i>RPL14A</i> | -0.155 | -0.155 | 0.077  | -0.144 | 0.345  | 0.131  | 0.519  | 0.513  | 0.170  | 0.115  | -0.121 | -0.218 |
| YIL133C     | <i>RPL16A</i> | -0.284 | -0.122 | 0.039  | -0.236 | 0.143  | 0.037  | 0.179  | 0.135  | -0.079 | -0.304 | -0.124 | -0.467 |
| YNL069C     | <i>RPL16B</i> | 0.015  | 0.523  | 0.710  | 0.092  | 0.322  | 0.032  | -0.250 | 0.021  | 0.213  | -0.111 | -0.168 | -0.365 |
| YDR447C     | <i>RPS17B</i> | -0.094 | -0.253 | -0.185 | -0.120 | -0.069 | -0.201 | 0.166  | 0.147  | 0.000  | -0.468 | -0.333 | -0.172 |
| YGL076C 2   | <i>RPL7A</i>  | 0.162  | 0.047  | -0.261 | -0.071 | 0.292  | -0.036 | 0.183  | 0.292  | 0.291  | 0.122  | -0.124 | -0.035 |
| YFR032C-A   | <i>RPL29</i>  | -0.044 | 0.027  | -0.403 | -0.045 | 0.039  | -0.006 | 0.070  | -0.022 | 0.187  | 0.048  | -0.324 | -0.322 |
| YJL189W     | <i>RPL39</i>  | -0.464 | -0.587 | -0.569 | -0.027 | 0.276  | 0.084  | 0.118  | 0.178  | -0.519 | -0.779 | -0.547 | -0.105 |
| YPR098C     |               | 0.119  | -0.021 | 0.080  | -0.059 | -0.638 | -0.585 | -0.253 | -0.150 | 0.104  | -0.125 | -0.209 | -0.313 |
| YER074W-A 2 | <i>YOS1</i>   | 0.129  | -0.067 | 0.023  | 0.221  | -0.120 | -0.187 | -0.136 | -0.193 | 0.067  | 0.079  | -0.005 | -0.032 |
| YJL041W     | <i>NSP1</i>   | -0.069 | -0.015 | -0.081 | 0.022  | 0.104  | 0.035  | -0.021 | 0.069  | -0.298 | 0.013  | -0.036 | 0.154  |
| YBR089C-A   | <i>NHP6B</i>  | 0.124  | -0.185 | -0.235 | -0.003 | -0.242 | -0.017 | -0.070 | 0.006  | 0.169  | 0.086  | 0.023  | -0.064 |
| YOR122C     | <i>PFY1</i>   | 0.106  | -0.326 | -0.389 | -0.057 | 0.199  | 0.047  | 0.068  | 0.006  | 0.172  | 0.199  | 0.191  | -0.063 |
| YLR093C     | <i>NYV1</i>   | -0.129 | -0.407 | 0.054  | 0.120  | -0.315 | -0.056 | -0.091 | 0.001  | -0.037 | -0.433 | -0.049 | 0.009  |
| YLL050C     | <i>COF1</i>   | 0.155  | -0.273 | -0.191 | 0.200  | -0.008 | -0.135 | -0.162 | -0.067 | -0.153 | -0.231 | -0.069 | -0.315 |
| YJL205C-A   |               | -0.254 | -0.316 | 0.026  | -0.151 | -0.233 | 0.037  | 0.037  | -0.053 | -0.302 | -0.389 | 0.173  | -0.271 |
| YNL162W     | <i>RPL42A</i> | -0.002 | -0.433 | -0.145 | -0.191 | 0.027  | -0.343 | 0.286  | 0.216  | 0.163  | -0.204 | 0.013  | -0.227 |
| YDR025W     | <i>RPS11A</i> | -0.128 | -0.034 | -0.187 | 0.126  | 0.129  | 0.006  | -0.119 | 0.477  | 0.140  | 0.035  | -0.176 | -0.093 |
| YIL106W     | <i>MOB1</i>   | -0.010 | -0.193 | 0.081  | 0.095  | 0.031  | 0.108  | 0.128  | 0.281  | -0.014 | -0.253 | 0.013  | 0.275  |
| YNL265C     | <i>IST1</i>   | -0.100 | -0.139 | 0.322  | 0.291  | 0.156  | 0.145  | 0.019  | -0.231 | -0.014 | -0.303 | -0.107 | -0.265 |
| YLR275W     | <i>SMD2</i>   | -0.238 | -0.495 | -0.048 | -0.198 | 0.005  | -0.123 | -0.151 | -0.250 | 0.092  | -0.043 | -0.028 | -0.162 |
| YIL004C     | <i>BET1</i>   | -0.063 | -0.166 | 0.333  | -0.075 | -0.270 | 0.022  | 0.033  | 0.194  | 0.010  | -0.186 | 0.149  | -0.222 |
| YBL026W     | <i>LSM2</i>   | -0.093 | -0.325 | 0.015  | -0.269 | -0.085 | 0.145  | -0.055 | 0.082  | -0.307 | -0.672 | -0.071 | -0.333 |
| YJL024C     | <i>APS3</i>   | -0.022 | -0.295 | -0.069 | -0.123 | 0.056  | -0.030 | 0.030  | -0.048 | 0.020  | -0.092 | 0.071  | -0.020 |
| YHL001W     | <i>RPL14B</i> | -0.184 | -0.294 | 0.027  | -0.123 | 0.106  | 0.126  | 0.040  | 0.050  | -0.012 | -0.306 | -0.178 | -0.235 |
| YNL130C     | <i>CPT1</i>   | 0.026  | -0.311 | -0.150 | -0.118 | -0.321 | -0.293 | -0.225 | -0.061 | 0.014  | -0.193 | -0.149 | -0.440 |
| YNL312W     | <i>RFA2</i>   | 0.190  | -0.303 | -0.078 | 0.180  | 0.029  | -0.046 | -0.039 | 0.097  | 0.087  | 0.023  | 0.206  | -0.152 |
| YER093C-A   |               | 0.057  | -0.145 | -0.042 | 0.108  | 0.043  | -0.093 | -0.034 | -0.042 | -0.121 | -0.200 | 0.265  | 0.070  |
| YDL125C     | <i>HNT1</i>   | 0.178  | -0.294 | -0.848 | -0.688 | -0.128 | -0.092 | -0.710 | -0.562 | 0.192  | -0.183 | -0.365 | -0.303 |
| YJR145C     | <i>RPS4A</i>  | -0.026 | -0.157 | -0.175 | -0.028 | 0.174  | 0.056  | 0.141  | 0.301  | -0.023 | -0.176 | -0.110 | 0.025  |
| YLR185W     | <i>RPL37A</i> | -0.280 | -0.546 | -0.669 | -0.324 | 0.094  | -0.053 | -0.091 | 0.072  | -0.190 | -0.467 | -0.164 | -0.534 |
| YNL246W     | <i>VPS75</i>  | -0.115 | -0.368 | -0.059 | -0.429 | -0.268 | -0.094 | -0.028 | -0.082 | -0.071 | -0.258 | -0.109 | -0.281 |
| YLR426W     |               | -0.061 | -0.320 | -0.091 | -0.030 | -0.033 | -0.061 | -0.010 | 0.134  | -0.009 | -0.062 | 0.089  | -0.039 |
| YBL027W     | <i>RPL19B</i> | 0.095  | 0.095  | -0.025 | -0.039 | 0.380  | -0.169 | 0.210  | 0.103  | 0.020  | -0.105 | -0.249 | -0.292 |
| YHR016C     | <i>YSC84</i>  | 0.299  | 0.010  | -0.133 | -0.157 | 0.001  | 0.017  | -0.045 | -0.148 | 0.078  | 0.129  | 0.185  | -0.012 |
| YBR119W     | <i>MUD1</i>   | -0.068 | -0.142 | -0.148 | -0.255 | -0.091 | 0.072  | -0.082 | 0.035  | 0.126  | 0.026  | -0.183 | -0.181 |
| YFL034C-B   | <i>MOB2</i>   | 0.021  | -0.021 | 0.144  | 0.241  | 0.014  | 0.040  | -0.032 | 0.166  | 0.279  | 0.184  | -0.021 | -0.211 |
| YMR292W     | <i>GOT1</i>   | 0.044  | -0.435 | 0.203  | -0.217 | -0.130 | -0.120 | -0.124 | -0.050 | 0.016  | -0.207 | -0.045 | -0.174 |
| YGR001C     | <i>AML1</i>   | 0.489  | 0.323  | -0.049 | -0.171 | 0.043  | -0.116 | -0.141 | -0.171 | 0.254  | -0.065 | -0.015 | -0.264 |
| YKL157W     | <i>APE2</i>   | -0.012 | 0.095  | 0.067  | -0.009 | -0.037 | -0.428 | -0.216 | -0.134 | -0.054 | -0.037 | 0.049  | -0.136 |
| YJR021C     | <i>REC107</i> | -0.120 | -0.114 | 0.044  | 0.022  | -0.017 | 0.104  | -0.070 | 0.059  | 0.073  | 0.107  | 0.068  | -0.094 |
| YLR306W     | <i>UBC12</i>  | -0.226 | -0.243 | 0.130  | -0.127 | 0.093  | -0.071 | -0.040 | -0.136 | -0.090 | -0.545 | 0.245  | -0.208 |
| YMR133W     | <i>REC114</i> | 0.022  | -0.142 | -0.142 | -0.120 | -0.011 | -0.133 | -0.096 | -0.137 | 0.203  | -0.081 | -0.106 | -0.329 |
| YLR211C     |               | -0.201 | -0.375 | -0.194 | -0.102 | -0.058 | -0.126 | -0.248 | 0.219  | -0.010 | 0.039  | -0.022 | -0.064 |
| YBL018C     | <i>POP8</i>   | -0.192 | -0.429 | 0.173  | -0.254 | -0.018 | -0.146 | 0.018  | -0.153 | 0.333  | 0.122  | -0.426 | -0.652 |
| YNL012W     | <i>SPO1</i>   | -0.141 | -0.226 | 0.072  | 0.013  | 0.062  | -0.186 | -0.116 | -0.386 | 0.301  | 0.145  | -0.020 | -0.081 |
| YCR028C-A   | <i>RIM1</i>   | 0.087  | -0.082 | -0.015 | -0.156 | 0.118  | -0.028 | -0.061 | -0.232 | -0.087 | -0.194 | 0.043  | -0.053 |
| YGL251C     | <i>HFM1</i>   | 0.292  | 0.118  | 0.000  | -0.160 | 0.064  | 0.050  | 0.120  | 0.156  | 0.096  | 0.020  | -0.097 | -0.142 |
| YKL186C 4   | <i>MTR2</i>   | 0.124  | -0.136 | 0.197  | 0.012  | -0.159 | -0.094 | -0.025 | -0.231 | -0.076 | -0.112 | -0.153 | -0.265 |
| YLR078C     | <i>BOS1</i>   | 0.078  | -0.109 | 0.049  | 0.012  | -0.078 | -0.096 | -0.093 | 0.005  | 0.077  | 0.030  | 0.071  | -0.104 |

|           |               |        |        |        |        |        |        |        |        |        |        |        |        |
|-----------|---------------|--------|--------|--------|--------|--------|--------|--------|--------|--------|--------|--------|--------|
| YKL186C_6 | <i>MTR2</i>   | 0.124  | -0.136 | 0.197  | 0.012  | -0.043 | -0.239 | -0.138 | -0.259 | -0.031 | -0.023 | 0.126  | 0.000  |
| YKL186C   | <i>MTR2</i>   | 0.124  | -0.136 | 0.197  | 0.012  | 0.065  | -0.123 | -0.106 | -0.274 | -0.094 | -0.138 | -0.145 | -0.223 |
| YKL186C_3 | <i>MTR2</i>   | 0.124  | -0.136 | 0.197  | 0.012  | -0.075 | -0.086 | 0.155  | -0.004 | 0.056  | 0.018  | 0.027  | -0.035 |
| YKL186C_2 | <i>MTR2</i>   | 0.124  | -0.136 | 0.197  | 0.012  | -0.123 | -0.159 | -0.017 | -0.123 | -0.044 | 0.123  | -0.013 | -0.067 |
| YBL059W   |               | 0.052  | -0.219 | -0.155 | -0.217 | 0.139  | 0.030  | -0.084 | -0.079 | -0.090 | -0.136 | 0.426  | 0.263  |
| YER007C-A | <i>RBF20</i>  | -0.113 | -0.155 | 0.154  | -0.236 | -0.037 | 0.072  | -0.161 | -0.204 | -0.047 | -0.179 | -0.066 | -0.368 |
| YDR005C   | <i>MAF1</i>   | -0.081 | -0.027 | -0.077 | 0.101  | 0.017  | 0.072  | -0.045 | 0.152  | 0.028  | 0.036  | -0.092 | -0.125 |
| YHR012W   | <i>VPS29</i>  | 0.192  | -0.064 | 0.144  | -0.046 | -0.055 | -0.169 | -0.068 | -0.226 | 0.088  | -0.151 | 0.197  | -0.040 |
| YGR029W   | <i>ERV1</i>   | -0.045 | -0.207 | -0.033 | -0.214 | 0.037  | -0.036 | -0.033 | 0.039  | -0.037 | -0.131 | 0.045  | -0.321 |
| YKL190W   | <i>CNB1</i>   | -0.171 | -0.555 | -0.047 | -0.212 | 0.120  | 0.091  | -0.094 | -0.055 | 0.033  | -0.020 | 0.057  | -0.166 |
| YPL129W   | <i>TAF14</i>  | -0.318 | -0.624 | -0.059 | -0.276 | -0.168 | -0.071 | -0.266 | 0.080  | -0.048 | -0.119 | 0.193  | -0.110 |
| YPL175W   | <i>SPT14</i>  | -0.138 | -0.142 | 0.089  | -0.104 | -0.006 | 0.086  | 0.017  | 0.178  | 0.008  | 0.011  | 0.019  | -0.142 |
| YDL189W   | <i>RBS1</i>   | -0.057 | 0.114  | -0.085 | -0.037 | 0.097  | 0.080  | 0.004  | 0.229  | 0.359  | 0.542  | 0.626  | 0.414  |
| YDL137W   | <i>ARF2</i>   | -0.100 | -0.350 | 0.131  | -0.153 | -0.025 | -0.232 | -0.160 | -0.247 | -0.288 | -0.563 | -0.216 | -0.457 |
| YGR027C   | <i>RPS25A</i> | 0.475  | 0.312  | -0.146 | -0.065 | 0.222  | 0.138  | 0.129  | 0.248  | 0.087  | -0.081 | -0.030 | -0.102 |
| YER044C-A | <i>MEI4</i>   | -0.073 | 0.012  | -0.063 | -0.027 | 0.055  | 0.061  | -0.113 | -0.080 | 0.062  | -0.029 | -0.107 | -0.168 |
| YGR183C   | <i>QCR9</i>   | 0.157  | -0.098 | 0.269  | 0.451  | 0.056  | -0.055 | 0.088  | -0.023 | 0.296  | -0.135 | 0.326  | 0.298  |
| YCR097W_2 | <i>HMRA1</i>  | 0.046  | -0.092 | -0.144 | -0.214 | 0.150  | -0.066 | -0.143 | -0.141 | -0.358 | -0.406 | -0.328 | -0.592 |
| YGL232W   | <i>TAN1</i>   | 0.211  | -0.087 | -0.107 | -0.279 | -0.031 | -0.279 | -0.031 | -0.231 | -0.037 | -0.078 | -0.092 | -0.323 |
| YMR225C   | <i>MRPL44</i> | -0.552 | -0.293 | 0.301  | 0.174  | -0.022 | 0.075  | -0.071 | -0.045 | -0.476 | -0.310 | 0.351  | 0.093  |
| YER074W-A | <i>YOS1</i>   | 0.129  | -0.067 | 0.023  | 0.221  | -0.059 | -0.082 | 0.039  | 0.071  | -0.422 | -0.626 | 0.063  | -0.462 |
| YGR225W   | <i>AMA1</i>   | 0.136  | 0.115  | 0.030  | -0.133 | 0.035  | -0.114 | 0.042  | -0.224 | 0.176  | 0.058  | 0.021  | -0.124 |
| YNL147W   | <i>LSM7</i>   | -0.642 | -0.728 | 0.057  | -0.362 | -0.359 | -0.227 | -0.028 | 0.159  | -0.675 | -0.829 | -0.031 | -0.467 |
| YMR033W   | <i>ARP9</i>   | -0.251 | 0.004  | -0.091 | 0.066  | 0.019  | -0.097 | -0.149 | -0.148 | -0.239 | 0.068  | 0.165  | 0.040  |
| YAL001C   | <i>TFC3</i>   | 0.007  | -0.106 | -0.034 | 0.038  | -0.222 | -0.122 | -0.181 | 0.086  | -0.010 | -0.075 | -0.029 | -0.043 |
| YDR424C_2 | <i>DYN2</i>   | -0.204 | -0.172 | -0.081 | -0.207 | 0.041  | 0.013  | -0.081 | -0.059 | 0.427  | 0.547  | 0.338  | 0.551  |
| YDR092W   | <i>UBC13</i>  | 0.338  | 0.230  | 0.263  | 0.201  | -0.207 | -0.023 | -0.156 | -0.104 | 0.080  | 0.013  | -0.185 | -0.277 |
| YDR424C   | <i>DYN2</i>   | -0.204 | -0.172 | -0.081 | -0.207 | -0.093 | -0.124 | -0.092 | 0.134  | 0.048  | -0.041 | -0.052 | -0.131 |
| YEL012W   | <i>UBC8</i>   | -0.020 | -0.174 | 0.030  | 0.144  | 0.043  | -0.028 | 0.003  | 0.171  | 0.020  | -0.248 | -0.079 | -0.038 |
| YGL033W   | <i>HOP2</i>   | -0.214 | -0.042 | 0.039  | -0.172 | 0.137  | 0.129  | 0.319  | -0.068 | 0.302  | 0.070  | -0.152 | -0.161 |
| YDL115C   | <i>IWR1</i>   | -0.087 | -0.020 | 0.334  | 0.000  | -0.044 | -0.088 | 0.045  | 0.142  | 0.151  | 0.091  | 0.050  | -0.134 |
| YKL186C_5 | <i>MTR2</i>   | 0.124  | -0.136 | 0.197  | 0.012  | 0.074  | -0.111 | 0.048  | -0.066 | 0.116  | -0.021 | 0.033  | -0.082 |
| YGL076C   | <i>RPL7A</i>  | 0.162  | 0.047  | -0.261 | -0.071 | 0.566  | 0.071  | 0.219  | 0.216  | 0.279  | 0.075  | -0.116 | 0.037  |
| YNL050C   |               | 0.109  | 0.048  | 0.101  | 0.052  | -0.193 | 0.266  | -0.179 | -0.025 | 0.198  | 0.148  | 0.182  | -0.049 |
| YGL187C   | <i>COX4</i>   | -0.100 | -0.274 | 0.175  | 0.425  | 0.383  | 0.282  | 0.162  | 0.129  | 0.010  | 0.116  | -0.092 | -0.124 |
| YGL087C   | <i>MMS2</i>   | 0.594  | 0.140  | 0.157  | -0.181 | 0.227  | 0.030  | -0.074 | 0.023  | 0.523  | 0.184  | 0.214  | -0.391 |
| YBL059C-A |               | -0.091 | -0.298 | 0.229  | 0.081  | -0.179 | -0.151 | -0.117 | 0.056  | -0.225 | -0.225 | 0.210  | 0.022  |
| YHR039C-A | <i>VMA10</i>  | 0.037  | -0.012 | -0.048 | -0.020 | -0.021 | 0.065  | 0.054  | 0.082  | 0.020  | -0.070 | 0.016  | 0.000  |
| YIL052C   | <i>RPL34B</i> | -0.029 | 0.014  | -0.131 | 0.007  | 0.131  | 0.009  | 0.116  | 0.141  | 0.036  | 0.079  | -0.037 | -0.243 |
| YHR123W   | <i>EPT1</i>   | -0.278 | -0.426 | -0.136 | -0.188 | 0.149  | 0.047  | 0.057  | -0.114 | -0.422 | -0.538 | -0.170 | -0.153 |
| YBR186W   | <i>PCH2</i>   | 0.137  | -0.073 | -0.260 | -0.323 | -0.066 | -0.202 | 0.222  | -0.029 | 0.089  | 0.011  | 0.046  | -0.143 |
| YDR381W   | <i>YRA1</i>   | -0.003 | 0.090  | -0.082 | 1.186  | -0.416 | 0.011  | 0.309  | 0.312  | 0.144  | 0.110  | -0.164 | 0.214  |
| YOL121C   | <i>RPS19A</i> | 0.125  | -0.284 | -0.179 | -0.051 | 0.099  | -0.033 | -0.061 | 0.088  | 0.317  | 0.141  | 0.008  | -0.017 |
| YML073C   | <i>RPL6A</i>  | -0.464 | -0.066 | 0.134  | -0.027 | 0.170  | -0.057 | 0.124  | 0.092  | -0.311 | 0.162  | 0.248  | 0.109  |
| YDR397C   | <i>NCB2</i>   | 0.044  | -0.515 | 0.196  | -0.051 | -0.005 | -0.391 | -0.278 | -0.358 | 0.106  | 0.079  | 0.045  | -0.156 |
| YBL040C   | <i>ERD2</i>   | 0.228  | -0.276 | 0.067  | 0.061  | -0.103 | 0.064  | -0.002 | 0.106  | 0.239  | -0.433 | -0.123 | -0.056 |
| YFR031C-A | <i>RPL2A</i>  | -0.159 | 0.026  | -0.045 | -0.115 | -0.036 | -0.240 | -0.024 | 0.017  | -0.223 | -0.194 | 0.005  | -0.051 |
| YER179W   | <i>DMC1</i>   | 0.131  | 0.065  | 0.091  | -0.183 | 0.011  | -0.143 | -0.186 | -0.259 | 0.186  | 0.289  | 0.037  | -0.226 |
| YML025C   | <i>YML6</i>   | -0.010 | -0.338 | 0.132  | 0.377  | 0.055  | -0.255 | -0.007 | -0.053 | 0.025  | -0.130 | -0.018 | -0.182 |
| YHR097C   |               | -0.036 | -0.122 | -0.178 | -0.173 | 0.106  | -0.123 | -0.060 | -0.168 | 0.250  | 0.019  | -0.006 | -0.020 |

|           |               |        |        |        |        |        |        |        |        |        |        |        |        |
|-----------|---------------|--------|--------|--------|--------|--------|--------|--------|--------|--------|--------|--------|--------|
| YCR097W   | <i>HMRA1</i>  | 0.046  | -0.092 | -0.144 | -0.214 | -0.037 | -0.262 | -0.227 | 0.123  | 0.192  | 0.478  | 0.286  | 0.446  |
| YGL137W   | <i>SEC27</i>  | 0.290  | 0.103  | 0.125  | 0.216  | 0.168  | 0.134  | -0.206 | -0.142 | 0.522  | 0.000  | -0.165 | 0.083  |
| YKL156W   | <i>RPS27A</i> | -0.165 | -0.683 | 0.193  | -0.041 | -0.095 | -0.380 | -0.324 | -0.012 | 0.101  | -0.159 | 0.025  | -0.190 |
| YKR094C   | <i>RPL40B</i> | -0.442 | -0.304 | -0.332 | -0.256 | 0.024  | -0.074 | 0.055  | 0.271  | -0.059 | -0.381 | -0.335 | -0.528 |
| YKR057W   | <i>RPS21A</i> | -0.077 | -0.261 | -0.298 | -0.388 | 0.070  | 0.075  | 0.206  | 0.176  | 0.220  | -0.006 | -0.039 | -0.352 |
| YOR234C   | <i>RPL33B</i> | -0.099 | -0.476 | -0.247 | -0.126 | 0.151  | 0.070  | 0.181  | 0.149  | 0.037  | -0.310 | -0.092 | -0.389 |
| YGL189C   | <i>RPS26A</i> | 0.252  | 0.209  | -0.394 | -0.512 | -0.244 | -0.512 | -0.305 | -0.296 | 0.043  | -0.158 | -0.103 | -0.138 |
| YBL072C   | <i>RPS8A</i>  | -0.050 | 0.343  | 0.326  | 0.240  | 0.054  | 0.060  | 0.160  | 0.231  | 0.002  | 0.185  | -0.113 | 0.315  |
| YLR316C   | <i>TAD3</i>   | 0.203  | 0.325  | 0.263  | 0.012  | -0.253 | -0.109 | -0.172 | 0.029  | -0.059 | -0.023 | -0.052 | 0.043  |
| YLR316C 2 | <i>TAD3</i>   | 0.203  | 0.325  | 0.263  | 0.012  | -0.007 | -0.025 | -0.133 | -0.085 | 0.024  | 0.050  | 0.076  | -0.091 |
| YBL050W   | <i>SEC17</i>  | -0.099 | -0.192 | 0.057  | 0.064  | 0.105  | 0.132  | 0.255  | 0.191  | -0.010 | -0.176 | 0.119  | 0.005  |
| YER056C-A | <i>RPL34A</i> | -0.146 | -0.086 | -0.188 | -0.118 | 0.068  | -0.075 | 0.089  | 0.191  | 0.136  | -0.120 | -0.159 | -0.292 |
| YMR201C   | <i>RAD14</i>  | -0.107 | -0.176 | -0.035 | -0.039 | -0.049 | -0.152 | -0.111 | -0.150 | 0.091  | -0.198 | 0.022  | -0.113 |
| YIL111W   | <i>COX5B</i>  | -0.241 | -0.416 | -0.029 | -0.099 | 0.272  | -0.039 | 0.030  | -0.127 | -0.197 | -0.142 | 0.113  | -0.049 |
| YDL219W   | <i>DTD1</i>   | 0.079  | -0.349 | -0.156 | -0.361 | 0.015  | -0.068 | -0.084 | 0.103  | 0.211  | -0.708 | -0.267 | -0.542 |
| YML094W   | <i>GIM5</i>   | 0.093  | -0.215 | -0.151 | -0.362 | 0.115  | -0.098 | -0.125 | -0.122 | 0.200  | -0.029 | 0.121  | -0.239 |
| YGR001C 2 | <i>AML1</i>   | 0.489  | 0.323  | -0.049 | -0.171 | -0.238 | 0.198  | -0.043 | -0.179 | 0.672  | 0.342  | 0.009  | -0.161 |
| YPR028W   | <i>YOP1</i>   | 0.130  | -0.218 | -0.017 | -0.025 | -0.656 | -0.158 | 0.327  | -0.043 | 0.348  | 0.008  | 0.004  | -0.202 |
| YGL030W   | <i>RPL30</i>  | 0.113  | -0.332 | -0.104 | 0.054  | 0.496  | 0.023  | 0.102  | 0.288  | 0.085  | -0.045 | 0.057  | -0.022 |
| YHR041C   | <i>SRB2</i>   | -0.555 | -0.217 | 0.058  | -0.233 | -0.029 | 0.070  | 0.266  | 0.237  | 0.105  | -0.122 | 0.095  | -0.214 |
| YGR118W   | <i>RPS23A</i> | 0.430  | 0.109  | -0.122 | -0.206 | 0.195  | -0.017 | 0.182  | 0.231  | 0.042  | 0.145  | 0.039  | -0.143 |
| YBR191W   | <i>RPL21A</i> | 0.209  | -0.021 | -0.052 | 0.088  | 0.134  | -0.132 | 0.213  | 0.043  | 0.175  | 0.098  | -0.098 | -0.006 |
| YOR293W   | <i>RPS10A</i> | -0.058 | -0.312 | -0.175 | -0.088 | -0.010 | -0.074 | 0.028  | 0.019  | -0.120 | -0.330 | -0.151 | -0.065 |
| YER131W   | <i>RPS26B</i> | -0.353 | -0.361 | -0.110 | -0.075 | 0.028  | 0.057  | 0.077  | 0.283  | 0.217  | 0.075  | -0.061 | -0.406 |
| YGL031C   | <i>RPL24A</i> | 0.538  | 0.416  | -0.075 | 0.082  | 0.215  | 0.047  | -0.200 | 0.529  | 0.424  | 0.166  | 0.006  | -0.179 |
| YOL127W   | <i>RPL25</i>  | 0.324  | 0.061  | -0.170 | 0.039  | 0.399  | 0.175  | 0.317  | 0.430  | 0.274  | -0.081 | -0.118 | -0.307 |
| YHR021C   | <i>RPS27B</i> | 0.048  | -0.263 | -0.019 | -0.099 | -0.066 | -0.178 | 0.010  | 0.055  | 0.101  | -0.055 | -0.087 | -0.133 |
| YHR203C   | <i>RPS4B</i>  | -0.087 | 0.136  | 0.268  | 0.012  | 0.261  | 0.003  | 0.225  | 0.520  | -0.002 | -0.086 | 0.159  | -0.005 |
| YFL039C   | <i>ACT1</i>   | 0.020  | 0.397  | 0.145  | 0.308  | -0.190 | -0.082 | 0.009  | 0.433  | 0.172  | 0.112  | -0.076 | 0.257  |
| YDR305C   | <i>HNT2</i>   | 0.067  | -0.083 | -0.090 | -0.153 | 0.029  | 0.119  | -0.091 | 0.515  | -0.101 | -0.226 | 0.042  | -0.237 |
| YPL249C-A | <i>RPL36B</i> | 0.001  | -0.139 | -0.066 | 0.013  | 0.272  | 0.335  | 0.193  | 0.390  | -0.041 | 0.016  | 0.115  | 0.102  |
| YDL083C   | <i>RPS16B</i> | 0.012  | -0.260 | -0.229 | -0.163 | 0.192  | -0.076 | 0.045  | 0.107  | 0.024  | -0.110 | -0.301 | -0.373 |
| YBR084C-A | <i>RPL19A</i> | 0.068  | -0.077 | 0.043  | 0.015  | 0.067  | -0.213 | 0.310  | 0.257  | 0.171  | 0.088  | -0.173 | -0.133 |
| YER074W   | <i>RPS24A</i> | 0.046  | -0.252 | -0.088 | -0.347 | 0.176  | -0.149 | 0.230  | 0.231  | 0.169  | -0.007 | -0.015 | -0.092 |
| SNR17A    |               | 0.613  | 0.669  | 0.730  | 1.130  | 0.600  | 0.667  | 0.847  | 1.165  | 0.737  | 0.647  | 0.497  | 1.085  |
| YDR367W   |               | -0.117 | -0.221 | 0.262  | 0.160  | -0.004 | 0.095  | 0.017  | 0.042  | 0.295  | 0.027  | -0.100 | -0.179 |
| YMR125W   | <i>STO1</i>   | -0.113 | 0.068  | -0.308 | -0.053 | -0.174 | 0.218  | -0.014 | 0.621  | -0.016 | 0.009  | 0.040  | -0.201 |
| YDL061C   | <i>RPS29B</i> | -0.539 | -0.367 | -0.328 | -0.343 | -0.196 | -0.294 | 0.123  | -0.021 | 0.089  | 0.119  | -0.031 | -0.224 |
| YGL226C-A | <i>OST5</i>   | -0.079 | -0.293 | 0.001  | -0.189 | -0.019 | -0.046 | -0.271 | -0.117 | -0.121 | -0.178 | -0.006 | -0.343 |
| YDL012C   |               | -0.245 | -0.689 | 0.148  | -0.222 | -0.182 | -0.132 | 0.008  | -0.109 | 0.267  | 0.026  | 0.023  | -0.222 |
| YBR078W   | <i>ECM33</i>  | -0.024 | 0.092  | -0.005 | 0.506  | 0.003  | 0.181  | 0.526  | 0.494  | 0.655  | 0.376  | 0.715  | 0.420  |
| YDL029W   | <i>ARP2</i>   | 0.316  | -0.518 | -0.194 | 0.124  | 0.012  | -0.048 | 0.259  | -0.014 | 0.087  | -0.010 | 0.003  | -0.076 |
| YBR230C   |               | -0.047 | -0.333 | 0.019  | -0.229 | 0.046  | -0.042 | -0.111 | -0.138 | 0.175  | 0.045  | -0.258 | -0.236 |
| YGL178W   | <i>MPT5</i>   | 0.075  | 0.340  | -0.021 | 0.349  | 0.213  | 0.305  | -0.168 | 0.268  | -0.073 | 0.263  | -0.044 | 0.450  |
| YBR082C   | <i>UBC4</i>   | 0.068  | -0.136 | -0.260 | 0.284  | -0.059 | 0.052  | -0.118 | 0.052  | 0.040  | 0.088  | -0.189 | -0.177 |
| YFR024C-A | <i>LSB3</i>   | 0.015  | -0.355 | -0.080 | 0.201  | -0.008 | -0.163 | -0.143 | -0.008 | 0.116  | -0.090 | -0.056 | -0.242 |
| YPL075W   | <i>GCR1</i>   | -0.025 | -0.233 | -0.337 | 0.231  | -0.062 | -0.432 | -0.501 | -0.146 | 0.212  | -0.016 | -0.104 | -0.374 |
| YDR129C   | <i>SAC6</i>   | -0.257 | -0.142 | -0.056 | 0.059  | 0.083  | 0.226  | 0.156  | 0.165  | -0.114 | -0.140 | -0.034 | -0.159 |
| YCR031C   | <i>RPS14A</i> | -0.562 | -0.179 | 0.361  | -0.287 | 0.048  | -0.315 | 0.121  | -0.197 | -0.048 | -0.095 | -0.095 | -0.361 |
| YDR471W   | <i>RPL27B</i> | -0.196 | -0.108 | 0.031  | 0.025  | 0.090  | 0.087  | -0.123 | -0.084 | -0.213 | -0.429 | 0.064  | -0.383 |



|           |               |        |        |        |        |        |        |        |        |        |        |        |        |
|-----------|---------------|--------|--------|--------|--------|--------|--------|--------|--------|--------|--------|--------|--------|
| SNR17B    |               | 0.440  | 0.687  | 0.442  | 0.469  | -0.083 | 0.656  | 0.489  | 0.877  | 0.737  | 0.647  | 0.497  | 1.085  |
| YHR010W   | <i>RPL27A</i> | -0.088 | -0.208 | 0.113  | 0.064  | 0.128  | 0.050  | -0.033 | 0.209  | 0.006  | -0.259 | -0.233 | -0.306 |
| YLR367W 2 | <i>RPS22B</i> | -1.146 | -1.276 | -0.841 | -1.937 | -1.666 | -1.373 | -0.531 | -1.060 | -1.576 | -1.318 | -1.432 | -2.081 |
| YNL302C   | <i>RPS19B</i> | 0.057  | -0.141 | -0.183 | 0.032  | 0.199  | -0.009 | 0.216  | 0.470  | 0.029  | -0.023 | 0.080  | -0.028 |

TABLE S4 Shared transcripts between *nab2-C>A<sub>5-7</sub>* and *nab2-ΔN* on splicing array.

| Shared Between <i>nab2-C&gt;A<sub>5-7</sub></i> and <i>nab2-ΔN</i> | Exclusive to <i>nab2-C&gt;A<sub>5-7</sub></i> | Exclusive to <i>nab2-ΔN</i> |
|--------------------------------------------------------------------|-----------------------------------------------|-----------------------------|
| YGL103W                                                            | YNL069C                                       | SNR17B                      |
| SNR17A                                                             | YGL087C                                       | YNL301C                     |
| YGL076C                                                            | YHR077C                                       | YPL090C                     |
| YBL092W                                                            | YGL031C                                       | YPR028W                     |
| YGL030W                                                            | YDL136W                                       | YDR381W                     |
| YPL081W                                                            | YGL178W                                       | YPL143W                     |
| YFL034C-A                                                          | YGL137W                                       | YML056C                     |
| YJL191W                                                            | YCR097W 2                                     | YHR041C                     |
| YOL127W                                                            | YPL031C                                       | YBR186W                     |
| YPL079W                                                            | YBL059W                                       | YLR061W                     |
| YNL112W                                                            | YDR025W                                       | YBR048W                     |
| YLR048W                                                            | YHR010W                                       | YOR182C                     |
| YGL187C                                                            | YHR079C-A                                     | YDR447C                     |
| YOR096W                                                            | YBR219C                                       | YKL186C 3                   |
| YBL027W                                                            | YKL190W                                       | YDL061C                     |
| YDL075W                                                            | YCR028C-A                                     | YBR255C-A                   |
| YKL006W                                                            | YML094W                                       | YBL087C                     |
| YML026C                                                            | YDL108W                                       | YHR039C-A                   |
| YDL082W                                                            | YHR097C                                       | YNL044W                     |
| YKL081W                                                            | YJL041W                                       | YML067C                     |
| YLR406C                                                            | YOL121C                                       | YDL115C                     |
| YGL076C 2                                                          | YLR185W                                       | YER074W-A                   |
| YNL096C                                                            | YLR306W                                       | YJL205C-A                   |
| YJL189W                                                            | YOL048C                                       | YIL004C                     |
| YDL191W                                                            | YDR471W                                       | YOR293W                     |
| YIL111W                                                            | YPR187W                                       | YBL018C                     |
| YPL249C-A                                                          | YMR142C                                       | YHR101C                     |
| YHR203C                                                            | YKL186C                                       | YPL175W                     |
| YIL069C                                                            | YNL012W                                       | YDR367W                     |
| YMR143W                                                            | YER044C-A                                     | YDR450W                     |
| YLR367W                                                            | YML025C                                       | YHR021C                     |
| YIL018W                                                            | YLR128W                                       | YFL039C                     |
| YPR043W                                                            | YBR230C                                       | YDL012C                     |
| YKL002W                                                            | YER133W                                       |                             |
| YMR116C                                                            | YER093C-A                                     |                             |
| YGR027C                                                            | YGR001C                                       |                             |
| YER117W                                                            | YDR424C 2                                     |                             |
| YBR189W                                                            | YDR064W                                       |                             |
| YNL302C                                                            | YGR029W                                       |                             |
| YOR122C                                                            | YML124C                                       |                             |
| YGR118W                                                            | YNL312W                                       |                             |
| YDL083C                                                            | YDR305C                                       |                             |
| YBR181C                                                            | YMR033W                                       |                             |

|           |           |  |
|-----------|-----------|--|
| YER074W   | YDR005C   |  |
| YJR145C   | YDL219W   |  |
| YBL091C-A | YFL034C-B |  |
| YML073C   | YER179W   |  |
| YPR132W   | YLR275W   |  |
| YNL265C   | YML034W   |  |
| YOR234C   | YHR016C   |  |
| YHR123W   |           |  |
| YMR194W   |           |  |
| YIL133C   |           |  |
| YGL033W   |           |  |
| YBR191W   |           |  |
| YGR148C   |           |  |
| YLR333C   |           |  |
| YKL180W   |           |  |
| YGR214W   |           |  |
| YIL052C   |           |  |
| YKL006C-A |           |  |
| YHL001W   |           |  |
| YBL050W   |           |  |
| YHR141C   |           |  |
| YMR230W   |           |  |
| YDL189W   |           |  |
| YJL136C   |           |  |
| YLR388W   |           |  |
| YDR129C   |           |  |
| YKL186C_5 |           |  |
| YKR057W   |           |  |
| YAL030W   |           |  |
| YER056C-A |           |  |
| YBR084C-A |           |  |
| YML024W   |           |  |
| YOL120C   |           |  |
| YIL148W   |           |  |
| YGL251C   |           |  |
| YPL198W   |           |  |
| YGR183C   |           |  |
| YJL024C   |           |  |
| YBL072C   |           |  |
| YOR312C   |           |  |
| YJR094W-A |           |  |
| YOL047C   |           |  |
| YCR031C   |           |  |
| YDL130W   |           |  |
| YEL012W   |           |  |
| YFR032C-A |           |  |
| YGR225W   |           |  |

|           |  |  |
|-----------|--|--|
| YIL106W   |  |  |
| YER131W   |  |  |
| YNL162W   |  |  |
| YJL177W   |  |  |
| YKR094C   |  |  |
| YLR448W   |  |  |
| YDL029W   |  |  |
| YLR287C-A |  |  |
| YDR500C   |  |  |
| YPL241C   |  |  |
| YBR078W   |  |  |

**TABLE S5** Transcripts validated from splicing array by qRT-PCR

| <b>Transcripts</b>    | <b>Microarray</b> | <b>qRT-PCR</b> |
|-----------------------|-------------------|----------------|
| <i>ACT1</i> Intron    | 1.34              | 1.17           |
| <i>ACT1</i> Mature    | 1.95              | 1.01           |
| <i>ACT1</i> Exon      | 1.24              | 0.58           |
| <i>TUB1</i> Intron    | 0.87              | 0.84           |
| <i>TUB1</i> Mature    | 1.26              | 0.94           |
| <i>TUB1</i> Exon      | 1.16              | 0.66           |
| <i>SNR17A</i> Intron  | 2.24              | 2.30           |
| <i>SNR17A</i> Mature  | 2.12              | 2.72           |
| <i>SNR17A</i> Exon    | 2.19              | 2.41           |
| <i>RPL7B</i> Intron   | 1.09              | 0.68           |
| <i>RPL7B</i> Mature 1 | 0.38              | 0.25           |
| <i>RPL7B</i> Mature 2 | 0.77              | 0.74           |
| <i>RPL7B</i> Exon     | 0.3               | 0.82           |
| <i>DYN2</i> Intron 1  | 1.1               | 1.55           |
| <i>DYN2</i> Intron 2  | 0.96              | 1.28           |
| <i>DYN2</i> Mature 2  | 1.46              | 1.21           |
| <i>DYN2</i> Exon      | 0.87              | 0.94           |
| <i>RPL32</i> Intron   | 1.39              | 1.37           |
| <i>RPL32</i> Exon     | 0.98              | 2.02           |
| <i>NOG2</i> Intron    | 1.16              | 1.96           |
| <i>NOG2</i> Exon      | 0.58              | 0.81           |
| <i>RPS30A</i> Exon    | 0.82              | 1.10           |
