# Supplementary material
Source: PubMed Central journal article supplement (PMC5064217)
Supplement: MCB.00402-16_zmb999101333so2.pdf [file MCB.00402-16_zmb999101333so2.pdf]

**TABLE S6** Proteins identified in ZC3H14 mass spectrometry.

| Group | Gene ID      | Gene         | Protein ID     | Tot<br>Pep |       | TP<br>kevin<br>_pi | SC<br>kevin<br>_pi | TP<br>kevin<br>_zc | SC<br>kevin_<br>zc | Description                                                                                | Mass<br>(kD) |
|-------|--------------|--------------|----------------|------------|-------|--------------------|--------------------|--------------------|--------------------|--------------------------------------------------------------------------------------------|--------------|
| 1.2   | GI:37537522  | Eppk1        | NP_659097.2    | <u>2</u>   | -6.64 | 0                  | 0                  | <u>2</u>           | 2                  | epiplakin [Mus musculus]                                                                   | 724          |
| 66.1  | GI:21311925  | Ampd2        | NP_083055.1    | <u>20</u>  | -6.64 | 0                  | 0                  | <u>18</u>          | 22                 | AMP deaminase 2 [Mus musculus]                                                             | 92           |
| 70.1  | GI:231570586 | Zc3h14       | NP_083610.2    | <u>20</u>  | -6.64 | 0                  | 0                  | <u>16</u>          | 20                 | zinc finger CCCH domain-containing protein 14 isoform a [Mus musculus]                     | 82           |
| 95.1  | GI:125656163 | Thoc2        | NP_001028594.1 | <u>17</u>  | -6.64 | 0                  | 0                  | <u>14</u>          | 14                 | THO complex subunit 2 [Mus musculus]                                                       | 183          |
| 100.1 | GI:124378037 | Son          | NP_064357.2    | <u>17</u>  | -6.64 | 0                  | 0                  | <u>12</u>          | 14                 | protein SON truncated isoform [Mus musculus]                                               | 230          |
| 143.2 | GI:226246667 | Dhx16        | NP_081263.2    | <u>2</u>   | -6.64 | 0                  | 0                  | <u>2</u>           | 2                  | DEAH (Asp-Glu-Ala-His) box polypeptide 16 [Mus musculus]                                   | 119          |
| 156.2 | GI:31982833  | Pip5k1a      | NP_032873.2    | <u>3</u>   | -6.64 | 0                  | 0                  | <u>2</u>           | 2                  | phosphatidylinositol 4-phosphate 5-kinase type-1 alpha [Mus musculus]                      | 60           |
| 178.1 | GI:7709986   | Uba2         | NP_057891.1    | <u>12</u>  | -6.64 | 0                  | 0                  | <u>9</u>           | 9                  | SUMO-activating enzyme subunit 2 [Mus musculus]                                            | 71           |
| 223.1 | GI:390608665 | Pnpla6       | NP_001116290.2 | <u>11</u>  | -6.64 | 0                  | 0                  | <u>4</u>           | 4                  | neuropathy target esterase isoform 1 [Mus musculus]                                        | 149          |
| 226.1 | GI:171460910 | U2surp       | NP_001108449.1 | <u>11</u>  | -6.64 | 0                  | 0                  | <u>10</u>          | 10                 | U2 snRNP-associated SURP motif-containing protein isoform 1 [Mus musculus]                 | 118          |
| 232.1 | GI:47059073  | Thbs1        | NP_035710.2    | <u>10</u>  | -6.64 | 0                  | 0                  | <u>6</u>           | 6                  | thrombospondin-1 precursor [Mus musculus]                                                  | 130          |
| 340.1 | GI:110347502 | Fam171a<br>2 | NP_954670.2    | <u>8</u>   | -6.64 | 0                  | 0                  | <u>8</u>           | 8                  | protein FAM171A2 precursor [Mus musculus]                                                  | 87           |
| 388.1 | GI:23956332  | Thoc1        | NP_705780.1    | <u>7</u>   | -6.64 | 0                  | 0                  | <u>7</u>           | 8                  | THO complex subunit 1 [Mus musculus]                                                       | 75           |
| 409.1 | GI:112420990 | Pnn          | NP_032917.2    | <u>7</u>   | -6.64 | 0                  | 0                  | <u>5</u>           | 6                  | pinin [Mus musculus]                                                                       | 82           |
| 415.1 | GI:171543899 | Plxna4       | NP_786926.2    | <u>7</u>   | -6.64 | 0                  | 0                  | <u>6</u>           | 6                  | plexin-A4 precursor [Mus musculus]                                                         | 212          |
| 433.1 | GI:41152239  | Mprip        | NP_957697.1    | <u>7</u>   | -6.64 | 0                  | 0                  | <u>3</u>           | 3                  | myosin phosphatase Rho-interacting protein isoform 1 [Mus musculus]                        | 118          |
| 455.1 | GI:6678143   | Ssb          | NP_033304.1    | <u>6</u>   | -6.64 | 0                  | 0                  | <u>6</u>           | 6                  | lupus La protein homolog [Mus musculus]                                                    | 48           |
| 457.1 | GI:56605680  | Thoc6        | NP_001008425.1 | <u>6</u>   | -6.64 | 0                  | 0                  | <u>6</u>           | 6                  | THO complex subunit 6 homolog [Mus musculus]                                               | 37           |
| 470.1 | GI:20270267  | Sdpr         | NP_620080.1    | <u>6</u>   | -6.64 | 0                  | 0                  | <u>4</u>           | 4                  | serum deprivation-response protein [Mus musculus]                                          | 47           |
| 483.1 | GI:117647236 | Khdrbs3      | NP_034288.2    | <u>6</u>   | -6.64 | 0                  | 0                  | <u>5</u>           | 6                  | KH domain-containing, RNA-binding, signal transduction-associated protein 3 [Mus musculus] | 39           |
| 499.1 | GI:13384834  | Thoc7        | NP_079711.1    | <u>6</u>   | -6.64 | 0                  | 0                  | <u>5</u>           | 6                  | THO complex subunit 7 homolog isoform 1 [Mus musculus]                                     | 24           |
| 507.4 | GI:27734154  | Rab8b        | NP_775589.1    | <u>2</u>   | -6.64 | 0                  | 0                  | <u>2</u>           | 2                  | ras-related protein Rab-8B [Mus musculus]                                                  | 24           |
| 519.1 | GI:210147500 | Ccdc9        | NP_758501.2    | <u>6</u>   | -6.64 | 0                  | 0                  | <u>6</u>           | 6                  | coiled-coil domain-containing protein 9 isoform 2 [Mus musculus]                           | 62           |
| 529.1 | GI:79750409  | Tsc1         | NP_075025.2    | <u>5</u>   | -6.64 | 0                  | 0                  | <u>3</u>           | 3                  | hamartin [Mus musculus]                                                                    | 129          |
| 535.1 | GI:6755851   | Top3b        | NP_035754.1    | <u>5</u>   | -6.64 | 0                  | 0                  | <u>5</u>           | 5                  | DNA topoisomerase 3-beta-1 [Mus musculus]                                                  | 97           |
| 543.1 | GI:530585119 | Ddx46        | NP_001268984.1 | <u>5</u>   | -6.64 | 0                  | 0                  | <u>4</u>           | 5                  | probable ATP-dependent RNA helicase DDX46 [Mus musculus]                                   | 117          |

|       |              |          |                |          |              |   |   |          |          |                                                                                                  |     |
|-------|--------------|----------|----------------|----------|--------------|---|---|----------|----------|--------------------------------------------------------------------------------------------------|-----|
| 556.1 | GI:270309140 | Tpr      | NP_598541.3    | <u>5</u> | <u>-6.64</u> | 0 | 0 | <u>5</u> | <u>5</u> | nucleoprotein TPR [Mus musculus]                                                                 | 274 |
| 561.1 | GI:227116327 | Tln1     | NP_035732.2    | <u>5</u> | <u>-6.64</u> | 0 | 0 | <u>4</u> | <u>4</u> | talin-1 [Mus musculus]                                                                           | 270 |
| 588.1 | GI:124486887 | Ak5      | NP_001074746.1 | <u>5</u> | <u>-6.64</u> | 0 | 0 | <u>1</u> | <u>1</u> | adenylate kinase isoenzyme 5 [Mus musculus]                                                      | 63  |
| 611.1 | GI:111378388 | Arhgef10 | NP_766339.2    | <u>5</u> | <u>-6.64</u> | 0 | 0 | <u>4</u> | <u>4</u> | rho guanine nucleotide exchange factor 10 isoform a [Mus musculus]                               | 148 |
| 638.1 | GI:159032016 | Gigyf2   | NP_001103682.1 | <u>5</u> | <u>-6.64</u> | 0 | 0 | <u>4</u> | <u>4</u> | PERQ amino acid-rich with GYF domain-containing protein 2 isoform b [Mus musculus]               | 148 |
| 643.2 | GI:27370502  | Ppp2r2c  | NP_766582.1    | <u>2</u> | <u>-6.64</u> | 0 | 0 | <u>2</u> | <u>2</u> | serine/threonine-protein phosphatase 2A 55 kDa regulatory subunit B gamma isoform [Mus musculus] | 51  |
| 652.1 | GI:7305521   | Srr      | NP_038789.1    | <u>4</u> | <u>-6.64</u> | 0 | 0 | <u>3</u> | <u>3</u> | serine racemase [Mus musculus]                                                                   | 36  |
| 679.1 | GI:31982348  | Irf2bp1  | NP_848872.2    | <u>4</u> | <u>-6.64</u> | 0 | 0 | <u>3</u> | <u>3</u> | interferon regulatory factor 2-binding protein 1 [Mus musculus]                                  | 62  |
| 686.1 | GI:27369587  | Thoc5    | NP_766026.1    | <u>4</u> | <u>-6.64</u> | 0 | 0 | <u>3</u> | <u>3</u> | THO complex subunit 5 homolog [Mus musculus]                                                     | 79  |
| 687.1 | GI:269784644 | Zfp326   | NP_061229.2    | <u>4</u> | <u>-6.64</u> | 0 | 0 | <u>4</u> | <u>4</u> | DBIRD complex subunit ZNF326 [Mus musculus]                                                      | 65  |
| 701.1 | GI:215490074 | Sap18    | NP_033145.2    | <u>4</u> | <u>-6.64</u> | 0 | 0 | <u>3</u> | <u>4</u> | histone deacetylase complex subunit SAP18 [Mus musculus]                                         | 20  |
| 702.1 | GI:21539655  | Prpf6    | NP_598462.1    | <u>4</u> | <u>-6.64</u> | 0 | 0 | <u>3</u> | <u>3</u> | pre-mRNA-processing factor 6 [Mus musculus]                                                      | 107 |
| 706.1 | GI:19527078  | Fgg      | NP_598623.1    | <u>4</u> | <u>-6.64</u> | 0 | 0 | <u>2</u> | <u>2</u> | fibrinogen gamma chain precursor [Mus musculus]                                                  | 49  |
| 718.1 | GI:124487475 | Fam184a  | NP_001074897.1 | <u>4</u> | <u>-6.64</u> | 0 | 0 | <u>4</u> | <u>4</u> | uncharacterized protein LOC75906 [Mus musculus]                                                  | 133 |
| 719.1 | GI:124487283 | Upf2     | NP_001074601.1 | <u>4</u> | <u>-6.64</u> | 0 | 0 | <u>4</u> | <u>4</u> | regulator of nonsense transcripts 2 [Mus musculus]                                               | 147 |
| 720.1 | GI:124249351 | Itih1    | NP_032432.2    | <u>4</u> | <u>-6.64</u> | 0 | 0 | <u>3</u> | <u>3</u> | inter-alpha-trypsin inhibitor heavy chain H1 precursor [Mus musculus]                            | 101 |
| 738.2 | GI:6753966   | Gpd1     | NP_034401.1    | <u>2</u> | <u>-6.64</u> | 0 | 0 | <u>2</u> | <u>2</u> | glycerol-3-phosphate dehydrogenase [NAD(+)], cytoplasmic [Mus musculus]                          | 38  |
| 767.1 | GI:66792802  | Ampd3    | NP_033797.2    | <u>4</u> | <u>-6.64</u> | 0 | 0 | <u>2</u> | <u>2</u> | AMP deaminase 3 [Mus musculus]                                                                   | 89  |
| 783.1 | GI:237757269 | Celf2    | NP_001153764.1 | <u>4</u> | <u>-6.64</u> | 0 | 0 | <u>2</u> | <u>2</u> | CUGBP Elav-like family member 2 isoform 7 [Mus musculus]                                         | 50  |
| 793.1 | GI:9055218   | Prpf40a  | NP_061255.1    | <u>3</u> | <u>-6.64</u> | 0 | 0 | <u>2</u> | <u>2</u> | pre-mRNA-processing factor 40 homolog A [Mus musculus]                                           | 108 |
| 800.1 | GI:6755987   | Vtn      | NP_035837.1    | <u>3</u> | <u>-6.64</u> | 0 | 0 | <u>2</u> | <u>2</u> | vitronectin precursor [Mus musculus]                                                             | 55  |
| 824.1 | GI:454528546 | Zc3h11a  | NP_001263696.1 | <u>3</u> | <u>-6.64</u> | 0 | 0 | <u>3</u> | <u>3</u> | zinc finger CCCH domain-containing protein 11A [Mus musculus]                                    | 86  |
| 836.1 | GI:30519971  | Atl1     | NP_848743.1    | <u>3</u> | <u>-6.64</u> | 0 | 0 | <u>3</u> | <u>3</u> | atlastin-1 [Mus musculus]                                                                        | 63  |
| 844.1 | GI:255958202 | Tbc1d15  | NP_079982.3    | <u>3</u> | <u>-6.64</u> | 0 | 0 | <u>3</u> | <u>3</u> | TBC1 domain family member 15 [Mus musculus]                                                      | 76  |
| 859.1 | GI:21313210  | Tmx2     | NP_080144.1    | <u>3</u> | <u>-6.64</u> | 0 | 0 | <u>3</u> | <u>3</u> | thioredoxin-related transmembrane protein 2 precursor [Mus musculus]                             | 34  |
| 872.1 | GI:165932270 | Sf3a1    | NP_080451.4    | <u>3</u> | <u>-6.64</u> | 0 | 0 | <u>3</u> | <u>3</u> | splicing factor 3A subunit 1 [Mus musculus]                                                      | 88  |
| 879.1 | GI:157311641 | Lmo7     | NP_963287.2    | <u>3</u> | <u>-6.64</u> | 0 | 0 | <u>2</u> | <u>2</u> | LIM domain only 7 [Mus musculus]                                                                 | 192 |
| 885.1 | GI:13928670  | Vps35    | NP_075373.1    | <u>3</u> | <u>-6.64</u> | 0 | 0 | <u>2</u> | <u>2</u> | vacuolar protein sorting-associated protein 35 [Mus musculus]                                    | 92  |
| 900.1 | GI:124249066 | Rbm15    | NP_001039272.1 | <u>3</u> | <u>-6.64</u> | 0 | 0 | <u>2</u> | <u>2</u> | RNA binding motif protein 15 [Mus musculus]                                                      | 106 |
| 903.1 | GI:119508431 | Rogdi    | NP_573448.2    | <u>3</u> | <u>-6.64</u> | 0 | 0 | <u>2</u> | <u>2</u> | protein rogdi homolog [Mus musculus]                                                             | 32  |
| 905.1 | GI:116875858 | Acan     | NP_031450.2    | <u>3</u> | <u>-6.64</u> | 0 | 0 | <u>2</u> | <u>2</u> | aggrecan core protein precursor [Mus musculus]                                                   | 222 |

|        |              |          |                |          |              |   |   |          |   |                                                                                 |     |
|--------|--------------|----------|----------------|----------|--------------|---|---|----------|---|---------------------------------------------------------------------------------|-----|
| 911.1  | GI:6679685   | Erh      | NP_031977.1    | <u>3</u> | <u>-6.64</u> | 0 | 0 | <u>2</u> | 2 | enhancer of rudimentary homolog [Mus musculus]                                  | 12  |
| 913.1  | GI:13386338  | Rap2b    | NP_082988.1    | <u>3</u> | <u>-6.64</u> | 0 | 0 | <u>3</u> | 3 | ras-related protein Rap-2b precursor [Mus musculus]                             | 20  |
| 913.3  | GI:27369539  | Rap2c    | NP_766001.1    | <u>2</u> | <u>-6.64</u> | 0 | 0 | <u>2</u> | 2 | ras-related protein Rap-2c precursor [Mus musculus]                             | 21  |
| 914.1  | GI:13385304  | Wwp2     | NP_080106.1    | <u>3</u> | <u>-6.64</u> | 0 | 0 | <u>2</u> | 2 | NEDD4-like E3 ubiquitin-protein ligase WWP2 [Mus musculus]                      | 99  |
| 914.2  | GI:124487317 | Itch     | NP_032421.2    | <u>2</u> | <u>-6.64</u> | 0 | 0 | <u>1</u> | 1 | E3 ubiquitin-protein ligase Itchy [Mus musculus]                                | 99  |
| 927.1  | GI:9790247   | Sae1     | NP_062722.1    | <u>3</u> | <u>-6.64</u> | 0 | 0 | <u>2</u> | 3 | SUMO-activating enzyme subunit 1 isoform a [Mus musculus]                       | 39  |
| 959.1  | GI:356995866 | Ptprs    | NP_001239385.1 | <u>3</u> | <u>-6.64</u> | 0 | 0 | <u>2</u> | 2 | receptor-type tyrosine-protein phosphatase S isoform 2 precursor [Mus musculus] | 168 |
| 967.1  | GI:269973913 | Sugp2    | NP_001161762.1 | <u>3</u> | <u>-6.64</u> | 0 | 0 | <u>3</u> | 3 | SURP and G-patch domain-containing protein 2 [Mus musculus]                     | 118 |
| 975.1  | GI:213417812 | Raly     | NP_001132985.1 | <u>3</u> | <u>-6.64</u> | 0 | 0 | <u>3</u> | 3 | RNA-binding protein Raly long isoform [Mus musculus]                            | 33  |
| 983.1  | GI:12963655  | Rpl38    | NP_075861.1    | <u>3</u> | <u>-6.64</u> | 0 | 0 | <u>2</u> | 2 | 60S ribosomal protein L38 [Mus musculus]                                        | 8   |
| 985.1  | GI:124378042 | Golga2   | NP_598613.2    | <u>3</u> | <u>-6.64</u> | 0 | 0 | <u>3</u> | 3 | Golgin subfamily A member 2 isoform a [Mus musculus]                            | 116 |
| 1001.1 | GI:85701732  | Fam195b  | NP_001028403.1 | <u>2</u> | <u>-6.64</u> | 0 | 0 | <u>2</u> | 2 | protein FAM195B [Mus musculus]                                                  | 11  |
| 1003.1 | GI:84000009  | Gprin1   | NP_036144.2    | <u>2</u> | <u>-6.64</u> | 0 | 0 | <u>2</u> | 2 | G protein-regulated inducer of neurite outgrowth 1 [Mus musculus]               | 95  |
| 1007.1 | GI:74959788  | Upf3b    | NP_080849.1    | <u>2</u> | <u>-6.64</u> | 0 | 0 | <u>2</u> | 2 | regulator of nonsense transcripts 3B [Mus musculus]                             | 57  |
| 1012.1 | GI:71774133  | Ppib     | NP_035279.2    | <u>2</u> | <u>-6.64</u> | 0 | 0 | <u>2</u> | 2 | peptidyl-prolyl cis-trans isomerase B precursor [Mus musculus]                  | 24  |
| 1020.1 | GI:6755580   | Smn1     | NP_035550.1    | <u>2</u> | <u>-6.64</u> | 0 | 0 | <u>2</u> | 3 | survival motor neuron protein isoform 1 [Mus musculus]                          | 31  |
| 1021.1 | GI:6755566   | Slc9a3r1 | NP_036160.1    | <u>2</u> | <u>-6.64</u> | 0 | 0 | <u>2</u> | 2 | Na(+)/H(+) exchange regulatory cofactor NHE-RF1 [Mus musculus]                  | 39  |
| 1026.1 | GI:6754640   | Marco    | NP_034896.1    | <u>2</u> | <u>-6.64</u> | 0 | 0 | <u>2</u> | 2 | macrophage receptor MARCO [Mus musculus]                                        | 53  |
| 1037.1 | GI:6679233   | Cdk18    | NP_032821.1    | <u>2</u> | <u>-6.64</u> | 0 | 0 | <u>2</u> | 2 | cyclin-dependent kinase 18 [Mus musculus]                                       | 52  |
| 1039.1 | GI:63025208  | Ccdc88a  | NP_789811.2    | <u>2</u> | <u>-6.64</u> | 0 | 0 | <u>1</u> | 1 | girdin [Mus musculus]                                                           | 212 |
| 1049.1 | GI:41152116  | Lrrc47   | NP_957678.1    | <u>2</u> | <u>-6.64</u> | 0 | 0 | <u>2</u> | 2 | leucine-rich repeat-containing protein 47 [Mus musculus]                        | 64  |
| 1057.1 | GI:34328053  | Elavl3   | NP_034617.1    | <u>2</u> | <u>-6.64</u> | 0 | 0 | <u>2</u> | 2 | ELAV-like protein 3 [Mus musculus]                                              | 40  |
| 1063.1 | GI:31981605  | Myl4     | NP_034988.2    | <u>2</u> | <u>-6.64</u> | 0 | 0 | <u>1</u> | 1 | myosin light chain 4 [Mus musculus]                                             | 21  |
| 1064.1 | GI:31981560  | Smap2    | NP_598477.2    | <u>2</u> | <u>-6.64</u> | 0 | 0 | <u>2</u> | 2 | stromal membrane-associated protein 2 [Mus musculus]                            | 47  |
| 1066.1 | GI:31980808  | Eif3g    | NP_058572.2    | <u>2</u> | <u>-6.64</u> | 0 | 0 | <u>2</u> | 2 | eukaryotic translation initiation factor 3 subunit G [Mus musculus]             | 36  |
| 1073.1 | GI:31542626  | Hmbox1   | NP_796312.2    | <u>2</u> | <u>-6.64</u> | 0 | 0 | <u>2</u> | 2 | homeobox-containing protein 1 [Mus musculus]                                    | 47  |
| 1080.1 | GI:27883844  | Snrpe    | NP_033253.1    | <u>2</u> | <u>-6.64</u> | 0 | 0 | <u>1</u> | 2 | small nuclear ribonucleoprotein E [Mus musculus]                                | 11  |
| 1087.1 | GI:27229101  | Fam213a  | NP_081740.2    | <u>2</u> | <u>-6.64</u> | 0 | 0 | <u>1</u> | 1 | redox-regulatory protein FAM213A [Mus musculus]                                 | 24  |
| 1088.1 | GI:26986569  | Slc6a17  | NP_758475.1    | <u>2</u> | <u>-6.64</u> | 0 | 0 | <u>2</u> | 2 | sodium-dependent neutral amino acid transporter SLC6A17 [Mus musculus]          | 81  |
| 1091.1 | GI:261823995 | Pon1     | NP_035264.2    | <u>2</u> | <u>-6.64</u> | 0 | 0 | <u>2</u> | 2 | serum paraoxonase/arylesterase 1 precursor [Mus musculus]                       | 40  |
| 1092.1 | GI:257471003 | Plg      | NP_032903.3    | <u>2</u> | <u>-6.64</u> | 0 | 0 | <u>1</u> | 1 | plasminogen precursor [Mus musculus]                                            | 91  |

|        |              |         |                |          |              |   |   |          |   |                                                                                         |     |
|--------|--------------|---------|----------------|----------|--------------|---|---|----------|---|-----------------------------------------------------------------------------------------|-----|
| 1093.1 | GI:256542283 | Ccdc175 | NP_082963.1    | <u>2</u> | <u>-6.64</u> | 0 | 0 | <u>2</u> | 2 | coiled-coil domain-containing protein 175 [Mus musculus]                                | 97  |
| 1099.1 | GI:254553424 | Thoc3   | NP_082873.2    | <u>2</u> | <u>-6.64</u> | 0 | 0 | <u>1</u> | 1 | THO complex subunit 3 [Mus musculus]                                                    | 39  |
| 1106.1 | GI:254039596 | Isca2   | NP_083139.1    | <u>2</u> | <u>-6.64</u> | 0 | 0 | <u>2</u> | 2 | iron-sulfur cluster assembly 2 homolog, mitochondrial precursor [Mus musculus]          | 17  |
| 1109.1 | GI:240848573 | Dhx36   | NP_082412.2    | <u>2</u> | <u>-6.64</u> | 0 | 0 | <u>2</u> | 2 | probable ATP-dependent RNA helicase DHX36 [Mus musculus]                                | 114 |
| 1112.1 | GI:23956084  | Acadvl  | NP_059062.1    | <u>2</u> | <u>-6.64</u> | 0 | 0 | <u>2</u> | 2 | very long-chain specific acyl-CoA dehydrogenase, mitochondrial precursor [Mus musculus] | 71  |
| 1113.1 | GI:23943924  | Tubgcp4 | NP_700436.1    | <u>2</u> | <u>-6.64</u> | 0 | 0 | <u>2</u> | 2 | gamma-tubulin complex component 4 [Mus musculus]                                        | 76  |
| 1118.1 | GI:228480232 | Snrpa1  | NP_067311.4    | <u>2</u> | <u>-6.64</u> | 0 | 0 | <u>2</u> | 2 | U2 small nuclear ribonucleoprotein A' [Mus musculus]                                    | 28  |
| 1119.1 | GI:227497256 | Prpf38a | NP_766285.2    | <u>2</u> | <u>-6.64</u> | 0 | 0 | <u>2</u> | 2 | pre-mRNA-splicing factor 38A [Mus musculus]                                             | 37  |
| 1120.1 | GI:227430367 | Smu1    | NP_067510.3    | <u>2</u> | <u>-6.64</u> | 0 | 0 | <u>2</u> | 3 | WD40 repeat-containing protein SMU1 [Mus musculus]                                      | 58  |
| 1131.1 | GI:22095003  | Sf3a3   | NP_083433.1    | <u>2</u> | <u>-6.64</u> | 0 | 0 | <u>2</u> | 2 | splicing factor 3A subunit 3 [Mus musculus]                                             | 59  |
| 1142.1 | GI:21312758  | Ppp6c   | NP_077171.1    | <u>2</u> | <u>-6.64</u> | 0 | 0 | <u>2</u> | 2 | serine/threonine-protein phosphatase 6 catalytic subunit [Mus musculus]                 | 35  |
| 1148.1 | GI:198278501 | Cdc40   | NP_082155.1    | <u>2</u> | <u>-6.64</u> | 0 | 0 | <u>2</u> | 2 | pre-mRNA-processing factor 17 [Mus musculus]                                            | 65  |
| 1158.1 | GI:17505220  | Mrps21  | NP_510964.1    | <u>2</u> | <u>-6.64</u> | 0 | 0 | <u>2</u> | 2 | 28S ribosomal protein S21, mitochondrial [Mus musculus]                                 | 11  |
| 1164.1 | GI:163954948 | Khsrp   | NP_034743.3    | <u>2</u> | <u>-6.64</u> | 0 | 0 | <u>2</u> | 2 | far upstream element-binding protein 2 [Mus musculus]                                   | 77  |
| 1168.1 | GI:162287131 | Map1s   | NP_766601.2    | <u>2</u> | <u>-6.64</u> | 0 | 0 | <u>1</u> | 1 | microtubule-associated protein 1S [Mus musculus]                                        | 103 |
| 1178.1 | GI:156546892 | Prpf39  | NP_808474.2    | <u>2</u> | <u>-6.64</u> | 0 | 0 | <u>2</u> | 2 | pre-mRNA-processing factor 39 [Mus musculus]                                            | 78  |
| 1182.1 | GI:153945724 | Nptn    | NP_033171.2    | <u>2</u> | <u>-6.64</u> | 0 | 0 | <u>2</u> | 2 | neuroplastin precursor [Mus musculus]                                                   | 31  |
| 1184.1 | GI:148540073 | Ddx20   | NP_059093.3    | <u>2</u> | <u>-6.64</u> | 0 | 0 | <u>2</u> | 2 | probable ATP-dependent RNA helicase DDX20 [Mus musculus]                                | 92  |
| 1185.1 | GI:144922627 | Ncbp1   | NP_001028373.2 | <u>2</u> | <u>-6.64</u> | 0 | 0 | <u>2</u> | 2 | nuclear cap-binding protein subunit 1 [Mus musculus]                                    | 92  |
| 1187.1 | GI:13386010  | Rpl22l1 | NP_080793.1    | <u>2</u> | <u>-6.64</u> | 0 | 0 | <u>2</u> | 2 | 60S ribosomal protein L22-like 1 [Mus musculus]                                         | 14  |
| 1188.1 | GI:13385728  | Mfap1a  | NP_080496.1    | <u>2</u> | <u>-6.64</u> | 0 | 0 | <u>2</u> | 2 | microfibrillar-associated protein 1 [Mus musculus]                                      | 52  |
| 1195.1 | GI:12746424  | Dpysl5  | NP_075534.1    | <u>2</u> | <u>-6.64</u> | 0 | 0 | <u>1</u> | 1 | dihydropyrimidinase-related protein 5 [Mus musculus]                                    | 61  |
| 1196.1 | GI:126723102 | Efr3b   | NP_001075952.1 | <u>2</u> | <u>-6.64</u> | 0 | 0 | <u>2</u> | 2 | protein EFR3 homolog B [Mus musculus]                                                   | 92  |
| 1200.1 | GI:119637823 | Hnrnph3 | NP_001073293.1 | <u>2</u> | <u>-6.64</u> | 0 | 0 | <u>1</u> | 1 | heterogeneous nuclear ribonucleoprotein H3 [Mus musculus]                               | 37  |
| 1224.1 | GI:160707921 | Anxa11  | NP_038497.2    | <u>2</u> | <u>-6.64</u> | 0 | 0 | <u>2</u> | 2 | annexin A11 [Mus musculus]                                                              | 54  |
| 1227.1 | GI:9910600   | Ube2d2a | NP_064296.1    | <u>2</u> | <u>-6.64</u> | 0 | 0 | <u>2</u> | 2 | ubiquitin-conjugating enzyme E2 D2 [Mus musculus]                                       | 17  |
| 1229.1 | GI:9845295   | Rpl36a  | NP_063918.1    | <u>2</u> | <u>-6.64</u> | 0 | 0 | <u>1</u> | 1 | 60S ribosomal protein L36a [Mus musculus]                                               | 12  |
| 1231.1 | GI:94408233  | Gm7698  | XP_983012.1    | <u>2</u> | <u>-6.64</u> | 0 | 0 | <u>2</u> | 2 | PREDICTED: 40S ribosomal protein S12-like [Mus musculus]                                | 14  |
| 1234.1 | GI:85677510  | Eif4e2  | NP_001034259.1 | <u>2</u> | <u>-6.64</u> | 0 | 0 | <u>2</u> | 2 | eukaryotic translation initiation factor 4E type 2 isoform 1 [Mus musculus]             | 28  |
| 1264.1 | GI:313569872 | Apoo    | NP_001186266.1 | <u>2</u> | <u>-6.64</u> | 0 | 0 | <u>2</u> | 2 | apolipoprotein O isoform 2 [Mus musculus]                                               | 24  |
| 1271.1 | GI:285402377 | Strn3   | NP_001165569.1 | <u>2</u> | <u>-6.64</u> | 0 | 0 | <u>2</u> | 2 | striatin-3 isoform 2 [Mus musculus]                                                     | 78  |

|        |              |         |                |          |       |   |   |          |   |                                                                           |     |
|--------|--------------|---------|----------------|----------|-------|---|---|----------|---|---------------------------------------------------------------------------|-----|
| 1272.1 | GI:261878594 | Cspg5   | NP_001159745.1 | <u>2</u> | -6.64 | 0 | 0 | <u>1</u> | 1 | chondroitin sulfate proteoglycan 5 isoform b precursor [Mus musculus]     | 60  |
| 1276.1 | GI:254750658 | Cyth3   | NP_001157020.1 | <u>2</u> | -6.64 | 0 | 0 | <u>1</u> | 1 | cytohesin-3 isoform 2 [Mus musculus]                                      | 41  |
| 1281.1 | GI:226958327 | Nrxn1   | NP_796258.2    | <u>2</u> | -6.64 | 0 | 0 | <u>1</u> | 1 | neurexin-1-alpha isoform 2 precursor [Mus musculus]                       | 164 |
| 1283.1 | GI:225543378 | Cadm2   | NP_001139449.1 | <u>2</u> | -6.64 | 0 | 0 | <u>2</u> | 2 | cell adhesion molecule 2 isoform 2 precursor [Mus musculus]               | 43  |
| 1289.1 | GI:165377089 | Arhgef7 | NP_001106990.1 | <u>2</u> | -6.64 | 0 | 0 | <u>2</u> | 2 | rho guanine nucleotide exchange factor 7 isoform b [Mus musculus]         | 80  |
| 1290.1 | GI:158749580 | Pde4dip | NP_001103633.1 | <u>2</u> | -6.64 | 0 | 0 | <u>2</u> | 2 | myomegalin isoform 4 [Mus musculus]                                       | 262 |
| 1292.1 | GI:15042947  | Rpl35a  | NP_067313.2    | <u>2</u> | -6.64 | 0 | 0 | <u>2</u> | 2 | 60S ribosomal protein L35a [Mus musculus]                                 | 13  |
| 1303.1 | GI:9055204   | Dfna5   | NP_061239.1    | <u>1</u> | -6.64 | 0 | 0 | <u>1</u> | 1 | non-syndromic hearing impairment protein 5 homolog [Mus musculus]         | 57  |
| 1313.1 | GI:83921574  | Exoc4   | NP_033174.2    | <u>1</u> | -6.64 | 0 | 0 | <u>1</u> | 1 | exocyst complex component 4 [Mus musculus]                                | 110 |
| 1318.1 | GI:7710014   | Cul3    | NP_057925.1    | <u>1</u> | -6.64 | 0 | 0 | <u>1</u> | 1 | cullin-3 [Mus musculus]                                                   | 89  |
| 1327.1 | GI:70780373  | Akap8l  | NP_059504.2    | <u>1</u> | -6.64 | 0 | 0 | <u>1</u> | 1 | A-kinase anchor protein 8-like [Mus musculus]                             | 71  |
| 1328.1 | GI:70778812  | Tmem65  | NP_780421.2    | <u>1</u> | -6.64 | 0 | 0 | <u>1</u> | 1 | transmembrane protein 65 [Mus musculus]                                   | 25  |
| 1329.1 | GI:67906183  | Pla2g4d | NP_001019308.1 | <u>1</u> | -6.64 | 0 | 0 | <u>1</u> | 1 | cytosolic phospholipase A2 delta [Mus musculus]                           | 93  |
| 1331.1 | GI:6755442   | Sdc4    | NP_035651.1    | <u>1</u> | -6.64 | 0 | 0 | <u>1</u> | 1 | syndecan-4 precursor [Mus musculus]                                       | 21  |
| 1335.1 | GI:6754696   | Mif     | NP_034928.1    | <u>1</u> | -6.64 | 0 | 0 | <u>1</u> | 1 | macrophage migration inhibitory factor [Mus musculus]                     | 12  |
| 1337.1 | GI:6754164   | Hc      | NP_034536.1    | <u>1</u> | -6.64 | 0 | 0 | <u>1</u> | 1 | complement C5 preproprotein [Mus musculus]                                | 189 |
| 1346.1 | GI:6679901   | Gabra2  | NP_032092.1    | <u>1</u> | -6.64 | 0 | 0 | <u>1</u> | 1 | gamma-aminobutyric acid receptor subunit alpha-2 precursor [Mus musculus] | 51  |
| 1354.1 | GI:6679501   | Psmc1   | NP_032973.1    | <u>1</u> | -6.64 | 0 | 0 | <u>1</u> | 1 | 26S protease regulatory subunit 4 [Mus musculus]                          | 49  |
| 1360.1 | GI:6677839   | S100b   | NP_033141.1    | <u>1</u> | -6.64 | 0 | 0 | <u>1</u> | 1 | protein S100-B [Mus musculus]                                             | 11  |
| 1363.1 | GI:62899061  | Cerk    | NP_663450.3    | <u>1</u> | -6.64 | 0 | 0 | <u>1</u> | 1 | ceramide kinase [Mus musculus]                                            | 60  |
| 1368.1 | GI:58037543  | Lphn3   | NP_941991.1    | <u>1</u> | -6.64 | 0 | 0 | <u>1</u> | 1 | latrophilin-3 precursor [Mus musculus]                                    | 172 |
| 1372.1 | GI:58037395  | Scamp1  | NP_083429.1    | <u>1</u> | -6.64 | 0 | 0 | <u>1</u> | 1 | secretory carrier-associated membrane protein 1 [Mus musculus]            | 38  |
| 1376.1 | GI:58037205  | Bag5    | NP_081680.1    | <u>1</u> | -6.64 | 0 | 0 | <u>1</u> | 1 | BAG family molecular chaperone regulator 5 [Mus musculus]                 | 51  |
| 1377.1 | GI:57222238  | Bud31   | NP_001008705.1 | <u>1</u> | -6.64 | 0 | 0 | <u>1</u> | 1 | protein BUD31 homolog [Mus musculus]                                      | 12  |
| 1391.1 | GI:38259222  | Orai3   | NP_940816.1    | <u>1</u> | -6.64 | 0 | 0 | <u>1</u> | 1 | protein orai-3 [Mus musculus]                                             | 31  |
| 1399.1 | GI:345842472 | Ksr2    | NP_001108017.2 | <u>1</u> | -6.64 | 0 | 0 | <u>1</u> | 1 | kinase suppressor of Ras 2 [Mus musculus]                                 | 109 |
| 1400.1 | GI:34538608  | ND5     | NP_904338.1    | <u>1</u> | -6.64 | 0 | 0 | <u>1</u> | 1 | NADH dehydrogenase subunit 5 (mitochondrion) [Mus musculus]               | 68  |
| 1404.1 | GI:34147169  | Zfp598  | NP_898972.1    | <u>1</u> | -6.64 | 0 | 0 | <u>1</u> | 1 | zinc finger protein 598 [Mus musculus]                                    | 99  |
| 1409.1 | GI:33468857  | Hint1   | NP_032274.1    | <u>1</u> | -6.64 | 0 | 0 | <u>1</u> | 1 | histidine triad nucleotide-binding protein 1 [Mus musculus]               | 14  |
| 1410.1 | GI:33239431  | Rcc2    | NP_776292.1    | <u>1</u> | -6.64 | 0 | 0 | <u>1</u> | 1 | protein RCC2 [Mus musculus]                                               | 56  |
| 1417.1 | GI:31712002  | Edc4    | NP_853625.1    | <u>1</u> | -6.64 | 0 | 0 | <u>1</u> | 1 | enhancer of mRNA-decapping protein 4 [Mus musculus]                       | 151 |
| 1418.1 | GI:31560737  | Adss    | NP_031448.2    | <u>1</u> | -6.64 | 0 | 0 | <u>1</u> | 1 | adenylosuccinate synthetase isozyme 2 [Mus                                | 50  |



|        |              |               |                |          |       |   |   |          |   |                                                                                                                    |     |
|--------|--------------|---------------|----------------|----------|-------|---|---|----------|---|--------------------------------------------------------------------------------------------------------------------|-----|
|        |              |               |                |          |       |   |   |          |   | musculus]                                                                                                          |     |
| 1419.1 | GI:31560618  | Bub3          | NP_033904.2    | <u>1</u> | -6.64 | 0 | 0 | <u>1</u> | 1 | mitotic checkpoint protein BUB3 [Mus musculus]                                                                     | 37  |
| 1421.1 | GI:31560391  | Pdcd10        | NP_062719.2    | <u>1</u> | -6.64 | 0 | 0 | <u>1</u> | 1 | programmed cell death protein 10 [Mus musculus]                                                                    | 25  |
| 1425.1 | GI:31542385  | Chek1         | NP_031717.2    | <u>1</u> | -6.64 | 0 | 0 | <u>1</u> | 1 | serine/threonine-protein kinase Chk1 [Mus musculus]                                                                | 54  |
| 1427.1 | GI:30794464  | Prpf38b       | NP_080121.1    | <u>1</u> | -6.64 | 0 | 0 | <u>1</u> | 1 | pre-mRNA-splicing factor 38B [Mus musculus]                                                                        | 64  |
| 1429.1 | GI:30794164  | Cltb          | NP_083146.1    | <u>1</u> | -6.64 | 0 | 0 | <u>1</u> | 1 | clathrin light chain B [Mus musculus]                                                                              | 23  |
| 1430.1 | GI:30725780  | Mal2          | NP_849251.1    | <u>1</u> | -6.64 | 0 | 0 | <u>1</u> | 1 | protein MAL2 [Mus musculus]                                                                                        | 19  |
| 1434.1 | GI:30424918  | Epm2aip<br>1  | NP_780475.1    | <u>1</u> | -6.64 | 0 | 0 | <u>1</u> | 1 | EPM2A-interacting protein 1 [Mus musculus]                                                                         | 70  |
| 1438.1 | GI:28893281  | Ccdc158       | NP_796204.1    | <u>1</u> | -6.64 | 0 | 0 | <u>1</u> | 1 | coiled-coil domain-containing protein 158 [Mus musculus]                                                           | 127 |
| 1448.1 | GI:27552760  | Tomm70a       | NP_613065.2    | <u>1</u> | -6.64 | 0 | 0 | <u>1</u> | 1 | mitochondrial import receptor subunit TOM70 [Mus musculus]                                                         | 68  |
| 1452.1 | GI:27228990  | Snrnp27       | NP_079941.1    | <u>1</u> | -6.64 | 0 | 0 | <u>1</u> | 1 | U4/U6.U5 small nuclear ribonucleoprotein 27 kDa protein [Mus musculus]                                             | 19  |
| 1460.1 | GI:257196228 | Maob          | NP_766366.2    | <u>1</u> | -6.64 | 0 | 0 | <u>1</u> | 1 | amine oxidase [flavin-containing] B [Mus musculus]                                                                 | 59  |
| 1461.1 | GI:257153448 | Pcsk1n        | NP_038920.2    | <u>1</u> | -6.64 | 0 | 0 | <u>1</u> | 1 | proSAAS precursor [Mus musculus]                                                                                   | 27  |
| 1463.1 | GI:256773180 | Rab11fip<br>2 | NP_001028344.2 | <u>1</u> | -6.64 | 0 | 0 | <u>1</u> | 1 | rab11 family-interacting protein 2 isoform 1 [Mus musculus]                                                        | 60  |
| 1466.1 | GI:254692890 | Zfp558        | NP_083211.1    | <u>1</u> | -6.64 | 0 | 0 | <u>1</u> | 1 | zinc finger protein 558 [Mus musculus]                                                                             | 46  |
| 1469.1 | GI:254553310 | Micall2       | NP_777275.2    | <u>1</u> | -6.64 | 0 | 0 | <u>1</u> | 1 | MICAL-like protein 2 [Mus musculus]                                                                                | 108 |
| 1473.1 | GI:253314408 | Szt2          | NP_937813.3    | <u>1</u> | -6.64 | 0 | 0 | <u>1</u> | 1 | protein SZT2 [Mus musculus]                                                                                        | 377 |
| 1474.1 | GI:24415990  | Phf5a         | NP_081013.1    | <u>1</u> | -6.64 | 0 | 0 | <u>1</u> | 1 | PHD finger-like domain-containing protein 5A [Mus musculus]                                                        | 12  |
| 1476.1 | GI:23956286  | Nrn1          | NP_705757.1    | <u>1</u> | -6.64 | 0 | 0 | <u>1</u> | 1 | neuritin precursor [Mus musculus]                                                                                  | 15  |
| 1477.1 | GI:23956110  | Snrpb2        | NP_067310.1    | <u>1</u> | -6.64 | 0 | 0 | <u>1</u> | 1 | U2 small nuclear ribonucleoprotein B" [Mus musculus]                                                               | 25  |
| 1479.1 | GI:229577278 | Smarcal1      | NP_061287.2    | <u>1</u> | -6.64 | 0 | 0 | <u>1</u> | 1 | SWI/SNF-related matrix-associated actin-dependent regulator of chromatin subfamily A-like protein 1 [Mus musculus] | 101 |
| 1483.1 | GI:227330544 | Cplx1         | NP_031782.3    | <u>1</u> | -6.64 | 0 | 0 | <u>1</u> | 1 | complexin-1 [Mus musculus]                                                                                         | 15  |
| 1488.1 | GI:226494680 | Ttc7b         | NP_001028385.1 | <u>1</u> | -6.64 | 0 | 0 | <u>1</u> | 1 | tetratricopeptide repeat domain 7B [Mus musculus]                                                                  | 94  |
| 1489.1 | GI:226052731 | Ptpn2         | NP_035345.2    | <u>1</u> | -6.64 | 0 | 0 | <u>1</u> | 1 | receptor-type tyrosine-protein phosphatase N2 precursor [Mus musculus]                                             | 111 |
| 1491.1 | GI:225543552 | Frg1          | NP_038550.2    | <u>1</u> | -6.64 | 0 | 0 | <u>1</u> | 1 | protein FRG1 [Mus musculus]                                                                                        | 29  |
| 1492.1 | GI:225543181 | Dync1li2      | NP_001013398.2 | <u>1</u> | -6.64 | 0 | 0 | <u>1</u> | 1 | cytoplasmic dynein 1 light intermediate chain 2 [Mus musculus]                                                     | 54  |
| 1507.1 | GI:21312760  | S100a16       | NP_080692.1    | <u>1</u> | -6.64 | 0 | 0 | <u>1</u> | 1 | S100 calcium binding protein A16 [Mus musculus]                                                                    | 14  |
| 1510.1 | GI:21312012  | Ndufa8        | NP_080979.1    | <u>1</u> | -6.64 | 0 | 0 | <u>1</u> | 1 | NADH dehydrogenase [ubiquinone] 1 alpha subcomplex subunit 8 [Mus musculus]                                        | 20  |
| 1511.1 | GI:213021192 | Mios          | NP_663349.2    | <u>1</u> | -6.64 | 0 | 0 | <u>1</u> | 1 | WD repeat-containing protein mio [Mus musculus]                                                                    | 98  |
| 1515.1 | GI:19527162  | Plekha1       | NP_598703.1    | <u>1</u> | -6.64 | 0 | 0 | <u>1</u> | 1 | pleckstrin homology domain-containing family A member 1 [Mus musculus]                                             | 40  |

|        |              |               |                |          |       |   |   |          |   |                                                                               |     |
|--------|--------------|---------------|----------------|----------|-------|---|---|----------|---|-------------------------------------------------------------------------------|-----|
| 1516.1 | GI:19527102  | Stx12         | NP_598648.1    | <u>1</u> | -6.64 | 0 | 0 | <u>1</u> | 1 | syntaxin-12 [Mus musculus]                                                    | 31  |
| 1517.1 | GI:19527026  | Lrrc59        | NP_598568.1    | <u>1</u> | -6.64 | 0 | 0 | <u>1</u> | 1 | leucine-rich repeat-containing protein 59 [Mus musculus]                      | 35  |
| 1520.1 | GI:194272146 | Slc30a3       | NP_035903.2    | <u>1</u> | -6.64 | 0 | 0 | <u>1</u> | 1 | zinc transporter 3 [Mus musculus]                                             | 42  |
| 1523.1 | GI:188035856 | Tmem106b      | NP_082268.2    | <u>1</u> | -6.64 | 0 | 0 | <u>1</u> | 2 | transmembrane protein 106B [Mus musculus]                                     | 31  |
| 1526.1 | GI:18079341  | Eif3h         | NP_542366.1    | <u>1</u> | -6.64 | 0 | 0 | <u>1</u> | 1 | eukaryotic translation initiation factor 3 subunit H [Mus musculus]           | 40  |
| 1528.1 | GI:17975500  | Gmpr          | NP_079784.1    | <u>1</u> | -6.64 | 0 | 0 | <u>1</u> | 1 | GMP reductase 1 [Mus musculus]                                                | 37  |
| 1529.1 | GI:172072613 | Ctps          | NP_058028.2    | <u>1</u> | -6.64 | 0 | 0 | <u>1</u> | 1 | CTP synthase 1 [Mus musculus]                                                 | 67  |
| 1537.1 | GI:16716503  | Cadm3         | NP_444429.1    | <u>1</u> | -6.64 | 0 | 0 | <u>1</u> | 1 | cell adhesion molecule 3 precursor [Mus musculus]                             | 43  |
| 1541.1 | GI:165377150 | Cntnap2       | NP_001004357.2 | <u>1</u> | -6.64 | 0 | 0 | <u>1</u> | 1 | contactin-associated protein-like 2 isoform a precursor [Mus musculus]        | 148 |
| 1544.1 | GI:160707971 | Ap3s2         | NP_033812.3    | <u>1</u> | -6.64 | 0 | 0 | <u>1</u> | 1 | AP-3 complex subunit sigma-2 [Mus musculus]                                   | 22  |
| 1549.1 | GI:160333304 | Apoa1         | NP_033822.2    | <u>1</u> | -6.64 | 0 | 0 | <u>1</u> | 1 | apolipoprotein A-1 preproprotein [Mus musculus]                               | 31  |
| 1551.1 | GI:160298168 | Gbas          | NP_032121.3    | <u>1</u> | -6.64 | 0 | 0 | <u>1</u> | 1 | protein NipSnap homolog 2 [Mus musculus]                                      | 33  |
| 1555.1 | GI:153792526 | Arl1          | NP_080135.2    | <u>1</u> | -6.64 | 0 | 0 | <u>1</u> | 1 | ADP-ribosylation factor-like protein 1 [Mus musculus]                         | 20  |
| 1560.1 | GI:148223079 | Wdr82         | NP_084172.1    | <u>1</u> | -6.64 | 0 | 0 | <u>1</u> | 1 | WD repeat-containing protein 82 [Mus musculus]                                | 35  |
| 1562.1 | GI:145699091 | Syne2         | NP_001005510.2 | <u>1</u> | -6.64 | 0 | 0 | <u>1</u> | 1 | nesprin-2 [Mus musculus]                                                      | 782 |
| 1570.1 | GI:13386056  | Ncbp2         | NP_080830.1    | <u>1</u> | -6.64 | 0 | 0 | <u>1</u> | 1 | nuclear cap-binding protein subunit 2 [Mus musculus]                          | 18  |
| 1571.1 | GI:13386054  | Arpc4         | NP_080828.1    | <u>1</u> | -6.64 | 0 | 0 | <u>1</u> | 1 | actin-related protein 2/3 complex subunit 4 isoform 1 [Mus musculus]          | 20  |
| 1573.1 | GI:13385994  | Snrpg         | NP_080782.1    | <u>1</u> | -6.64 | 0 | 0 | <u>1</u> | 1 | small nuclear ribonucleoprotein G [Mus musculus]                              | 8   |
| 1576.1 | GI:13385678  | Ergic1        | NP_080446.1    | <u>1</u> | -6.64 | 0 | 0 | <u>1</u> | 1 | endoplasmic reticulum-Golgi intermediate compartment protein 1 [Mus musculus] | 33  |
| 1577.1 | GI:13385670  | Mrps34        | NP_075749.1    | <u>1</u> | -6.64 | 0 | 0 | <u>1</u> | 1 | 28S ribosomal protein S34, mitochondrial [Mus musculus]                       | 26  |
| 1582.1 | GI:13385288  | Crnk1l        | NP_080096.1    | <u>1</u> | -6.64 | 0 | 0 | <u>1</u> | 1 | crooked neck-like protein 1 [Mus musculus]                                    | 83  |
| 1583.1 | GI:13384692  | 0610009D07Rik | NP_079599.1    | <u>1</u> | -6.64 | 0 | 0 | <u>1</u> | 1 | pre-mRNA branch site protein p14 [Mus musculus]                               | 15  |
| 1584.1 | GI:13384642  | Synj2bp       | NP_079568.1    | <u>1</u> | -6.64 | 0 | 0 | <u>1</u> | 2 | synaptojanin-2-binding protein [Mus musculus]                                 | 16  |
| 1585.1 | GI:133778992 | Kcnc3         | NP_032448.2    | <u>1</u> | -6.64 | 0 | 0 | <u>1</u> | 1 | potassium voltage-gated channel subfamily C member 3 [Mus musculus]           | 82  |
| 1586.1 | GI:133778933 | Rag1          | NP_033045.2    | <u>1</u> | -6.64 | 0 | 0 | <u>1</u> | 1 | V(D)J recombination-activating protein 1 [Mus musculus]                       | 119 |
| 1591.1 | GI:12963537  | Cwc15         | NP_075642.1    | <u>1</u> | -6.64 | 0 | 0 | <u>1</u> | 1 | spliceosome-associated protein CWC15 homolog [Mus musculus]                   | 27  |
| 1593.1 | GI:125628634 | Mast1         | NP_064329.2    | <u>1</u> | -6.64 | 0 | 0 | <u>1</u> | 1 | microtubule-associated serine/threonine-protein kinase 1 [Mus musculus]       | 171 |
| 1594.1 | GI:125347376 | Flna          | NP_034357.2    | <u>1</u> | -6.64 | 0 | 0 | <u>1</u> | 1 | filamin-A [Mus musculus]                                                      | 280 |
| 1595.1 | GI:125347372 | Gpr143        | NP_035081.3    | <u>1</u> | -6.64 | 0 | 0 | <u>1</u> | 1 | G-protein coupled receptor 143 [Mus musculus]                                 | 45  |
| 1596.1 | GI:124517716 | Slc12a2       | NP_033220.2    | <u>1</u> | -6.64 | 0 | 0 | <u>1</u> | 1 | solute carrier family 12 member 2 [Mus musculus]                              | 131 |

|        |              |               |                |          |       |   |   |          |   |                                                                                                    |     |
|--------|--------------|---------------|----------------|----------|-------|---|---|----------|---|----------------------------------------------------------------------------------------------------|-----|
| 1597.1 | GI:124487145 | 1110037F02Rik | NP_001074652.1 | <u>1</u> | -6.64 | 0 | 0 | <u>1</u> | 1 | protein virilizer homolog [Mus musculus]                                                           | 207 |
| 1598.1 | GI:124487105 | Arid4a        | NP_001074664.1 | <u>1</u> | -6.64 | 0 | 0 | <u>1</u> | 1 | AT-rich interactive domain-containing protein 4A [Mus musculus]                                    | 142 |
| 1602.1 | GI:124430549 | Ythdc1        | NP_808348.2    | <u>1</u> | -6.64 | 0 | 0 | <u>1</u> | 1 | YTH domain containing 1 [Mus musculus]                                                             | 86  |
| 1603.1 | GI:124430514 | Ddx23         | NP_001074450.1 | <u>1</u> | -6.64 | 0 | 0 | <u>1</u> | 2 | probable ATP-dependent RNA helicase DDX23 [Mus musculus]                                           | 95  |
| 1610.1 | GI:124107596 | Prkag1        | NP_058061.2    | <u>1</u> | -6.64 | 0 | 0 | <u>1</u> | 1 | 5'-AMP-activated protein kinase subunit gamma-1 [Mus musculus]                                     | 37  |
| 1614.1 | GI:118601011 | Scamp3        | NP_036016.2    | <u>1</u> | -6.64 | 0 | 0 | <u>1</u> | 1 | secretory carrier-associated membrane protein 3 [Mus musculus]                                     | 38  |
| 1619.1 | GI:115298670 | Snrnp40       | NP_079921.2    | <u>1</u> | -6.64 | 0 | 0 | <u>1</u> | 1 | U5 small nuclear ribonucleoprotein 40 kDa protein [Mus musculus]                                   | 39  |
| 1628.1 | GI:110625952 | Ccsap         | NP_082812.1    | <u>1</u> | -6.64 | 0 | 0 | <u>1</u> | 1 | centriole, cilia and spindle-associated protein [Mus musculus]                                     | 28  |
| 1629.1 | GI:10946678  | Drg2          | NP_067329.1    | <u>1</u> | -6.64 | 0 | 0 | <u>1</u> | 1 | developmentally-regulated GTP-binding protein 2 [Mus musculus]                                     | 41  |
| 1631.1 | GI:10190660  | Tfip11        | NP_061253.2    | <u>1</u> | -6.64 | 0 | 0 | <u>1</u> | 1 | tuftelin-interacting protein 11 [Mus musculus]                                                     | 96  |
| 1634.1 | GI:9910556   | Sumo3         | NP_064313.1    | <u>1</u> | -6.64 | 0 | 0 | <u>1</u> | 1 | small ubiquitin-related modifier 3 precursor [Mus musculus]                                        | 12  |
| 1636.1 | GI:9790015   | Tmed2         | NP_062744.1    | <u>1</u> | -6.64 | 0 | 0 | <u>1</u> | 1 | transmembrane emp24 domain-containing protein 2 precursor [Mus musculus]                           | 23  |
| 1639.1 | GI:87162464  | Hdac2         | NP_032255.2    | <u>1</u> | -6.64 | 0 | 0 | <u>1</u> | 1 | histone deacetylase 2 [Mus musculus]                                                               | 55  |
| 1640.1 | GI:84781725  | Nhp211        | NP_035612.2    | <u>1</u> | -6.64 | 0 | 0 | <u>1</u> | 1 | NHP2-like protein 1 [Mus musculus]                                                                 | 14  |
| 1650.1 | GI:7305509   | Snrpn         | NP_038698.1    | <u>1</u> | -6.64 | 0 | 0 | <u>1</u> | 1 | small nuclear ribonucleoprotein-associated protein N [Mus musculus]                                | 25  |
| 1657.1 | GI:70909327  | Cops2         | NP_034069.2    | <u>1</u> | -6.64 | 0 | 0 | <u>1</u> | 1 | COP9 signalosome complex subunit 2 isoform b [Mus musculus]                                        | 52  |
| 1658.1 | GI:68533251  | Tmem33        | NP_084384.1    | <u>1</u> | -6.64 | 0 | 0 | <u>1</u> | 1 | transmembrane protein 33 isoform 2 [Mus musculus]                                                  | 28  |
| 1660.1 | GI:6756051   | Zfp207        | NP_035881.1    | <u>1</u> | -6.64 | 0 | 0 | <u>1</u> | 1 | zinc finger protein 207 isoform 4 [Mus musculus]                                                   | 49  |
| 1665.1 | GI:6753598   | Dad1          | NP_034145.1    | <u>1</u> | -6.64 | 0 | 0 | <u>1</u> | 1 | dolichyl-diphosphooligosaccharide--protein glycosyltransferase subunit DAD1 [Mus musculus]         | 12  |
| 1666.1 | GI:6753210   | Btrc          | NP_033901.1    | <u>1</u> | -6.64 | 0 | 0 | <u>1</u> | 1 | F-box/WD repeat-containing protein 1A isoform b [Mus musculus]                                     | 65  |
| 1668.1 | GI:6680139   | Gyk           | NP_032220.1    | <u>1</u> | -6.64 | 0 | 0 | <u>1</u> | 1 | glycerol kinase isoform 1 [Mus musculus]                                                           | 57  |
| 1671.1 | GI:6679243   | Pde1b         | NP_032826.1    | <u>1</u> | -6.64 | 0 | 0 | <u>1</u> | 1 | calcium/calmodulin-dependent 3',5'-cyclic nucleotide phosphodiesterase 1B isoform 1 [Mus musculus] | 61  |
| 1672.1 | GI:6678696   | Llgl1         | NP_032528.1    | <u>1</u> | -6.64 | 0 | 0 | <u>1</u> | 1 | lethal(2) giant larvae protein homolog 1 isoform 2 [Mus musculus]                                  | 112 |
| 1685.1 | GI:47059049  | Slc39a14      | NP_659057.2    | <u>1</u> | -6.64 | 0 | 0 | <u>1</u> | 1 | zinc transporter ZIP14 isoform b precursor [Mus musculus]                                          | 54  |
| 1688.1 | GI:42476150  | Pcdh10        | NP_035173.2    | <u>1</u> | -6.64 | 0 | 0 | <u>1</u> | 1 | protocadherin 10 isoform 4 precursor [Mus musculus]                                                | 97  |
| 1689.1 | GI:410812207 | Dapk3         | NP_001177403.2 | <u>1</u> | -6.64 | 0 | 0 | <u>1</u> | 1 | death-associated protein kinase 3 isoform a [Mus musculus]                                         | 53  |
| 1690.1 | GI:409191597 | Dnajc5        | NP_001258514.1 | <u>1</u> | -6.64 | 0 | 0 | <u>1</u> | 1 | dnaJ homolog subfamily C member 5 [Mus musculus]                                                   | 22  |
| 1698.1 | GI:359465599 | Fibp          | NP_001240761.1 | <u>1</u> | -6.64 | 0 | 0 | <u>1</u> | 1 | acidic fibroblast growth factor intracellular-binding protein isoform 1 [Mus musculus]             | 42  |
| 1699.1 | GI:359465533 | Elp3          | NP_001240741.1 | <u>1</u> | -6.64 | 0 | 0 | <u>1</u> | 1 | elongator complex protein 3 isoform 1 [Mus musculus]                                               | 64  |



|        |              |                   |                |           |       |          |   |           |    |                                                                                  |     |
|--------|--------------|-------------------|----------------|-----------|-------|----------|---|-----------|----|----------------------------------------------------------------------------------|-----|
| 1702.1 | GI:34328113  | Epha4             | NP_031962.2    | <u>1</u>  | -6.64 | 0        | 0 | <u>1</u>  | 1  | ephrin type-A receptor 4 precursor [Mus musculus]                                | 110 |
| 1703.1 | GI:33636693  | Plekha6           | NP_891846.1    | <u>1</u>  | -6.64 | 0        | 0 | <u>1</u>  | 1  | pleckstrin homology domain-containing family A member 6 isoform 1 [Mus musculus] | 131 |
| 1705.1 | GI:33468931  | Sars              | NP_035449.1    | <u>1</u>  | -6.64 | 0        | 0 | <u>1</u>  | 1  | serine--tRNA ligase, cytoplasmic isoform 1 [Mus musculus]                        | 61  |
| 1706.1 | GI:32129201  | Dsg1b             | NP_859010.1    | <u>1</u>  | -6.64 | 0        | 0 | <u>1</u>  | 1  | desmoglein-1-beta precursor [Mus musculus]                                       | 114 |
| 1708.1 | GI:31981350  | Fam49a            | NP_084034.2    | <u>1</u>  | -6.64 | 0        | 0 | <u>1</u>  | 1  | protein FAM49A [Mus musculus]                                                    | 37  |
| 1710.1 | GI:313851007 | Fkbp8             | NP_001186560.1 | <u>1</u>  | -6.64 | 0        | 0 | <u>1</u>  | 1  | peptidyl-prolyl cis-trans isomerase FKBP8 isoform a [Mus musculus]               | 44  |
| 1711.1 | GI:312839886 | Kcnip4            | NP_001186174.1 | <u>1</u>  | -6.64 | 0        | 0 | <u>1</u>  | 1  | Kv channel-interacting protein 4 isoform 6 [Mus musculus]                        | 27  |
| 1714.1 | GI:30519977  | Raly1             | NP_848746.1    | <u>1</u>  | -6.64 | 0        | 0 | <u>1</u>  | 1  | RNA-binding Raly-like protein isoform a [Mus musculus]                           | 32  |
| 1718.1 | GI:295390633 | Asph              | NP_001171327.1 | <u>1</u>  | -6.64 | 0        | 0 | <u>1</u>  | 1  | aspartyl/asparaginyl beta-hydroxylase isoform 10 [Mus musculus]                  | 22  |
| 1723.1 | GI:268370061 | Ccdc132           | NP_001161223.1 | <u>1</u>  | -6.64 | 0        | 0 | <u>1</u>  | 1  | coiled-coil domain-containing protein 132 isoform 3 [Mus musculus]               | 108 |
| 1724.1 | GI:262231846 | Bcas3             | NP_001160115.1 | <u>1</u>  | -6.64 | 0        | 0 | <u>1</u>  | 1  | breast carcinoma-amplified sequence 3 homolog isoform b [Mus musculus]           | 99  |
| 1725.1 | GI:261823968 | Zfml              | NP_001159843.1 | <u>1</u>  | -6.64 | 0        | 0 | <u>1</u>  | 1  | zinc finger protein 638 isoform 2 [Mus musculus]                                 | 142 |
| 1729.1 | GI:256985205 | Dap3              | NP_001158005.1 | <u>1</u>  | -6.64 | 0        | 0 | <u>1</u>  | 1  | 28S ribosomal protein S29, mitochondrial isoform 1 [Mus musculus]                | 42  |
| 1734.1 | GI:254675238 | Kif9              | NP_001157041.1 | <u>1</u>  | -6.64 | 0        | 0 | <u>1</u>  | 1  | kinesin-like protein KIF9 isoform 1 [Mus musculus]                               | 92  |
| 1735.1 | GI:254587908 | S100a14           | NP_001156997.1 | <u>1</u>  | -6.64 | 0        | 0 | <u>1</u>  | 1  | protein S100-A14 isoform a [Mus musculus]                                        | 12  |
| 1738.1 | GI:247270076 | Gab2              | NP_001155949.1 | <u>1</u>  | -6.64 | 0        | 0 | <u>1</u>  | 1  | GRB2-associated-binding protein 2 isoform 2 [Mus musculus]                       | 73  |
| 1741.1 | GI:22779918  | Purg              | NP_690034.1    | <u>1</u>  | -6.64 | 0        | 0 | <u>1</u>  | 1  | purine-rich element-binding protein gamma isoform a [Mus musculus]               | 40  |
| 1742.1 | GI:226371684 | Adar              | NP_001033676.2 | <u>1</u>  | -6.64 | 0        | 0 | <u>1</u>  | 1  | double-stranded RNA-specific adenosine deaminase isoform 2 [Mus musculus]        | 103 |
| 1749.1 | GI:187831285 | Snx16             | NP_083344.3    | <u>1</u>  | -6.64 | 0        | 0 | <u>1</u>  | 1  | sorting nexin-16 isoform a [Mus musculus]                                        | 39  |
| 1750.1 | GI:170014746 | 2310035C<br>23Rik | NP_083625.1    | <u>1</u>  | -6.64 | 0        | 0 | <u>1</u>  | 1  | lisH domain and HEAT repeat-containing protein KIAA1468 isoform 2 [Mus musculus] | 132 |
| 1752.1 | GI:167830464 | Stxbp5l           | NP_001108085.1 | <u>1</u>  | -6.64 | 0        | 0 | <u>1</u>  | 1  | syntaxin-binding protein 5-like isoform m [Mus musculus]                         | 126 |
| 1753.1 | GI:167466245 | Nedd4l            | NP_001107858.1 | <u>1</u>  | -6.64 | 0        | 0 | <u>1</u>  | 1  | E3 ubiquitin-protein ligase NEDD4-like isoform 1 [Mus musculus]                  | 112 |
| 1756.1 | GI:160707947 | Sfl               | NP_001104261.1 | <u>1</u>  | -6.64 | 0        | 0 | <u>1</u>  | 1  | splicing factor 1 isoform 1 [Mus musculus]                                       | 68  |
| 1760.1 | GI:148222073 | Srsf11            | NP_001087221.1 | <u>1</u>  | -6.64 | 0        | 0 | <u>1</u>  | 1  | splicing factor, arginine/serine-rich 11 isoform 2 [Mus musculus]                | 57  |
| 230.1  | GI:6679567   | Ptrf              | NP_033012.1    | <u>10</u> | -3.32 | <u>1</u> | 1 | <u>8</u>  | 10 | polymerase I and transcript release factor [Mus musculus]                        | 44  |
| 304.1  | GI:86476054  | Vgf               | NP_001034474.1 | <u>8</u>  | -3.00 | <u>1</u> | 1 | <u>8</u>  | 8  | VGF nerve growth factor inducible precursor [Mus musculus]                       | 68  |
| 506.1  | GI:6754616   | Magoh             | NP_034890.1    | <u>6</u>  | -3.00 | <u>1</u> | 1 | <u>6</u>  | 8  | protein mago nashi homolog [Mus musculus]                                        | 17  |
| 331.1  | GI:161353449 | Rbm25             | NP_081625.3    | <u>8</u>  | -2.81 | <u>1</u> | 1 | <u>7</u>  | 7  | RNA-binding protein 25 [Mus musculus]                                            | 99  |
| 645.1  | GI:9506945   | Pabpn1            | NP_062275.1    | <u>4</u>  | -2.81 | <u>1</u> | 1 | <u>4</u>  | 7  | polyadenylate-binding protein 2 [Mus musculus]                                   | 32  |
| 24.1   | GI:115583687 | Prpf8             | NP_619600.2    | <u>32</u> | -2.63 | <u>5</u> | 5 | <u>28</u> | 31 | pre-mRNA-processing-splicing factor 8 [Mus musculus]                             | 273 |

|       |              |          |                |    |       |   |   |    |    |                                                                                                 |     |
|-------|--------------|----------|----------------|----|-------|---|---|----|----|-------------------------------------------------------------------------------------------------|-----|
| 360.1 | GI:472339106 | Ilf3     | NP_001264250.1 | 8  | -2.58 | 1 | 1 | 6  | 6  | interleukin enhancer-binding factor 3 isoform 5 [Mus musculus]                                  | 97  |
| 176.1 | GI:146231985 | Acin1    | NP_075679.2    | 13 | -2.32 | 3 | 3 | 11 | 15 | apoptotic chromatin condensation inducer in the nucleus isoform 2 [Mus musculus]                | 151 |
| 302.1 | GI:31541947  | Fyttd1   | NP_081502.2    | 9  | -2.32 | 1 | 1 | 5  | 5  | UAP56-interacting factor isoform 1 [Mus musculus]                                               | 36  |
| 438.1 | GI:256665245 | Cpsf7    | NP_001157744.1 | 7  | -2.32 | 1 | 1 | 5  | 5  | cleavage and polyadenylation specificity factor subunit 7 isoform 2 [Mus musculus]              | 51  |
| 514.1 | GI:327365322 | U2af2    | NP_001192160.1 | 6  | -2.32 | 1 | 1 | 5  | 5  | splicing factor U2AF 65 kDa subunit isoform 1 [Mus musculus]                                    | 53  |
| 600.1 | GI:6754994   | Pcbp1    | NP_035995.1    | 5  | -2.32 | 1 | 1 | 5  | 5  | poly(rC)-binding protein 1 [Mus musculus]                                                       | 37  |
| 125.1 | GI:183396774 | Bckdha   | NP_031559.3    | 15 | -2.22 | 3 | 3 | 13 | 14 | 2-oxoisovalerate dehydrogenase subunit alpha, mitochondrial [Mus musculus]                      | 51  |
| 157.2 | GI:218505708 | Gm8994   | NP_001136206.1 | 13 | -2.00 | 4 | 4 | 13 | 16 | predicted gene, EG668137 [Mus musculus]                                                         | 47  |
| 426.1 | GI:75992917  | Acsl6    | NP_001028771.1 | 7  | -2.00 | 2 | 2 | 7  | 8  | long-chain-fatty-acid--CoA ligase 6 isoform 4 [Mus musculus]                                    | 78  |
| 429.1 | GI:65301464  | Asap1    | NP_034156.2    | 7  | -2.00 | 1 | 1 | 4  | 4  | arF-GAP with SH3 domain, ANK repeat and PH domain-containing protein 1 isoform a [Mus musculus] | 127 |
| 531.1 | GI:78214312  | Atp5f1   | NP_033855.2    | 5  | -2.00 | 2 | 2 | 4  | 8  | ATP synthase F(0) complex subunit B1, mitochondrial precursor [Mus musculus]                    | 29  |
| 566.1 | GI:21553113  | Wasf3    | NP_660137.1    | 5  | -2.00 | 1 | 1 | 4  | 4  | wiskott-Aldrich syndrome protein family member 3 [Mus musculus]                                 | 55  |
| 573.1 | GI:168480106 | Zfr      | NP_035897.2    | 5  | -2.00 | 1 | 1 | 4  | 4  | zinc finger RNA-binding protein [Mus musculus]                                                  | 117 |
| 797.1 | GI:74315981  | Zranb2   | NP_059077.1    | 3  | -2.00 | 1 | 1 | 3  | 4  | zinc finger Ran-binding domain-containing protein 2 [Mus musculus]                              | 37  |
| 861.1 | GI:21311873  | Hsbp1    | NP_077181.1    | 3  | -2.00 | 1 | 1 | 2  | 4  | heat shock factor-binding protein 1 [Mus musculus]                                              | 9   |
| 23.1  | GI:126157504 | Srrm2    | NP_780438.2    | 32 | -1.91 | 8 | 8 | 27 | 30 | serine/arginine repetitive matrix protein 2 [Mus musculus]                                      | 283 |
| 157.1 | GI:20149756  | Eif4a3   | NP_619610.1    | 14 | -1.91 | 4 | 4 | 13 | 15 | eukaryotic initiation factor 4A-III [Mus musculus]                                              | 47  |
| 18.1  | GI:40018610  | Snrnp200 | NP_796188.2    | 33 | -1.86 | 8 | 8 | 29 | 29 | U5 small nuclear ribonucleoprotein 200 kDa helicase [Mus musculus]                              | 244 |
| 474.1 | GI:146149191 | Snw1     | NP_079783.2    | 6  | -1.81 | 2 | 2 | 6  | 7  | SNW domain-containing protein 1 [Mus musculus]                                                  | 61  |
| 212.1 | GI:153791358 | Sf3b1    | NP_112456.2    | 11 | -1.74 | 3 | 3 | 10 | 10 | splicing factor 3B subunit 1 [Mus musculus]                                                     | 146 |
| 270.1 | GI:40353220  | Bckdhb   | NP_954665.1    | 9  | -1.74 | 3 | 3 | 9  | 10 | 2-oxoisovalerate dehydrogenase subunit beta, mitochondrial [Mus musculus]                       | 35  |
| 143.1 | GI:110835726 | Dhx15    | NP_001036085.1 | 15 | -1.58 | 6 | 6 | 15 | 18 | putative pre-mRNA-splicing factor ATP-dependent RNA helicase DHX15 isoform 1 [Mus musculus]     | 80  |
| 243.1 | GI:124486807 | Ptprz1   | NP_001074775.1 | 10 | -1.58 | 3 | 3 | 8  | 9  | receptor-type tyrosine-protein phosphatase zeta precursor [Mus musculus]                        | 254 |
| 325.1 | GI:21450271  | Ncoa5    | NP_659141.1    | 8  | -1.58 | 1 | 1 | 3  | 3  | nuclear receptor coactivator 5 [Mus musculus]                                                   | 65  |
| 390.1 | GI:22779899  | Cdc5l    | NP_690023.1    | 7  | -1.58 | 2 | 2 | 6  | 6  | cell division cycle 5-like protein [Mus musculus]                                               | 92  |
| 440.1 | GI:194440687 | Srrm1    | NP_001123949.1 | 7  | -1.58 | 2 | 2 | 5  | 6  | serine/arginine repetitive matrix protein 1 isoform 2 [Mus musculus]                            | 104 |
| 501.1 | GI:86439992  | Tsc2     | NP_001034452.1 | 6  | -1.58 | 1 | 1 | 3  | 3  | tuberin isoform 2 [Mus musculus]                                                                | 194 |
| 527.1 | GI:86198339  | Scai     | NP_848893.2    | 5  | -1.58 | 1 | 1 | 3  | 3  | protein SCA1 [Mus musculus]                                                                     | 70  |
| 655.1 | GI:6755478   | Srsf2    | NP_035488.1    | 4  | -1.58 | 1 | 1 | 3  | 3  | serine/arginine-rich splicing factor 2 [Mus musculus]                                           | 25  |
| 671.1 | GI:54873617  | Ppm1e    | NP_796141.2    | 4  | -1.58 | 1 | 1 | 3  | 3  | protein phosphatase 1E [Mus musculus]                                                           | 83  |

|        |              |         |                |           |              |          |          |           |           |                                                                                                                           |     |
|--------|--------------|---------|----------------|-----------|--------------|----------|----------|-----------|-----------|---------------------------------------------------------------------------------------------------------------------------|-----|
| 713.1  | GI:15147224  | Sfxn1   | NP_081600.1    | <u>4</u>  | <u>-1.58</u> | <u>1</u> | <b>1</b> | <u>3</u>  | <b>3</b>  | sideroflexin-1 [Mus musculus]                                                                                             | 36  |
| 754.1  | GI:31980729  | Rasa1   | NP_038860.2    | <u>4</u>  | <u>-1.58</u> | <u>1</u> | <b>1</b> | <u>3</u>  | <b>3</b>  | rasGAP-activating-like protein 1 isoform 1 [Mus musculus]                                                                 | 89  |
| 865.1  | GI:19527154  | Brk1    | NP_598698.1    | <u>3</u>  | <u>-1.58</u> | <u>1</u> | <b>1</b> | <u>3</u>  | <b>3</b>  | protein BRICK1 [Mus musculus]                                                                                             | 9   |
| 906.1  | GI:113930675 | Camk2n1 | NP_079727.1    | <u>3</u>  | <u>-1.58</u> | <u>1</u> | <b>1</b> | <u>3</u>  | <b>3</b>  | calcium/calmodulin-dependent protein kinase II inhibitor 1 [Mus musculus]                                                 | 9   |
| 907.1  | GI:113199771 | Mog     | NP_034944.2    | <u>3</u>  | <u>-1.58</u> | <u>1</u> | <b>1</b> | <u>3</u>  | <b>3</b>  | myelin-oligodendrocyte glycoprotein precursor [Mus musculus]                                                              | 28  |
| 909.1  | GI:110625591 | Rbm22   | NP_080052.1    | <u>3</u>  | <u>-1.58</u> | <u>1</u> | <b>1</b> | <u>3</u>  | <b>3</b>  | pre-mRNA-splicing factor RBM22 [Mus musculus]                                                                             | 47  |
| 937.1  | GI:7242142   | Cops7a  | NP_036133.1    | <u>3</u>  | <u>-1.58</u> | <u>1</u> | <b>1</b> | <u>3</u>  | <b>3</b>  | COP9 signalosome complex subunit 7a isoform 1 [Mus musculus]                                                              | 30  |
| 1014.1 | GI:7106387   | Psma5   | NP_036097.1    | <u>2</u>  | <u>-1.58</u> | <u>1</u> | <b>1</b> | <u>2</u>  | <b>3</b>  | proteasome subunit alpha type-5 [Mus musculus]                                                                            | 26  |
| 1038.1 | GI:6678768   | Marcks  | NP_032564.1    | <u>2</u>  | <u>-1.58</u> | <u>1</u> | <b>1</b> | <u>2</u>  | <b>3</b>  | myristoylated alanine-rich C-kinase substrate [Mus musculus]                                                              | 30  |
| 1096.1 | GI:255003735 | Rpl10a  | NP_035417.2    | <u>2</u>  | <u>-1.58</u> | <u>1</u> | <b>1</b> | <u>2</u>  | <b>3</b>  | 60S ribosomal protein L10a [Mus musculus]                                                                                 | 25  |
| 1238.1 | GI:84370380  | Cpeb3   | NP_938042.2    | <u>2</u>  | <u>-1.58</u> | <u>1</u> | <b>1</b> | <u>2</u>  | <b>3</b>  | cytoplasmic polyadenylation element-binding protein 3 [Mus musculus]                                                      | 78  |
| 256.1  | GI:34328400  | Srsf1   | NP_775550.2    | <u>10</u> | <u>-1.51</u> | <u>7</u> | <b>7</b> | <u>8</u>  | <b>20</b> | serine/arginine-rich splicing factor 1 isoform 1 [Mus musculus]                                                           | 28  |
| 235.1  | GI:268837785 | Sf3b2   | NP_084385.2    | <u>10</u> | <u>-1.42</u> | <u>3</u> | <b>3</b> | <u>8</u>  | <b>8</b>  | splicing factor 3b, subunit 2 [Mus musculus]                                                                              | 98  |
| 271.1  | GI:33859811  | Hadha   | NP_849209.1    | <u>9</u>  | <u>-1.42</u> | <u>3</u> | <b>3</b> | <u>8</u>  | <b>8</b>  | trifunctional enzyme subunit alpha, mitochondrial precursor [Mus musculus]                                                | 83  |
| 153.1  | GI:459683864 | Hnrnpr  | NP_001264050.1 | <u>14</u> | <u>-1.32</u> | <u>2</u> | <b>2</b> | <u>5</u>  | <b>5</b>  | heterogeneous nuclear ribonucleoprotein R isoform a [Mus musculus]                                                        | 71  |
| 491.2  | GI:119226245 | Srsf5   | NP_033185.2    | <u>5</u>  | <u>-1.32</u> | <u>2</u> | <b>2</b> | <u>4</u>  | <b>5</b>  | serine/arginine-rich splicing factor 5 [Mus musculus]                                                                     | 31  |
| 562.1  | GI:226823359 | Copa    | NP_034068.3    | <u>5</u>  | <u>-1.32</u> | <u>2</u> | <b>2</b> | <u>5</u>  | <b>5</b>  | coatamer subunit alpha [Mus musculus]                                                                                     | 138 |
| 579.1  | GI:157951741 | Cat     | NP_033934.2    | <u>5</u>  | <u>-1.32</u> | <u>2</u> | <b>2</b> | <u>4</u>  | <b>5</b>  | catalase [Mus musculus]                                                                                                   | 60  |
| 610.1  | GI:358030297 | Kcnab2  | NP_001239585.1 | <u>5</u>  | <u>-1.32</u> | <u>2</u> | <b>2</b> | <u>4</u>  | <b>5</b>  | voltage-gated potassium channel subunit beta-2 isoform 1 [Mus musculus]                                                   | 41  |
| 771.1  | GI:41152517  | H2afy   | NP_036145.1    | <u>4</u>  | <u>-1.32</u> | <u>2</u> | <b>2</b> | <u>4</u>  | <b>5</b>  | core histone macro-H2A.1 isoform 1 [Mus musculus]                                                                         | 40  |
| 787.1  | GI:189491657 | Cyld    | NP_001121643.1 | <u>4</u>  | <u>-1.32</u> | <u>2</u> | <b>2</b> | <u>4</u>  | <b>5</b>  | ubiquitin carboxyl-terminal hydrolase CYLD isoform b [Mus musculus]                                                       | 107 |
| 78.1   | GI:170172520 | Dbt     | NP_034152.2    | <u>19</u> | <u>-1.29</u> | <u>8</u> | <b>9</b> | <u>15</u> | <b>22</b> | lipoamide acyltransferase component of branched-chain alpha-keto acid dehydrogenase complex, mitochondrial [Mus musculus] | 53  |
| 203.1  | GI:160708010 | Kif1a   | NP_032466.2    | <u>12</u> | <u>-1.22</u> | <u>3</u> | <b>3</b> | <u>7</u>  | <b>7</b>  | kinesin-like protein KIF1A isoform a [Mus musculus]                                                                       | 192 |
| 617.1  | GI:6753820   | Srsf10  | NP_034308.1    | <u>5</u>  | <u>-1.22</u> | <u>3</u> | <b>3</b> | <u>5</u>  | <b>7</b>  | serine/arginine-rich splicing factor 10 isoform 1 [Mus musculus]                                                          | 22  |
| 725.1  | GI:112181182 | Cox5a   | NP_031773.2    | <u>4</u>  | <u>-1.22</u> | <u>3</u> | <b>3</b> | <u>4</u>  | <b>7</b>  | cytochrome c oxidase subunit 5A, mitochondrial precursor [Mus musculus]                                                   | 16  |
| 16.18  | GI:85701680  | Krt76   | NP_001028349.1 | <u>4</u>  | <u>-1.17</u> | <u>2</u> | <b>4</b> | <u>3</u>  | <b>9</b>  | keratin, type II cytoskeletal 2 oral [Mus musculus]                                                                       | 63  |
| 16.15  | GI:51092301  | Gm5414  | NP_001003670.1 | <u>5</u>  | <u>-1.00</u> | <u>2</u> | <b>4</b> | <u>4</u>  | <b>8</b>  | type II keratin Kb14 [Mus musculus]                                                                                       | 60  |
| 85.2   | GI:31560653  | Pfkl    | NP_032852.2    | <u>15</u> | <u>-1.00</u> | <u>8</u> | <b>8</b> | <u>14</u> | <b>16</b> | 6-phosphofructokinase, liver type [Mus musculus]                                                                          | 85  |
| 163.2  | GI:157278527 | Cep170  | NP_001093107.2 | <u>11</u> | <u>-1.00</u> | <u>5</u> | <b>5</b> | <u>8</u>  | <b>10</b> | centrosomal protein of 170 kDa [Mus musculus]                                                                             | 174 |
| 247.2  | GI:7305229   | Ldhc    | NP_038608.1    | <u>2</u>  | <u>-1.00</u> | <u>1</u> | <b>1</b> | <u>2</u>  | <b>2</b>  | L-lactate dehydrogenase C chain [Mus musculus]                                                                            | 36  |

|       |              |          |                |          |              |          |          |          |           |                                                                                                  |     |
|-------|--------------|----------|----------------|----------|--------------|----------|----------|----------|-----------|--------------------------------------------------------------------------------------------------|-----|
| 342.1 | GI:6677975   | Tra2b    | NP_033212.1    | <u>8</u> | <u>-1.00</u> | <u>4</u> | <u>5</u> | <u>7</u> | <u>10</u> | transformer-2 protein homolog beta [Mus musculus]                                                | 34  |
| 404.1 | GI:124487333 | Ppig     | NP_001074555.1 | <u>7</u> | <u>-1.00</u> | <u>3</u> | <u>3</u> | <u>6</u> | <u>6</u>  | peptidyl-prolyl cis-trans isomerase G [Mus musculus]                                             | 88  |
| 411.1 | GI:110625624 | Tcp1     | NP_038714.2    | <u>7</u> | <u>-1.00</u> | <u>3</u> | <u>3</u> | <u>6</u> | <u>6</u>  | T-complex protein 1 subunit alpha [Mus musculus]                                                 | 60  |
| 413.2 | GI:7242199   | Rasgrf2  | NP_033053.2    | <u>5</u> | <u>-1.00</u> | <u>2</u> | <u>2</u> | <u>4</u> | <u>4</u>  | ras-specific guanine nucleotide-releasing factor 2 [Mus musculus]                                | 136 |
| 421.1 | GI:31542427  | Csnk2a1  | NP_031814.2    | <u>7</u> | <u>-1.00</u> | <u>3</u> | <u>4</u> | <u>5</u> | <u>8</u>  | casein kinase II subunit alpha [Mus musculus]                                                    | 45  |
| 462.1 | GI:31981251  | Chtop    | NP_075704.2    | <u>6</u> | <u>-1.00</u> | <u>2</u> | <u>3</u> | <u>5</u> | <u>6</u>  | chromatin target of PRMT1 protein [Mus musculus]                                                 | 24  |
| 491.1 | GI:165377173 | Srsf4    | NP_065612.2    | <u>6</u> | <u>-1.00</u> | <u>3</u> | <u>3</u> | <u>4</u> | <u>6</u>  | serine/arginine-rich splicing factor 4 [Mus musculus]                                            | 56  |
| 497.1 | GI:21704096  | Tardbp   | NP_663531.1    | <u>6</u> | <u>-1.00</u> | <u>3</u> | <u>3</u> | <u>6</u> | <u>6</u>  | TAR DNA-binding protein 43 isoform 1 [Mus musculus]                                              | 45  |
| 604.3 | GI:13385374  | Rab5a    | NP_080163.1    | <u>3</u> | <u>-1.00</u> | <u>1</u> | <u>1</u> | <u>2</u> | <u>2</u>  | ras-related protein Rab-5A [Mus musculus]                                                        | 24  |
| 644.1 | GI:100818462 | Rap1gds1 | NP_663519.2    | <u>5</u> | <u>-1.00</u> | <u>3</u> | <u>3</u> | <u>5</u> | <u>6</u>  | RAP1, GTP-GDP dissociation stimulator 1 isoform b [Mus musculus]                                 | 61  |
| 649.1 | GI:84781690  | Iqsec3   | NP_001028526.1 | <u>4</u> | <u>-1.00</u> | <u>1</u> | <u>1</u> | <u>2</u> | <u>2</u>  | IQ motif and SEC7 domain-containing protein 3 [Mus musculus]                                     | 129 |
| 660.1 | GI:6680946   | Cirbp    | NP_031731.1    | <u>4</u> | <u>-1.00</u> | <u>2</u> | <u>2</u> | <u>4</u> | <u>4</u>  | cold-inducible RNA-binding protein [Mus musculus]                                                | 19  |
| 684.1 | GI:29244530  | Hapln4   | NP_808568.1    | <u>4</u> | <u>-1.00</u> | <u>2</u> | <u>2</u> | <u>4</u> | <u>4</u>  | hyaluronan and proteoglycan link protein 4 precursor [Mus musculus]                              | 43  |
| 691.1 | GI:254553372 | Iars     | NP_742012.2    | <u>4</u> | <u>-1.00</u> | <u>1</u> | <u>1</u> | <u>2</u> | <u>2</u>  | isoleucine--tRNA ligase, cytoplasmic [Mus musculus]                                              | 144 |
| 710.1 | GI:161086984 | Ap2s1    | NP_941015.2    | <u>4</u> | <u>-1.00</u> | <u>2</u> | <u>3</u> | <u>4</u> | <u>6</u>  | AP-2 complex subunit sigma [Mus musculus]                                                        | 17  |
| 727.1 | GI:110626031 | Khdrbs1  | NP_035447.3    | <u>4</u> | <u>-1.00</u> | <u>2</u> | <u>2</u> | <u>4</u> | <u>4</u>  | KH domain-containing, RNA-binding, signal transduction-associated protein 1 [Mus musculus]       | 48  |
| 731.2 | GI:226693361 | Cct6b    | NP_033969.2    | <u>2</u> | <u>-1.00</u> | <u>1</u> | <u>1</u> | <u>2</u> | <u>2</u>  | T-complex protein 1 subunit zeta-2 [Mus musculus]                                                | 58  |
| 732.1 | GI:38142460  | Etfb     | NP_080971.2    | <u>4</u> | <u>-1.00</u> | <u>2</u> | <u>2</u> | <u>4</u> | <u>4</u>  | electron transfer flavoprotein subunit beta [Mus musculus]                                       | 28  |
| 733.2 | GI:237858791 | Grm2     | NP_001153825.1 | <u>2</u> | <u>-1.00</u> | <u>1</u> | <u>1</u> | <u>2</u> | <u>2</u>  | metabotropic glutamate receptor 2 precursor [Mus musculus]                                       | 96  |
| 761.1 | GI:76677895  | Puf60    | NP_598452.2    | <u>4</u> | <u>-1.00</u> | <u>2</u> | <u>2</u> | <u>4</u> | <u>4</u>  | poly(U)-binding-splicing factor PUF60 isoform b [Mus musculus]                                   | 59  |
| 782.1 | GI:254587962 | Pgam5    | NP_001157010.1 | <u>4</u> | <u>-1.00</u> | <u>2</u> | <u>2</u> | <u>4</u> | <u>4</u>  | serine/threonine-protein phosphatase PGAM5, mitochondrial isoform 1 [Mus musculus]               | 32  |
| 789.1 | GI:121674799 | Rnps1    | NP_001073597.1 | <u>4</u> | <u>-1.00</u> | <u>2</u> | <u>2</u> | <u>3</u> | <u>4</u>  | RNA-binding protein with serine-rich domain 1 isoform 2 [Mus musculus]                           | 32  |
| 811.1 | GI:6680908   | Cdk5     | NP_031694.1    | <u>3</u> | <u>-1.00</u> | <u>1</u> | <u>1</u> | <u>2</u> | <u>2</u>  | cyclin-dependent kinase 5 [Mus musculus]                                                         | 33  |
| 837.1 | GI:29825827  | Vps26b   | NP_821170.1    | <u>3</u> | <u>-1.00</u> | <u>1</u> | <u>1</u> | <u>2</u> | <u>2</u>  | vacuolar protein sorting-associated protein 26B [Mus musculus]                                   | 39  |
| 850.1 | GI:225703070 | Cenpv    | NP_082724.1    | <u>3</u> | <u>-1.00</u> | <u>1</u> | <u>1</u> | <u>2</u> | <u>2</u>  | centromere protein V [Mus musculus]                                                              | 28  |
| 881.1 | GI:153792534 | Ranbp2   | NP_035370.2    | <u>3</u> | <u>-1.00</u> | <u>1</u> | <u>1</u> | <u>2</u> | <u>2</u>  | E3 SUMO-protein ligase RanBP2 [Mus musculus]                                                     | 341 |
| 894.1 | GI:125490368 | Pip4k2a  | NP_032871.3    | <u>3</u> | <u>-1.00</u> | <u>1</u> | <u>1</u> | <u>2</u> | <u>2</u>  | phosphatidylinositol 5-phosphate 4-kinase type-2 alpha [Mus musculus]                            | 46  |
| 913.2 | GI:40254160  | Rap2a    | NP_083795.2    | <u>2</u> | <u>-1.00</u> | <u>1</u> | <u>1</u> | <u>2</u> | <u>2</u>  | ras-related protein Rap-2a precursor [Mus musculus]                                              | 21  |
| 946.1 | GI:51491852  | Mars     | NP_001003913.1 | <u>3</u> | <u>-1.00</u> | <u>1</u> | <u>1</u> | <u>2</u> | <u>2</u>  | methionine--tRNA ligase, cytoplasmic isoform 2 [Mus musculus]                                    | 101 |
| 954.1 | GI:433809357 | Arvcf    | NP_001258958.1 | <u>3</u> | <u>-1.00</u> | <u>1</u> | <u>1</u> | <u>2</u> | <u>2</u>  | armadillo repeat protein deleted in velo-cardio-facial syndrome homolog isoform 2 [Mus musculus] | 104 |

|        |              |          |                |          |              |          |          |          |          |                                                                                                         |     |
|--------|--------------|----------|----------------|----------|--------------|----------|----------|----------|----------|---------------------------------------------------------------------------------------------------------|-----|
| 962.1  | GI:312222673 | Rgs7     | NP_001185932.1 | <u>3</u> | <u>-1.00</u> | <u>1</u> | <u>1</u> | <u>2</u> | <u>2</u> | regulator of G-protein signaling 7 isoform 2 [Mus musculus]                                             | 55  |
| 987.1  | GI:9790161   | Pkp1     | NP_062619.1    | <u>2</u> | <u>-1.00</u> | <u>1</u> | <u>1</u> | <u>2</u> | <u>2</u> | plakophilin-1 [Mus musculus]                                                                            | 81  |
| 997.1  | GI:9055370   | Eif3i    | NP_061269.1    | <u>2</u> | <u>-1.00</u> | <u>1</u> | <u>1</u> | <u>2</u> | <u>2</u> | eukaryotic translation initiation factor 3 subunit I [Mus musculus]                                     | 36  |
| 998.1  | GI:87116686  | Kenj10   | NP_001034573.1 | <u>2</u> | <u>-1.00</u> | <u>1</u> | <u>1</u> | <u>2</u> | <u>2</u> | ATP-sensitive inward rectifier potassium channel 10 [Mus musculus]                                      | 42  |
| 999.1  | GI:87042277  | Numb1    | NP_035080.2    | <u>2</u> | <u>-1.00</u> | <u>1</u> | <u>1</u> | <u>2</u> | <u>2</u> | numb-like protein [Mus musculus]                                                                        | 64  |
| 1006.1 | GI:7710028   | Gpc1     | NP_057905.1    | <u>2</u> | <u>-1.00</u> | <u>1</u> | <u>1</u> | <u>2</u> | <u>2</u> | glypican-1 precursor [Mus musculus]                                                                     | 61  |
| 1010.1 | GI:7305107   | Grcc10   | NP_038563.1    | <u>2</u> | <u>-1.00</u> | <u>1</u> | <u>1</u> | <u>2</u> | <u>2</u> | protein C10 [Mus musculus]                                                                              | 13  |
| 1017.1 | GI:70906453  | Bcas2    | NP_080878.2    | <u>2</u> | <u>-1.00</u> | <u>1</u> | <u>1</u> | <u>2</u> | <u>2</u> | pre-mRNA-splicing factor SPF27 [Mus musculus]                                                           | 26  |
| 1028.1 | GI:6753492   | Coro1a   | NP_034028.1    | <u>2</u> | <u>-1.00</u> | <u>1</u> | <u>1</u> | <u>2</u> | <u>2</u> | coronin-1A [Mus musculus]                                                                               | 51  |
| 1043.1 | GI:53988376  | Rsrc2    | NP_001005525.1 | <u>2</u> | <u>-1.00</u> | <u>1</u> | <u>1</u> | <u>2</u> | <u>2</u> | arginine/serine-rich coiled-coil protein 2 [Mus musculus]                                               | 51  |
| 1058.1 | GI:33859662  | Vat1     | NP_036167.1    | <u>2</u> | <u>-1.00</u> | <u>1</u> | <u>1</u> | <u>2</u> | <u>2</u> | synaptic vesicle membrane protein VAT-1 homolog [Mus musculus]                                          | 43  |
| 1061.1 | GI:31982030  | Arhgdia  | NP_598557.3    | <u>2</u> | <u>-1.00</u> | <u>1</u> | <u>1</u> | <u>2</u> | <u>2</u> | rho GDP-dissociation inhibitor 1 [Mus musculus]                                                         | 23  |
| 1072.1 | GI:31543902  | Txnl1    | NP_058072.2    | <u>2</u> | <u>-1.00</u> | <u>1</u> | <u>1</u> | <u>2</u> | <u>2</u> | thioredoxin-like protein 1 [Mus musculus]                                                               | 32  |
| 1083.1 | GI:27754065  | Ppa1     | NP_080714.2    | <u>2</u> | <u>-1.00</u> | <u>1</u> | <u>1</u> | <u>2</u> | <u>2</u> | inorganic pyrophosphatase [Mus musculus]                                                                | 33  |
| 1086.1 | GI:27369748  | Aldh5a1  | NP_766120.1    | <u>2</u> | <u>-1.00</u> | <u>1</u> | <u>1</u> | <u>2</u> | <u>2</u> | succinate-semialdehyde dehydrogenase, mitochondrial precursor [Mus musculus]                            | 56  |
| 1124.1 | GI:226443061 | Usp31    | NP_001028345.1 | <u>2</u> | <u>-1.00</u> | <u>1</u> | <u>1</u> | <u>2</u> | <u>2</u> | ubiquitin specific protease 31 [Mus musculus]                                                           | 146 |
| 1125.1 | GI:22507355  | Slc8a2   | NP_683748.1    | <u>2</u> | <u>-1.00</u> | <u>1</u> | <u>1</u> | <u>2</u> | <u>2</u> | sodium/calcium exchanger 2 precursor [Mus musculus]                                                     | 101 |
| 1130.1 | GI:22095023  | Map2k4   | NP_033183.1    | <u>2</u> | <u>-1.00</u> | <u>1</u> | <u>1</u> | <u>2</u> | <u>2</u> | dual specificity mitogen-activated protein kinase kinase 4 [Mus musculus]                               | 44  |
| 1134.1 | GI:21704122  | Pdk3     | NP_663605.1    | <u>2</u> | <u>-1.00</u> | <u>1</u> | <u>1</u> | <u>2</u> | <u>2</u> | pyruvate dehydrogenase kinase, isozyme 3 [Mus musculus]                                                 | 48  |
| 1140.1 | GI:21313618  | Chchd3   | NP_079612.1    | <u>2</u> | <u>-1.00</u> | <u>1</u> | <u>1</u> | <u>2</u> | <u>2</u> | coiled-coil-helix-coiled-coil-helix domain-containing protein 3, mitochondrial precursor [Mus musculus] | 26  |
| 1143.1 | GI:21312314  | Dusp3    | NP_082483.1    | <u>2</u> | <u>-1.00</u> | <u>1</u> | <u>1</u> | <u>2</u> | <u>2</u> | dual specificity protein phosphatase 3 [Mus musculus]                                                   | 20  |
| 1147.1 | GI:19882201  | Psm2     | NP_598862.1    | <u>2</u> | <u>-1.00</u> | <u>1</u> | <u>1</u> | <u>2</u> | <u>2</u> | 26S proteasome non-ATPase regulatory subunit 2 [Mus musculus]                                           | 100 |
| 1153.1 | GI:19263322  | Wdr77    | NP_081708.1    | <u>2</u> | <u>-1.00</u> | <u>1</u> | <u>1</u> | <u>2</u> | <u>2</u> | methylosome protein 50 [Mus musculus]                                                                   | 37  |
| 1159.1 | GI:171906571 | Ahi1     | NP_080479.2    | <u>2</u> | <u>-1.00</u> | <u>1</u> | <u>1</u> | <u>2</u> | <u>2</u> | joubertin isoform 1 [Mus musculus]                                                                      | 120 |
| 1160.1 | GI:169790905 | Bai3     | NP_783573.4    | <u>2</u> | <u>-1.00</u> | <u>1</u> | <u>1</u> | <u>1</u> | <u>2</u> | brain-specific angiogenesis inhibitor 3 precursor [Mus musculus]                                        | 171 |
| 1162.1 | GI:16716597  | Hsd17b11 | NP_444492.1    | <u>2</u> | <u>-1.00</u> | <u>1</u> | <u>1</u> | <u>2</u> | <u>2</u> | estradiol 17-beta-dehydrogenase 11 precursor [Mus musculus]                                             | 33  |
| 1172.1 | GI:160333722 | Snta1    | NP_033254.2    | <u>2</u> | <u>-1.00</u> | <u>1</u> | <u>1</u> | <u>2</u> | <u>2</u> | alpha-1-syntrophin [Mus musculus]                                                                       | 53  |
| 1179.1 | GI:156523248 | Prrt2    | NP_001096033.1 | <u>2</u> | <u>-1.00</u> | <u>1</u> | <u>1</u> | <u>2</u> | <u>2</u> | proline-rich transmembrane protein 2 [Mus musculus]                                                     | 36  |
| 1199.1 | GI:124486662 | Vps51    | NP_001074510.1 | <u>2</u> | <u>-1.00</u> | <u>1</u> | <u>1</u> | <u>2</u> | <u>2</u> | vacuolar protein sorting-associated protein 51 homolog [Mus musculus]                                   | 86  |
| 1205.1 | GI:11230780  | Tsg101   | NP_068684.1    | <u>2</u> | <u>-1.00</u> | <u>1</u> | <u>1</u> | <u>2</u> | <u>2</u> | tumor susceptibility gene 101 protein [Mus musculus]                                                    | 44  |
| 1215.1 | GI:6678055   | Snrpd1   | NP_033252.1    | <u>2</u> | <u>-1.00</u> | <u>1</u> | <u>1</u> | <u>1</u> | <u>2</u> | small nuclear ribonucleoprotein Sm D1 [Mus musculus]                                                    | 13  |



|        |              |         |                |           |       |           |    |           |    |                                                                                    |     |
|--------|--------------|---------|----------------|-----------|-------|-----------|----|-----------|----|------------------------------------------------------------------------------------|-----|
| 1220.1 | GI:21704120  | Pls3    | NP_663604.1    | <u>2</u>  | -1.00 | <u>1</u>  | 1  | <u>2</u>  | 2  | plastin-3 [Mus musculus]                                                           | 71  |
| 1230.1 | GI:9790109   | Prmt1   | NP_062804.1    | <u>2</u>  | -1.00 | <u>1</u>  | 1  | <u>2</u>  | 2  | protein arginine N-methyltransferase 1 isoform 1 [Mus musculus]                    | 42  |
| 1239.1 | GI:80861468  | Cacnb4  | NP_001032176.1 | <u>2</u>  | -1.00 | <u>1</u>  | 1  | <u>2</u>  | 2  | voltage-dependent L-type calcium channel subunit beta-4 isoform a [Mus musculus]   | 58  |
| 1242.1 | GI:71979930  | Specc1  | NP_001025107.1 | <u>2</u>  | -1.00 | <u>1</u>  | 1  | <u>2</u>  | 2  | cytospin-B isoform 2 [Mus musculus]                                                | 109 |
| 1269.1 | GI:294774558 | Gng12   | NP_001171028.1 | <u>2</u>  | -1.00 | <u>1</u>  | 1  | <u>2</u>  | 2  | guanine nucleotide-binding protein G(l)/G(S)/G(O) subunit gamma-12 [Mus musculus]  | 8   |
| 1273.1 | GI:255918233 | Cpsf1   | NP_001157645.1 | <u>2</u>  | -1.00 | <u>1</u>  | 1  | <u>2</u>  | 2  | cleavage and polyadenylation specificity factor subunit 1 isoform 1 [Mus musculus] | 162 |
| 1277.1 | GI:253314544 | Mapre2  | NP_001156414.1 | <u>2</u>  | -1.00 | <u>1</u>  | 1  | <u>2</u>  | 2  | microtubule-associated protein RP/EB family member 2 isoform 3 [Mus musculus]      | 32  |
| 1279.1 | GI:239787890 | Tgm1    | NP_001155186.1 | <u>2</u>  | -1.00 | <u>1</u>  | 1  | <u>2</u>  | 2  | protein-glutamine gamma-glutamyltransferase K [Mus musculus]                       | 90  |
| 1320.1 | GI:7305599   | Ttr     | NP_038725.1    | <u>1</u>  | -1.00 | <u>1</u>  | 1  | <u>1</u>  | 2  | transthyretin precursor [Mus musculus]                                             | 16  |
| 1336.1 | GI:6754508   | Lasp1   | NP_034818.1    | <u>1</u>  | -1.00 | <u>1</u>  | 1  | <u>1</u>  | 2  | LIM and SH3 domain protein 1 [Mus musculus]                                        | 30  |
| 1352.1 | GI:6679543   | Ptn     | NP_032999.1    | <u>1</u>  | -1.00 | <u>1</u>  | 1  | <u>1</u>  | 2  | pleiotrophin precursor [Mus musculus]                                              | 19  |
| 1394.1 | GI:37574048  | Uqcr10  | NP_932096.1    | <u>1</u>  | -1.00 | <u>1</u>  | 1  | <u>1</u>  | 2  | cytochrome b-c1 complex subunit 9 [Mus musculus]                                   | 7   |
| 1397.1 | GI:34787412  | Hdgfrp3 | NP_038914.2    | <u>1</u>  | -1.00 | <u>1</u>  | 1  | <u>1</u>  | 2  | hepatoma-derived growth factor-related protein 3 [Mus musculus]                    | 22  |
| 45.1   | GI:226958549 | Tnr     | NP_071707.2    | <u>24</u> | -0.94 | <u>13</u> | 13 | <u>21</u> | 25 | tenascin-R precursor [Mus musculus]                                                | 149 |
| 114.1  | GI:6755594   | Eftud2  | NP_035561.1    | <u>16</u> | -0.89 | <u>6</u>  | 7  | <u>13</u> | 13 | 116 kDa U5 small nuclear ribonucleoprotein component isoform a [Mus musculus]      | 109 |
| 259.1  | GI:6678197   | Syt1    | NP_033332.1    | <u>10</u> | -0.87 | <u>6</u>  | 6  | <u>10</u> | 11 | synaptotagmin-1 isoform 1 [Mus musculus]                                           | 47  |
| 369.1  | GI:283436176 | Hnrnpc  | NP_001164452.1 | <u>8</u>  | -0.87 | <u>6</u>  | 6  | <u>8</u>  | 11 | heterogeneous nuclear ribonucleoproteins C1/C2 isoform 2 [Mus musculus]            | 33  |
| 216.1  | GI:464397471 | Dlgap4  | NP_001264115.1 | <u>11</u> | -0.85 | <u>5</u>  | 5  | <u>9</u>  | 9  | disks large-associated protein 4 isoform d [Mus musculus]                          | 107 |
| 124.1  | GI:183980004 | Hnrnpl  | NP_796275.3    | <u>15</u> | -0.81 | <u>7</u>  | 8  | <u>12</u> | 14 | heterogeneous nuclear ribonucleoprotein L [Mus musculus]                           | 64  |
| 278.1  | GI:19527174  | Sf3b3   | NP_598714.1    | <u>9</u>  | -0.81 | <u>4</u>  | 4  | <u>7</u>  | 7  | splicing factor 3B subunit 3 [Mus musculus]                                        | 135 |
| 382.1  | GI:6753322   | Cct4    | NP_033967.1    | <u>7</u>  | -0.81 | <u>4</u>  | 4  | <u>7</u>  | 7  | T-complex protein 1 subunit delta [Mus musculus]                                   | 58  |
| 619.1  | GI:6679108   | Npm1    | NP_032748.1    | <u>5</u>  | -0.81 | <u>4</u>  | 4  | <u>5</u>  | 7  | nucleophosmin isoform 1 [Mus musculus]                                             | 33  |
| 136.1  | GI:85662410  | Clip2   | NP_034120.2    | <u>15</u> | -0.78 | <u>7</u>  | 7  | <u>11</u> | 12 | CAP-Gly domain-containing linker protein 2 isoform a [Mus musculus]                | 116 |
| 436.1  | GI:283806685 | Luc7l2  | NP_001164320.1 | <u>7</u>  | -0.74 | <u>3</u>  | 3  | <u>4</u>  | 5  | putative RNA-binding protein Luc7-like 2 isoform 3 [Mus musculus]                  | 39  |
| 445.1  | GI:9789937   | Dnaja2  | NP_062768.1    | <u>6</u>  | -0.74 | <u>3</u>  | 3  | <u>5</u>  | 5  | dnaJ homolog subfamily A member 2 [Mus musculus]                                   | 46  |
| 469.1  | GI:20982845  | Fus     | NP_631888.1    | <u>6</u>  | -0.74 | <u>3</u>  | 3  | <u>5</u>  | 5  | RNA-binding protein FUS [Mus musculus]                                             | 53  |
| 490.1  | GI:254028159 | Safb    | NP_001156772.1 | <u>6</u>  | -0.74 | <u>3</u>  | 3  | <u>5</u>  | 5  | scaffold attachment factor B1 [Mus musculus]                                       | 105 |
| 528.1  | GI:84794597  | Ppp3r1  | NP_077779.2    | <u>5</u>  | -0.74 | <u>3</u>  | 3  | <u>5</u>  | 5  | calcineurin subunit B type 1 [Mus musculus]                                        | 19  |
| 542.1  | GI:6677777   | Rpl26   | NP_033106.1    | <u>5</u>  | -0.74 | <u>3</u>  | 3  | <u>5</u>  | 5  | 60S ribosomal protein L26 [Mus musculus]                                           | 17  |
| 618.1  | GI:66792808  | Rbfox1  | NP_067452.2    | <u>5</u>  | -0.74 | <u>3</u>  | 3  | <u>5</u>  | 5  | RNA binding protein fox-1 homolog 1 isoform gamma [Mus musculus]                   | 43  |
| 777.1  | GI:33186863  | Rpl13   | NP_058018.2    | <u>4</u>  | -0.74 | <u>3</u>  | 3  | <u>4</u>  | 5  | 60S ribosomal protein L13 [Mus musculus]                                           | 24  |

|       |              |          |                |           |       |           |           |           |           |                                                                                  |     |
|-------|--------------|----------|----------------|-----------|-------|-----------|-----------|-----------|-----------|----------------------------------------------------------------------------------|-----|
| 83.1  | GI:115511018 | Usp9x    | NP_033507.2    | <u>19</u> | -0.70 | <u>8</u>  | <b>8</b>  | <u>13</u> | <b>13</b> | probable ubiquitin carboxyl-terminal hydrolase FAF-X [Mus musculus]              | 290 |
| 16.8  | GI:54607171  | Krt6a    | NP_032502.3    | <u>10</u> | -0.69 | <u>8</u>  | <b>13</b> | <u>8</u>  | <b>21</b> | keratin, type II cytoskeletal 6A [Mus musculus]                                  | 59  |
| 27.3  | GI:6755863   | Hsp90b1  | NP_035761.1    | <u>10</u> | -0.68 | <u>5</u>  | <b>5</b>  | <u>8</u>  | <b>8</b>  | endoplasmic precursor [Mus musculus]                                             | 92  |
| 41.1  | GI:31982330  | Golga3   | NP_032172.3    | <u>25</u> | -0.68 | <u>9</u>  | <b>10</b> | <u>16</u> | <b>16</b> | Golgin subfamily A member 3 [Mus musculus]                                       | 163 |
| 281.1 | GI:157041260 | Epb4.1l2 | NP_038539.2    | <u>9</u>  | -0.68 | <u>5</u>  | <b>5</b>  | <u>8</u>  | <b>8</b>  | band 4.1-like protein 2 [Mus musculus]                                           | 110 |
| 393.1 | GI:21450129  | Acat1    | NP_659033.1    | <u>7</u>  | -0.68 | <u>4</u>  | <b>5</b>  | <u>6</u>  | <b>8</b>  | acetyl-CoA acetyltransferase, mitochondrial precursor [Mus musculus]             | 45  |
| 16.11 | GI:29789317  | Krt75    | NP_579935.1    | <u>8</u>  | -0.63 | <u>7</u>  | <b>11</b> | <u>5</u>  | <b>17</b> | keratin, type II cytoskeletal 75 [Mus musculus]                                  | 60  |
| 58.1  | GI:25141233  | Matr3    | NP_034901.2    | <u>21</u> | -0.58 | <u>13</u> | <b>14</b> | <u>18</u> | <b>21</b> | matrin-3 [Mus musculus]                                                          | 95  |
| 68.1  | GI:28395023  | Nckap1   | NP_058661.1    | <u>20</u> | -0.58 | <u>9</u>  | <b>10</b> | <u>14</u> | <b>15</b> | nck-associated protein 1 [Mus musculus]                                          | 129 |
| 103.1 | GI:190194418 | Dsp      | NP_076331.2    | <u>16</u> | -0.58 | <u>8</u>  | <b>8</b>  | <u>12</u> | <b>12</b> | desmoplakin [Mus musculus]                                                       | 333 |
| 104.1 | GI:189409138 | Cand1    | NP_082270.1    | <u>16</u> | -0.58 | <u>10</u> | <b>10</b> | <u>14</u> | <b>15</b> | cullin-associated NEDD8-dissociated protein 1 [Mus musculus]                     | 136 |
| 131.3 | GI:6671762   | Ckm      | NP_031736.1    | <u>6</u>  | -0.58 | <u>4</u>  | <b>4</b>  | <u>4</u>  | <b>6</b>  | creatine kinase M-type [Mus musculus]                                            | 43  |
| 146.1 | GI:133778983 | Klc2     | NP_032477.2    | <u>14</u> | -0.58 | <u>8</u>  | <b>8</b>  | <u>12</u> | <b>12</b> | kinesin light chain 2 [Mus musculus]                                             | 68  |
| 183.1 | GI:22267442  | Uqerc2   | NP_080175.1    | <u>12</u> | -0.58 | <u>6</u>  | <b>6</b>  | <u>9</u>  | <b>9</b>  | cytochrome b-c1 complex subunit 2, mitochondrial precursor [Mus musculus]        | 48  |
| 188.1 | GI:22122615  | Actr1b   | NP_666219.1    | <u>12</u> | -0.58 | <u>6</u>  | <b>6</b>  | <u>9</u>  | <b>9</b>  | beta-centractin [Mus musculus]                                                   | 42  |
| 221.1 | GI:444299617 | Uba1     | NP_001263246.1 | <u>11</u> | -0.58 | <u>6</u>  | <b>6</b>  | <u>8</u>  | <b>9</b>  | ubiquitin-like modifier-activating enzyme 1 isoform 2 [Mus musculus]             | 118 |
| 234.1 | GI:31981304  | Atp6v0d1 | NP_038505.2    | <u>10</u> | -0.58 | <u>6</u>  | <b>6</b>  | <u>7</u>  | <b>9</b>  | V-type proton ATPase subunit d 1 [Mus musculus]                                  | 40  |
| 259.2 | GI:31543797  | Syt2     | NP_033333.2    | <u>8</u>  | -0.58 | <u>5</u>  | <b>6</b>  | <u>8</u>  | <b>9</b>  | synaptotagmin-2 [Mus musculus]                                                   | 47  |
| 266.1 | GI:244790091 | Myef2    | NP_034982.2    | <u>10</u> | -0.58 | <u>6</u>  | <b>6</b>  | <u>9</u>  | <b>9</b>  | myelin expression factor 2 isoform 2 [Mus musculus]                              | 62  |
| 275.1 | GI:22203755  | Eif3c    | NP_666312.1    | <u>9</u>  | -0.58 | <u>4</u>  | <b>4</b>  | <u>6</u>  | <b>6</b>  | eukaryotic translation initiation factor 3 subunit C [Mus musculus]              | 105 |
| 286.2 | GI:6671746   | Cfl2     | NP_031714.1    | <u>2</u>  | -0.58 | <u>2</u>  | <b>2</b>  | <u>2</u>  | <b>3</b>  | cofilin-2 [Mus musculus]                                                         | 19  |
| 293.1 | GI:10946940  | Rab2a    | NP_067493.1    | <u>9</u>  | -0.58 | <u>6</u>  | <b>6</b>  | <u>9</u>  | <b>9</b>  | ras-related protein Rab-2A [Mus musculus]                                        | 24  |
| 298.1 | GI:19526960  | Opa1     | NP_598513.1    | <u>9</u>  | -0.58 | <u>5</u>  | <b>6</b>  | <u>8</u>  | <b>9</b>  | dynamitin-like 120 kDa protein, mitochondrial isoform 2 precursor [Mus musculus] | 111 |
| 301.1 | GI:34610235  | Rtn4     | NP_918943.1    | <u>9</u>  | -0.58 | <u>4</u>  | <b>4</b>  | <u>5</u>  | <b>6</b>  | reticulon-4 isoform A [Mus musculus]                                             | 127 |
| 338.1 | GI:118403314 | Rbm39    | NP_573505.2    | <u>8</u>  | -0.58 | <u>4</u>  | <b>4</b>  | <u>6</u>  | <b>6</b>  | RNA-binding protein 39 [Mus musculus]                                            | 59  |
| 377.1 | GI:7305619   | Usp5     | NP_038728.1    | <u>7</u>  | -0.58 | <u>4</u>  | <b>4</b>  | <u>6</u>  | <b>6</b>  | ubiquitin carboxyl-terminal hydrolase 5 [Mus musculus]                           | 96  |
| 391.1 | GI:225543409 | Pspe1    | NP_079958.3    | <u>7</u>  | -0.58 | <u>3</u>  | <b>4</b>  | <u>6</u>  | <b>6</b>  | paraspeckle component 1 [Mus musculus]                                           | 59  |
| 399.1 | GI:158854005 | Prpf4b   | NP_038858.2    | <u>7</u>  | -0.58 | <u>4</u>  | <b>4</b>  | <u>6</u>  | <b>6</b>  | serine/threonine-protein kinase PRP4 homolog [Mus musculus]                      | 117 |
| 407.1 | GI:113680348 | Fscn1    | NP_032010.2    | <u>7</u>  | -0.58 | <u>4</u>  | <b>4</b>  | <u>6</u>  | <b>6</b>  | fascin [Mus musculus]                                                            | 54  |
| 428.1 | GI:6677813   | Rps8     | NP_033124.1    | <u>7</u>  | -0.58 | <u>4</u>  | <b>4</b>  | <u>5</u>  | <b>6</b>  | 40S ribosomal protein S8 [Mus musculus]                                          | 24  |
| 458.1 | GI:46593021  | Uqerc1   | NP_079683.2    | <u>6</u>  | -0.58 | <u>4</u>  | <b>4</b>  | <u>5</u>  | <b>6</b>  | cytochrome b-c1 complex subunit 1, mitochondrial precursor [Mus musculus]        | 53  |
| 491.3 | GI:224967104 | Srsf6    | NP_080775.3    | <u>5</u>  | -0.58 | <u>2</u>  | <b>2</b>  | <u>3</u>  | <b>3</b>  | arginine/serine-rich splicing factor 6 [Mus musculus]                            | 39  |

|        |              |              |                |          |       |          |          |          |          |                                                                            |     |
|--------|--------------|--------------|----------------|----------|-------|----------|----------|----------|----------|----------------------------------------------------------------------------|-----|
| 524.1  | GI:9506971   | Pfn2         | NP_062283.1    | <u>5</u> | -0.58 | <u>2</u> | <b>2</b> | <u>2</u> | <b>3</b> | profilin-2 [Mus musculus]                                                  | 15  |
| 544.1  | GI:47059486  | Pdpx         | NP_064667.2    | <u>5</u> | -0.58 | <u>2</u> | <b>2</b> | <u>3</u> | <b>3</b> | pyridoxal phosphate phosphatase [Mus musculus]                             | 31  |
| 552.1  | GI:31542602  | Elavl1       | NP_034615.2    | <u>5</u> | -0.58 | <u>4</u> | <b>4</b> | <u>5</u> | <b>6</b> | ELAV-like protein 1 [Mus musculus]                                         | 36  |
| 582.1  | GI:13507622  | Sacm11       | NP_109617.1    | <u>5</u> | -0.58 | <u>2</u> | <b>2</b> | <u>3</u> | <b>3</b> | phosphatidylinositide phosphatase SAC1 [Mus musculus]                      | 67  |
| 608.1  | GI:6755763   | Alyref       | NP_035698.1    | <u>5</u> | -0.58 | <u>4</u> | <b>4</b> | <u>5</u> | <b>6</b> | THO complex subunit 4 [Mus musculus]                                       | 27  |
| 682.1  | GI:30519995  | Sfxn5        | NP_848754.1    | <u>4</u> | -0.58 | <u>2</u> | <b>2</b> | <u>3</u> | <b>3</b> | sideroflexin-5 [Mus musculus]                                              | 37  |
| 722.1  | GI:117606375 | Sept3        | NP_036019.2    | <u>4</u> | -0.58 | <u>2</u> | <b>2</b> | <u>3</u> | <b>3</b> | neuronal-specific septin-3 [Mus musculus]                                  | 39  |
| 733.1  | GI:32469489  | Grm3         | NP_862898.1    | <u>4</u> | -0.58 | <u>2</u> | <b>2</b> | <u>3</u> | <b>3</b> | metabotropic glutamate receptor 3 precursor [Mus musculus]                 | 99  |
| 737.1  | GI:262118191 | Nlgn3        | NP_766520.2    | <u>4</u> | -0.58 | <u>2</u> | <b>2</b> | <u>3</u> | <b>3</b> | neuroigin-3 precursor [Mus musculus]                                       | 91  |
| 738.1  | GI:257467604 | Gpd1l        | NP_780589.3    | <u>4</u> | -0.58 | <u>2</u> | <b>2</b> | <u>3</u> | <b>3</b> | glycerol-3-phosphate dehydrogenase 1-like protein [Mus musculus]           | 38  |
| 765.1  | GI:6754018   | Gnb5         | NP_034443.1    | <u>4</u> | -0.58 | <u>2</u> | <b>2</b> | <u>3</u> | <b>3</b> | guanine nucleotide-binding protein subunit beta-5 isoform 1 [Mus musculus] | 44  |
| 778.1  | GI:31559891  | Rhot1        | NP_067511.4    | <u>4</u> | -0.58 | <u>2</u> | <b>2</b> | <u>3</u> | <b>3</b> | mitochondrial Rho GTPase 1 isoform 1 [Mus musculus]                        | 72  |
| 779.1  | GI:309264022 | LOC100505031 | XP_003086186.1 | <u>4</u> | -0.58 | <u>2</u> | <b>2</b> | <u>3</u> | <b>3</b> | PREDICTED: 40S ribosomal protein SA-like [Mus musculus]                    | 33  |
| 799.1  | GI:67846113  | Snrnp70      | NP_033250.3    | <u>3</u> | -0.58 | <u>2</u> | <b>2</b> | <u>2</u> | <b>3</b> | U1 small nuclear ribonucleoprotein 70 kDa [Mus musculus]                   | 52  |
| 803.1  | GI:6755040   | Pfn1         | NP_035202.1    | <u>3</u> | -0.58 | <u>2</u> | <b>2</b> | <u>3</u> | <b>3</b> | profilin-1 [Mus musculus]                                                  | 15  |
| 812.1  | GI:6680836   | Calr         | NP_031617.1    | <u>3</u> | -0.58 | <u>2</u> | <b>2</b> | <u>3</u> | <b>3</b> | calreticulin precursor [Mus musculus]                                      | 48  |
| 816.1  | GI:6671702   | Cct5         | NP_031663.1    | <u>3</u> | -0.58 | <u>2</u> | <b>2</b> | <u>3</u> | <b>3</b> | T-complex protein 1 subunit epsilon [Mus musculus]                         | 60  |
| 830.1  | GI:33563294  | Pip4k2b      | NP_473392.1    | <u>3</u> | -0.58 | <u>2</u> | <b>2</b> | <u>3</u> | <b>3</b> | phosphatidylinositol 5-phosphate 4-kinase type-2 beta [Mus musculus]       | 47  |
| 835.1  | GI:30520131  | Slc6a1       | NP_848818.1    | <u>3</u> | -0.58 | <u>2</u> | <b>2</b> | <u>3</u> | <b>3</b> | sodium- and chloride-dependent GABA transporter 1 [Mus musculus]           | 67  |
| 840.1  | GI:28077049  | Chmp4b       | NP_083638.1    | <u>3</u> | -0.58 | <u>2</u> | <b>2</b> | <u>3</u> | <b>3</b> | charged multivesicular body protein 4b [Mus musculus]                      | 25  |
| 843.1  | GI:255982539 | Fbxl16       | NP_001157697.1 | <u>3</u> | -0.58 | <u>2</u> | <b>2</b> | <u>3</u> | <b>3</b> | F-box/LRR-repeat protein 16 [Mus musculus]                                 | 52  |
| 857.1  | GI:214010170 | Clu          | NP_038520.2    | <u>3</u> | -0.58 | <u>2</u> | <b>2</b> | <u>3</u> | <b>3</b> | clusterin precursor [Mus musculus]                                         | 52  |
| 866.1  | GI:19526912  | St13         | NP_598487.1    | <u>3</u> | -0.58 | <u>2</u> | <b>2</b> | <u>3</u> | <b>3</b> | hsc70-interacting protein [Mus musculus]                                   | 42  |
| 868.1  | GI:172072657 | Alg2         | NP_064382.3    | <u>3</u> | -0.58 | <u>2</u> | <b>2</b> | <u>3</u> | <b>3</b> | alpha-1,3/1,6-mannosyltransferase ALG2 [Mus musculus]                      | 47  |
| 910.1  | GI:6679909   | Gabbr2       | NP_032096.1    | <u>3</u> | -0.58 | <u>2</u> | <b>2</b> | <u>3</u> | <b>3</b> | gamma-aminobutyric acid receptor subunit beta-2 precursor [Mus musculus]   | 55  |
| 953.1  | GI:459683847 | Rpl22        | NP_001264043.1 | <u>3</u> | -0.58 | <u>2</u> | <b>2</b> | <u>3</u> | <b>3</b> | 60S ribosomal protein L22 isoform c [Mus musculus]                         | 9   |
| 965.1  | GI:295148172 | Madd         | NP_001171191.1 | <u>3</u> | -0.58 | <u>2</u> | <b>2</b> | <u>3</u> | <b>3</b> | MAP kinase-activating death domain protein isoform 11 [Mus musculus]       | 181 |
| 972.1  | GI:241982789 | Ptk2b        | NP_001155838.1 | <u>3</u> | -0.58 | <u>2</u> | <b>2</b> | <u>3</u> | <b>3</b> | protein-tyrosine kinase 2-beta isoform 1 [Mus musculus]                    | 116 |
| 973.1  | GI:240255574 | Csde1        | NP_001155326.1 | <u>3</u> | -0.58 | <u>2</u> | <b>2</b> | <u>3</u> | <b>3</b> | cold shock domain-containing protein E1 isoform 2 [Mus musculus]           | 86  |
| 1069.1 | GI:31560697  | H1f0         | NP_032223.2    | <u>2</u> | -0.58 | <u>2</u> | <b>2</b> | <u>2</u> | <b>3</b> | histone H1.0 [Mus musculus]                                                | 21  |
| 1070.1 | GI:31560651  | Ptdss1       | NP_032985.2    | <u>2</u> | -0.58 | <u>2</u> | <b>2</b> | <u>2</u> | <b>3</b> | phosphatidylserine synthase 1 [Mus musculus]                               | 56  |

|        |              |          |                |           |       |           |           |           |           |                                                                                                      |     |
|--------|--------------|----------|----------------|-----------|-------|-----------|-----------|-----------|-----------|------------------------------------------------------------------------------------------------------|-----|
| 1133.1 | GI:21704140  | Hibadh   | NP_663542.1    | <u>2</u>  | -0.58 | <u>2</u>  | <b>2</b>  | <u>2</u>  | <b>3</b>  | 3-hydroxyisobutyrate dehydrogenase, mitochondrial precursor [Mus musculus]                           | 35  |
| 1170.1 | GI:161377465 | Serpind1 | NP_032249.3    | <u>2</u>  | -0.58 | <u>2</u>  | <b>2</b>  | <u>2</u>  | <b>3</b>  | heparin cofactor 2 precursor [Mus musculus]                                                          | 54  |
| 1197.1 | GI:125628629 | Eif3d    | NP_061219.2    | <u>2</u>  | -0.58 | <u>2</u>  | <b>2</b>  | <u>2</u>  | <b>3</b>  | eukaryotic translation initiation factor 3 subunit D [Mus musculus]                                  | 64  |
| 16.7   | GI:20911031  | Krt5     | NP_081287.1    | <u>18</u> | -0.55 | <u>11</u> | <b>15</b> | <u>10</u> | <b>22</b> | keratin, type II cytoskeletal 5 [Mus musculus]                                                       | 62  |
| 88.1   | GI:6671684   | Ctnnb1   | NP_031640.1    | <u>18</u> | -0.54 | <u>10</u> | <b>11</b> | <u>14</u> | <b>16</b> | catenin beta-1 [Mus musculus]                                                                        | 85  |
| 168.1  | GI:31560656  | Pabpc1   | NP_032800.2    | <u>13</u> | -0.53 | <u>8</u>  | <b>9</b>  | <u>12</u> | <b>13</b> | polyadenylate-binding protein 1 [Mus musculus]                                                       | 71  |
| 15.1   | GI:150456419 | Dhx9     | NP_031868.2    | <u>36</u> | -0.52 | <u>15</u> | <b>16</b> | <u>21</u> | <b>23</b> | ATP-dependent RNA helicase A [Mus musculus]                                                          | 150 |
| 67.1   | GI:68533246  | Thrap3   | NP_666265.3    | <u>20</u> | -0.51 | <u>13</u> | <b>14</b> | <u>15</u> | <b>20</b> | thyroid hormone receptor-associated protein 3 [Mus musculus]                                         | 108 |
| 112.1  | GI:118136297 | Dlg2     | NP_035937.2    | <u>16</u> | -0.49 | <u>10</u> | <b>10</b> | <u>13</u> | <b>14</b> | disks large homolog 2 isoform 1 [Mus musculus]                                                       | 95  |
| 299.1  | GI:7305507   | Snap91   | NP_038697.1    | <u>9</u>  | -0.49 | <u>5</u>  | <b>5</b>  | <u>7</u>  | <b>7</b>  | clathrin coat assembly protein AP180 isoform 1 [Mus musculus]                                        | 92  |
| 317.1  | GI:411147387 | Yars     | NP_598912.4    | <u>8</u>  | -0.49 | <u>5</u>  | <b>5</b>  | <u>7</u>  | <b>7</b>  | tyrosine--tRNA ligase, cytoplasmic [Mus musculus]                                                    | 63  |
| 336.1  | GI:126723461 | Cct8     | NP_033970.3    | <u>8</u>  | -0.49 | <u>5</u>  | <b>5</b>  | <u>7</u>  | <b>7</b>  | T-complex protein 1 subunit theta [Mus musculus]                                                     | 60  |
| 349.1  | GI:215983062 | Ehd3     | NP_065603.2    | <u>8</u>  | -0.49 | <u>5</u>  | <b>5</b>  | <u>7</u>  | <b>7</b>  | EH domain-containing protein 3 [Mus musculus]                                                        | 61  |
| 417.1  | GI:45598396  | Prkar2b  | NP_035288.2    | <u>7</u>  | -0.49 | <u>5</u>  | <b>5</b>  | <u>7</u>  | <b>7</b>  | cAMP-dependent protein kinase type II-beta regulatory subunit [Mus musculus]                         | 46  |
| 121.1  | GI:52317148  | Ap3b2    | NP_067467.2    | <u>15</u> | -0.46 | <u>8</u>  | <b>8</b>  | <u>11</u> | <b>11</b> | AP-3 complex subunit beta-2 [Mus musculus]                                                           | 119 |
| 286.1  | GI:6680924   | Cfl1     | NP_031713.1    | <u>9</u>  | -0.46 | <u>8</u>  | <b>8</b>  | <u>8</u>  | <b>11</b> | cofilin-1 [Mus musculus]                                                                             | 19  |
| 111.1  | GI:27370092  | Tufm     | NP_766333.1    | <u>16</u> | -0.45 | <u>9</u>  | <b>11</b> | <u>13</u> | <b>15</b> | elongation factor Tu, mitochondrial isoform 1 [Mus musculus]                                         | 49  |
| 133.1  | GI:24418919  | Pygb     | NP_722476.1    | <u>15</u> | -0.45 | <u>10</u> | <b>11</b> | <u>14</u> | <b>15</b> | glycogen phosphorylase, brain form [Mus musculus]                                                    | 97  |
| 52.3   | GI:164663791 | Prkca    | NP_035231.2    | <u>10</u> | -0.42 | <u>6</u>  | <b>6</b>  | <u>6</u>  | <b>8</b>  | protein kinase C alpha type [Mus musculus]                                                           | 77  |
| 106.1  | GI:125661048 | Akap9    | NP_919444.2    | <u>16</u> | -0.42 | <u>6</u>  | <b>6</b>  | <u>8</u>  | <b>8</b>  | A-kinase anchor protein 9 [Mus musculus]                                                             | 434 |
| 130.2  | GI:41680705  | Grin2a   | NP_032196.2    | <u>7</u>  | -0.42 | <u>3</u>  | <b>3</b>  | <u>4</u>  | <b>4</b>  | glutamate receptor ionotropic, NMDA 2A precursor [Mus musculus]                                      | 165 |
| 227.1  | GI:157823795 | Kif21a   | NP_001102512.1 | <u>11</u> | -0.42 | <u>6</u>  | <b>6</b>  | <u>8</u>  | <b>8</b>  | kinesin-like protein KIF21A isoform 4 [Mus musculus]                                                 | 175 |
| 231.1  | GI:62909983  | Cpsf6    | NP_001013409.1 | <u>10</u> | -0.42 | <u>5</u>  | <b>6</b>  | <u>7</u>  | <b>8</b>  | cleavage and polyadenylation specificity factor subunit 6 [Mus musculus]                             | 59  |
| 249.1  | GI:158508501 | Sept5    | NP_998779.2    | <u>10</u> | -0.42 | <u>6</u>  | <b>6</b>  | <u>6</u>  | <b>8</b>  | septin-5 [Mus musculus]                                                                              | 43  |
| 274.1  | GI:254692859 | Ndufa9   | NP_079634.2    | <u>9</u>  | -0.42 | <u>6</u>  | <b>6</b>  | <u>7</u>  | <b>8</b>  | NADH dehydrogenase [ubiquinone] 1 alpha subcomplex subunit 9, mitochondrial precursor [Mus musculus] | 42  |
| 287.2  | GI:161086971 | Capza1   | NP_033927.2    | <u>4</u>  | -0.42 | <u>3</u>  | <b>3</b>  | <u>4</u>  | <b>4</b>  | F-actin-capping protein subunit alpha-1 [Mus musculus]                                               | 33  |
| 342.2  | GI:111160869 | Tra2a    | NP_932770.2    | <u>4</u>  | -0.42 | <u>3</u>  | <b>3</b>  | <u>4</u>  | <b>4</b>  | transformer-2 protein homolog alpha [Mus musculus]                                                   | 33  |
| 350.1  | GI:198278553 | My19     | NP_742116.1    | <u>8</u>  | -0.42 | <u>5</u>  | <b>6</b>  | <u>6</u>  | <b>8</b>  | myosin regulatory light polypeptide 9 [Mus musculus]                                                 | 20  |
| 355.1  | GI:194328708 | Oxr1     | NP_001123638.1 | <u>8</u>  | -0.42 | <u>6</u>  | <b>6</b>  | <u>6</u>  | <b>8</b>  | oxidation resistance protein 1 isoform E [Mus musculus]                                              | 96  |
| 379.1  | GI:6755965   | Vdac2    | NP_035825.1    | <u>7</u>  | -0.42 | <u>6</u>  | <b>6</b>  | <u>6</u>  | <b>8</b>  | voltage-dependent anion-selective channel protein 2 [Mus musculus]                                   | 32  |
| 397.1  | GI:163310736 | Tln2     | NP_001074711.2 | <u>7</u>  | -0.42 | <u>3</u>  | <b>3</b>  | <u>4</u>  | <b>4</b>  | talin-2 [Mus musculus]                                                                               | 271 |

|       |              |               |                |           |              |           |           |           |           |                                                                             |     |
|-------|--------------|---------------|----------------|-----------|--------------|-----------|-----------|-----------|-----------|-----------------------------------------------------------------------------|-----|
| 413.1 | GI:6755288   | Rasgrf1       | NP_035375.1    | <u>7</u>  | <u>-0.42</u> | <u>3</u>  | <b>3</b>  | <u>4</u>  | <u>4</u>  | ras-specific guanine nucleotide-releasing factor 1 isoform 1 [Mus musculus] | 144 |
| 473.1 | GI:158937310 | Ccdc177       | NP_001008423.2 | <u>6</u>  | <u>-0.42</u> | <u>3</u>  | <b>3</b>  | <u>4</u>  | <u>4</u>  | coiled-coil domain-containing protein 177 [Mus musculus]                    | 80  |
| 476.1 | GI:13385726  | Uqcrb         | NP_080495.1    | <u>6</u>  | <u>-0.42</u> | <u>3</u>  | <b>3</b>  | <u>4</u>  | <u>4</u>  | cytochrome b-c1 complex subunit 7 [Mus musculus]                            | 14  |
| 488.2 | GI:139948818 | Fam98a        | NP_598508.2    | <u>4</u>  | <u>-0.42</u> | <u>3</u>  | <b>3</b>  | <u>4</u>  | <u>4</u>  | protein FAM98A [Mus musculus]                                               | 55  |
| 511.1 | GI:38259194  | Dnajc6        | NP_940804.1    | <u>6</u>  | <u>-0.42</u> | <u>3</u>  | <b>3</b>  | <u>4</u>  | <u>4</u>  | putative tyrosine-protein phosphatase auxilin isoform c [Mus musculus]      | 98  |
| 558.1 | GI:254692972 | Cdc42bpa      | NP_001028457.1 | <u>5</u>  | <u>-0.42</u> | <u>3</u>  | <b>3</b>  | <u>4</u>  | <u>4</u>  | serine/threonine-protein kinase MRCK alpha [Mus musculus]                   | 197 |
| 560.1 | GI:238814391 | Cct7          | NP_031664.3    | <u>5</u>  | <u>-0.42</u> | <u>3</u>  | <b>3</b>  | <u>4</u>  | <u>4</u>  | T-complex protein 1 subunit eta [Mus musculus]                              | 60  |
| 563.1 | GI:22122795  | Dync1li1      | NP_666341.1    | <u>5</u>  | <u>-0.42</u> | <u>3</u>  | <b>3</b>  | <u>4</u>  | <u>4</u>  | cytoplasmic dynein 1 light intermediate chain 1 [Mus musculus]              | 57  |
| 576.1 | GI:160707896 | Strap         | NP_035629.2    | <u>5</u>  | <u>-0.42</u> | <u>3</u>  | <b>3</b>  | <u>3</u>  | <u>4</u>  | serine-threonine kinase receptor-associated protein [Mus musculus]          | 38  |
| 585.1 | GI:12963571  | Ndufa7        | NP_075691.1    | <u>5</u>  | <u>-0.42</u> | <u>3</u>  | <b>3</b>  | <u>4</u>  | <u>4</u>  | NADH dehydrogenase [ubiquinone] 1 alpha subcomplex subunit 7 [Mus musculus] | 13  |
| 586.1 | GI:125490380 | Slc32a1       | NP_033534.2    | <u>5</u>  | <u>-0.42</u> | <u>3</u>  | <b>3</b>  | <u>4</u>  | <u>4</u>  | vesicular inhibitory amino acid transporter [Mus musculus]                  | 57  |
| 590.1 | GI:124378024 | Dzank1        | NP_766447.2    | <u>5</u>  | <u>-0.42</u> | <u>3</u>  | <b>3</b>  | <u>4</u>  | <u>4</u>  | double zinc ribbon and ankyrin repeat-containing protein 1 [Mus musculus]   | 85  |
| 591.1 | GI:124244096 | Sart1         | NP_058578.3    | <u>5</u>  | <u>-0.42</u> | <u>3</u>  | <b>3</b>  | <u>4</u>  | <u>4</u>  | U4/U6.U5 tri-snRNP-associated protein 1 [Mus musculus]                      | 91  |
| 677.1 | GI:33563266  | Ndufa4        | NP_035016.1    | <u>4</u>  | <u>-0.42</u> | <u>3</u>  | <b>3</b>  | <u>3</u>  | <u>4</u>  | NADH dehydrogenase [ubiquinone] 1 alpha subcomplex subunit 4 [Mus musculus] | 9   |
| 728.1 | GI:110347535 | Hnrnpl1       | NP_659051.3    | <u>4</u>  | <u>-0.42</u> | <u>3</u>  | <b>3</b>  | <u>4</u>  | <u>4</u>  | heterogeneous nuclear ribonucleoprotein L-like [Mus musculus]               | 64  |
| 770.1 | GI:554506531 | Hpcal         | NP_001273012.1 | <u>4</u>  | <u>-0.42</u> | <u>3</u>  | <b>3</b>  | <u>3</u>  | <u>4</u>  | neuron-specific calcium-binding protein hippocalcin [Mus musculus]          | 22  |
| 950.1 | GI:46519160  | Rps24         | NP_997518.1    | <u>3</u>  | <u>-0.42</u> | <u>2</u>  | <b>3</b>  | <u>3</u>  | <u>4</u>  | 40S ribosomal protein S24 isoform 3 [Mus musculus]                          | 15  |
| 960.1 | GI:325910859 | Set           | NP_001191804.1 | <u>3</u>  | <u>-0.42</u> | <u>3</u>  | <b>3</b>  | <u>3</u>  | <u>4</u>  | protein SET isoform 2 [Mus musculus]                                        | 32  |
| 79.1  | GI:160333923 | Hnrnpu        | NP_058085.2    | <u>19</u> | <u>-0.39</u> | <u>13</u> | <b>16</b> | <u>17</u> | <u>21</u> | heterogeneous nuclear ribonucleoprotein U [Mus musculus]                    | 88  |
| 16.19 | GI:269914154 | 4732456N10Rik | NP_808385.2    | <u>4</u>  | <u>-0.39</u> | <u>4</u>  | <b>13</b> | <u>4</u>  | <u>17</u> | uncharacterized protein LOC239673 [Mus musculus]                            | 58  |
| 16.6  | GI:148539957 | Ina           | NP_666212.3    | <u>23</u> | <u>-0.36</u> | <u>16</u> | <b>28</b> | <u>20</u> | <u>36</u> | alpha-internexin [Mus musculus]                                             | 55  |
| 162.1 | GI:29244248  | Cnksr2        | NP_808419.1    | <u>13</u> | <u>-0.36</u> | <u>7</u>  | <b>7</b>  | <u>9</u>  | <u>9</u>  | connector enhancer of kinase suppressor of ras 2 [Mus musculus]             | 117 |
| 188.2 | GI:8392847   | Actr1a        | NP_058556.1    | <u>10</u> | <u>-0.36</u> | <u>4</u>  | <b>7</b>  | <u>7</u>  | <u>9</u>  | alpha-centractin [Mus musculus]                                             | 43  |
| 189.1 | GI:134288904 | Itsn1         | NP_034717.2    | <u>12</u> | <u>-0.36</u> | <u>7</u>  | <b>7</b>  | <u>9</u>  | <u>9</u>  | intersectin-1 isoform 1 [Mus musculus]                                      | 194 |
| 292.1 | GI:31982561  | Rtn1          | NP_703187.2    | <u>9</u>  | <u>-0.36</u> | <u>6</u>  | <b>7</b>  | <u>8</u>  | <u>9</u>  | reticulon-1 isoform A [Mus musculus]                                        | 84  |
| 373.1 | GI:163838648 | Atp5c1        | NP_001106209.1 | <u>8</u>  | <u>-0.36</u> | <u>6</u>  | <b>7</b>  | <u>7</u>  | <u>9</u>  | ATP synthase subunit gamma, mitochondrial isoform b [Mus musculus]          | 30  |
| 52.1  | GI:6755080   | Prkeg         | NP_035232.1    | <u>22</u> | <u>-0.32</u> | <u>12</u> | <b>16</b> | <u>15</u> | <u>20</u> | protein kinase C gamma type [Mus musculus]                                  | 78  |
| 60.1  | GI:189491684 | Dmxl2         | NP_766359.2    | <u>21</u> | <u>-0.32</u> | <u>11</u> | <b>12</b> | <u>15</u> | <u>15</u> | dmX-like protein 2 [Mus musculus]                                           | 340 |
| 82.1  | GI:27369581  | Slc25a12      | NP_766024.1    | <u>19</u> | <u>-0.32</u> | <u>12</u> | <b>12</b> | <u>15</u> | <u>15</u> | calcium-binding mitochondrial carrier protein Aralar1 [Mus musculus]        | 75  |
| 118.1 | GI:117606277 | Slc1a2        | NP_001070982.1 | <u>16</u> | <u>-0.32</u> | <u>12</u> | <b>16</b> | <u>14</u> | <u>20</u> | excitatory amino acid transporter 2 isoform 1 [Mus musculus]                | 62  |



|       |              |          |                |           |       |           |    |    |    |                                                                                   |     |
|-------|--------------|----------|----------------|-----------|-------|-----------|----|----|----|-----------------------------------------------------------------------------------|-----|
| 170.8 | GI:6680606   | Krt19    | NP_032497.1    | <u>4</u>  | -0.32 | <u>3</u>  | 4  | 4  | 5  | keratin, type I cytoskeletal 19 [Mus musculus]                                    | 45  |
| 204.1 | GI:9938002   | Lgi1     | NP_064674.1    | <u>11</u> | -0.32 | <u>8</u>  | 8  | 8  | 10 | leucine-rich glioma-inactivated protein 1 precursor [Mus musculus]                | 64  |
| 327.1 | GI:21313679  | Atp5h    | NP_082138.1    | <u>8</u>  | -0.32 | <u>6</u>  | 8  | 6  | 10 | ATP synthase subunit d, mitochondrial [Mus musculus]                              | 19  |
| 329.1 | GI:19526936  | Lancel2  | NP_598498.1    | <u>8</u>  | -0.32 | <u>4</u>  | 4  | 4  | 5  | lanC-like protein 2 [Mus musculus]                                                | 51  |
| 341.1 | GI:95772123  | Ppp1r12a | NP_082168.1    | <u>8</u>  | -0.32 | <u>4</u>  | 4  | 5  | 5  | protein phosphatase 1 regulatory subunit 12A [Mus musculus]                       | 112 |
| 378.1 | GI:68226731  | Npepps   | NP_032968.2    | <u>7</u>  | -0.32 | <u>4</u>  | 4  | 5  | 5  | puromycin-sensitive aminopeptidase [Mus musculus]                                 | 103 |
| 412.1 | GI:110349752 | Farp1    | NP_598843.3    | <u>7</u>  | -0.32 | <u>4</u>  | 4  | 5  | 5  | FERM, RhoGEF and pleckstrin domain-containing protein 1 [Mus musculus]            | 119 |
| 427.1 | GI:6754632   | Mapk1    | NP_036079.1    | <u>7</u>  | -0.32 | <u>4</u>  | 4  | 5  | 5  | mitogen-activated protein kinase 1 [Mus musculus]                                 | 41  |
| 431.1 | GI:551894084 | Sgip1    | NP_001272781.1 | <u>7</u>  | -0.32 | <u>4</u>  | 4  | 5  | 5  | SH3-containing GRB2-like protein 3-interacting protein 1 isoform a [Mus musculus] | 92  |
| 454.1 | GI:6679809   | Flot1    | NP_032053.1    | <u>6</u>  | -0.32 | <u>4</u>  | 4  | 5  | 5  | flotillin-1 [Mus musculus]                                                        | 47  |
| 507.3 | GI:12963723  | Rab3b    | NP_076026.1    | <u>4</u>  | -0.32 | <u>3</u>  | 4  | 4  | 5  | ras-related protein Rab-3B [Mus musculus]                                         | 25  |
| 522.1 | GI:9790221   | Arpc1a   | NP_062741.1    | <u>5</u>  | -0.32 | <u>3</u>  | 4  | 3  | 5  | actin-related protein 2/3 complex subunit 1A [Mus musculus]                       | 42  |
| 533.1 | GI:70778897  | Gtpbp1   | NP_038846.2    | <u>5</u>  | -0.32 | <u>4</u>  | 4  | 4  | 5  | GTP-binding protein 1 [Mus musculus]                                              | 72  |
| 551.1 | GI:31543876  | Tmod2    | NP_057920.2    | <u>5</u>  | -0.32 | <u>4</u>  | 4  | 5  | 5  | tropomodulin-2 [Mus musculus]                                                     | 39  |
| 571.1 | GI:188219614 | Uchl1    | NP_035800.2    | <u>5</u>  | -0.32 | <u>3</u>  | 4  | 4  | 5  | ubiquitin carboxyl-terminal hydrolase isozyme L1 [Mus musculus]                   | 25  |
| 572.1 | GI:18390323  | Rab14    | NP_080973.1    | <u>5</u>  | -0.32 | <u>4</u>  | 4  | 5  | 5  | ras-related protein Rab-14 [Mus musculus]                                         | 24  |
| 639.1 | GI:14149647  | Rpl9     | NP_035422.1    | <u>5</u>  | -0.32 | <u>4</u>  | 4  | 5  | 5  | 60S ribosomal protein L9 [Mus musculus]                                           | 22  |
| 16.5  | GI:124286811 | Nefh     | NP_035034.2    | <u>28</u> | -0.30 | <u>18</u> | 26 | 22 | 32 | neurofilament heavy polypeptide [Mus musculus]                                    | 117 |
| 81.1  | GI:188219589 | Lmnb1    | NP_034851.2    | <u>19</u> | -0.30 | <u>13</u> | 13 | 15 | 16 | lamin-B1 [Mus musculus]                                                           | 67  |
| 87.2  | GI:62234487  | Atp2b1   | NP_080758.1    | <u>15</u> | -0.30 | <u>12</u> | 13 | 15 | 16 | plasma membrane calcium ATPase 1 [Mus musculus]                                   | 135 |
| 154.2 | GI:6756039   | Ywhaq    | NP_035869.1    | <u>13</u> | -0.29 | <u>8</u>  | 9  | 10 | 11 | 14-3-3 protein theta [Mus musculus]                                               | 28  |
| 156.1 | GI:226442759 | Pip5k1c  | NP_001140159.1 | <u>14</u> | -0.29 | <u>9</u>  | 9  | 10 | 11 | phosphatidylinositol 4-phosphate 5-kinase type-1 gamma isoform 2 [Mus musculus]   | 69  |
| 173.1 | GI:299522842 | Dctn2    | NP_001177383.1 | <u>13</u> | -0.29 | <u>9</u>  | 9  | 11 | 11 | dynactin subunit 2 isoform 1 [Mus musculus]                                       | 45  |
| 44.1  | GI:157951729 | Ctnna2   | NP_001103234.1 | <u>25</u> | -0.26 | <u>14</u> | 15 | 17 | 18 | catenin alpha-2 isoform 2 [Mus musculus]                                          | 105 |
| 88.2  | GI:28395018  | Jup      | NP_034723.1    | <u>14</u> | -0.26 | <u>9</u>  | 10 | 11 | 12 | junction plakoglobin [Mus musculus]                                               | 82  |
| 123.1 | GI:283549150 | Shank1   | NP_001029287.1 | <u>15</u> | -0.26 | <u>10</u> | 10 | 11 | 12 | SH3 and multiple ankyrin repeat domains protein 1 [Mus musculus]                  | 226 |
| 135.1 | GI:171846263 | Homer1   | NP_671705.2    | <u>15</u> | -0.26 | <u>10</u> | 10 | 11 | 12 | homer protein homolog 1 isoform L [Mus musculus]                                  | 41  |
| 168.2 | GI:6754972   | Pabpc2   | NP_035163.1    | <u>7</u>  | -0.26 | <u>5</u>  | 5  | 6  | 6  | poly A binding protein, cytoplasmic 2 [Mus musculus]                              | 69  |
| 171.1 | GI:169403965 | Shank2   | NP_001106844.2 | <u>13</u> | -0.26 | <u>5</u>  | 5  | 6  | 6  | SH3 and multiple ankyrin repeat domains protein 2 isoform b [Mus musculus]        | 159 |
| 246.1 | GI:6755588   | Snap25   | NP_035558.1    | <u>10</u> | -0.26 | <u>6</u>  | 10 | 9  | 12 | synaptosomal-associated protein 25 [Mus musculus]                                 | 23  |
| 253.2 | GI:10946928  | HnrnpH1  | NP_067485.1    | <u>9</u>  | -0.26 | <u>7</u>  | 10 | 9  | 12 | heterogeneous nuclear ribonucleoprotein H [Mus musculus]                          | 49  |

|       |              |              |                |           |       |           |           |           |           |                                                                                            |     |
|-------|--------------|--------------|----------------|-----------|-------|-----------|-----------|-----------|-----------|--------------------------------------------------------------------------------------------|-----|
| 254.1 | GI:157951688 | Bean         | NP_031555.2    | <u>10</u> | -0.26 | <u>5</u>  | <b>5</b>  | <u>6</u>  | <u>6</u>  | brevican core protein isoform 1 precursor [Mus musculus]                                   | 96  |
| 290.1 | GI:283837783 | Unc13a       | NP_001025044.2 | <u>9</u>  | -0.26 | <u>5</u>  | <b>5</b>  | <u>6</u>  | <u>6</u>  | protein unc-13 homolog A [Mus musculus]                                                    | 194 |
| 305.1 | GI:68131560  | Osbpl6       | NP_663500.2    | <u>8</u>  | -0.26 | <u>5</u>  | <b>5</b>  | <u>6</u>  | <u>6</u>  | oxysterol-binding protein-related protein 6 [Mus musculus]                                 | 110 |
| 313.1 | GI:6671569   | Rplp0        | NP_031501.1    | <u>8</u>  | -0.26 | <u>5</u>  | <b>5</b>  | <u>6</u>  | <u>6</u>  | 60S acidic ribosomal protein P0 [Mus musculus]                                             | 34  |
| 315.1 | GI:52350563  | Gpr158       | NP_001004761.1 | <u>8</u>  | -0.26 | <u>5</u>  | <b>5</b>  | <u>6</u>  | <u>6</u>  | probable G-protein coupled receptor 158 precursor [Mus musculus]                           | 134 |
| 328.1 | GI:21312994  | Slc25a11     | NP_077173.1    | <u>8</u>  | -0.26 | <u>5</u>  | <b>5</b>  | <u>6</u>  | <u>6</u>  | mitochondrial 2-oxoglutarate/malate carrier protein [Mus musculus]                         | 34  |
| 334.1 | GI:13386106  | Nudt21       | NP_080899.1    | <u>8</u>  | -0.26 | <u>5</u>  | <b>5</b>  | <u>6</u>  | <u>6</u>  | cleavage and polyadenylation specificity factor subunit 5 [Mus musculus]                   | 26  |
| 354.1 | GI:19527358  | Prpf19       | NP_598890.1    | <u>8</u>  | -0.26 | <u>5</u>  | <b>5</b>  | <u>6</u>  | <u>6</u>  | pre-mRNA-processing factor 19 isoform 2 [Mus musculus]                                     | 55  |
| 402.1 | GI:13385872  | Ilf2         | NP_080650.1    | <u>7</u>  | -0.26 | <u>5</u>  | <b>5</b>  | <u>6</u>  | <u>6</u>  | interleukin enhancer-binding factor 2 [Mus musculus]                                       | 43  |
| 496.1 | GI:225543276 | Map7d1       | NP_001139442.1 | <u>6</u>  | -0.26 | <u>5</u>  | <b>5</b>  | <u>5</u>  | <u>6</u>  | MAP7 domain-containing protein 1 isoform 2 [Mus musculus]                                  | 86  |
| 496.2 | GI:225543273 | Map7d1       | NP_659190.3    | <u>6</u>  | -0.26 | <u>5</u>  | <b>5</b>  | <u>5</u>  | <u>6</u>  | MAP7 domain-containing protein 1 isoform 1 [Mus musculus]                                  | 93  |
| 584.1 | GI:13385006  | Cyc1         | NP_079843.1    | <u>5</u>  | -0.26 | <u>4</u>  | <b>5</b>  | <u>4</u>  | <u>6</u>  | cytochrome c1, heme protein, mitochondrial [Mus musculus]                                  | 35  |
| 16.4  | GI:39204499  | Nefl         | NP_035040.1    | <u>29</u> | -0.24 | <u>23</u> | <b>33</b> | <u>23</u> | <u>39</u> | neurofilament light polypeptide [Mus musculus]                                             | 61  |
| 9.2   | GI:171543853 | Map1b        | NP_032660.2    | <u>60</u> | -0.23 | <u>45</u> | <b>47</b> | <u>53</u> | <u>55</u> | microtubule-associated protein 1B [Mus musculus]                                           | 270 |
| 16.16 | GI:22164776  | Krt79        | NP_666175.1    | <u>5</u>  | -0.22 | <u>5</u>  | <b>6</b>  | <u>4</u>  | <u>7</u>  | keratin, type II cytoskeletal 79 [Mus musculus]                                            | 58  |
| 142.1 | GI:21313308  | Hnrnpm       | NP_084080.1    | <u>15</u> | -0.22 | <u>12</u> | <b>12</b> | <u>13</u> | <u>14</u> | heterogeneous nuclear ribonucleoprotein M isoform a [Mus musculus]                         | 78  |
| 145.1 | GI:13259378  | Stx1b        | NP_077725.1    | <u>14</u> | -0.22 | <u>10</u> | <b>12</b> | <u>12</u> | <u>14</u> | syntaxin-1B [Mus musculus]                                                                 | 33  |
| 200.1 | GI:309266718 | LOC100048759 | XP_003086840.1 | <u>12</u> | -0.22 | <u>6</u>  | <b>6</b>  | <u>7</u>  | <u>7</u>  | PREDICTED: complement C3-like, partial [Mus musculus]                                      | 171 |
| 292.2 | GI:56090141  | Rtn1         | NP_001007597.1 | <u>6</u>  | -0.22 | <u>5</u>  | <b>6</b>  | <u>6</u>  | <u>7</u>  | reticulon-1 isoform C [Mus musculus]                                                       | 24  |
| 352.1 | GI:6671549   | Prdx6        | NP_031479.1    | <u>8</u>  | -0.22 | <u>6</u>  | <b>6</b>  | <u>7</u>  | <u>7</u>  | peroxiredoxin-6 [Mus musculus]                                                             | 25  |
| 475.1 | GI:13994209  | Wasf1        | NP_114083.1    | <u>6</u>  | -0.22 | <u>6</u>  | <b>6</b>  | <u>5</u>  | <u>7</u>  | wiskott-Aldrich syndrome protein family member 1 [Mus musculus]                            | 61  |
| 87.1  | GI:6753140   | Atp2b2       | NP_033853.1    | <u>18</u> | -0.21 | <u>13</u> | <b>13</b> | <u>15</u> | <u>15</u> | plasma membrane calcium-transporting ATPase 2 [Mus musculus]                               | 133 |
| 97.1  | GI:83649713  | Baiap2       | NP_001032843.1 | <u>17</u> | -0.21 | <u>13</u> | <b>13</b> | <u>14</u> | <u>15</u> | brain-specific angiogenesis inhibitor 1-associated protein 2 isoform c [Mus musculus]      | 53  |
| 46.3  | GI:70906479  | Camk2d       | NP_001020610.1 | <u>20</u> | -0.20 | <u>13</u> | <b>20</b> | <u>18</u> | <u>23</u> | calcium/calmodulin-dependent protein kinase type II subunit delta isoform 1 [Mus musculus] | 58  |
| 220.1 | GI:56606121  | Pde2a        | NP_001008548.1 | <u>11</u> | -0.19 | <u>7</u>  | <b>7</b>  | <u>8</u>  | <u>8</u>  | cGMP-dependent 3',5'-cyclic phosphodiesterase isoform PDE2A3 [Mus musculus]                | 105 |
| 277.1 | GI:21703842  | RtcB         | NP_663397.1    | <u>9</u>  | -0.19 | <u>7</u>  | <b>7</b>  | <u>7</u>  | <u>8</u>  | tRNA-splicing ligase RtcB homolog [Mus musculus]                                           | 55  |
| 346.1 | GI:126090857 | Fam120a      | NP_001028440.2 | <u>8</u>  | -0.19 | <u>6</u>  | <b>7</b>  | <u>7</u>  | <u>8</u>  | constitutive coactivator of PPAR-gamma-like protein 1 [Mus musculus]                       | 122 |
| 443.1 | GI:16418339  | Rpl10        | NP_443067.1    | <u>7</u>  | -0.19 | <u>5</u>  | <b>7</b>  | <u>6</u>  | <u>8</u>  | 60S ribosomal protein L10 [Mus musculus]                                                   | 25  |
| 509.1 | GI:6677809   | Rps6         | NP_033122.1    | <u>6</u>  | -0.19 | <u>4</u>  | <b>7</b>  | <u>6</u>  | <u>8</u>  | 40S ribosomal protein S6 [Mus musculus]                                                    | 29  |
| 53.1  | GI:45433560  | Kif5c        | NP_032475.2    | <u>22</u> | -0.17 | <u>16</u> | <b>16</b> | <u>17</u> | <u>18</u> | kinesin heavy chain isoform 5C [Mus musculus]                                              | 109 |
| 87.3  | GI:56699478  | Atp2b3       | NP_796210.2    | <u>11</u> | -0.17 | <u>8</u>  | <b>8</b>  | <u>9</u>  | <u>9</u>  | plasma membrane calcium ATPase 3 [Mus                                                      | 134 |

|       |              |         |                |           |       |           |           |           |           |                                                                                                         |     |
|-------|--------------|---------|----------------|-----------|-------|-----------|-----------|-----------|-----------|---------------------------------------------------------------------------------------------------------|-----|
|       |              |         |                |           |       |           |           |           |           | musculus]                                                                                               |     |
| 87.4  | GI:269784615 | Atp2b4  | NP_001161421.1 | <u>9</u>  | -0.17 | <u>8</u>  | <b>8</b>  | <u>9</u>  | <b>9</b>  | plasma membrane calcium ATPase 4 isoform a [Mus musculus]                                               | 128 |
| 239.1 | GI:19526814  | Ndufv1  | NP_598427.1    | <u>10</u> | -0.17 | <u>8</u>  | <b>8</b>  | <u>8</u>  | <b>9</b>  | NADH dehydrogenase [ubiquinone] flavoprotein 1, mitochondrial precursor [Mus musculus]                  | 51  |
| 408.1 | GI:113680120 | C1qc    | NP_031600.2    | <u>7</u>  | -0.17 | <u>5</u>  | <b>8</b>  | <u>5</u>  | <b>9</b>  | complement C1q subcomponent subunit C precursor [Mus musculus]                                          | 26  |
| 17.2  | GI:30409956  | Atp1a2  | NP_848492.1    | <u>33</u> | -0.16 | <u>26</u> | <b>35</b> | <u>27</u> | <b>39</b> | sodium/potassium-transporting ATPase subunit alpha-2 precursor [Mus musculus]                           | 112 |
| 155.1 | GI:345842402 | Etl4    | NP_001171101.2 | <u>14</u> | -0.15 | <u>9</u>  | <b>9</b>  | <u>9</u>  | <b>10</b> | sickle tail protein isoform d [Mus musculus]                                                            | 147 |
| 218.1 | GI:86476059  | Wdr37   | NP_001034477.1 | <u>11</u> | -0.15 | <u>8</u>  | <b>9</b>  | <u>10</u> | <b>10</b> | WD repeat-containing protein 37 isoform a [Mus musculus]                                                | 55  |
| 539.1 | GI:6753498   | Cox4i1  | NP_034071.1    | <u>5</u>  | -0.15 | <u>4</u>  | <b>9</b>  | <u>4</u>  | <b>10</b> | cytochrome c oxidase subunit 4 isoform 1, mitochondrial precursor [Mus musculus]                        | 20  |
| 20.1  | GI:6671561   | Ap2a1   | NP_031484.1    | <u>33</u> | -0.15 | <u>25</u> | <b>28</b> | <u>27</u> | <b>31</b> | AP-2 complex subunit alpha-1 isoform a [Mus musculus]                                                   | 108 |
| 16.9  | GI:124487419 | Krt2    | NP_034798.2    | <u>8</u>  | -0.14 | <u>6</u>  | <b>10</b> | <u>6</u>  | <b>11</b> | keratin, type II cytoskeletal 2 epidermal [Mus musculus]                                                | 71  |
| 84.1  | GI:269784721 | Sipa1l1 | NP_001161455.1 | <u>19</u> | -0.14 | <u>10</u> | <b>10</b> | <u>10</u> | <b>11</b> | signal-induced proliferation-associated 1-like protein 1 isoform 2 [Mus musculus]                       | 193 |
| 238.1 | GI:21704242  | Camkv   | NP_663596.1    | <u>10</u> | -0.14 | <u>8</u>  | <b>10</b> | <u>9</u>  | <b>11</b> | caM kinase-like vesicle-associated protein [Mus musculus]                                               | 55  |
| 42.2  | GI:83816893  | Ddx5    | NP_031866.2    | <u>21</u> | -0.13 | <u>17</u> | <b>21</b> | <u>18</u> | <b>23</b> | probable ATP-dependent RNA helicase DDX5 [Mus musculus]                                                 | 69  |
| 43.2  | GI:258547116 | Cyfp1   | NP_001158133.1 | <u>16</u> | -0.13 | <u>10</u> | <b>11</b> | <u>11</u> | <b>12</b> | cytoplasmic FMR1-interacting protein 1 isoform a [Mus musculus]                                         | 145 |
| 159.1 | GI:6754036   | Got2    | NP_034455.1    | <u>13</u> | -0.13 | <u>9</u>  | <b>11</b> | <u>10</u> | <b>12</b> | aspartate aminotransferase, mitochondrial [Mus musculus]                                                | 47  |
| 199.1 | GI:329299065 | Sept7   | NP_001192296.1 | <u>12</u> | -0.12 | <u>10</u> | <b>12</b> | <u>10</u> | <b>13</b> | septin-7 isoform 2 [Mus musculus]                                                                       | 51  |
| 205.1 | GI:6679261   | Pdha1   | NP_032836.1    | <u>11</u> | -0.12 | <u>9</u>  | <b>12</b> | <u>8</u>  | <b>13</b> | pyruvate dehydrogenase E1 component subunit alpha, somatic form, mitochondrial precursor [Mus musculus] | 43  |
| 253.1 | GI:9845253   | Hnrnp2  | NP_063921.1    | <u>10</u> | -0.12 | <u>9</u>  | <b>12</b> | <u>10</u> | <b>13</b> | heterogeneous nuclear ribonucleoprotein H2 [Mus musculus]                                               | 49  |
| 9.1   | GI:291045426 | Map1a   | NP_001166977.1 | <u>67</u> | -0.11 | <u>50</u> | <b>62</b> | <u>54</u> | <b>67</b> | microtubule-associated protein 1A isoform 2 [Mus musculus]                                              | 300 |
| 152.1 | GI:6806903   | Atp2a2  | NP_033852.1    | <u>14</u> | -0.11 | <u>11</u> | <b>13</b> | <u>12</u> | <b>14</b> | sarcoplasmic/endoplasmic reticulum calcium ATPase 2 isoform b [Mus musculus]                            | 110 |
| 16.1  | GI:112363107 | Nefm    | NP_032717.2    | <u>35</u> | -0.10 | <u>27</u> | <b>41</b> | <u>24</u> | <b>44</b> | neurofilament medium polypeptide [Mus musculus]                                                         | 96  |
| 31.2  | GI:209862923 | Crmp1   | NP_001129530.1 | <u>17</u> | -0.10 | <u>13</u> | <b>14</b> | <u>15</u> | <b>15</b> | dihydropyrimidinase-related protein 1 isoform 1 [Mus musculus]                                          | 74  |
| 65.1  | GI:50053703  | Ppp1r9b | NP_758465.2    | <u>20</u> | -0.10 | <u>13</u> | <b>14</b> | <u>14</u> | <b>15</b> | neurabin-2 [Mus musculus]                                                                               | 89  |
| 85.1  | GI:254553348 | Pfkm    | NP_001156960.1 | <u>19</u> | -0.09 | <u>13</u> | <b>15</b> | <u>14</u> | <b>16</b> | 6-phosphofructokinase, muscle type [Mus musculus]                                                       | 85  |
| 94.1  | GI:183396771 | Hspd1   | NP_034607.3    | <u>17</u> | -0.09 | <u>13</u> | <b>15</b> | <u>15</u> | <b>16</b> | 60 kDa heat shock protein, mitochondrial [Mus musculus]                                                 | 61  |
| 137.1 | GI:37674277  | Hnrnpa3 | NP_932758.1    | <u>15</u> | -0.09 | <u>10</u> | <b>15</b> | <u>12</u> | <b>16</b> | heterogeneous nuclear ribonucleoprotein A3 isoform a [Mus musculus]                                     | 40  |
| 179.1 | GI:6755963   | Vdac1   | NP_035824.1    | <u>12</u> | -0.09 | <u>11</u> | <b>15</b> | <u>11</u> | <b>16</b> | voltage-dependent anion-selective channel protein 1 [Mus musculus]                                      | 31  |
| 105.1 | GI:13384620  | Hnrnpk  | NP_079555.1    | <u>16</u> | -0.08 | <u>14</u> | <b>17</b> | <u>15</u> | <b>18</b> | heterogeneous nuclear ribonucleoprotein K [Mus musculus]                                                | 51  |
| 54.1  | GI:156255171 | Add1    | NP_001019629.2 | <u>22</u> | -0.07 | <u>17</u> | <b>20</b> | <u>19</u> | <b>21</b> | alpha-adducin isoform 1 [Mus musculus]                                                                  | 81  |
| 5.2   | GI:114326446 | Myh9    | NP_071855.2    | <u>72</u> | -0.07 | <u>55</u> | <b>63</b> | <u>59</u> | <b>66</b> | myosin-9 [Mus musculus]                                                                                 | 226 |

|       |              |          |                |           |       |           |    |           |    |                                                                                                  |     |
|-------|--------------|----------|----------------|-----------|-------|-----------|----|-----------|----|--------------------------------------------------------------------------------------------------|-----|
| 17.1  | GI:21450321  | Atp1a3   | NP_659170.1    | <u>35</u> | -0.06 | <u>30</u> | 47 | <u>30</u> | 49 | sodium/potassium-transporting ATPase subunit alpha-3 [Mus musculus]                              | 116 |
| 46.1  | GI:28916677  | Camk2a   | NP_803126.1    | <u>24</u> | -0.04 | <u>20</u> | 35 | <u>20</u> | 36 | calcium/calmodulin-dependent protein kinase type II subunit alpha isoform 2 [Mus musculus]       | 54  |
| 16.2  | GI:84000448  | Gfap     | NP_034407.2    | <u>32</u> | -0.03 | <u>24</u> | 43 | <u>23</u> | 44 | glial fibrillary acidic protein isoform 2 [Mus musculus]                                         | 50  |
| 35.2  | GI:6678467   | Tuba4a   | NP_033473.1    | <u>27</u> | -0.02 | <u>21</u> | 58 | <u>23</u> | 59 | tubulin alpha-4A chain [Mus musculus]                                                            | 50  |
| 27.2  | GI:40556608  | Hsp90ab1 | NP_032328.2    | <u>23</u> | 0.00  | <u>18</u> | 22 | <u>18</u> | 22 | heat shock protein HSP 90-beta [Mus musculus]                                                    | 83  |
| 42.1  | GI:6753620   | Ddx3x    | NP_034158.1    | <u>25</u> | 0.00  | <u>22</u> | 26 | <u>21</u> | 26 | ATP-dependent RNA helicase DDX3X [Mus musculus]                                                  | 73  |
| 43.1  | GI:84370256  | Cyfp2    | NP_598530.2    | <u>25</u> | 0.00  | <u>16</u> | 19 | <u>17</u> | 19 | cytoplasmic FMR1-interacting protein 2 [Mus musculus]                                            | 146 |
| 50.1  | GI:312032462 | Arhgef2  | NP_001185842.1 | <u>23</u> | 0.00  | <u>17</u> | 20 | <u>18</u> | 20 | rho guanine nucleotide exchange factor 2 isoform 4 [Mus musculus]                                | 108 |
| 51.1  | GI:31980648  | Atp5b    | NP_058054.2    | <u>22</u> | 0.00  | <u>18</u> | 25 | <u>16</u> | 25 | ATP synthase subunit beta, mitochondrial precursor [Mus musculus]                                | 56  |
| 52.2  | GI:6679345   | Prkeb    | NP_032881.1    | <u>16</u> | 0.00  | <u>10</u> | 10 | <u>8</u>  | 10 | protein kinase C beta type [Mus musculus]                                                        | 77  |
| 57.1  | GI:6680748   | Atp5a1   | NP_031531.1    | <u>21</u> | 0.00  | <u>18</u> | 29 | <u>18</u> | 29 | ATP synthase subunit alpha, mitochondrial precursor [Mus musculus]                               | 60  |
| 61.1  | GI:197304784 | Iqsec1   | NP_001127856.1 | <u>21</u> | 0.00  | <u>14</u> | 14 | <u>14</u> | 14 | IQ motif and SEC7 domain-containing protein 1 isoform b [Mus musculus]                           | 123 |
| 75.1  | GI:31711997  | Ppp1r9a  | NP_853626.1    | <u>19</u> | 0.00  | <u>13</u> | 13 | <u>11</u> | 13 | neurabin-1 [Mus musculus]                                                                        | 123 |
| 77.1  | GI:225543319 | Vcp      | NP_033529.3    | <u>19</u> | 0.00  | <u>11</u> | 11 | <u>11</u> | 11 | transitional endoplasmic reticulum ATPase [Mus musculus]                                         | 89  |
| 85.3  | GI:9790051   | Pfkip    | NP_062677.1    | <u>12</u> | 0.00  | <u>9</u>  | 10 | <u>9</u>  | 10 | 6-phosphofructokinase type C [Mus musculus]                                                      | 85  |
| 120.1 | GI:6671565   | Ap3d1    | NP_031486.1    | <u>15</u> | 0.00  | <u>8</u>  | 8  | <u>8</u>  | 8  | AP-3 complex subunit delta-1 [Mus musculus]                                                      | 135 |
| 134.1 | GI:148747424 | Slc25a4  | NP_031476.3    | <u>15</u> | 0.00  | <u>12</u> | 20 | <u>14</u> | 20 | ADP/ATP translocase 1 [Mus musculus]                                                             | 33  |
| 148.1 | GI:8394027   | Ppp2r1a  | NP_058587.1    | <u>14</u> | 0.00  | <u>12</u> | 13 | <u>13</u> | 13 | serine/threonine-protein phosphatase 2A 65 kDa regulatory subunit A alpha isoform [Mus musculus] | 65  |
| 161.1 | GI:148762971 | Gm996    | NP_001005424.2 | <u>13</u> | 0.00  | <u>10</u> | 10 | <u>9</u>  | 10 | uncharacterized protein C9orf172 homolog [Mus musculus]                                          | 107 |
| 164.1 | GI:154090967 | Srgap3   | NP_536696.4    | <u>13</u> | 0.00  | <u>9</u>  | 9  | <u>9</u>  | 9  | SLIT-ROBO Rho GTPase-activating protein 3 [Mus musculus]                                         | 124 |
| 165.1 | GI:33859560  | Gdi1     | NP_034403.1    | <u>13</u> | 0.00  | <u>12</u> | 12 | <u>10</u> | 12 | rab GDP dissociation inhibitor alpha [Mus musculus]                                              | 50  |
| 170.1 | GI:21489935  | Krt14    | NP_058654.1    | <u>13</u> | 0.00  | <u>9</u>  | 13 | <u>12</u> | 13 | keratin, type I cytoskeletal 14 [Mus musculus]                                                   | 53  |
| 170.3 | GI:7106335   | Krt17    | NP_034793.1    | <u>10</u> | 0.00  | <u>8</u>  | 11 | <u>10</u> | 11 | keratin, type I cytoskeletal 17 [Mus musculus]                                                   | 48  |
| 172.1 | GI:164448632 | Ncam1    | NP_001106675.1 | <u>13</u> | 0.00  | <u>11</u> | 15 | <u>12</u> | 15 | neural cell adhesion molecule 1 isoform 3 precursor [Mus musculus]                               | 119 |
| 185.1 | GI:158711686 | Slc12a5  | NP_065066.2    | <u>12</u> | 0.00  | <u>9</u>  | 9  | <u>8</u>  | 9  | solute carrier family 12 member 5 [Mus musculus]                                                 | 124 |
| 187.3 | GI:26986591  | Mark4    | NP_758483.1    | <u>4</u>  | 0.00  | <u>2</u>  | 2  | <u>2</u>  | 2  | MAP/microtubule affinity-regulating kinase 4 [Mus musculus]                                      | 83  |
| 195.1 | GI:91992157  | Aak1     | NP_001035195.1 | <u>12</u> | 0.00  | <u>10</u> | 10 | <u>10</u> | 10 | AP2 associated kinase 1 isoform 1 [Mus musculus]                                                 | 103 |
| 202.1 | GI:224809373 | Kif2a    | NP_001139251.1 | <u>12</u> | 0.00  | <u>7</u>  | 7  | <u>6</u>  | 7  | kinesin-like protein KIF2A isoform 2 [Mus musculus]                                              | 80  |
| 203.2 | GI:86990458  | Kif1b    | NP_032467.2    | <u>3</u>  | 0.00  | <u>2</u>  | 2  | <u>2</u>  | 2  | kinesin-like protein KIF1B isoform a [Mus musculus]                                              | 130 |
| 209.1 | GI:254540027 | Mdh1     | NP_032644.3    | <u>11</u> | 0.00  | <u>9</u>  | 12 | <u>10</u> | 12 | malate dehydrogenase, cytoplasmic [Mus musculus]                                                 | 36  |
| 210.1 | GI:226494598 | Wdr7     | NP_001014981.1 | <u>11</u> | 0.00  | <u>7</u>  | 7  | <u>7</u>  | 7  | WD repeat-containing protein 7 [Mus musculus]                                                    | 163 |

|       |              |               |                |           |             |          |           |          |           |                                                                                 |     |
|-------|--------------|---------------|----------------|-----------|-------------|----------|-----------|----------|-----------|---------------------------------------------------------------------------------|-----|
| 213.1 | GI:116063560 | Cntnap1       | NP_058062.2    | <u>11</u> | <u>0.00</u> | <u>8</u> | <b>8</b>  | <u>8</u> | <b>8</b>  | contactin-associated protein 1 precursor [Mus musculus]                         | 156 |
| 214.1 | GI:13937391  | Gnb2          | NP_034442.1    | <u>11</u> | <u>0.00</u> | <u>7</u> | <b>8</b>  | <u>8</u> | <b>8</b>  | guanine nucleotide-binding protein G(I)/G(S)/G(T) subunit beta-2 [Mus musculus] | 37  |
| 219.1 | GI:6753262   | Capzb         | NP_033928.1    | <u>11</u> | <u>0.00</u> | <u>8</u> | <b>10</b> | <u>8</u> | <b>10</b> | F-actin-capping protein subunit beta isoform b [Mus musculus]                   | 31  |
| 241.1 | GI:172072590 | Ncdn          | NP_036116.3    | <u>10</u> | <u>0.00</u> | <u>6</u> | <b>7</b>  | <u>6</u> | <b>7</b>  | neurochondrin [Mus musculus]                                                    | 79  |
| 248.1 | GI:211065507 | Dars          | NP_803228.2    | <u>10</u> | <u>0.00</u> | <u>7</u> | <b>7</b>  | <u>7</u> | <b>7</b>  | aspartate--tRNA ligase, cytoplasmic isoform 1 [Mus musculus]                    | 57  |
| 251.1 | GI:37360977  | Erc2          | NP_808482.2    | <u>10</u> | <u>0.00</u> | <u>7</u> | <b>7</b>  | <u>7</u> | <b>7</b>  | ERC protein 2 [Mus musculus]                                                    | 115 |
| 252.1 | GI:51492004  | Trim46        | NP_898858.1    | <u>10</u> | <u>0.00</u> | <u>7</u> | <b>7</b>  | <u>6</u> | <b>7</b>  | tripartite motif-containing protein 46 isoform 2 [Mus musculus]                 | 83  |
| 255.1 | GI:84662736  | Rpl6          | NP_035420.2    | <u>10</u> | <u>0.00</u> | <u>9</u> | <b>9</b>  | <u>8</u> | <b>9</b>  | 60S ribosomal protein L6 [Mus musculus]                                         | 33  |
| 276.1 | GI:22122825  | Actr2         | NP_666355.1    | <u>9</u>  | <u>0.00</u> | <u>8</u> | <b>8</b>  | <u>8</u> | <b>8</b>  | actin-related protein 2 [Mus musculus]                                          | 45  |
| 282.1 | GI:144922638 | Ktn1          | NP_032503.2    | <u>9</u>  | <u>0.00</u> | <u>5</u> | <b>5</b>  | <u>5</u> | <b>5</b>  | kinectin [Mus musculus]                                                         | 152 |
| 284.1 | GI:114145505 | Hsph1         | NP_038587.2    | <u>9</u>  | <u>0.00</u> | <u>6</u> | <b>6</b>  | <u>6</u> | <b>6</b>  | heat shock protein 105 kDa [Mus musculus]                                       | 96  |
| 289.1 | GI:24233554  | Slc1a3        | NP_683740.1    | <u>9</u>  | <u>0.00</u> | <u>7</u> | <b>16</b> | <u>9</u> | <b>16</b> | excitatory amino acid transporter 1 [Mus musculus]                              | 60  |
| 308.1 | GI:6753960   | Gda           | NP_034396.1    | <u>8</u>  | <u>0.00</u> | <u>5</u> | <b>5</b>  | <u>5</u> | <b>5</b>  | guanine deaminase [Mus musculus]                                                | 51  |
| 311.1 | GI:6679935   | Gap43         | NP_032109.1    | <u>8</u>  | <u>0.00</u> | <u>6</u> | <b>7</b>  | <u>6</u> | <b>7</b>  | neuromodulin [Mus musculus]                                                     | 24  |
| 324.1 | GI:227500281 | EtfA          | NP_663590.3    | <u>8</u>  | <u>0.00</u> | <u>4</u> | <b>4</b>  | <u>4</u> | <b>4</b>  | electron transfer flavoprotein subunit alpha, mitochondrial [Mus musculus]      | 35  |
| 326.1 | GI:21362303  | Snap47        | NP_653104.1    | <u>8</u>  | <u>0.00</u> | <u>6</u> | <b>6</b>  | <u>6</u> | <b>6</b>  | synaptosomal-associated protein 47 [Mus musculus]                               | 46  |
| 335.1 | GI:13386026  | 2700060E02Rik | NP_080804.1    | <u>8</u>  | <u>0.00</u> | <u>6</u> | <b>6</b>  | <u>6</u> | <b>6</b>  | UPF0568 protein C14orf166 homolog [Mus musculus]                                | 28  |
| 337.1 | GI:119120859 | Syne1         | NP_700448.2    | <u>8</u>  | <u>0.00</u> | <u>5</u> | <b>5</b>  | <u>5</u> | <b>5</b>  | nesprin-1 isoform 1 [Mus musculus]                                              | 165 |
| 339.1 | GI:112363072 | Arpc2         | NP_083987.1    | <u>8</u>  | <u>0.00</u> | <u>5</u> | <b>5</b>  | <u>5</u> | <b>5</b>  | actin-related protein 2/3 complex subunit 2 [Mus musculus]                      | 34  |
| 347.1 | GI:158854037 | Nbea          | NP_085098.1    | <u>8</u>  | <u>0.00</u> | <u>4</u> | <b>4</b>  | <u>4</u> | <b>4</b>  | neurobeachin [Mus musculus]                                                     | 327 |
| 348.1 | GI:8567402   | Srsf3         | NP_038691.1    | <u>8</u>  | <u>0.00</u> | <u>5</u> | <b>8</b>  | <u>6</u> | <b>8</b>  | serine/arginine-rich splicing factor 3 [Mus musculus]                           | 19  |
| 353.1 | GI:239985643 | Palm          | NP_001155219.1 | <u>8</u>  | <u>0.00</u> | <u>5</u> | <b>5</b>  | <u>5</u> | <b>5</b>  | paralemmin-1 isoform 2 [Mus musculus]                                           | 37  |
| 358.1 | GI:6680834   | Calm3         | NP_031616.1    | <u>8</u>  | <u>0.00</u> | <u>5</u> | <b>9</b>  | <u>6</u> | <b>9</b>  | calmodulin [Mus musculus]                                                       | 17  |
| 364.2 | GI:52345394  | Actr3b        | NP_001004365.1 | <u>4</u>  | <u>0.00</u> | <u>4</u> | <b>4</b>  | <u>4</u> | <b>4</b>  | actin-related protein 3B [Mus musculus]                                         | 48  |
| 368.1 | GI:294831970 | Slc25a22      | NP_001171047.1 | <u>8</u>  | <u>0.00</u> | <u>5</u> | <b>6</b>  | <u>5</u> | <b>6</b>  | mitochondrial glutamate carrier 1 [Mus musculus]                                | 35  |
| 374.1 | GI:116256514 | Hnrnpd        | NP_031542.2    | <u>8</u>  | <u>0.00</u> | <u>6</u> | <b>7</b>  | <u>6</u> | <b>7</b>  | heterogeneous nuclear ribonucleoprotein D0 isoform c [Mus musculus]             | 33  |
| 401.1 | GI:134949013 | Rock2         | NP_033098.2    | <u>7</u>  | <u>0.00</u> | <u>4</u> | <b>4</b>  | <u>4</u> | <b>4</b>  | rho-associated protein kinase 2 [Mus musculus]                                  | 161 |
| 406.1 | GI:120953219 | Soga3         | NP_080414.2    | <u>7</u>  | <u>0.00</u> | <u>6</u> | <b>6</b>  | <u>6</u> | <b>6</b>  | protein SOGA3 precursor [Mus musculus]                                          | 103 |
| 419.1 | GI:145587082 | Trio          | NP_001074771.1 | <u>7</u>  | <u>0.00</u> | <u>4</u> | <b>4</b>  | <u>4</u> | <b>4</b>  | triple functional domain protein [Mus musculus]                                 | 348 |
| 420.1 | GI:6679439   | Ppia          | NP_032933.1    | <u>7</u>  | <u>0.00</u> | <u>5</u> | <b>7</b>  | <u>5</u> | <b>7</b>  | peptidyl-prolyl cis-trans isomerase A [Mus musculus]                            | 18  |
| 422.1 | GI:254939694 | U2af1         | NP_077149.2    | <u>7</u>  | <u>0.00</u> | <u>3</u> | <b>5</b>  | <u>5</u> | <b>5</b>  | splicing factor U2AF 35 kDa subunit isoform 1 [Mus musculus]                    | 28  |



|       |              |          |                |          |             |          |          |          |          |                                                                                              |     |
|-------|--------------|----------|----------------|----------|-------------|----------|----------|----------|----------|----------------------------------------------------------------------------------------------|-----|
| 427.2 | GI:21489933  | Mapk3    | NP_036082.1    | <u>3</u> | <u>0.00</u> | <u>2</u> | <b>2</b> | <u>2</u> | <u>2</u> | mitogen-activated protein kinase 3 [Mus musculus]                                            | 43  |
| 435.1 | GI:319655703 | Ccdc136  | NP_663549.3    | <u>7</u> | <u>0.00</u> | <u>4</u> | <b>4</b> | <u>4</u> | <u>4</u> | coiled-coil domain-containing protein 136 isoform 1 [Mus musculus]                           | 117 |
| 442.1 | GI:170014725 | Bdh1     | NP_001116155.1 | <u>7</u> | <u>0.00</u> | <u>6</u> | <b>6</b> | <u>6</u> | <u>6</u> | D-beta-hydroxybutyrate dehydrogenase, mitochondrial precursor [Mus musculus]                 | 38  |
| 444.1 | GI:126723792 | Snx27    | NP_001075953.1 | <u>7</u> | <u>0.00</u> | <u>7</u> | <b>7</b> | <u>7</u> | <u>7</u> | sorting nexin-27 isoform 1 [Mus musculus]                                                    | 61  |
| 450.1 | GI:7242138   | Atp1b2   | NP_038201.1    | <u>6</u> | <u>0.00</u> | <u>5</u> | <b>5</b> | <u>5</u> | <u>5</u> | sodium/potassium-transporting ATPase subunit beta-2 [Mus musculus]                           | 33  |
| 453.1 | GI:6680047   | Gnb211   | NP_032169.1    | <u>6</u> | <u>0.00</u> | <u>4</u> | <b>4</b> | <u>4</u> | <u>4</u> | guanine nucleotide-binding protein subunit beta-2-like 1 [Mus musculus]                      | 35  |
| 459.1 | GI:39930509  | Mapre3   | NP_579928.1    | <u>6</u> | <u>0.00</u> | <u>5</u> | <b>5</b> | <u>4</u> | <u>5</u> | microtubule-associated protein RP/EB family member 3 [Mus musculus]                          | 32  |
| 465.1 | GI:27532946  | Gnaz     | NP_034441.1    | <u>6</u> | <u>0.00</u> | <u>4</u> | <b>4</b> | <u>4</u> | <u>4</u> | guanine nucleotide-binding protein G(z) subunit alpha [Mus musculus]                         | 41  |
| 466.1 | GI:226443091 | Hnrnpa0  | NP_084148.1    | <u>6</u> | <u>0.00</u> | <u>5</u> | <b>5</b> | <u>5</u> | <u>5</u> | heterogeneous nuclear ribonucleoprotein A0 [Mus musculus]                                    | 31  |
| 467.1 | GI:22122427  | Phyhip   | NP_666093.1    | <u>6</u> | <u>0.00</u> | <u>3</u> | <b>3</b> | <u>3</u> | <u>3</u> | phytanoyl-CoA hydroxylase-interacting protein [Mus musculus]                                 | 38  |
| 485.1 | GI:7710062   | Mpp2     | NP_057904.1    | <u>6</u> | <u>0.00</u> | <u>4</u> | <b>4</b> | <u>4</u> | <u>4</u> | MAGUK p55 subfamily member 2 [Mus musculus]                                                  | 62  |
| 487.1 | GI:145301549 | Hba-a2   | NP_001077424.1 | <u>6</u> | <u>0.00</u> | <u>4</u> | <b>9</b> | <u>4</u> | <u>9</u> | hemoglobin alpha, adult chain 2 [Mus musculus]                                               | 15  |
| 488.1 | GI:61098124  | Fam98b   | NP_080896.2    | <u>6</u> | <u>0.00</u> | <u>5</u> | <b>5</b> | <u>5</u> | <u>5</u> | protein FAM98B [Mus musculus]                                                                | 45  |
| 495.1 | GI:256985110 | Bcas1    | NP_084091.2    | <u>6</u> | <u>0.00</u> | <u>4</u> | <b>4</b> | <u>4</u> | <u>4</u> | breast carcinoma-amplified sequence 1 homolog isoform 1 [Mus musculus]                       | 67  |
| 507.1 | GI:6679593   | Rab3a    | NP_033027.1    | <u>6</u> | <u>0.00</u> | <u>4</u> | <b>5</b> | <u>5</u> | <u>5</u> | ras-related protein Rab-3A [Mus musculus]                                                    | 25  |
| 508.1 | GI:6678365   | Ran      | NP_033417.1    | <u>6</u> | <u>0.00</u> | <u>3</u> | <b>3</b> | <u>3</u> | <u>3</u> | GTP-binding nuclear protein Ran [Mus musculus]                                               | 24  |
| 513.1 | GI:34328406  | Arhgap44 | NP_778168.2    | <u>6</u> | <u>0.00</u> | <u>4</u> | <b>4</b> | <u>4</u> | <u>4</u> | rho GTPase-activating protein 44 isoform 2 [Mus musculus]                                    | 83  |
| 514.2 | GI:7242197   | Psmb1    | NP_035315.1    | <u>2</u> | <u>0.00</u> | <u>1</u> | <b>1</b> | <u>1</u> | <u>1</u> | proteasome subunit beta type-1 precursor [Mus musculus]                                      | 26  |
| 515.1 | GI:31088914  | Anks1b   | NP_852063.1    | <u>6</u> | <u>0.00</u> | <u>4</u> | <b>5</b> | <u>4</u> | <u>5</u> | ankyrin repeat and sterile alpha motif domain-containing protein 1B isoform 2 [Mus musculus] | 48  |
| 526.1 | GI:86262142  | Rbm14    | NP_063922.2    | <u>5</u> | <u>0.00</u> | <u>4</u> | <b>4</b> | <u>4</u> | <u>4</u> | RNA-binding protein 14 [Mus musculus]                                                        | 69  |
| 545.1 | GI:45592934  | Rac1     | NP_033033.1    | <u>5</u> | <u>0.00</u> | <u>3</u> | <b>3</b> | <u>3</u> | <u>3</u> | ras-related C3 botulinum toxin substrate 1 precursor [Mus musculus]                          | 21  |
| 546.1 | GI:40789268  | Ncan     | NP_031815.2    | <u>5</u> | <u>0.00</u> | <u>4</u> | <b>4</b> | <u>4</u> | <u>4</u> | neurocan core protein precursor [Mus musculus]                                               | 137 |
| 547.1 | GI:38016174  | Snph     | NP_937857.1    | <u>5</u> | <u>0.00</u> | <u>5</u> | <b>5</b> | <u>4</u> | <u>5</u> | syntaphilin [Mus musculus]                                                                   | 57  |
| 553.1 | GI:30519969  | Poldip3  | NP_848742.1    | <u>5</u> | <u>0.00</u> | <u>1</u> | <b>1</b> | <u>1</u> | <u>1</u> | polymerase delta-interacting protein 3 [Mus musculus]                                        | 46  |
| 557.1 | GI:255069795 | Vars     | NP_035820.3    | <u>5</u> | <u>0.00</u> | <u>3</u> | <b>3</b> | <u>3</u> | <u>3</u> | valine--tRNA ligase [Mus musculus]                                                           | 140 |
| 565.1 | GI:219842353 | Ago2     | NP_694818.3    | <u>5</u> | <u>0.00</u> | <u>3</u> | <b>3</b> | <u>3</u> | <u>3</u> | protein argonaute-2 [Mus musculus]                                                           | 97  |
| 567.1 | GI:21426889  | Rps11    | NP_038753.1    | <u>5</u> | <u>0.00</u> | <u>4</u> | <b>5</b> | <u>4</u> | <u>5</u> | 40S ribosomal protein S11 [Mus musculus]                                                     | 18  |
| 578.1 | GI:158854016 | Skp1a    | NP_035673.3    | <u>5</u> | <u>0.00</u> | <u>4</u> | <b>6</b> | <u>5</u> | <u>6</u> | S-phase kinase-associated protein 1 [Mus musculus]                                           | 19  |
| 592.1 | GI:119433663 | Luzp1    | NP_077772.2    | <u>5</u> | <u>0.00</u> | <u>3</u> | <b>3</b> | <u>3</u> | <u>3</u> | leucine zipper protein 1 [Mus musculus]                                                      | 119 |
| 594.1 | GI:110625902 | Napg     | NP_082293.1    | <u>5</u> | <u>0.00</u> | <u>4</u> | <b>4</b> | <u>4</u> | <u>4</u> | gamma-soluble NSF attachment protein [Mus musculus]                                          | 35  |
| 597.1 | GI:218156282 | Slc17a7  | NP_892038.2    | <u>5</u> | <u>0.00</u> | <u>3</u> | <b>3</b> | <u>3</u> | <u>3</u> | vesicular glutamate transporter 1 [Mus musculus]                                             | 62  |

|       |              |         |                |   |      |   |   |   |   |                                                                                                            |     |
|-------|--------------|---------|----------------|---|------|---|---|---|---|------------------------------------------------------------------------------------------------------------|-----|
| 597.2 | GI:188219544 | Slc17a6 | NP_543129.3    | 4 | 0.00 | 2 | 2 | 2 | 2 | vesicular glutamate transporter 2 [Mus musculus]                                                           | 65  |
| 598.1 | GI:148664250 | Hnrnpdl | NP_057899.2    | 5 | 0.00 | 4 | 5 | 4 | 5 | heterogeneous nuclear ribonucleoprotein D-like [Mus musculus]                                              | 46  |
| 603.1 | GI:23956396  | Erlin2  | NP_705820.1    | 5 | 0.00 | 4 | 4 | 4 | 4 | erlin-2 [Mus musculus]                                                                                     | 38  |
| 604.1 | GI:113866024 | Rab5c   | NP_077776.2    | 5 | 0.00 | 3 | 3 | 3 | 3 | ras-related protein Rab-5C [Mus musculus]                                                                  | 23  |
| 604.2 | GI:28916687  | Rab5b   | NP_803130.1    | 4 | 0.00 | 2 | 2 | 2 | 2 | ras-related protein Rab-5B [Mus musculus]                                                                  | 24  |
| 609.1 | GI:6754976   | Prdx1   | NP_035164.1    | 5 | 0.00 | 3 | 3 | 3 | 3 | peroxiredoxin-1 [Mus musculus]                                                                             | 22  |
| 610.2 | GI:148747467 | Kcnab1  | NP_034727.3    | 3 | 0.00 | 2 | 2 | 2 | 2 | voltage-gated potassium channel subunit beta-1 [Mus musculus]                                              | 45  |
| 612.1 | GI:94536791  | Flot2   | NP_001035493.1 | 5 | 0.00 | 3 | 3 | 3 | 3 | flotillin-2 isoform 1 [Mus musculus]                                                                       | 47  |
| 627.1 | GI:407263600 | Gm9385  | XP_003945506.1 | 5 | 0.00 | 4 | 4 | 3 | 4 | PREDICTED: 60S ribosomal protein L24-like [Mus musculus]                                                   | 12  |
| 629.1 | GI:33239421  | Ubap2l  | NP_082751.1    | 5 | 0.00 | 3 | 3 | 3 | 3 | ubiquitin-associated protein 2-like isoform 1 [Mus musculus]                                               | 117 |
| 630.1 | GI:31542143  | Rhoa    | NP_058082.2    | 5 | 0.00 | 4 | 5 | 4 | 5 | transforming protein RhoA precursor [Mus musculus]                                                         | 22  |
| 630.2 | GI:6680726   | Rhob    | NP_031509.1    | 4 | 0.00 | 2 | 3 | 3 | 3 | rho-related GTP-binding protein RhoB precursor [Mus musculus]                                              | 22  |
| 635.1 | GI:255069776 | Camsap3 | NP_081447.2    | 5 | 0.00 | 3 | 3 | 3 | 3 | calmodulin-regulated spectrin-associated protein 3 isoform 2 [Mus musculus]                                | 135 |
| 637.1 | GI:219276601 | Nars    | NP_001136422.1 | 5 | 0.00 | 5 | 5 | 5 | 5 | asparagine--tRNA ligase, cytoplasmic isoform 1 [Mus musculus]                                              | 64  |
| 640.1 | GI:13385036  | Rpl15   | NP_079862.1    | 5 | 0.00 | 4 | 5 | 4 | 5 | 60S ribosomal protein L15 [Mus musculus]                                                                   | 24  |
| 643.1 | GI:110625886 | Ppp2r2a | NP_082308.1    | 5 | 0.00 | 3 | 3 | 3 | 3 | serine/threonine-protein phosphatase 2A 55 kDa regulatory subunit B alpha isoform isoform 1 [Mus musculus] | 52  |
| 651.1 | GI:83649715  | Brsk1   | NP_001003920.2 | 4 | 0.00 | 3 | 3 | 3 | 3 | serine/threonine-protein kinase BRSK1 isoform 1 [Mus musculus]                                             | 85  |
| 654.1 | GI:7106277   | Csnk2b  | NP_034105.1    | 4 | 0.00 | 3 | 3 | 3 | 3 | casein kinase II subunit beta [Mus musculus]                                                               | 25  |
| 656.1 | GI:6755376   | Rps7    | NP_035430.1    | 4 | 0.00 | 3 | 3 | 3 | 3 | 40S ribosomal protein S7 [Mus musculus]                                                                    | 22  |
| 662.1 | GI:6680309   | Hspe1   | NP_032329.1    | 4 | 0.00 | 3 | 5 | 4 | 5 | 10 kDa heat shock protein, mitochondrial [Mus musculus]                                                    | 11  |
| 663.1 | GI:6680091   | Grid2   | NP_032193.1    | 4 | 0.00 | 2 | 2 | 2 | 2 | glutamate receptor ionotropic, delta-2 precursor [Mus musculus]                                            | 113 |
| 665.1 | GI:6678794   | Map2k1  | NP_032953.1    | 4 | 0.00 | 4 | 4 | 3 | 4 | dual specificity mitogen-activated protein kinase kinase 1 [Mus musculus]                                  | 43  |
| 667.1 | GI:6677785   | Rpl37a  | NP_033110.1    | 4 | 0.00 | 3 | 3 | 3 | 3 | 60S ribosomal protein L37a [Mus musculus]                                                                  | 10  |
| 678.1 | GI:33469051  | Tppp    | NP_878259.1    | 4 | 0.00 | 4 | 4 | 4 | 4 | tubulin polymerization-promoting protein [Mus musculus]                                                    | 24  |
| 683.1 | GI:300795817 | Lancl1  | NP_001177914.1 | 4 | 0.00 | 2 | 2 | 2 | 2 | lanC-like protein 1 [Mus musculus]                                                                         | 45  |
| 689.1 | GI:255958286 | Suclg1  | NP_063932.2    | 4 | 0.00 | 4 | 7 | 4 | 7 | succinyl-CoA ligase [ADP/GDP-forming] subunit alpha, mitochondrial precursor [Mus musculus]                | 36  |
| 690.1 | GI:254675270 | Rps5    | NP_033121.2    | 4 | 0.00 | 4 | 4 | 4 | 4 | 40S ribosomal protein S5 [Mus musculus]                                                                    | 23  |
| 692.1 | GI:23956058  | Plp1    | NP_035253.1    | 4 | 0.00 | 4 | 5 | 4 | 5 | myelin proteolipid protein [Mus musculus]                                                                  | 30  |
| 693.1 | GI:23943838  | Slc25a1 | NP_694790.1    | 4 | 0.00 | 2 | 2 | 2 | 2 | solute carrier family 25, member 1 [Mus musculus]                                                          | 34  |
| 695.1 | GI:23346461  | Ndufs2  | NP_694704.1    | 4 | 0.00 | 3 | 3 | 3 | 3 | NADH dehydrogenase [ubiquinone] iron-sulfur protein 2, mitochondrial precursor [Mus musculus]              | 53  |

|       |              |                   |                |          |             |          |          |          |          |                                                                                                    |     |
|-------|--------------|-------------------|----------------|----------|-------------|----------|----------|----------|----------|----------------------------------------------------------------------------------------------------|-----|
| 699.1 | GI:222418589 | 3110047P<br>20Rik | NP_795980.2    | <u>4</u> | <u>0.00</u> | <u>2</u> | <b>2</b> | <u>2</u> | <b>2</b> | leucine-rich repeat and WD repeat-containing protein KIAA1239 [Mus musculus]                       | 197 |
| 700.1 | GI:21624609  | Bphl              | NP_080788.1    | <u>4</u> | <u>0.00</u> | <u>2</u> | <b>2</b> | <u>2</u> | <b>2</b> | valacyclovir hydrolase precursor [Mus musculus]                                                    | 33  |
| 712.1 | GI:158187517 | Akap5             | NP_001094941.1 | <u>4</u> | <u>0.00</u> | <u>3</u> | <b>3</b> | <u>3</u> | <b>3</b> | A-kinase anchor protein 5 [Mus musculus]                                                           | 79  |
| 724.1 | GI:112293279 | L1cam             | NP_032504.3    | <u>4</u> | <u>0.00</u> | <u>2</u> | <b>2</b> | <u>2</u> | <b>2</b> | neural cell adhesion molecule L1 precursor [Mus musculus]                                          | 141 |
| 734.1 | GI:31981945  | Rpl13a            | NP_033464.2    | <u>4</u> | <u>0.00</u> | <u>2</u> | <b>3</b> | <u>2</u> | <b>3</b> | 60S ribosomal protein L13a [Mus musculus]                                                          | 23  |
| 735.2 | GI:227908819 | Tarsl2            | NP_758514.2    | <u>3</u> | <u>0.00</u> | <u>3</u> | <b>3</b> | <u>3</u> | <b>3</b> | probable threonine--tRNA ligase 2, cytoplasmic [Mus musculus]                                      | 91  |
| 740.1 | GI:226442901 | Larp1             | NP_082727.1    | <u>4</u> | <u>0.00</u> | <u>3</u> | <b>3</b> | <u>3</u> | <b>3</b> | la-related protein 1 [Mus musculus]                                                                | 121 |
| 742.1 | GI:6679299   | Phb               | NP_032857.1    | <u>4</u> | <u>0.00</u> | <u>4</u> | <b>4</b> | <u>4</u> | <b>4</b> | prohibitin [Mus musculus]                                                                          | 30  |
| 743.1 | GI:6678551   | Vamp2             | NP_033523.1    | <u>4</u> | <u>0.00</u> | <u>3</u> | <b>4</b> | <u>3</u> | <b>4</b> | vesicle-associated membrane protein 2 [Mus musculus]                                               | 13  |
| 747.1 | GI:238550188 | Ndel1             | NP_076157.2    | <u>4</u> | <u>0.00</u> | <u>2</u> | <b>2</b> | <u>2</u> | <b>2</b> | nuclear distribution protein nudE-like 1 [Mus musculus]                                            | 38  |
| 753.1 | GI:548961839 | Cask              | NP_001271433.1 | <u>4</u> | <u>0.00</u> | <u>3</u> | <b>3</b> | <u>3</u> | <b>3</b> | peripheral plasma membrane protein CASK isoform 2 [Mus musculus]                                   | 100 |
| 757.1 | GI:213688406 | Dynll1            | NP_062656.3    | <u>4</u> | <u>0.00</u> | <u>4</u> | <b>4</b> | <u>3</u> | <b>4</b> | dynein light chain 1, cytoplasmic [Mus musculus]                                                   | 10  |
| 759.1 | GI:7949045   | H2afz             | NP_058030.1    | <u>4</u> | <u>0.00</u> | <u>3</u> | <b>4</b> | <u>2</u> | <b>4</b> | histone H2A.Z [Mus musculus]                                                                       | 14  |
| 763.1 | GI:68226433  | Hist2h2b<br>b     | NP_783597.2    | <u>4</u> | <u>0.00</u> | <u>3</u> | <b>5</b> | <u>4</u> | <b>5</b> | histone H2B type 2-B [Mus musculus]                                                                | 14  |
| 768.1 | GI:56790900  | Adam22            | NP_001007222.1 | <u>4</u> | <u>0.00</u> | <u>3</u> | <b>3</b> | <u>3</u> | <b>3</b> | disintegrin and metalloproteinase domain-containing protein 22 isoform b precursor [Mus musculus]  | 91  |
| 774.2 | GI:30794476  | Prkar1a           | NP_068680.1    | <u>3</u> | <u>0.00</u> | <u>1</u> | <b>1</b> | <u>1</u> | <b>1</b> | cAMP-dependent protein kinase type I-alpha regulatory subunit [Mus musculus]                       | 43  |
| 776.2 | GI:117968623 | Cacna1e           | NP_033912.2    | <u>2</u> | <u>0.00</u> | <u>2</u> | <b>2</b> | <u>2</u> | <b>2</b> | voltage-dependent R-type calcium channel subunit alpha-1E [Mus musculus]                           | 257 |
| 785.1 | GI:205361114 | Dnaja3            | NP_001128584.1 | <u>4</u> | <u>0.00</u> | <u>2</u> | <b>2</b> | <u>2</u> | <b>2</b> | dnaJ homolog subfamily A member 3, mitochondrial isoform 2 [Mus musculus]                          | 49  |
| 786.1 | GI:197333687 | Vcan              | NP_001127946.1 | <u>4</u> | <u>0.00</u> | <u>2</u> | <b>2</b> | <u>2</u> | <b>2</b> | versican core protein isoform 3 precursor [Mus musculus]                                           | 178 |
| 794.1 | GI:8567400   | Rpl27             | NP_035419.1    | <u>3</u> | <u>0.00</u> | <u>2</u> | <b>3</b> | <u>2</u> | <b>3</b> | 60S ribosomal protein L27 [Mus musculus]                                                           | 16  |
| 795.1 | GI:83715998  | Atp5k             | NP_031533.2    | <u>3</u> | <u>0.00</u> | <u>2</u> | <b>2</b> | <u>2</u> | <b>2</b> | ATP synthase subunit e, mitochondrial [Mus musculus]                                               | 8   |
| 801.1 | GI:6755382   | Ruvbl2            | NP_035434.1    | <u>3</u> | <u>0.00</u> | <u>2</u> | <b>2</b> | <u>2</u> | <b>2</b> | ruvB-like 2 [Mus musculus]                                                                         | 51  |
| 804.1 | GI:6755004   | Aifm1             | NP_036149.1    | <u>3</u> | <u>0.00</u> | <u>2</u> | <b>2</b> | <u>2</u> | <b>2</b> | apoptosis-inducing factor 1, mitochondrial precursor [Mus musculus]                                | 67  |
| 805.1 | GI:6753590   | Cyp46a1           | NP_034140.1    | <u>3</u> | <u>0.00</u> | <u>2</u> | <b>2</b> | <u>2</u> | <b>2</b> | cholesterol 24-hydroxylase precursor [Mus musculus]                                                | 57  |
| 806.1 | GI:6753540   | Csnk2a2           | NP_034104.1    | <u>3</u> | <u>0.00</u> | <u>1</u> | <b>1</b> | <u>1</u> | <b>1</b> | casein kinase II subunit alpha' [Mus musculus]                                                     | 41  |
| 808.1 | GI:6753164   | Bckdk             | NP_033869.1    | <u>3</u> | <u>0.00</u> | <u>2</u> | <b>2</b> | <u>2</u> | <b>2</b> | [3-methyl-2-oxobutanoate dehydrogenase [lipoamide]] kinase, mitochondrial precursor [Mus musculus] | 47  |
| 809.1 | GI:6681225   | Drg1              | NP_031905.1    | <u>3</u> | <u>0.00</u> | <u>2</u> | <b>2</b> | <u>2</u> | <b>2</b> | developmentally-regulated GTP-binding protein 1 [Mus musculus]                                     | 40  |
| 810.1 | GI:6681079   | Ctsb              | NP_031824.1    | <u>3</u> | <u>0.00</u> | <u>2</u> | <b>2</b> | <u>2</u> | <b>2</b> | cathepsin B preproprotein [Mus musculus]                                                           | 37  |
| 813.1 | GI:6679227   | Pcp4              | NP_032817.1    | <u>3</u> | <u>0.00</u> | <u>3</u> | <b>4</b> | <u>3</u> | <b>4</b> | Purkinje cell protein 4 [Mus musculus]                                                             | 7   |

|       |              |           |                |          |             |          |          |          |          |                                                                                                          |     |
|-------|--------------|-----------|----------------|----------|-------------|----------|----------|----------|----------|----------------------------------------------------------------------------------------------------------|-----|
| 822.1 | GI:50234896  | Ube2o     | NP_776116.2    | <u>3</u> | <u>0.00</u> | <u>2</u> | <b>2</b> | <u>2</u> | <b>2</b> | ubiquitin-conjugating enzyme E2 O [Mus musculus]                                                         | 141 |
| 827.1 | GI:38198665  | Nsfl1c    | NP_938085.1    | <u>3</u> | <u>0.00</u> | <u>2</u> | <b>2</b> | <u>2</u> | <b>2</b> | NSFL1 cofactor p47 [Mus musculus]                                                                        | 41  |
| 831.1 | GI:31981273  | Cndp2     | NP_075638.2    | <u>3</u> | <u>0.00</u> | <u>2</u> | <b>2</b> | <u>2</u> | <b>2</b> | cytosolic non-specific dipeptidase [Mus musculus]                                                        | 53  |
| 832.1 | GI:31980922  | Eef1b2    | NP_061266.2    | <u>3</u> | <u>0.00</u> | <u>3</u> | <b>3</b> | <u>3</u> | <b>3</b> | elongation factor 1-beta [Mus musculus]                                                                  | 25  |
| 834.1 | GI:31560239  | Asrgl1    | NP_079886.2    | <u>3</u> | <u>0.00</u> | <u>2</u> | <b>2</b> | <u>2</u> | <b>2</b> | isoaspartyl peptidase/L-asparaginase [Mus musculus]                                                      | 34  |
| 839.1 | GI:29789289  | Echs1     | NP_444349.1    | <u>3</u> | <u>0.00</u> | <u>2</u> | <b>2</b> | <u>2</u> | <b>2</b> | enoyl-CoA hydratase, mitochondrial precursor [Mus musculus]                                              | 31  |
| 842.1 | GI:257153319 | Ildr2     | NP_001158000.1 | <u>3</u> | <u>0.00</u> | <u>2</u> | <b>2</b> | <u>2</u> | <b>2</b> | Lisch-like [Mus musculus]                                                                                | 73  |
| 851.1 | GI:225579033 | Idh2      | NP_766599.2    | <u>3</u> | <u>0.00</u> | <u>2</u> | <b>2</b> | <u>2</u> | <b>2</b> | isocitrate dehydrogenase [NADP], mitochondrial precursor [Mus musculus]                                  | 51  |
| 852.1 | GI:224282176 | Arhgef33  | NP_001138924.1 | <u>3</u> | <u>0.00</u> | <u>3</u> | <b>3</b> | <u>3</u> | <b>3</b> | rho guanine nucleotide exchange factor 33 [Mus musculus]                                                 | 95  |
| 863.1 | GI:19527388  | Otub1     | NP_598911.1    | <u>3</u> | <u>0.00</u> | <u>2</u> | <b>2</b> | <u>2</u> | <b>2</b> | ubiquitin thioesterase OTUB1 [Mus musculus]                                                              | 31  |
| 864.1 | GI:19527168  | Psip1     | NP_598709.1    | <u>3</u> | <u>0.00</u> | <u>2</u> | <b>3</b> | <u>3</u> | <b>3</b> | PC4 and SFRS1-interacting protein [Mus musculus]                                                         | 60  |
| 871.1 | GI:16716343  | Cox6c     | NP_444301.1    | <u>3</u> | <u>0.00</u> | <u>2</u> | <b>2</b> | <u>2</u> | <b>2</b> | cytochrome c oxidase subunit 6C [Mus musculus]                                                           | 8   |
| 883.1 | GI:148747243 | Lmtk3     | NP_001005511.2 | <u>3</u> | <u>0.00</u> | <u>1</u> | <b>1</b> | <u>1</u> | <b>1</b> | serine/threonine-protein kinase LMTK3 precursor [Mus musculus]                                           | 151 |
| 884.1 | GI:14389431  | Stip1     | NP_058017.1    | <u>3</u> | <u>0.00</u> | <u>3</u> | <b>3</b> | <u>3</u> | <b>3</b> | stress-induced-phosphoprotein 1 [Mus musculus]                                                           | 63  |
| 889.1 | GI:13385168  | Uqcrfs1   | NP_079986.1    | <u>3</u> | <u>0.00</u> | <u>2</u> | <b>2</b> | <u>2</u> | <b>2</b> | cytochrome b-c1 complex subunit Rieske, mitochondrial [Mus musculus]                                     | 29  |
| 890.1 | GI:13385044  | Rpl35     | NP_079868.1    | <u>3</u> | <u>0.00</u> | <u>2</u> | <b>2</b> | <u>2</u> | <b>2</b> | 60S ribosomal protein L35 [Mus musculus]                                                                 | 15  |
| 891.1 | GI:13385010  | Mgst3     | NP_079845.1    | <u>3</u> | <u>0.00</u> | <u>3</u> | <b>3</b> | <u>3</u> | <b>3</b> | microsomal glutathione S-transferase 3 [Mus musculus]                                                    | 17  |
| 892.1 | GI:12963569  | Ppp1r7    | NP_075689.1    | <u>3</u> | <u>0.00</u> | <u>1</u> | <b>1</b> | <u>1</u> | <b>1</b> | protein phosphatase 1 regulatory subunit 7 [Mus musculus]                                                | 41  |
| 916.1 | GI:10092608  | Gstp1     | NP_038569.1    | <u>3</u> | <u>0.00</u> | <u>2</u> | <b>2</b> | <u>2</u> | <b>2</b> | glutathione S-transferase P 1 [Mus musculus]                                                             | 24  |
| 918.1 | GI:6754160   | Hax1      | NP_035956.1    | <u>3</u> | <u>0.00</u> | <u>2</u> | <b>2</b> | <u>2</u> | <b>2</b> | HCLS1-associated protein X-1 isoform 1 [Mus musculus]                                                    | 32  |
| 919.1 | GI:58037145  | Snrpd2    | NP_081219.1    | <u>3</u> | <u>0.00</u> | <u>2</u> | <b>2</b> | <u>2</u> | <b>2</b> | small nuclear ribonucleoprotein Sm D2 [Mus musculus]                                                     | 14  |
| 920.1 | GI:218751908 | Ppp2r5c   | NP_001128473.1 | <u>3</u> | <u>0.00</u> | <u>3</u> | <b>3</b> | <u>3</u> | <b>3</b> | serine/threonine-protein phosphatase 2A 56 kDa regulatory subunit gamma isoform isoform d [Mus musculus] | 59  |
| 922.1 | GI:158634484 | Kcna3     | NP_032444.2    | <u>3</u> | <u>0.00</u> | <u>2</u> | <b>2</b> | <u>2</u> | <b>2</b> | potassium voltage-gated channel subfamily A member 3 [Mus musculus]                                      | 59  |
| 924.1 | GI:13385408  | Rpl11     | NP_080195.1    | <u>3</u> | <u>0.00</u> | <u>2</u> | <b>3</b> | <u>2</u> | <b>3</b> | 60S ribosomal protein L11 [Mus musculus]                                                                 | 20  |
| 926.1 | GI:126090932 | Nop56     | NP_077155.2    | <u>3</u> | <u>0.00</u> | <u>2</u> | <b>2</b> | <u>2</u> | <b>2</b> | nucleolar protein 56 [Mus musculus]                                                                      | 64  |
| 928.1 | GI:94409900  | LOC675521 | XP_978162.1    | <u>3</u> | <u>0.00</u> | <u>3</u> | <b>3</b> | <u>3</u> | <b>3</b> | PREDICTED: complement C4-B-like isoform 5 [Mus musculus]                                                 | 193 |
| 931.1 | GI:84875515  | Seh1l     | NP_001034177.1 | <u>3</u> | <u>0.00</u> | <u>1</u> | <b>1</b> | <u>1</u> | <b>1</b> | nucleoporin SEH1 isoform a [Mus musculus]                                                                | 40  |
| 933.1 | GI:83014391  | LOC637733 | XP_918585.1    | <u>3</u> | <u>0.00</u> | <u>3</u> | <b>3</b> | <u>3</u> | <b>3</b> | PREDICTED: high mobility group protein B1-like [Mus musculus]                                            | 25  |
| 940.1 | GI:6671664   | Canx      | NP_031623.1    | <u>3</u> | <u>0.00</u> | <u>2</u> | <b>2</b> | <u>2</u> | <b>2</b> | calnexin precursor [Mus musculus]                                                                        | 67  |
| 942.1 | GI:58036485  | Brsk2     | NP_001009930.1 | <u>3</u> | <u>0.00</u> | <u>3</u> | <b>3</b> | <u>3</u> | <b>3</b> | serine/threonine-protein kinase BRSK2 isoform                                                            | 80  |

|        |              |              |                |          |             |          |          |          |          |                                                                                                     |     |
|--------|--------------|--------------|----------------|----------|-------------|----------|----------|----------|----------|-----------------------------------------------------------------------------------------------------|-----|
|        |              |              |                |          |             |          |          |          |          | gamma [Mus musculus]                                                                                |     |
| 943.1  | GI:555943815 | Cacnb3       | NP_001273155.1 | <u>3</u> | <u>0.00</u> | <u>2</u> | <b>2</b> | <u>2</u> | <b>2</b> | voltage-dependent L-type calcium channel subunit beta-3 isoform 3 [Mus musculus]                    | 52  |
| 944.1  | GI:545688433 | Ptbp1        | NP_001269942.1 | <u>3</u> | <u>0.00</u> | <u>2</u> | <b>2</b> | <u>2</u> | <b>2</b> | polypyrimidine tract-binding protein 1 isoform 3 [Mus musculus]                                     | 53  |
| 945.1  | GI:545478409 | Naca         | NP_001269905.1 | <u>3</u> | <u>0.00</u> | <u>3</u> | <b>3</b> | <u>3</u> | <b>3</b> | nascent polypeptide-associated complex subunit alpha isoform b [Mus musculus]                       | 23  |
| 957.1  | GI:371940954 | Rap1gap      | NP_083839.1    | <u>3</u> | <u>0.00</u> | <u>2</u> | <b>2</b> | <u>2</u> | <b>2</b> | rap1 GTPase-activating protein 1 isoform 3 [Mus musculus]                                           | 73  |
| 961.1  | GI:31560210  | Fip1l1       | NP_077145.2    | <u>3</u> | <u>0.00</u> | <u>2</u> | <b>2</b> | <u>2</u> | <b>2</b> | pre-mRNA 3'-end-processing factor FIP1 isoform 2 [Mus musculus]                                     | 61  |
| 963.1  | GI:309263511 | LOC100504872 | XP_003086045.1 | <u>3</u> | <u>0.00</u> | <u>2</u> | <b>2</b> | <u>2</u> | <b>2</b> | PREDICTED: 60S ribosomal protein L32-like [Mus musculus]                                            | 16  |
| 964.1  | GI:295821212 | Sfxn3        | NP_001171484.1 | <u>3</u> | <u>0.00</u> | <u>2</u> | <b>2</b> | <u>2</u> | <b>2</b> | sideroflexin-3 isoform 3 [Mus musculus]                                                             | 31  |
| 977.1  | GI:170763483 | Ap3m2        | NP_001116292.1 | <u>3</u> | <u>0.00</u> | <u>2</u> | <b>2</b> | <u>2</u> | <b>2</b> | AP-3 complex subunit mu-2 [Mus musculus]                                                            | 47  |
| 978.1  | GI:170650632 | Sirt2        | NP_001116237.1 | <u>3</u> | <u>0.00</u> | <u>3</u> | <b>3</b> | <u>2</u> | <b>3</b> | NAD-dependent protein deacetylase sirtuin-2 isoform 2 [Mus musculus]                                | 40  |
| 982.1  | GI:150010574 | Scn2a1       | NP_001092768.1 | <u>3</u> | <u>0.00</u> | <u>1</u> | <b>1</b> | <u>1</u> | <b>1</b> | sodium channel, voltage-gated, type II, alpha 1 [Mus musculus]                                      | 228 |
| 986.1  | GI:9790219   | Dstn         | NP_062745.1    | <u>2</u> | <u>0.00</u> | <u>2</u> | <b>2</b> | <u>2</u> | <b>2</b> | destrin [Mus musculus]                                                                              | 19  |
| 990.1  | GI:9789997   | Letm1        | NP_062668.1    | <u>2</u> | <u>0.00</u> | <u>2</u> | <b>2</b> | <u>2</u> | <b>2</b> | LETM1 and EF-hand domain-containing protein 1, mitochondrial precursor [Mus musculus]               | 83  |
| 992.1  | GI:96975138  | Hprt         | NP_038584.2    | <u>2</u> | <u>0.00</u> | <u>2</u> | <b>2</b> | <u>2</u> | <b>2</b> | hypoxanthine-guanine phosphoribosyltransferase [Mus musculus]                                       | 25  |
| 993.1  | GI:9625037   | Rhog         | NP_062512.1    | <u>2</u> | <u>0.00</u> | <u>2</u> | <b>2</b> | <u>2</u> | <b>2</b> | rho-related GTP-binding protein RhoG precursor [Mus musculus]                                       | 21  |
| 1000.1 | GI:85861218  | Gmps         | NP_001028472.2 | <u>2</u> | <u>0.00</u> | <u>1</u> | <b>1</b> | <u>1</u> | <b>1</b> | GMP synthase [glutamine-hydrolyzing] [Mus musculus]                                                 | 77  |
| 1004.1 | GI:8393762   | Cpsf2        | NP_058552.1    | <u>2</u> | <u>0.00</u> | <u>1</u> | <b>1</b> | <u>1</u> | <b>1</b> | cleavage and polyadenylation specificity factor subunit 2 [Mus musculus]                            | 88  |
| 1013.1 | GI:71725385  | Diras2       | NP_001019645.1 | <u>2</u> | <u>0.00</u> | <u>2</u> | <b>2</b> | <u>2</u> | <b>2</b> | GTP-binding protein Di-Ras2 [Mus musculus]                                                          | 22  |
| 1016.1 | GI:70909347  | Pde10a       | NP_035996.2    | <u>2</u> | <u>0.00</u> | <u>1</u> | <b>1</b> | <u>1</u> | <b>1</b> | cAMP and cAMP-inhibited cGMP 3',5'-cyclic phosphodiesterase 10A [Mus musculus]                      | 90  |
| 1023.1 | GI:6755162   | Prkra        | NP_036001.1    | <u>2</u> | <u>0.00</u> | <u>1</u> | <b>1</b> | <u>1</u> | <b>1</b> | interferon-inducible double-stranded RNA-dependent protein kinase activator A [Mus musculus]        | 34  |
| 1027.1 | GI:6754382   | Cd47         | NP_034711.1    | <u>2</u> | <u>0.00</u> | <u>2</u> | <b>2</b> | <u>2</u> | <b>2</b> | leukocyte surface antigen CD47 precursor [Mus musculus]                                             | 35  |
| 1045.1 | GI:51093840  | Eif3l        | NP_660121.2    | <u>2</u> | <u>0.00</u> | <u>1</u> | <b>1</b> | <u>1</u> | <b>1</b> | eukaryotic translation initiation factor 3 subunit L [Mus musculus]                                 | 67  |
| 1051.1 | GI:38348466  | Igsf21       | NP_941012.1    | <u>2</u> | <u>0.00</u> | <u>2</u> | <b>2</b> | <u>2</u> | <b>2</b> | immunoglobulin superfamily member 21 precursor [Mus musculus]                                       | 52  |
| 1052.1 | GI:34996495  | Rpn2         | NP_062616.2    | <u>2</u> | <u>0.00</u> | <u>1</u> | <b>1</b> | <u>1</u> | <b>1</b> | dolichyl-diphosphooligosaccharide--protein glycosyltransferase subunit 2 precursor [Mus musculus]   | 69  |
| 1054.1 | GI:34538607  | ND4          | NP_904337.1    | <u>2</u> | <u>0.00</u> | <u>1</u> | <b>1</b> | <u>1</u> | <b>1</b> | NADH dehydrogenase subunit 4 (mitochondrion) [Mus musculus]                                         | 52  |
| 1082.1 | GI:27754144  | Ndufb5       | NP_079592.2    | <u>2</u> | <u>0.00</u> | <u>2</u> | <b>2</b> | <u>2</u> | <b>2</b> | NADH dehydrogenase [ubiquinone] 1 beta subcomplex subunit 5, mitochondrial precursor [Mus musculus] | 22  |
| 1097.1 | GI:254939640 | Vps16        | NP_085036.3    | <u>2</u> | <u>0.00</u> | <u>1</u> | <b>1</b> | <u>1</u> | <b>1</b> | vacuolar protein sorting-associated protein 16 homolog [Mus musculus]                               | 95  |
| 1103.1 | GI:254540068 | Krt18        | NP_034794.2    | <u>2</u> | <u>0.00</u> | <u>1</u> | <b>1</b> | <u>1</u> | <b>1</b> | keratin, type I cytoskeletal 18 [Mus musculus]                                                      | 48  |
| 1104.1 | GI:254540041 | Dynlrb1      | NP_080223.2    | <u>2</u> | <u>0.00</u> | <u>1</u> | <b>1</b> | <u>1</u> | <b>1</b> | dynein light chain roadblock-type 1 [Mus musculus]                                                  | 11  |



|        |              |              |                |          |             |          |          |          |          |                                                                                               |     |
|--------|--------------|--------------|----------------|----------|-------------|----------|----------|----------|----------|-----------------------------------------------------------------------------------------------|-----|
| 1107.1 | GI:254028189 | Snrpf        | NP_081522.1    | <u>2</u> | <u>0.00</u> | <u>1</u> | <b>1</b> | <u>1</u> | <b>1</b> | small nuclear ribonucleoprotein F [Mus musculus]                                              | 10  |
| 1110.1 | GI:23956166  | Luc7l3       | NP_080589.1    | <u>2</u> | <u>0.00</u> | <u>1</u> | <b>1</b> | <u>1</u> | <b>1</b> | luc7-like protein 3 [Mus musculus]                                                            | 58  |
| 1114.1 | GI:238231384 | Psmb6        | NP_032972.3    | <u>2</u> | <u>0.00</u> | <u>2</u> | <b>2</b> | <u>2</u> | <b>2</b> | proteasome subunit beta type-6 precursor [Mus musculus]                                       | 25  |
| 1122.1 | GI:226958643 | Pdk2         | NP_598428.2    | <u>2</u> | <u>0.00</u> | <u>1</u> | <b>1</b> | <u>1</u> | <b>1</b> | pyruvate dehydrogenase kinase, isoenzyme 2 [Mus musculus]                                     | 46  |
| 1126.1 | GI:224967126 | Grn          | NP_032201.2    | <u>2</u> | <u>0.00</u> | <u>1</u> | <b>1</b> | <u>1</u> | <b>1</b> | granulins precursor [Mus musculus]                                                            | 65  |
| 1127.1 | GI:224809382 | Arpc5        | NP_080645.2    | <u>2</u> | <u>0.00</u> | <u>1</u> | <b>1</b> | <u>1</u> | <b>1</b> | actin-related protein 2/3 complex subunit 5 [Mus musculus]                                    | 16  |
| 1137.1 | GI:21450053  | Fam49b       | NP_659095.1    | <u>2</u> | <u>0.00</u> | <u>1</u> | <b>1</b> | <u>1</u> | <b>1</b> | protein FAM49B [Mus musculus]                                                                 | 37  |
| 1141.1 | GI:21312950  | Ndufs7       | NP_083548.1    | <u>2</u> | <u>0.00</u> | <u>2</u> | <b>2</b> | <u>2</u> | <b>2</b> | NADH dehydrogenase [ubiquinone] iron-sulfur protein 7, mitochondrial precursor [Mus musculus] | 25  |
| 1145.1 | GI:21312044  | Eif3k        | NP_082935.1    | <u>2</u> | <u>0.00</u> | <u>2</u> | <b>2</b> | <u>2</u> | <b>2</b> | eukaryotic translation initiation factor 3 subunit K isoform 1 [Mus musculus]                 | 25  |
| 1149.1 | GI:19705424  | Psm3         | NP_033465.1    | <u>2</u> | <u>0.00</u> | <u>1</u> | <b>1</b> | <u>1</u> | <b>1</b> | 26S proteasome non-ATPase regulatory subunit 3 [Mus musculus]                                 | 61  |
| 1151.1 | GI:19526794  | Cd81         | NP_598416.1    | <u>2</u> | <u>0.00</u> | <u>2</u> | <b>2</b> | <u>2</u> | <b>2</b> | CD81 antigen [Mus musculus]                                                                   | 26  |
| 1163.1 | GI:165377226 | Slc2a1       | NP_035530.2    | <u>2</u> | <u>0.00</u> | <u>2</u> | <b>2</b> | <u>2</u> | <b>2</b> | solute carrier family 2, facilitated glucose transporter member 1 [Mus musculus]              | 54  |
| 1171.1 | GI:160415211 | Aqp4         | NP_033830.2    | <u>2</u> | <u>0.00</u> | <u>2</u> | <b>2</b> | <u>2</u> | <b>2</b> | aquaporin-4 [Mus musculus]                                                                    | 35  |
| 1174.1 | GI:159110562 | Icam5        | NP_032345.2    | <u>2</u> | <u>0.00</u> | <u>2</u> | <b>2</b> | <u>2</u> | <b>2</b> | intercellular adhesion molecule 5 precursor [Mus musculus]                                    | 97  |
| 1176.1 | GI:15808988  | Eif4h        | NP_291039.1    | <u>2</u> | <u>0.00</u> | <u>2</u> | <b>2</b> | <u>2</u> | <b>2</b> | eukaryotic translation initiation factor 4H [Mus musculus]                                    | 27  |
| 1183.1 | GI:149270460 | Gm3873       | XP_001478493.1 | <u>2</u> | <u>0.00</u> | <u>1</u> | <b>1</b> | <u>1</u> | <b>1</b> | PREDICTED: NADH dehydrogenase [ubiquinone] 1 beta subcomplex subunit 4-like [Mus musculus]    | 15  |
| 1186.1 | GI:139948800 | Map6d1       | NP_941001.2    | <u>2</u> | <u>0.00</u> | <u>2</u> | <b>2</b> | <u>1</u> | <b>2</b> | MAP6 domain-containing protein 1 [Mus musculus]                                               | 20  |
| 1192.1 | GI:13384756  | Eef1e1       | NP_079656.1    | <u>2</u> | <u>0.00</u> | <u>2</u> | <b>2</b> | <u>2</u> | <b>2</b> | eukaryotic translation elongation factor 1 epsilon-1 [Mus musculus]                           | 20  |
| 1193.1 | GI:13384676  | Dtd1         | NP_079590.1    | <u>2</u> | <u>0.00</u> | <u>2</u> | <b>2</b> | <u>2</u> | <b>2</b> | D-tyrosyl-tRNA(Tyr) deacylase 1 [Mus musculus]                                                | 23  |
| 1201.1 | GI:119360350 | Rgs7bp       | NP_084155.2    | <u>2</u> | <u>0.00</u> | <u>1</u> | <b>1</b> | <u>1</u> | <b>1</b> | regulator of G-protein signaling 7-binding protein [Mus musculus]                             | 29  |
| 1203.1 | GI:11528516  | Nrgn         | NP_071312.1    | <u>2</u> | <u>0.00</u> | <u>1</u> | <b>2</b> | <u>2</u> | <b>2</b> | neurogranin [Mus musculus]                                                                    | 7   |
| 1204.1 | GI:114158691 | Cops8        | NP_598566.3    | <u>2</u> | <u>0.00</u> | <u>1</u> | <b>1</b> | <u>1</u> | <b>1</b> | COP9 signalosome complex subunit 8 [Mus musculus]                                             | 23  |
| 1206.1 | GI:11230778  | Tmod1        | NP_068683.1    | <u>2</u> | <u>0.00</u> | <u>2</u> | <b>2</b> | <u>2</u> | <b>2</b> | tropomodulin-1 [Mus musculus]                                                                 | 40  |
| 1208.1 | GI:110625975 | Pdk1         | NP_766253.2    | <u>2</u> | <u>0.00</u> | <u>1</u> | <b>1</b> | <u>1</u> | <b>1</b> | pyruvate dehydrogenase kinase, isozyme 1 precursor [Mus musculus]                             | 49  |
| 1209.1 | GI:10946620  | Cend1        | NP_067291.1    | <u>2</u> | <u>0.00</u> | <u>2</u> | <b>2</b> | <u>2</u> | <b>2</b> | cell cycle exit and neuronal differentiation protein 1 [Mus musculus]                         | 15  |
| 1216.1 | GI:394582113 | Mical3       | NP_001257404.1 | <u>2</u> | <u>0.00</u> | <u>1</u> | <b>1</b> | <u>1</u> | <b>1</b> | protein-methionine sulfoxide oxidase MICAL3 isoform 1 [Mus musculus]                          | 224 |
| 1217.1 | GI:377836695 | LOC100862036 | XP_003689114.1 | <u>2</u> | <u>0.00</u> | <u>1</u> | <b>1</b> | <u>1</u> | <b>1</b> | PREDICTED: uncharacterized protein LOC100862036 [Mus musculus]                                | 48  |
| 1219.1 | GI:23956194  | Arl8a        | NP_081099.1    | <u>2</u> | <u>0.00</u> | <u>1</u> | <b>1</b> | <u>1</u> | <b>1</b> | ADP-ribosylation factor-like protein 8A [Mus musculus]                                        | 21  |
| 1237.1 | GI:84579919  | Gng7         | NP_034449.2    | <u>2</u> | <u>0.00</u> | <u>2</u> | <b>2</b> | <u>2</u> | <b>2</b> | guanine nucleotide-binding protein G(I)/G(S)/G(O) subunit gamma-7 [Mus musculus]              | 8   |

|        |              |          |                |          |             |          |          |          |          |                                                                                               |     |
|--------|--------------|----------|----------------|----------|-------------|----------|----------|----------|----------|-----------------------------------------------------------------------------------------------|-----|
| 1248.1 | GI:6679225   | Pcp2     | NP_032816.1    | <u>2</u> | <u>0.00</u> | <u>1</u> | <b>1</b> | <u>1</u> | <b>1</b> | Purkinje cell protein 2 isoform 3 [Mus musculus]                                              | 11  |
| 1249.1 | GI:6678549   | Vamp1    | NP_033522.1    | <u>2</u> | <u>0.00</u> | <u>1</u> | <b>2</b> | <u>2</u> | <b>2</b> | vesicle-associated membrane protein 1 isoform a [Mus musculus]                                | 13  |
| 1252.1 | GI:55742885  | Rpl34    | NP_081000.1    | <u>2</u> | <u>0.00</u> | <u>2</u> | <b>2</b> | <u>2</u> | <b>2</b> | 60S ribosomal protein L34 isoform 1 [Mus musculus]                                            | 13  |
| 1258.1 | GI:39204553  | Chd4     | NP_666091.1    | <u>2</u> | <u>0.00</u> | <u>1</u> | <b>1</b> | <u>1</u> | <b>1</b> | chromodomain-helicase-DNA-binding protein 4 [Mus musculus]                                    | 218 |
| 1262.1 | GI:31560754  | Slc25a25 | NP_666230.2    | <u>2</u> | <u>0.00</u> | <u>1</u> | <b>1</b> | <u>1</u> | <b>1</b> | calcium-binding mitochondrial carrier protein SCaMC-2 isoform 1 [Mus musculus]                | 57  |
| 1265.1 | GI:311893378 | Dync1i2  | NP_001185803.1 | <u>2</u> | <u>0.00</u> | <u>2</u> | <b>2</b> | <u>2</u> | <b>2</b> | cytoplasmic dynein 1 intermediate chain 2 isoform 3 [Mus musculus]                            | 71  |
| 1268.1 | GI:294997317 | Sirpa    | NP_001171118.1 | <u>2</u> | <u>0.00</u> | <u>1</u> | <b>1</b> | <u>1</u> | <b>1</b> | tyrosine-protein phosphatase non-receptor type substrate 1 isoform 2 precursor [Mus musculus] | 32  |
| 1287.1 | GI:19527246  | Tubg2    | NP_598789.1    | <u>2</u> | <u>0.00</u> | <u>2</u> | <b>2</b> | <u>2</u> | <b>2</b> | tubulin gamma-2 chain [Mus musculus]                                                          | 51  |
| 1291.1 | GI:158186674 | Srrt     | NP_001103380.1 | <u>2</u> | <u>0.00</u> | <u>2</u> | <b>2</b> | <u>2</u> | <b>2</b> | serrate RNA effector molecule homolog isoform 3 [Mus musculus]                                | 99  |
| 1295.1 | GI:14149645  | Mecp2    | NP_034918.1    | <u>2</u> | <u>0.00</u> | <u>1</u> | <b>1</b> | <u>1</u> | <b>1</b> | methyl-CpG-binding protein 2 isoform 2 [Mus musculus]                                         | 52  |
| 1301.1 | GI:9789991   | Hsd17b12 | NP_062631.1    | <u>1</u> | <u>0.00</u> | <u>1</u> | <b>1</b> | <u>1</u> | <b>1</b> | estradiol 17-beta-dehydrogenase 12 [Mus musculus]                                             | 35  |
| 1302.1 | GI:9506911   | Ndufa1   | NP_062316.1    | <u>1</u> | <u>0.00</u> | <u>1</u> | <b>1</b> | <u>1</u> | <b>1</b> | NADH dehydrogenase [ubiquinone] 1 alpha subcomplex subunit 1 [Mus musculus]                   | 8   |
| 1305.1 | GI:88900515  | C2ed2l   | NP_082185.2    | <u>1</u> | <u>0.00</u> | <u>1</u> | <b>1</b> | <u>1</u> | <b>1</b> | C2 domain-containing protein 2-like [Mus musculus]                                            | 76  |
| 1309.1 | GI:84781781  | Pdap1    | NP_001028485.1 | <u>1</u> | <u>0.00</u> | <u>1</u> | <b>1</b> | <u>1</u> | <b>1</b> | 28 kDa heat- and acid-stable phosphoprotein [Mus musculus]                                    | 21  |
| 1310.1 | GI:84662761  | Tspan7   | NP_062608.2    | <u>1</u> | <u>0.00</u> | <u>1</u> | <b>1</b> | <u>1</u> | <b>1</b> | tetraspanin-7 [Mus musculus]                                                                  | 28  |
| 1314.1 | GI:83627717  | Eif4e    | NP_031943.3    | <u>1</u> | <u>0.00</u> | <u>1</u> | <b>1</b> | <u>1</u> | <b>1</b> | eukaryotic translation initiation factor 4E [Mus musculus]                                    | 25  |
| 1317.1 | GI:7710086   | Rab10    | NP_057885.1    | <u>1</u> | <u>0.00</u> | <u>1</u> | <b>1</b> | <u>1</u> | <b>1</b> | ras-related protein Rab-10 [Mus musculus]                                                     | 23  |
| 1325.1 | GI:7106389   | Psm7     | NP_036099.1    | <u>1</u> | <u>0.00</u> | <u>1</u> | <b>1</b> | <u>1</u> | <b>1</b> | proteasome subunit alpha type-7 [Mus musculus]                                                | 28  |
| 1330.1 | GI:6755448   | Sec22b   | NP_035472.1    | <u>1</u> | <u>0.00</u> | <u>1</u> | <b>1</b> | <u>1</u> | <b>1</b> | vesicle-trafficking protein SEC22b precursor [Mus musculus]                                   | 25  |
| 1334.1 | GI:6755210   | Psm13    | NP_036005.1    | <u>1</u> | <u>0.00</u> | <u>1</u> | <b>1</b> | <u>1</u> | <b>1</b> | 26S proteasome non-ATPase regulatory subunit 13 [Mus musculus]                                | 43  |
| 1338.1 | GI:6754022   | Gng3     | NP_034446.1    | <u>1</u> | <u>0.00</u> | <u>1</u> | <b>2</b> | <u>1</u> | <b>2</b> | guanine nucleotide-binding protein G(I)/G(S)/G(O) subunit gamma-3 precursor [Mus musculus]    | 8   |
| 1341.1 | GI:6753530   | Cryab    | NP_034094.1    | <u>1</u> | <u>0.00</u> | <u>1</u> | <b>1</b> | <u>1</u> | <b>1</b> | alpha-crystallin B chain [Mus musculus]                                                       | 20  |
| 1345.1 | GI:6679961   | Mtpn     | NP_032124.1    | <u>1</u> | <u>0.00</u> | <u>1</u> | <b>1</b> | <u>1</u> | <b>1</b> | myotrophin [Mus musculus]                                                                     | 13  |
| 1348.1 | GI:6679803   | Fkbp1a   | NP_032045.1    | <u>1</u> | <u>0.00</u> | <u>1</u> | <b>1</b> | <u>1</u> | <b>1</b> | peptidyl-prolyl cis-trans isomerase FKBP1A [Mus musculus]                                     | 12  |
| 1351.1 | GI:6679587   | Rab1     | NP_033022.1    | <u>1</u> | <u>0.00</u> | <u>1</u> | <b>1</b> | <u>1</u> | <b>1</b> | ras-related protein Rab-1A [Mus musculus]                                                     | 23  |
| 1356.1 | GI:6679066   | Nipsnap1 | NP_032724.1    | <u>1</u> | <u>0.00</u> | <u>1</u> | <b>1</b> | <u>1</u> | <b>1</b> | protein NipSnap homolog 1 [Mus musculus]                                                      | 33  |
| 1357.1 | GI:6678437   | Tpt1     | NP_033455.1    | <u>1</u> | <u>0.00</u> | <u>1</u> | <b>1</b> | <u>1</u> | <b>1</b> | translationally-controlled tumor protein [Mus musculus]                                       | 19  |
| 1358.1 | GI:6678359   | Tkt      | NP_033414.1    | <u>1</u> | <u>0.00</u> | <u>1</u> | <b>1</b> | <u>1</u> | <b>1</b> | transketolase [Mus musculus]                                                                  | 68  |
| 1359.1 | GI:6677995   | Slc16a1  | NP_033222.1    | <u>1</u> | <u>0.00</u> | <u>1</u> | <b>1</b> | <u>1</u> | <b>1</b> | monocarboxylate transporter 1 [Mus musculus]                                                  | 53  |
| 1365.1 | GI:62000629  | Cnrip1   | NP_084137.1    | <u>1</u> | <u>0.00</u> | <u>1</u> | <b>1</b> | <u>1</u> | <b>1</b> | CB1 cannabinoid receptor-interacting protein 1 [Mus musculus]                                 | 19  |
| 1367.1 | GI:60218877  | Abcd3    | NP_033017.2    | <u>1</u> | <u>0.00</u> | <u>1</u> | <b>1</b> | <u>1</u> | <b>1</b> | ATP-binding cassette sub-family D member 3                                                    | 75  |

|        |              |         |             |          |             |          |          |          |          |                                                                                  |     |
|--------|--------------|---------|-------------|----------|-------------|----------|----------|----------|----------|----------------------------------------------------------------------------------|-----|
|        |              |         |             |          |             |          |          |          |          | [Mus musculus]                                                                   |     |
| 1374.1 | GI:58037257  | Dcaf7   | NP_082222.1 | <u>1</u> | <u>0.00</u> | <u>1</u> | <b>1</b> | <u>1</u> | <b>1</b> | DDB1- and CUL4-associated factor 7 [Mus musculus]                                | 39  |
| 1378.1 | GI:56790921  | Hepacam | NP_780398.2 | <u>1</u> | <u>0.00</u> | <u>1</u> | <b>1</b> | <u>1</u> | <b>1</b> | hepatocyte cell adhesion molecule precursor [Mus musculus]                       | 46  |
| 1384.1 | GI:46195809  | Pptc7   | NP_796216.2 | <u>1</u> | <u>0.00</u> | <u>1</u> | <b>1</b> | <u>1</u> | <b>1</b> | protein phosphatase PTC7 homolog [Mus musculus]                                  | 33  |
| 1385.1 | GI:45544618  | Mtap    | NP_077753.1 | <u>1</u> | <u>0.00</u> | <u>1</u> | <b>1</b> | <u>1</u> | <b>1</b> | S-methyl-5'-thioadenosine phosphorylase [Mus musculus]                           | 31  |
| 1389.1 | GI:38490690  | Iars2   | NP_941055.1 | <u>1</u> | <u>0.00</u> | <u>1</u> | <b>1</b> | <u>1</u> | <b>1</b> | isoleucine--tRNA ligase, mitochondrial precursor [Mus musculus]                  | 113 |
| 1396.1 | GI:357527369 | Prmt8   | NP_958759.2 | <u>1</u> | <u>0.00</u> | <u>1</u> | <b>1</b> | <u>1</u> | <b>1</b> | protein arginine N-methyltransferase 8 [Mus musculus]                            | 45  |
| 1398.1 | GI:34610207  | Aars    | NP_666329.2 | <u>1</u> | <u>0.00</u> | <u>1</u> | <b>1</b> | <u>1</u> | <b>1</b> | alanine--tRNA ligase, cytoplasmic [Mus musculus]                                 | 107 |
| 1401.1 | GI:34538605  | ND3     | NP_904335.1 | <u>1</u> | <u>0.00</u> | <u>1</u> | <b>1</b> | <u>1</u> | <b>1</b> | NADH dehydrogenase subunit 3 (mitochondrion) [Mus musculus]                      | 13  |
| 1407.1 | GI:33859604  | Psmc2   | NP_035318.1 | <u>1</u> | <u>0.00</u> | <u>1</u> | <b>1</b> | <u>1</u> | <b>1</b> | 26S protease regulatory subunit 7 [Mus musculus]                                 | 53  |
| 1412.1 | GI:31982847  | Gad1    | NP_032103.2 | <u>1</u> | <u>0.00</u> | <u>1</u> | <b>1</b> | <u>1</u> | <b>1</b> | glutamate decarboxylase 1 [Mus musculus]                                         | 67  |
| 1413.1 | GI:31982724  | Mybbp1a | NP_058056.2 | <u>1</u> | <u>0.00</u> | <u>1</u> | <b>1</b> | <u>1</u> | <b>1</b> | myb-binding protein 1A [Mus musculus]                                            | 152 |
| 1415.1 | GI:31981600  | Ndufa2  | NP_035015.2 | <u>1</u> | <u>0.00</u> | <u>1</u> | <b>1</b> | <u>1</u> | <b>1</b> | NADH dehydrogenase [ubiquinone] 1 alpha subcomplex subunit 2 [Mus musculus]      | 11  |
| 1420.1 | GI:31560433  | Snx3    | NP_059500.2 | <u>1</u> | <u>0.00</u> | <u>1</u> | <b>1</b> | <u>1</u> | <b>1</b> | sorting nexin-3 [Mus musculus]                                                   | 19  |
| 1436.1 | GI:29336059  | Polr2c  | NP_033116.2 | <u>1</u> | <u>0.00</u> | <u>1</u> | <b>1</b> | <u>1</u> | <b>1</b> | DNA-directed RNA polymerase II subunit RPB3 [Mus musculus]                       | 31  |
| 1439.1 | GI:28626508  | Rheb    | NP_444305.2 | <u>1</u> | <u>0.00</u> | <u>1</u> | <b>1</b> | <u>1</u> | <b>1</b> | GTP-binding protein Rheb precursor [Mus musculus]                                | 20  |
| 1443.1 | GI:27923929  | Hpcal4  | NP_778163.1 | <u>1</u> | <u>0.00</u> | <u>1</u> | <b>1</b> | <u>1</u> | <b>1</b> | hippocalcin-like protein 4 [Mus musculus]                                        | 22  |
| 1450.1 | GI:27369842  | Srek1   | NP_766180.1 | <u>1</u> | <u>0.00</u> | <u>1</u> | <b>1</b> | <u>1</u> | <b>1</b> | splicing regulatory glutamine/lysine-rich protein 1 [Mus musculus]               | 57  |
| 1453.1 | GI:27228982  | Mrps23  | NP_077136.2 | <u>1</u> | <u>0.00</u> | <u>1</u> | <b>1</b> | <u>1</u> | <b>1</b> | 28S ribosomal protein S23, mitochondrial [Mus musculus]                          | 20  |
| 1454.1 | GI:261878543 | Mthfd1  | NP_620084.2 | <u>1</u> | <u>0.00</u> | <u>1</u> | <b>1</b> | <u>1</u> | <b>1</b> | C-1-tetrahydrofolate synthase, cytoplasmic [Mus musculus]                        | 101 |
| 1455.1 | GI:261862282 | Slc2a3  | NP_035531.3 | <u>1</u> | <u>0.00</u> | <u>1</u> | <b>1</b> | <u>1</u> | <b>1</b> | solute carrier family 2, facilitated glucose transporter member 3 [Mus musculus] | 53  |
| 1478.1 | GI:23346437  | Sf3b4   | NP_694693.1 | <u>1</u> | <u>0.00</u> | <u>1</u> | <b>1</b> | <u>1</u> | <b>1</b> | splicing factor 3B subunit 4 [Mus musculus]                                      | 44  |
| 1481.1 | GI:229092636 | Cacng3  | NP_062303.2 | <u>1</u> | <u>0.00</u> | <u>1</u> | <b>1</b> | <u>1</u> | <b>1</b> | voltage-dependent calcium channel gamma-3 subunit [Mus musculus]                 | 35  |
| 1482.1 | GI:227330602 | Necab1  | NP_848732.3 | <u>1</u> | <u>0.00</u> | <u>1</u> | <b>1</b> | <u>1</u> | <b>1</b> | N-terminal EF-hand calcium-binding protein 1 [Mus musculus]                      | 41  |
| 1495.1 | GI:22203763  | Cpe     | NP_038522.2 | <u>1</u> | <u>0.00</u> | <u>1</u> | <b>1</b> | <u>1</u> | <b>1</b> | carboxypeptidase E precursor [Mus musculus]                                      | 53  |
| 1497.1 | GI:21704042  | Cstf3   | NP_663504.1 | <u>1</u> | <u>0.00</u> | <u>1</u> | <b>1</b> | <u>1</u> | <b>1</b> | cleavage stimulation factor subunit 3 isoform 1 [Mus musculus]                   | 83  |
| 1500.1 | GI:21644575  | Lgi3    | NP_660254.1 | <u>1</u> | <u>0.00</u> | <u>1</u> | <b>1</b> | <u>1</u> | <b>1</b> | leucine-rich repeat LGI family member 3 precursor [Mus musculus]                 | 62  |
| 1502.1 | GI:21426847  | Pea15a  | NP_035193.1 | <u>1</u> | <u>0.00</u> | <u>1</u> | <b>1</b> | <u>1</u> | <b>1</b> | astrocytic phosphoprotein PEA-15 isoform 2 [Mus musculus]                        | 15  |
| 1505.1 | GI:21312988  | Mzt2    | NP_083630.1 | <u>1</u> | <u>0.00</u> | <u>1</u> | <b>1</b> | <u>1</u> | <b>1</b> | mitotic-spindle organizing protein 2 [Mus musculus]                              | 17  |
| 1509.1 | GI:21312153  | Glrx5   | NP_082695.1 | <u>1</u> | <u>0.00</u> | <u>1</u> | <b>1</b> | <u>1</u> | <b>1</b> | glutaredoxin-related protein 5, mitochondrial [Mus musculus]                     | 16  |
| 1512.1 | GI:20982833  | Spats2  | NP_631879.1 | <u>1</u> | <u>0.00</u> | <u>1</u> | <b>1</b> | <u>1</u> | <b>1</b> | spermatogenesis-associated serine-rich protein 2 [Mus musculus]                  | 59  |

|        |              |           |                |          |             |          |          |          |          |                                                                         |     |
|--------|--------------|-----------|----------------|----------|-------------|----------|----------|----------|----------|-------------------------------------------------------------------------|-----|
| 1513.1 | GI:20149726  | Cds2      | NP_619592.1    | <u>1</u> | <u>0.00</u> | <u>1</u> | <u>1</u> | <u>1</u> | <u>1</u> | phosphatidate cytidyltransferase 2 [Mus musculus]                       | 51  |
| 1514.1 | GI:19527228  | Cisd1     | NP_598768.1    | <u>1</u> | <u>0.00</u> | <u>1</u> | <u>1</u> | <u>1</u> | <u>1</u> | CDGSH iron-sulfur domain-containing protein 1 [Mus musculus]            | 12  |
| 1522.1 | GI:18875410  | Mlc1      | NP_573504.1    | <u>1</u> | <u>0.00</u> | <u>1</u> | <u>1</u> | <u>1</u> | <u>1</u> | membrane protein MLC1 [Mus musculus]                                    | 42  |
| 1535.1 | GI:169790909 | Mrps9     | NP_076003.3    | <u>1</u> | <u>0.00</u> | <u>1</u> | <u>1</u> | <u>1</u> | <u>1</u> | 28S ribosomal protein S9, mitochondrial precursor [Mus musculus]        | 45  |
| 1536.1 | GI:16716569  | Prss1     | NP_444473.1    | <u>1</u> | <u>0.00</u> | <u>1</u> | <u>1</u> | <u>1</u> | <u>1</u> | protease, serine, 1 precursor [Mus musculus]                            | 26  |
| 1539.1 | GI:166851828 | Atp5d     | NP_079589.2    | <u>1</u> | <u>0.00</u> | <u>1</u> | <u>1</u> | <u>1</u> | <u>1</u> | ATP synthase subunit delta, mitochondrial precursor [Mus musculus]      | 18  |
| 1543.1 | GI:161016826 | Reep5     | NP_031900.3    | <u>1</u> | <u>0.00</u> | <u>1</u> | <u>1</u> | <u>1</u> | <u>1</u> | receptor expression-enhancing protein 5 [Mus musculus]                  | 21  |
| 1547.1 | GI:160333789 | Spr       | NP_035597.2    | <u>1</u> | <u>0.00</u> | <u>1</u> | <u>1</u> | <u>1</u> | <u>1</u> | sepiapterin reductase [Mus musculus]                                    | 28  |
| 1553.1 | GI:15617197  | Atp6v1g1  | NP_077135.1    | <u>1</u> | <u>0.00</u> | <u>1</u> | <u>1</u> | <u>1</u> | <u>1</u> | V-type proton ATPase subunit G 1 [Mus musculus]                         | 14  |
| 1558.1 | GI:148368976 | Adap1     | NP_766311.2    | <u>1</u> | <u>0.00</u> | <u>1</u> | <u>1</u> | <u>1</u> | <u>1</u> | centaurin, alpha 1 [Mus musculus]                                       | 43  |
| 1564.1 | GI:14149750  | Arl6ip5   | NP_075368.1    | <u>1</u> | <u>0.00</u> | <u>1</u> | <u>1</u> | <u>1</u> | <u>1</u> | PRA1 family protein 3 [Mus musculus]                                    | 22  |
| 1565.1 | GI:134949024 | Pak7      | NP_766446.2    | <u>1</u> | <u>0.00</u> | <u>1</u> | <u>1</u> | <u>1</u> | <u>1</u> | serine/threonine-protein kinase PAK 7 [Mus musculus]                    | 81  |
| 1572.1 | GI:13385998  | Trap1     | NP_080784.1    | <u>1</u> | <u>0.00</u> | <u>1</u> | <u>2</u> | <u>1</u> | <u>2</u> | heat shock protein 75 kDa, mitochondrial precursor [Mus musculus]       | 80  |
| 1574.1 | GI:13385968  | Tppp3     | NP_080757.1    | <u>1</u> | <u>0.00</u> | <u>1</u> | <u>1</u> | <u>1</u> | <u>1</u> | tubulin polymerization-promoting protein family member 3 [Mus musculus] | 19  |
| 1575.1 | GI:13385800  | Tceb2     | NP_080581.1    | <u>1</u> | <u>0.00</u> | <u>1</u> | <u>1</u> | <u>1</u> | <u>1</u> | transcription elongation factor B polypeptide 2 [Mus musculus]          | 13  |
| 1578.1 | GI:13385598  | Snrpd3    | NP_080371.1    | <u>1</u> | <u>0.00</u> | <u>1</u> | <u>1</u> | <u>1</u> | <u>1</u> | small nuclear ribonucleoprotein Sm D3 [Mus musculus]                    | 14  |
| 1589.1 | GI:12963653  | Pin1      | NP_075860.1    | <u>1</u> | <u>0.00</u> | <u>1</u> | <u>1</u> | <u>1</u> | <u>1</u> | peptidyl-prolyl cis-trans isomerase NIMA-interacting 1 [Mus musculus]   | 18  |
| 1608.1 | GI:124248577 | Psmc4     | NP_036004.2    | <u>1</u> | <u>0.00</u> | <u>1</u> | <u>1</u> | <u>1</u> | <u>1</u> | 26S protease regulatory subunit 6B [Mus musculus]                       | 47  |
| 1615.1 | GI:118403322 | Acad8     | NP_080138.2    | <u>1</u> | <u>0.00</u> | <u>1</u> | <u>1</u> | <u>1</u> | <u>1</u> | isobutyryl-CoA dehydrogenase, mitochondrial precursor [Mus musculus]    | 45  |
| 1621.1 | GI:114796637 | Arhgap23  | NP_067468.2    | <u>1</u> | <u>0.00</u> | <u>1</u> | <u>1</u> | <u>1</u> | <u>1</u> | rho GTPase-activating protein 23 [Mus musculus]                         | 139 |
| 1622.1 | GI:114687888 | Cdh11     | NP_033996.4    | <u>1</u> | <u>0.00</u> | <u>1</u> | <u>1</u> | <u>1</u> | <u>1</u> | cadherin-11 preproprotein [Mus musculus]                                | 88  |
| 1625.1 | GI:111154063 | Ssrp1     | NP_892035.2    | <u>1</u> | <u>0.00</u> | <u>1</u> | <u>1</u> | <u>1</u> | <u>1</u> | FACT complex subunit SSRP1 [Mus musculus]                               | 81  |
| 1637.1 | GI:94363330  | Gm8210    | XP_990228.1    | <u>1</u> | <u>0.00</u> | <u>1</u> | <u>1</u> | <u>1</u> | <u>1</u> | PREDICTED: 60S ribosomal protein L29-like [Mus musculus]                | 18  |
| 1648.1 | GI:82916992  | LOC631033 | XP_909898.1    | <u>1</u> | <u>0.00</u> | <u>1</u> | <u>1</u> | <u>1</u> | <u>1</u> | PREDICTED: lysine--tRNA ligase-like isoform 1 [Mus musculus]            | 68  |
| 1651.1 | GI:7305307   | Ndrp3     | NP_038893.1    | <u>1</u> | <u>0.00</u> | <u>1</u> | <u>1</u> | <u>1</u> | <u>1</u> | protein NDRG3 isoform 2 [Mus musculus]                                  | 42  |
| 1652.1 | GI:7304969   | Cnbp      | NP_038521.1    | <u>1</u> | <u>0.00</u> | <u>1</u> | <u>1</u> | <u>1</u> | <u>1</u> | cellular nucleic acid-binding protein isoform 1 [Mus musculus]          | 20  |
| 1663.1 | GI:6754920   | Ncam2     | NP_035084.1    | <u>1</u> | <u>0.00</u> | <u>1</u> | <u>1</u> | <u>1</u> | <u>1</u> | neural cell adhesion molecule 2 isoform b precursor [Mus musculus]      | 81  |
| 1673.1 | GI:6678315   | Tsc22d1   | NP_033392.1    | <u>1</u> | <u>0.00</u> | <u>1</u> | <u>1</u> | <u>1</u> | <u>1</u> | TSC22 domain family protein 1 isoform 2 [Mus musculus]                  | 16  |
| 1675.1 | GI:62243852  | Sltm      | NP_080613.1    | <u>1</u> | <u>0.00</u> | <u>1</u> | <u>1</u> | <u>1</u> | <u>1</u> | SAFB-like transcription modulator isoform b [Mus musculus]              | 115 |
| 1676.1 | GI:61656178  | Pfdn4     | NP_001013387.1 | <u>1</u> | <u>0.00</u> | <u>1</u> | <u>1</u> | <u>1</u> | <u>1</u> | prefoldin 4 isoform 2 [Mus musculus]                                    | 9   |

|        |              |              |                |                       |             |            |            |            |            |                                                                                            |     |
|--------|--------------|--------------|----------------|-----------------------|-------------|------------|------------|------------|------------|--------------------------------------------------------------------------------------------|-----|
| 1679.1 | GI:553726987 | Gng2         | NP_001272837.1 | <u>1</u>              | <u>0.00</u> | <u>1</u>   | <b>2</b>   | <u>1</u>   | <b>2</b>   | guanine nucleotide-binding protein G(I)/G(S)/G(O) subunit gamma-2 precursor [Mus musculus] | 8   |
| 1683.1 | GI:47271504  | App          | NP_031497.2    | <u>1</u>              | <u>0.00</u> | <u>1</u>   | <b>1</b>   | <u>1</u>   | <b>1</b>   | amyloid beta A4 protein isoform 2 precursor [Mus musculus]                                 | 78  |
| 1692.1 | GI:407262829 | Gm15453      | XP_003945671.1 | <u>1</u>              | <u>0.00</u> | <u>1</u>   | <b>1</b>   | <u>1</u>   | <b>1</b>   | PREDICTED: putative RNA-binding protein 3-like [Mus musculus]                              | 17  |
| 1693.1 | GI:407262230 | LOC101055659 | XP_003946032.1 | <u>1</u>              | <u>0.00</u> | <u>1</u>   | <b>1</b>   | <u>1</u>   | <b>1</b>   | PREDICTED: mitochondrial import receptor subunit TOM22 homolog [Mus musculus]              | 14  |
| 1697.1 | GI:37577140  | Fxyd1        | NP_443718.1    | <u>1</u>              | <u>0.00</u> | <u>1</u>   | <b>1</b>   | <u>1</u>   | <b>1</b>   | phospholemman isoform b precursor [Mus musculus]                                           | 10  |
| 1709.1 | GI:31543047  | Kpna1        | NP_032491.2    | <u>1</u>              | <u>0.00</u> | <u>1</u>   | <b>1</b>   | <u>1</u>   | <b>1</b>   | importin subunit alpha-5 [Mus musculus]                                                    | 60  |
| 1715.1 | GI:300388150 | Dync1i1      | NP_001177955.1 | <u>1</u>              | <u>0.00</u> | <u>1</u>   | <b>1</b>   | <u>1</u>   | <b>1</b>   | cytoplasmic dynein 1 intermediate chain 1 isoform 3 [Mus musculus]                         | 70  |
| 1717.1 | GI:295424139 | Gps1         | NP_001171345.1 | <u>1</u>              | <u>0.00</u> | <u>1</u>   | <b>1</b>   | <u>1</u>   | <b>1</b>   | COP9 signalosome complex subunit 1 isoform 2 [Mus musculus]                                | 55  |
| 1722.1 | GI:269954700 | Sec24c       | NP_001161745.1 | <u>1</u>              | <u>0.00</u> | <u>1</u>   | <b>1</b>   | <u>1</u>   | <b>1</b>   | Sec24 related gene family, member C isoform 2 [Mus musculus]                               | 112 |
| 1726.1 | GI:26024336  | Rps27        | NP_081291.1    | <u>1</u>              | <u>0.00</u> | <u>1</u>   | <b>1</b>   | <u>1</u>   | <b>1</b>   | 40S ribosomal protein S27 [Mus musculus]                                                   | 9   |
| 1730.1 | GI:255982530 | Rpa1         | NP_001157695.1 | <u>1</u>              | <u>0.00</u> | <u>1</u>   | <b>1</b>   | <u>1</u>   | <b>1</b>   | replication protein A 70 kDa DNA-binding subunit isoform 1 [Mus musculus]                  | 71  |
| 1739.1 | GI:239937491 | Trim32       | NP_001155254.1 | <u>1</u>              | <u>0.00</u> | <u>1</u>   | <b>1</b>   | <u>1</u>   | <b>1</b>   | E3 ubiquitin-protein ligase TRIM32 [Mus musculus]                                          | 72  |
| 1745.1 | GI:225543424 | Arhgap1      | NP_001139374.1 | <u>1</u>              | <u>0.00</u> | <u>1</u>   | <b>1</b>   | <u>1</u>   | <b>1</b>   | rho GTPase-activating protein 1 isoform 1 [Mus musculus]                                   | 54  |
| 1747.1 | GI:20544149  | Csnk1d       | NP_620690.1    | <u>1</u>              | <u>0.00</u> | <u>1</u>   | <b>1</b>   | <u>1</u>   | <b>1</b>   | casein kinase I isoform delta isoform 1 [Mus musculus]                                     | 47  |
| 1758.1 | GI:148596982 | Grsf1        | NP_001091946.1 | <u>1</u>              | <u>0.00</u> | <u>1</u>   | <b>1</b>   | <u>1</u>   | <b>1</b>   | G-rich sequence factor 1 isoform 2 [Mus musculus]                                          | 42  |
| 4.1    | GI:134288917 | Dync1h1      | NP_084514.2    | <u>88</u>             | <u>0.03</u> | <u>56</u>  | <b>58</b>  | <u>55</u>  | <b>57</b>  | cytoplasmic dynein 1 heavy chain 1 [Mus musculus]                                          | 532 |
| 2.1    | GI:295054266 | Sptan1       | NP_001171138.1 | <u>14</u><br><u>3</u> | <u>0.03</u> | <u>122</u> | <b>155</b> | <u>116</u> | <b>152</b> | spectrin alpha chain, non-erythrocytic 1 isoform 2 [Mus musculus]                          | 285 |
| 5.1    | GI:33598964  | Myh10        | NP_780469.1    | <u>85</u>             | <u>0.03</u> | <u>72</u>  | <b>87</b>  | <u>70</u>  | <b>85</b>  | myosin-10 [Mus musculus]                                                                   | 229 |
| 2.2    | GI:115496850 | Sptan1       | NP_001070022.1 | <u>14</u><br><u>3</u> | <u>0.04</u> | <u>121</u> | <b>154</b> | <u>114</u> | <b>150</b> | spectrin alpha chain, non-erythrocytic 1 isoform 1 [Mus musculus]                          | 285 |
| 35.3   | GI:8394493   | Tuba8        | NP_059075.1    | <u>18</u>             | <u>0.04</u> | <u>14</u>  | <b>37</b>  | <u>17</u>  | <b>36</b>  | tubulin alpha-8 chain [Mus musculus]                                                       | 50  |
| 3.7    | GI:11230802  | Actn4        | NP_068695.1    | <u>33</u>             | <u>0.04</u> | <u>27</u>  | <b>33</b>  | <u>26</u>  | <b>32</b>  | alpha-actinin-4 [Mus musculus]                                                             | 105 |
| 3.6    | GI:157951643 | Actn2        | NP_150371.4    | <u>34</u>             | <u>0.05</u> | <u>27</u>  | <b>28</b>  | <u>26</u>  | <b>27</b>  | alpha-actinin-2 [Mus musculus]                                                             | 104 |
| 32.1   | GI:7305031   | Epb4.113     | NP_038841.1    | <u>28</u>             | <u>0.06</u> | <u>18</u>  | <b>23</b>  | <u>20</u>  | <b>22</b>  | band 4.1-like protein 3 [Mus musculus]                                                     | 103 |
| 196.1  | GI:69885032  | Mbp          | NP_001020422.1 | <u>12</u>             | <u>0.07</u> | <u>11</u>  | <b>40</b>  | <u>10</u>  | <b>38</b>  | myelin basic protein isoform 1 [Mus musculus]                                              | 21  |
| 6.1    | GI:51491845  | Cltc         | NP_001003908.1 | <u>83</u>             | <u>0.08</u> | <u>69</u>  | <b>96</b>  | <u>68</u>  | <b>91</b>  | clathrin heavy chain 1 [Mus musculus]                                                      | 191 |
| 37.1   | GI:33859488  | Tubb2a       | NP_033476.1    | <u>27</u>             | <u>0.08</u> | <u>24</u>  | <b>93</b>  | <u>25</u>  | <b>88</b>  | tubulin beta-2A chain [Mus musculus]                                                       | 50  |
| 33.2   | GI:162461907 | Hspa9        | NP_034611.2    | <u>21</u>             | <u>0.08</u> | <u>16</u>  | <b>18</b>  | <u>17</u>  | <b>17</b>  | stress-70 protein, mitochondrial [Mus musculus]                                            | 73  |
| 12.1   | GI:116089329 | Srcin1       | NP_061361.2    | <u>41</u>             | <u>0.08</u> | <u>29</u>  | <b>35</b>  | <u>26</u>  | <b>33</b>  | SRC kinase signaling inhibitor 1 [Mus musculus]                                            | 131 |
| 72.1   | GI:225735584 | Hk1          | NP_001139572.1 | <u>20</u>             | <u>0.09</u> | <u>16</u>  | <b>16</b>  | <u>15</u>  | <b>15</b>  | hexokinase-1 isoform HK1 [Mus musculus]                                                    | 102 |



|       |              |         |                |                       |             |            |            |            |            |                                                                                        |     |
|-------|--------------|---------|----------------|-----------------------|-------------|------------|------------|------------|------------|----------------------------------------------------------------------------------------|-----|
| 109.1 | GI:27734986  | Aheyl1  | NP_663517.2    | <u>16</u>             | <u>0.09</u> | <u>14</u>  | <b>16</b>  | <u>12</u>  | <b>15</b>  | putative adenosylhomocysteinase 2 [Mus musculus]                                       | 59  |
| 71.1  | GI:70906474  | Cadps   | NP_036191.2    | <u>20</u>             | <u>0.11</u> | <u>13</u>  | <b>14</b>  | <u>13</u>  | <b>13</b>  | calcium-dependent secretion activator 1 isoform 1 [Mus musculus]                       | 154 |
| 71.2  | GI:110825966 | Cadps   | NP_001036082.1 | <u>20</u>             | <u>0.11</u> | <u>13</u>  | <b>14</b>  | <u>13</u>  | <b>13</b>  | calcium-dependent secretion activator 1 isoform 2 [Mus musculus]                       | 153 |
| 119.1 | GI:6753074   | Ap2m1   | NP_033809.1    | <u>15</u>             | <u>0.11</u> | <u>10</u>  | <b>14</b>  | <u>10</u>  | <b>13</b>  | AP-2 complex subunit mu [Mus musculus]                                                 | 50  |
| 35.1  | GI:6755901   | Tuba1a  | NP_035783.1    | <u>28</u>             | <u>0.11</u> | <u>23</u>  | <b>68</b>  | <u>24</u>  | <b>63</b>  | tubulin alpha-1A chain [Mus musculus]                                                  | 50  |
| 170.2 | GI:154090941 | Krt42   | NP_997648.2    | <u>10</u>             | <u>0.12</u> | <u>9</u>   | <b>13</b>  | <u>10</u>  | <b>12</b>  | keratin, type I cytoskeletal 42 [Mus musculus]                                         | 50  |
| 1.1   | GI:254675195 | Plec    | NP_035247.2    | <u>17</u><br><u>1</u> | <u>0.13</u> | <u>129</u> | <b>144</b> | <u>123</u> | <b>132</b> | plectin isoform 1c [Mus musculus]                                                      | 519 |
| 272.1 | GI:31982332  | Glul    | NP_032157.2    | <u>9</u>              | <u>0.13</u> | <u>9</u>   | <b>12</b>  | <u>8</u>   | <b>11</b>  | glutamine synthetase [Mus musculus]                                                    | 42  |
| 3.1   | GI:117938332 | Sptbn1  | NP_787030.2    | <u>12</u><br><u>4</u> | <u>0.13</u> | <u>104</u> | <b>143</b> | <u>98</u>  | <b>131</b> | spectrin beta chain, non-erythrocytic 1 isoform 1 [Mus musculus]                       | 274 |
| 13.1  | GI:113204613 | Map6    | NP_034967.2    | <u>39</u>             | <u>0.13</u> | <u>30</u>  | <b>34</b>  | <u>31</u>  | <b>31</b>  | microtubule-associated protein 6 isoform 1 [Mus musculus]                              | 96  |
| 201.1 | GI:269973917 | Gphn    | NP_666077.2    | <u>12</u>             | <u>0.14</u> | <u>11</u>  | <b>11</b>  | <u>9</u>   | <b>10</b>  | gephyrin isoform 1 [Mus musculus]                                                      | 84  |
| 287.1 | GI:6671672   | Capza2  | NP_031630.1    | <u>9</u>              | <u>0.14</u> | <u>8</u>   | <b>11</b>  | <u>8</u>   | <b>10</b>  | F-actin-capping protein subunit alpha-2 [Mus musculus]                                 | 33  |
| 359.1 | GI:6680718   | Arf3    | NP_031504.1    | <u>8</u>              | <u>0.14</u> | <u>8</u>   | <b>11</b>  | <u>7</u>   | <b>10</b>  | ADP-ribosylation factor 3 [Mus musculus]                                               | 21  |
| 37.4  | GI:12963615  | Tubb3   | NP_075768.1    | <u>24</u>             | <u>0.15</u> | <u>21</u>  | <b>62</b>  | <u>20</u>  | <b>56</b>  | tubulin beta-3 chain [Mus musculus]                                                    | 50  |
| 138.1 | GI:158303337 | Synpo   | NP_001103445.1 | <u>15</u>             | <u>0.15</u> | <u>13</u>  | <b>20</b>  | <u>14</u>  | <b>18</b>  | synaptopodin isoform B [Mus musculus]                                                  | 74  |
| 154.3 | GI:31543976  | Ywhag   | NP_061359.2    | <u>12</u>             | <u>0.15</u> | <u>10</u>  | <b>10</b>  | <u>9</u>   | <b>9</b>   | 14-3-3 protein gamma [Mus musculus]                                                    | 28  |
| 193.1 | GI:210147430 | Slc4a4  | NP_001129732.1 | <u>12</u>             | <u>0.15</u> | <u>10</u>  | <b>10</b>  | <u>9</u>   | <b>9</b>   | electrogenic sodium bicarbonate cotransporter 1 isoform b [Mus musculus]               | 123 |
| 240.1 | GI:18700024  | Idh3b   | NP_570954.1    | <u>10</u>             | <u>0.15</u> | <u>9</u>   | <b>10</b>  | <u>8</u>   | <b>9</b>   | isocitrate dehydrogenase 3, beta subunit [Mus musculus]                                | 42  |
| 296.1 | GI:9506983   | Ppp2ca  | NP_062284.1    | <u>9</u>              | <u>0.15</u> | <u>8</u>   | <b>10</b>  | <u>9</u>   | <b>9</b>   | serine/threonine-protein phosphatase 2A catalytic subunit alpha isoform [Mus musculus] | 36  |
| 37.3  | GI:21746161  | Tubb2b  | NP_076205.1    | <u>25</u>             | <u>0.15</u> | <u>24</u>  | <b>89</b>  | <u>23</u>  | <b>80</b>  | tubulin beta-2B chain [Mus musculus]                                                   | 50  |
| 37.5  | GI:31981939  | Tubb4a  | NP_033477.2    | <u>23</u>             | <u>0.16</u> | <u>22</u>  | <b>78</b>  | <u>21</u>  | <b>70</b>  | tubulin beta-4A chain [Mus musculus]                                                   | 50  |
| 28.1  | GI:165972305 | Stxbp1  | NP_033321.2    | <u>30</u>             | <u>0.16</u> | <u>23</u>  | <b>29</b>  | <u>23</u>  | <b>26</b>  | syntaxin-binding protein 1 isoform b [Mus musculus]                                    | 68  |
| 163.1 | GI:154240682 | Cep170b | NP_001019773.2 | <u>13</u>             | <u>0.17</u> | <u>9</u>   | <b>9</b>   | <u>7</u>   | <b>8</b>   | centrosomal protein of 170 kDa protein B [Mus musculus]                                | 171 |
| 170.4 | GI:6680604   | Krt16   | NP_032496.1    | <u>8</u>              | <u>0.17</u> | <u>5</u>   | <b>9</b>   | <u>7</u>   | <b>8</b>   | keratin, type I cytoskeletal 16 [Mus musculus]                                         | 52  |
| 187.2 | GI:251823810 | Mark3   | NP_067491.2    | <u>12</u>             | <u>0.17</u> | <u>9</u>   | <b>9</b>   | <u>5</u>   | <b>8</b>   | MAP/microtubule affinity-regulating kinase 3 isoform 1 [Mus musculus]                  | 83  |
| 198.1 | GI:35215309  | Nfasc   | NP_874385.1    | <u>12</u>             | <u>0.17</u> | <u>9</u>   | <b>9</b>   | <u>7</u>   | <b>8</b>   | neurofascin isoform 1 precursor [Mus musculus]                                         | 138 |
| 211.1 | GI:160298209 | Got1    | NP_034454.2    | <u>11</u>             | <u>0.17</u> | <u>9</u>   | <b>9</b>   | <u>8</u>   | <b>8</b>   | aspartate aminotransferase, cytoplasmic [Mus musculus]                                 | 46  |
| 228.1 | GI:83816899  | Dgkb    | NP_848796.2    | <u>10</u>             | <u>0.17</u> | <u>7</u>   | <b>9</b>   | <u>8</u>   | <b>8</b>   | diacylglycerol kinase beta [Mus musculus]                                              | 89  |
| 296.2 | GI:8394024   | Ppp2cb  | NP_059070.1    | <u>9</u>              | <u>0.17</u> | <u>7</u>   | <b>9</b>   | <u>8</u>   | <b>8</b>   | serine/threonine-protein phosphatase 2A catalytic subunit beta isoform [Mus musculus]  | 36  |
| 322.1 | GI:254553321 | Rps3a1  | NP_058655.3    | <u>8</u>              | <u>0.17</u> | <u>6</u>   | <b>9</b>   | <u>6</u>   | <b>8</b>   | 40S ribosomal protein S3a [Mus musculus]                                               | 30  |

|       |              |        |                |           |             |           |           |           |           |                                                                                           |     |
|-------|--------------|--------|----------------|-----------|-------------|-----------|-----------|-----------|-----------|-------------------------------------------------------------------------------------------|-----|
| 395.1 | GI:16945962  | Rph3a  | NP_035416.1    | <u>7</u>  | <u>0.17</u> | <u>6</u>  | <b>9</b>  | <u>7</u>  | <b>8</b>  | rabphilin-3A [Mus musculus]                                                               | 75  |
| 37.6  | GI:22165384  | Tubb4b | NP_666228.1    | <u>22</u> | <u>0.18</u> | <u>22</u> | <b>77</b> | <u>20</u> | <b>68</b> | tubulin beta-4B chain [Mus musculus]                                                      | 50  |
| 59.1  | GI:19527256  | Ddx1   | NP_598801.1    | <u>21</u> | <u>0.18</u> | <u>16</u> | <b>17</b> | <u>14</u> | <b>15</b> | ATP-dependent RNA helicase DDX1 [Mus musculus]                                            | 82  |
| 96.1  | GI:37202121  | Abat   | NP_766549.2    | <u>17</u> | <u>0.18</u> | <u>15</u> | <b>17</b> | <u>13</u> | <b>15</b> | 4-aminobutyrate aminotransferase, mitochondrial isoform 1 precursor [Mus musculus]        | 56  |
| 16.1  | GI:114145561 | Krt8   | NP_112447.2    | <u>8</u>  | <u>0.19</u> | <u>7</u>  | <b>8</b>  | <u>5</u>  | <b>7</b>  | keratin, type II cytoskeletal 8 [Mus musculus]                                            | 55  |
| 16.13 | GI:51092293  | Krt77  | NP_001003667.1 | <u>6</u>  | <u>0.19</u> | <u>6</u>  | <b>8</b>  | <u>5</u>  | <b>7</b>  | keratin, type II cytoskeletal 1b [Mus musculus]                                           | 61  |
| 36.1  | GI:18079339  | Aco2   | NP_542364.1    | <u>27</u> | <u>0.19</u> | <u>22</u> | <b>24</b> | <u>20</u> | <b>21</b> | aconitate hydratase, mitochondrial precursor [Mus musculus]                               | 85  |
| 46.4  | GI:291291008 | Camk2b | NP_001167524.1 | <u>20</u> | <u>0.19</u> | <u>16</u> | <b>24</b> | <u>13</u> | <b>21</b> | calcium/calmodulin-dependent protein kinase type II subunit beta isoform 1 [Mus musculus] | 61  |
| 86.2  | GI:221554491 | Ppfia4 | NP_001138327.1 | <u>9</u>  | <u>0.19</u> | <u>7</u>  | <b>8</b>  | <u>6</u>  | <b>7</b>  | liprin-alpha-4 [Mus musculus]                                                             | 134 |
| 113.1 | GI:9910164   | Dclk1  | NP_064362.1    | <u>16</u> | <u>0.19</u> | <u>16</u> | <b>16</b> | <u>12</u> | <b>14</b> | serine/threonine-protein kinase DCLK1 isoform 1 [Mus musculus]                            | 84  |
| 149.1 | GI:6681273   | Eef1a2 | NP_031932.1    | <u>14</u> | <u>0.19</u> | <u>11</u> | <b>16</b> | <u>10</u> | <b>14</b> | elongation factor 1-alpha 2 [Mus musculus]                                                | 50  |
| 174.1 | GI:251823980 | Pcx    | NP_001156418.1 | <u>13</u> | <u>0.19</u> | <u>8</u>  | <b>8</b>  | <u>7</u>  | <b>7</b>  | pyruvate carboxylase, mitochondrial isoform 1 [Mus musculus]                              | 130 |
| 182.1 | GI:241982771 | Pi4ka  | NP_001001983.2 | <u>12</u> | <u>0.19</u> | <u>8</u>  | <b>8</b>  | <u>7</u>  | <b>7</b>  | phosphatidylinositol 4-kinase type 3 alpha [Mus musculus]                                 | 231 |
| 207.1 | GI:45598372  | Baspl  | NP_081671.1    | <u>11</u> | <u>0.19</u> | <u>11</u> | <b>16</b> | <u>11</u> | <b>14</b> | brain acid soluble protein 1 [Mus musculus]                                               | 22  |
| 229.1 | GI:82617575  | Eprs   | NP_084011.1    | <u>10</u> | <u>0.19</u> | <u>8</u>  | <b>8</b>  | <u>7</u>  | <b>7</b>  | bifunctional glutamate/proline--tRNA ligase [Mus musculus]                                | 170 |
| 250.1 | GI:11528518  | Sv2a   | NP_071313.1    | <u>10</u> | <u>0.19</u> | <u>7</u>  | <b>8</b>  | <u>6</u>  | <b>7</b>  | synaptic vesicle glycoprotein 2A [Mus musculus]                                           | 83  |
| 260.1 | GI:358248329 | Dhx30  | NP_001239612.1 | <u>10</u> | <u>0.19</u> | <u>8</u>  | <b>8</b>  | <u>7</u>  | <b>7</b>  | putative ATP-dependent RNA helicase DHX30 isoform 3 [Mus musculus]                        | 136 |
| 264.1 | GI:255759892 | Add3   | NP_001157573.1 | <u>10</u> | <u>0.19</u> | <u>8</u>  | <b>8</b>  | <u>7</u>  | <b>7</b>  | gamma-adducin isoform b [Mus musculus]                                                    | 75  |
| 297.1 | GI:355390287 | Rbmx1l | NP_001239018.1 | <u>9</u>  | <u>0.19</u> | <u>6</u>  | <b>8</b>  | <u>5</u>  | <b>7</b>  | RNA binding motif protein, X-linked-like-1 [Mus musculus]                                 | 42  |
| 307.1 | GI:6753992   | Gja1   | NP_034418.1    | <u>8</u>  | <u>0.19</u> | <u>6</u>  | <b>8</b>  | <u>6</u>  | <b>7</b>  | gap junction alpha-1 protein [Mus musculus]                                               | 43  |
| 319.1 | GI:32189434  | Igsf8  | NP_536344.1    | <u>8</u>  | <u>0.19</u> | <u>7</u>  | <b>8</b>  | <u>5</u>  | <b>7</b>  | immunoglobulin superfamily member 8 precursor [Mus musculus]                              | 65  |
| 350.2 | GI:71037403  | Myl12a | NP_080340.2    | <u>8</u>  | <u>0.19</u> | <u>7</u>  | <b>8</b>  | <u>5</u>  | <b>7</b>  | myosin light chain, regulatory B-like [Mus musculus]                                      | 20  |
| 416.1 | GI:83699424  | Rpl18  | NP_033103.2    | <u>7</u>  | <u>0.19</u> | <u>6</u>  | <b>8</b>  | <u>5</u>  | <b>7</b>  | 60S ribosomal protein L18 [Mus musculus]                                                  | 22  |
| 425.1 | GI:94388507  | Gm8290 | XP_001002269.1 | <u>7</u>  | <u>0.19</u> | <u>6</u>  | <b>8</b>  | <u>5</u>  | <b>7</b>  | PREDICTED: 60S ribosomal protein L23a-like [Mus musculus]                                 | 17  |
| 37.2  | GI:7106439   | Tubb5  | NP_035785.1    | <u>26</u> | <u>0.20</u> | <u>26</u> | <b>92</b> | <u>24</u> | <b>80</b> | tubulin beta-5 chain [Mus musculus]                                                       | 50  |
| 38.1  | GI:311893358 | Dctn1  | NP_001185795.1 | <u>27</u> | <u>0.21</u> | <u>21</u> | <b>22</b> | <u>19</u> | <b>19</b> | dynactin subunit 1 isoform 2 [Mus musculus]                                               | 140 |
| 11.1  | GI:22094119  | Myo18a | NP_035716.1    | <u>44</u> | <u>0.22</u> | <u>35</u> | <b>36</b> | <u>30</u> | <b>31</b> | unconventional myosin-XVIIa [Mus musculus]                                                | 231 |
| 10.1  | GI:124487407 | Bsn    | NP_031593.2    | <u>65</u> | <u>0.22</u> | <u>49</u> | <b>49</b> | <u>42</u> | <b>42</b> | protein bassoon [Mus musculus]                                                            | 419 |
| 20.2  | GI:163644277 | Ap2a2  | NP_031485.3    | <u>30</u> | <u>0.22</u> | <u>23</u> | <b>28</b> | <u>21</u> | <b>24</b> | AP-2 complex subunit alpha-2 [Mus musculus]                                               | 104 |
| 21.3  | GI:77681981  | Ank2   | NP_001029340.1 | <u>9</u>  | <u>0.22</u> | <u>6</u>  | <b>7</b>  | <u>6</u>  | <b>6</b>  | ankyrin-2 isoform 3 [Mus musculus]                                                        | 103 |
| 30.1  | GI:6680954   | Cntn1  | NP_031753.1    | <u>29</u> | <u>0.22</u> | <u>25</u> | <b>28</b> | <u>22</u> | <b>24</b> | contactin-1 precursor [Mus musculus]                                                      | 113 |

|       |              |          |                |                       |             |           |            |           |           |                                                                                                   |     |
|-------|--------------|----------|----------------|-----------------------|-------------|-----------|------------|-----------|-----------|---------------------------------------------------------------------------------------------------|-----|
| 31.1  | GI:40254595  | Dpysl2   | NP_034085.2    | <u>29</u>             | <u>0.22</u> | <u>23</u> | <b>42</b>  | <u>24</u> | <b>36</b> | dihydropyrimidinase-related protein 2 [Mus musculus]                                              | 62  |
| 170.5 | GI:226823220 | Krt15    | NP_032495.2    | <u>6</u>              | <u>0.22</u> | <u>5</u>  | <b>7</b>   | <u>5</u>  | <b>6</b>  | keratin, type I cytoskeletal 15 [Mus musculus]                                                    | 49  |
| 323.1 | GI:247269309 | Cmas     | NP_034038.2    | <u>8</u>              | <u>0.22</u> | <u>7</u>  | <b>7</b>   | <u>6</u>  | <b>6</b>  | N-acylneuraminase cytidylyltransferase [Mus musculus]                                             | 48  |
| 345.1 | GI:31560792  | Sh3gl2   | NP_062408.2    | <u>8</u>              | <u>0.22</u> | <u>6</u>  | <b>7</b>   | <u>5</u>  | <b>6</b>  | endophilin-A1 [Mus musculus]                                                                      | 40  |
| 362.1 | GI:359279908 | Tpm3     | NP_001240669.1 | <u>8</u>              | <u>0.22</u> | <u>7</u>  | <b>7</b>   | <u>6</u>  | <b>6</b>  | tropomyosin alpha-3 chain isoform 4 [Mus musculus]                                                | 29  |
| 383.1 | GI:6753036   | Aldh2    | NP_033786.1    | <u>7</u>              | <u>0.22</u> | <u>7</u>  | <b>7</b>   | <u>6</u>  | <b>6</b>  | aldehyde dehydrogenase, mitochondrial precursor [Mus musculus]                                    | 57  |
| 384.1 | GI:58037117  | Ndufs3   | NP_080964.1    | <u>7</u>              | <u>0.22</u> | <u>6</u>  | <b>7</b>   | <u>5</u>  | <b>6</b>  | NADH dehydrogenase [ubiquinone] iron-sulfur protein 3, mitochondrial precursor [Mus musculus]     | 30  |
| 478.1 | GI:13385472  | Rpl14    | NP_080250.1    | <u>6</u>              | <u>0.22</u> | <u>5</u>  | <b>7</b>   | <u>6</u>  | <b>6</b>  | 60S ribosomal protein L14 [Mus musculus]                                                          | 24  |
| 3.2   | GI:55926127  | Sptbn2   | NP_067262.1    | <u>10</u><br><u>5</u> | <u>0.23</u> | <u>83</u> | <b>108</b> | <u>79</u> | <b>92</b> | spectrin beta chain, brain 2 [Mus musculus]                                                       | 271 |
| 33.1  | GI:31981690  | Hspa8    | NP_112442.2    | <u>28</u>             | <u>0.23</u> | <u>22</u> | <b>40</b>  | <u>25</u> | <b>34</b> | heat shock cognate 71 kDa protein [Mus musculus]                                                  | 71  |
| 129.1 | GI:28461135  | Hspa12a  | NP_780408.1    | <u>15</u>             | <u>0.24</u> | <u>13</u> | <b>13</b>  | <u>11</u> | <b>11</b> | heat shock 70 kDa protein 12A [Mus musculus]                                                      | 75  |
| 150.1 | GI:427918095 | Add2     | NP_001258788.1 | <u>14</u>             | <u>0.24</u> | <u>11</u> | <b>13</b>  | <u>11</u> | <b>11</b> | beta-adducin isoform 1 [Mus musculus]                                                             | 81  |
| 177.1 | GI:84875537  | Ncl      | NP_035010.3    | <u>12</u>             | <u>0.24</u> | <u>12</u> | <b>13</b>  | <u>11</u> | <b>11</b> | nucleolin [Mus musculus]                                                                          | 77  |
| 197.1 | GI:66773171  | Ablim2   | NP_808346.3    | <u>12</u>             | <u>0.24</u> | <u>10</u> | <b>13</b>  | <u>8</u>  | <b>11</b> | actin-binding LIM protein 2 isoform 3 [Mus musculus]                                              | 68  |
| 126.1 | GI:124487099 | Hnrnpul2 | NP_001074665.1 | <u>15</u>             | <u>0.26</u> | <u>12</u> | <b>12</b>  | <u>8</u>  | <b>10</b> | heterogeneous nuclear ribonucleoprotein U-like protein 2 [Mus musculus]                           | 85  |
| 147.1 | GI:114326546 | Pgam1    | NP_075907.2    | <u>14</u>             | <u>0.26</u> | <u>12</u> | <b>12</b>  | <u>9</u>  | <b>10</b> | phosphoglycerate mutase 1 [Mus musculus]                                                          | 29  |
| 165.2 | GI:116089273 | Gdi2     | NP_032138.3    | <u>9</u>              | <u>0.26</u> | <u>6</u>  | <b>6</b>   | <u>5</u>  | <b>5</b>  | rab GDP dissociation inhibitor beta [Mus musculus]                                                | 51  |
| 166.1 | GI:119120865 | Syne1    | NP_001073154.1 | <u>13</u>             | <u>0.26</u> | <u>6</u>  | <b>6</b>   | <u>5</u>  | <b>5</b>  | nesprin-1 isoform 3 [Mus musculus]                                                                | 344 |
| 186.2 | GI:13385392  | Napa     | NP_080174.1    | <u>9</u>              | <u>0.26</u> | <u>6</u>  | <b>6</b>   | <u>5</u>  | <b>5</b>  | alpha-soluble NSF attachment protein [Mus musculus]                                               | 33  |
| 265.1 | GI:254675279 | Tjp1     | NP_001157046.1 | <u>10</u>             | <u>0.26</u> | <u>6</u>  | <b>6</b>   | <u>5</u>  | <b>5</b>  | tight junction protein ZO-1 isoform 2 [Mus musculus]                                              | 189 |
| 267.1 | GI:6755372   | Rps3     | NP_036182.1    | <u>9</u>              | <u>0.26</u> | <u>9</u>  | <b>12</b>  | <u>8</u>  | <b>10</b> | 40S ribosomal protein S3 [Mus musculus]                                                           | 27  |
| 269.1 | GI:54607098  | Sdha     | NP_075770.1    | <u>9</u>              | <u>0.26</u> | <u>6</u>  | <b>6</b>   | <u>5</u>  | <b>5</b>  | succinate dehydrogenase [ubiquinone] flavoprotein subunit, mitochondrial precursor [Mus musculus] | 73  |
| 344.1 | GI:40254361  | Hspa4l   | NP_035150.3    | <u>8</u>              | <u>0.26</u> | <u>6</u>  | <b>6</b>   | <u>5</u>  | <b>5</b>  | heat shock 70 kDa protein 4L [Mus musculus]                                                       | 94  |
| 363.1 | GI:329755243 | Gsn      | NP_001193298.1 | <u>8</u>              | <u>0.26</u> | <u>6</u>  | <b>6</b>   | <u>4</u>  | <b>5</b>  | gelsolin isoform 2 [Mus musculus]                                                                 | 81  |
| 368.2 | GI:124486670 | Slc25a18 | NP_001074517.1 | <u>6</u>              | <u>0.26</u> | <u>5</u>  | <b>6</b>   | <u>4</u>  | <b>5</b>  | mitochondrial glutamate carrier 2 [Mus musculus]                                                  | 34  |
| 371.1 | GI:238637279 | Slc3a2   | NP_032603.3    | <u>8</u>              | <u>0.26</u> | <u>6</u>  | <b>6</b>   | <u>5</u>  | <b>5</b>  | 4F2 cell-surface antigen heavy chain isoform b [Mus musculus]                                     | 58  |
| 477.1 | GI:13385624  | Eif2s1   | NP_080390.1    | <u>6</u>              | <u>0.26</u> | <u>6</u>  | <b>6</b>   | <u>5</u>  | <b>5</b>  | eukaryotic translation initiation factor 2 subunit 1 [Mus musculus]                               | 36  |
| 505.1 | GI:6755967   | Vdac3    | NP_035826.1    | <u>6</u>              | <u>0.26</u> | <u>5</u>  | <b>6</b>   | <u>4</u>  | <b>5</b>  | voltage-dependent anion-selective channel protein 3 isoform 2 [Mus musculus]                      | 31  |
| 540.1 | GI:6753138   | Atp1b1   | NP_033851.1    | <u>5</u>              | <u>0.26</u> | <u>5</u>  | <b>6</b>   | <u>5</u>  | <b>5</b>  | sodium/potassium-transporting ATPase subunit beta-1 [Mus musculus]                                | 35  |
| 602.1 | GI:31981100  | Rps14    | NP_065625.2    | <u>5</u>              | <u>0.26</u> | <u>5</u>  | <b>6</b>   | <u>4</u>  | <b>5</b>  | 40S ribosomal protein S14 [Mus musculus]                                                          | 16  |

|       |              |          |                |    |      |    |    |    |    |                                                                                           |     |
|-------|--------------|----------|----------------|----|------|----|----|----|----|-------------------------------------------------------------------------------------------|-----|
| 621.1 | GI:63572172  | Gm5908   | XP_620643.1    | 5  | 0.26 | 4  | 6  | 4  | 5  | PREDICTED: 60S ribosomal protein L27a-like [Mus musculus]                                 | 17  |
| 134.2 | GI:22094075  | Slc25a5  | NP_031477.1    | 12 | 0.28 | 12 | 17 | 10 | 14 | ADP/ATP translocase 2 [Mus musculus]                                                      | 33  |
| 27.1  | GI:6754254   | Hsp90aa1 | NP_034610.1    | 31 | 0.28 | 24 | 28 | 20 | 23 | heat shock protein HSP 90-alpha [Mus musculus]                                            | 85  |
| 46.2  | GI:226693349 | Camk2b   | NP_031621.3    | 22 | 0.28 | 19 | 28 | 15 | 23 | calcium/calmodulin-dependent protein kinase type II subunit beta isoform 2 [Mus musculus] | 60  |
| 16.12 | GI:126116585 | Krt1     | NP_032499.2    | 6  | 0.29 | 6  | 11 | 5  | 9  | keratin, type II cytoskeletal 1 [Mus musculus]                                            | 66  |
| 127.1 | GI:124486885 | Lrrc7    | NP_001074827.1 | 15 | 0.29 | 10 | 11 | 9  | 9  | leucine-rich repeat-containing protein 7 [Mus musculus]                                   | 173 |
| 167.2 | GI:31980772  | Ppp1cc   | NP_038664.2    | 11 | 0.29 | 10 | 11 | 8  | 9  | serine/threonine-protein phosphatase PP1-gamma catalytic subunit [Mus musculus]           | 37  |
| 184.1 | GI:124487319 | Cit      | NP_031734.3    | 12 | 0.29 | 11 | 11 | 9  | 9  | citron Rho-interacting kinase [Mus musculus]                                              | 235 |
| 217.1 | GI:90186270  | Map2     | NP_001035023.1 | 11 | 0.29 | 10 | 11 | 8  | 9  | microtubule-associated protein 2 isoform 1 [Mus musculus]                                 | 53  |
| 225.1 | GI:229892320 | Ndufs1   | NP_001153511.1 | 11 | 0.29 | 11 | 11 | 9  | 9  | NADH-ubiquinone oxidoreductase 75 kDa subunit, mitochondrial precursor [Mus musculus]     | 80  |
| 295.1 | GI:33620739  | Myl6     | NP_034990.1    | 9  | 0.29 | 9  | 11 | 7  | 9  | myosin light polypeptide 6 [Mus musculus]                                                 | 17  |
| 3.3   | GI:61097906  | Actn1    | NP_598917.1    | 46 | 0.30 | 38 | 54 | 33 | 44 | alpha-actinin-1 [Mus musculus]                                                            | 103 |
| 26.1  | GI:31543349  | Nsf      | NP_032766.2    | 31 | 0.30 | 23 | 27 | 20 | 22 | vesicle-fusing ATPase [Mus musculus]                                                      | 83  |
| 91.1  | GI:31560731  | Atp6v1a  | NP_031534.2    | 17 | 0.30 | 15 | 16 | 12 | 13 | V-type proton ATPase catalytic subunit A [Mus musculus]                                   | 68  |
| 34.1  | GI:78711838  | Ap2b1    | NP_001030931.1 | 28 | 0.31 | 21 | 26 | 19 | 21 | AP-2 complex subunit beta isoform a [Mus musculus]                                        | 106 |
| 21.1  | GI:25121946  | Ank3     | NP_733789.1    | 33 | 0.31 | 26 | 31 | 22 | 25 | ankyrin-3 isoform c [Mus musculus]                                                        | 193 |
| 8.1   | GI:115511052 | Myo5a    | NP_034994.2    | 67 | 0.32 | 56 | 70 | 48 | 56 | unconventional myosin-Va [Mus musculus]                                                   | 215 |
| 17.3  | GI:21450277  | Atp1a1   | NP_659149.1    | 31 | 0.32 | 25 | 35 | 19 | 28 | sodium/potassium-transporting ATPase subunit alpha-1 precursor [Mus musculus]             | 113 |
| 53.2  | GI:61657921  | Kif5b    | NP_032474.2    | 14 | 0.32 | 9  | 10 | 8  | 8  | kinesin-1 heavy chain [Mus musculus]                                                      | 109 |
| 61.3  | GI:53832028  | Iqsec2   | NP_001005475.1 | 11 | 0.32 | 10 | 10 | 8  | 8  | IQ motif and SEC7 domain-containing protein 2 isoform 2 [Mus musculus]                    | 105 |
| 98.1  | GI:6681195   | Dlg4     | NP_031890.1    | 17 | 0.32 | 12 | 15 | 10 | 12 | disks large homolog 4 isoform 1 [Mus musculus]                                            | 80  |
| 122.1 | GI:30794450  | Rpl4     | NP_077174.1    | 15 | 0.32 | 14 | 20 | 13 | 16 | 60S ribosomal protein L4 [Mus musculus]                                                   | 47  |
| 128.1 | GI:84370300  | Agap2    | NP_001028435.1 | 15 | 0.32 | 10 | 10 | 8  | 8  | arf-GAP with GTPase, ANK repeat and PH domain-containing protein 2 [Mus musculus]         | 124 |
| 167.5 | GI:45592930  | Ppp3cb   | NP_032940.1    | 6  | 0.32 | 5  | 5  | 4  | 4  | serine/threonine-protein phosphatase 2B catalytic subunit beta isoform [Mus musculus]     | 59  |
| 169.3 | GI:41054806  | Gnai2    | NP_032164.2    | 6  | 0.32 | 5  | 5  | 4  | 4  | guanine nucleotide-binding protein G(i) subunit alpha-2 [Mus musculus]                    | 40  |
| 186.1 | GI:29789104  | Napb     | NP_062606.1    | 12 | 0.32 | 10 | 10 | 8  | 8  | beta-soluble NSF attachment protein [Mus musculus]                                        | 34  |
| 187.1 | GI:224922757 | Mark1    | NP_663490.2    | 12 | 0.32 | 10 | 10 | 5  | 8  | serine/threonine-protein kinase MARK1 [Mus musculus]                                      | 88  |
| 257.1 | GI:94383782  | Gm8841   | XP_997963.1    | 10 | 0.32 | 8  | 10 | 7  | 8  | PREDICTED: 40S ribosomal protein S2-like [Mus musculus]                                   | 31  |
| 332.1 | GI:146219837 | Eif3a    | NP_034253.3    | 8  | 0.32 | 5  | 5  | 4  | 4  | eukaryotic translation initiation factor 3 subunit A [Mus musculus]                       | 162 |
| 356.1 | GI:7305305   | Ndrp2    | NP_038892.1    | 8  | 0.32 | 5  | 5  | 4  | 4  | protein NDRG2 isoform 1 [Mus musculus]                                                    | 41  |
| 359.2 | GI:6680720   | Arf4     | NP_031505.1    | 5  | 0.32 | 5  | 5  | 3  | 4  | ADP-ribosylation factor 4 [Mus musculus]                                                  | 20  |

|       |              |           |                |           |             |           |           |           |           |                                                                                                  |     |
|-------|--------------|-----------|----------------|-----------|-------------|-----------|-----------|-----------|-----------|--------------------------------------------------------------------------------------------------|-----|
| 365.1 | GI:313151222 | Acly      | NP_001186225.1 | <u>8</u>  | <u>0.32</u> | <u>5</u>  | <b>5</b>  | <u>4</u>  | <u>4</u>  | ATP-citrate synthase isoform 1 [Mus musculus]                                                    | 121 |
| 375.1 | GI:114052522 | Mink1     | NP_001039424.1 | <u>8</u>  | <u>0.32</u> | <u>5</u>  | <b>5</b>  | <u>4</u>  | <u>4</u>  | misshapen-like kinase 1 isoform 3 [Mus musculus]                                                 | 150 |
| 403.1 | GI:12963799  | Atp6v1d   | NP_076210.1    | <u>7</u>  | <u>0.32</u> | <u>5</u>  | <b>5</b>  | <u>4</u>  | <u>4</u>  | V-type proton ATPase subunit D [Mus musculus]                                                    | 28  |
| 430.1 | GI:55743143  | Rab11fip5 | NP_803417.3    | <u>7</u>  | <u>0.32</u> | <u>5</u>  | <b>5</b>  | <u>3</u>  | <u>4</u>  | rab11 family-interacting protein 5 isoform 2 [Mus musculus]                                      | 70  |
| 434.1 | GI:37693505  | Abi2      | NP_937760.1    | <u>7</u>  | <u>0.32</u> | <u>5</u>  | <b>5</b>  | <u>4</u>  | <u>4</u>  | abl interactor 2 isoform 3 [Mus musculus]                                                        | 49  |
| 461.1 | GI:33504483  | Rps9      | NP_084043.1    | <u>6</u>  | <u>0.32</u> | <u>5</u>  | <b>5</b>  | <u>3</u>  | <u>4</u>  | 40S ribosomal protein S9 [Mus musculus]                                                          | 23  |
| 463.1 | GI:30519943  | Samm50    | NP_848729.1    | <u>6</u>  | <u>0.32</u> | <u>5</u>  | <b>5</b>  | <u>4</u>  | <u>4</u>  | sorting and assembly machinery component 50 homolog [Mus musculus]                               | 52  |
| 472.1 | GI:161760627 | Cdh2      | NP_031690.3    | <u>6</u>  | <u>0.32</u> | <u>5</u>  | <b>5</b>  | <u>4</u>  | <u>4</u>  | cadherin-2 precursor [Mus musculus]                                                              | 100 |
| 510.1 | GI:42558248  | Caprin1   | NP_058019.2    | <u>6</u>  | <u>0.32</u> | <u>5</u>  | <b>5</b>  | <u>4</u>  | <u>4</u>  | caprin-1 isoform a [Mus musculus]                                                                | 78  |
| 516.1 | GI:258547148 | Dnaja1    | NP_001158144.1 | <u>6</u>  | <u>0.32</u> | <u>5</u>  | <b>5</b>  | <u>3</u>  | <u>4</u>  | dnaJ homolog subfamily A member 1 [Mus musculus]                                                 | 45  |
| 521.1 | GI:164607135 | Gls       | NP_001106854.1 | <u>6</u>  | <u>0.32</u> | <u>5</u>  | <b>5</b>  | <u>4</u>  | <u>4</u>  | glutaminase kidney isoform, mitochondrial isoform 2 [Mus musculus]                               | 66  |
| 536.1 | GI:6755358   | Rpl8      | NP_036183.1    | <u>5</u>  | <u>0.32</u> | <u>4</u>  | <b>5</b>  | <u>4</u>  | <u>4</u>  | 60S ribosomal protein L8 [Mus musculus]                                                          | 28  |
| 537.1 | GI:6755252   | Purb      | NP_035351.1    | <u>5</u>  | <u>0.32</u> | <u>4</u>  | <b>5</b>  | <u>4</u>  | <u>4</u>  | transcriptional activator protein Pur-beta [Mus musculus]                                        | 34  |
| 555.1 | GI:27228985  | Ndufa12   | NP_079827.2    | <u>5</u>  | <u>0.32</u> | <u>5</u>  | <b>5</b>  | <u>4</u>  | <u>4</u>  | NADH dehydrogenase [ubiquinone] 1 alpha subcomplex subunit 12 [Mus musculus]                     | 18  |
| 613.1 | GI:94408110  | Gm7429    | XP_978816.1    | <u>5</u>  | <u>0.32</u> | <u>4</u>  | <b>5</b>  | <u>4</u>  | <u>4</u>  | PREDICTED: 60S ribosomal protein L30-like [Mus musculus]                                         | 13  |
| 616.1 | GI:7304993   | Dbnl      | NP_038838.1    | <u>5</u>  | <u>0.32</u> | <u>5</u>  | <b>5</b>  | <u>4</u>  | <u>4</u>  | drebrin-like protein isoform 2 [Mus musculus]                                                    | 48  |
| 628.1 | GI:359279952 | Gpm6a     | NP_001240685.1 | <u>5</u>  | <u>0.32</u> | <u>5</u>  | <b>5</b>  | <u>3</u>  | <u>4</u>  | neuronal membrane glycoprotein M6-a isoform 3 [Mus musculus]                                     | 20  |
| 788.1 | GI:13195690  | Rps27a    | NP_077239.1    | <u>4</u>  | <u>0.32</u> | <u>4</u>  | <b>5</b>  | <u>4</u>  | <u>4</u>  | ubiquitin-40S ribosomal protein S27a precursor [Mus musculus]                                    | 18  |
| 25.1  | GI:527498272 | Syngap1   | NP_001268420.1 | <u>32</u> | <u>0.33</u> | <u>25</u> | <b>29</b> | <u>21</u> | <u>23</u> | ras/Rap GTPase-activating protein SynGAP [Mus musculus]                                          | 148 |
| 190.1 | GI:7305443   | Rpl7a     | NP_038749.1    | <u>12</u> | <u>0.35</u> | <u>11</u> | <b>14</b> | <u>8</u>  | <u>11</u> | 60S ribosomal protein L7a [Mus musculus]                                                         | 30  |
| 81.2  | GI:113195686 | Lmnb2     | NP_034852.2    | <u>13</u> | <u>0.36</u> | <u>9</u>  | <b>9</b>  | <u>6</u>  | <u>7</u>  | lamin-B2 [Mus musculus]                                                                          | 67  |
| 86.1  | GI:161016786 | Ppfia3    | NP_084017.2    | <u>18</u> | <u>0.36</u> | <u>14</u> | <b>18</b> | <u>13</u> | <u>14</u> | liprin-alpha-3 [Mus musculus]                                                                    | 133 |
| 92.1  | GI:23956214  | Sfpq      | NP_076092.1    | <u>17</u> | <u>0.36</u> | <u>16</u> | <b>18</b> | <u>12</u> | <u>14</u> | splicing factor, proline- and glutamine-rich [Mus musculus]                                      | 75  |
| 167.4 | GI:42415473  | Ppp3ca    | NP_032939.1    | <u>9</u>  | <u>0.36</u> | <u>8</u>  | <b>9</b>  | <u>7</u>  | <u>7</u>  | serine/threonine-protein phosphatase 2B catalytic subunit alpha isoform [Mus musculus]           | 59  |
| 247.1 | GI:6678674   | Ldhb      | NP_032518.1    | <u>10</u> | <u>0.36</u> | <u>9</u>  | <b>9</b>  | <u>7</u>  | <u>7</u>  | L-lactate dehydrogenase B chain [Mus musculus]                                                   | 37  |
| 288.1 | GI:6754084   | Gstm1     | NP_034488.1    | <u>9</u>  | <u>0.36</u> | <u>9</u>  | <b>9</b>  | <u>7</u>  | <u>7</u>  | glutathione S-transferase Mu 1 [Mus musculus]                                                    | 26  |
| 76.1  | GI:261823961 | Myo6      | NP_001034635.2 | <u>19</u> | <u>0.38</u> | <u>12</u> | <b>13</b> | <u>10</u> | <u>10</u> | unconventional myosin-VI [Mus musculus]                                                          | 146 |
| 115.1 | GI:6753234   | Cacna2d1  | NP_033914.1    | <u>16</u> | <u>0.38</u> | <u>13</u> | <b>13</b> | <u>10</u> | <u>10</u> | voltage-dependent calcium channel subunit alpha-2/delta-1 isoform e preproprotein [Mus musculus] | 122 |
| 262.2 | GI:498752597 | Hbb-b1    | NP_001265090.1 | <u>8</u>  | <u>0.38</u> | <u>8</u>  | <b>13</b> | <u>7</u>  | <u>10</u> | hemoglobin subunit beta-1 [Mus musculus]                                                         | 16  |
| 14.1  | GI:116063570 | Dnm1      | NP_034195.2    | <u>37</u> | <u>0.38</u> | <u>30</u> | <b>43</b> | <u>29</u> | <u>33</u> | dynamin-1 [Mus musculus]                                                                         | 97  |



|       |              |              |                |           |             |           |           |           |           |                                                                                   |     |
|-------|--------------|--------------|----------------|-----------|-------------|-----------|-----------|-----------|-----------|-----------------------------------------------------------------------------------|-----|
| 49.1  | GI:291327470 | Itp1         | NP_034715.3    | <u>23</u> | <u>0.39</u> | <u>17</u> | <b>17</b> | <u>13</u> | <b>13</b> | inositol 1,4,5-trisphosphate receptor type 1 [Mus musculus]                       | 313 |
| 64.1  | GI:226423909 | Cnp          | NP_001139790.1 | <u>21</u> | <u>0.40</u> | <u>16</u> | <b>25</b> | <u>16</u> | <b>19</b> | 2',3'-cyclic-nucleotide 3'-phosphodiesterase isoform 1 [Mus musculus]             | 45  |
| 16.17 | GI:9910294   | Krt71        | NP_064340.1    | <u>4</u>  | <u>0.42</u> | <u>3</u>  | <b>4</b>  | <u>3</u>  | <b>3</b>  | keratin, type II cytoskeletal 71 [Mus musculus]                                   | 57  |
| 35.4  | GI:224809300 | Tubal3       | NP_001029051.2 | <u>4</u>  | <u>0.42</u> | <u>3</u>  | <b>4</b>  | <u>2</u>  | <b>3</b>  | tubulin alpha chain-like 3 [Mus musculus]                                         | 50  |
| 48.1  | GI:327315370 | Sorbs2       | NP_766340.4    | <u>24</u> | <u>0.42</u> | <u>17</u> | <b>20</b> | <u>14</u> | <b>15</b> | sorbin and SH3 domain-containing protein 2 isoform 2 [Mus musculus]               | 134 |
| 48.2  | GI:78000154  | Sorbs1       | NP_001030136.1 | <u>7</u>  | <u>0.42</u> | <u>6</u>  | <b>8</b>  | <u>6</u>  | <b>6</b>  | sorbin and SH3 domain-containing protein 1 isoform 5 [Mus musculus]               | 83  |
| 73.2  | GI:124487483 | Ogdhl        | NP_001074599.1 | <u>17</u> | <u>0.42</u> | <u>11</u> | <b>12</b> | <u>9</u>  | <b>9</b>  | 2-oxoglutarate dehydrogenase-like, mitochondrial [Mus musculus]                   | 117 |
| 90.1  | GI:33859482  | Eef2         | NP_031933.1    | <u>17</u> | <u>0.42</u> | <u>16</u> | <b>16</b> | <u>12</u> | <b>12</b> | elongation factor 2 [Mus musculus]                                                | 95  |
| 116.1 | GI:60592782  | Rims1        | NP_001012641.1 | <u>16</u> | <u>0.42</u> | <u>11</u> | <b>12</b> | <u>9</u>  | <b>9</b>  | regulating synaptic membrane exocytosis protein 1 isoform 3 [Mus musculus]        | 153 |
| 139.3 | GI:164419753 | Gria4        | NP_001106651.1 | <u>5</u>  | <u>0.42</u> | <u>3</u>  | <b>4</b>  | <u>3</u>  | <b>3</b>  | glutamate receptor 4 isoform 2 precursor [Mus musculus]                           | 101 |
| 154.4 | GI:31543974  | Ywhab        | NP_061223.2    | <u>12</u> | <u>0.42</u> | <u>7</u>  | <b>8</b>  | <u>6</u>  | <b>6</b>  | 14-3-3 protein beta/alpha [Mus musculus]                                          | 28  |
| 194.1 | GI:9790087   | Rapgef4      | NP_062662.1    | <u>12</u> | <u>0.42</u> | <u>7</u>  | <b>8</b>  | <u>6</u>  | <b>6</b>  | rap guanine nucleotide exchange factor 4 isoform 2 [Mus musculus]                 | 113 |
| 224.2 | GI:124487071 | Dgki         | NP_001074675.1 | <u>8</u>  | <u>0.42</u> | <u>6</u>  | <b>8</b>  | <u>6</u>  | <b>6</b>  | diacylglycerol kinase iota [Mus musculus]                                         | 118 |
| 312.1 | GI:6679573   | Pura         | NP_033015.1    | <u>8</u>  | <u>0.42</u> | <u>7</u>  | <b>8</b>  | <u>5</u>  | <b>6</b>  | transcriptional activator protein Pur-alpha [Mus musculus]                        | 35  |
| 321.1 | GI:29789343  | Eif3b        | NP_598677.1    | <u>8</u>  | <u>0.42</u> | <u>4</u>  | <b>4</b>  | <u>3</u>  | <b>3</b>  | eukaryotic translation initiation factor 3 subunit B [Mus musculus]               | 91  |
| 349.2 | GI:7106303   | Ehd1         | NP_034249.1    | <u>5</u>  | <u>0.42</u> | <u>4</u>  | <b>4</b>  | <u>3</u>  | <b>3</b>  | EH domain-containing protein 1 [Mus musculus]                                     | 61  |
| 361.1 | GI:407261592 | LOC100046151 | XP_003946312.1 | <u>8</u>  | <u>0.42</u> | <u>8</u>  | <b>8</b>  | <u>5</u>  | <b>6</b>  | PREDICTED: phosphate carrier protein, mitochondrial-like isoform 2 [Mus musculus] | 40  |
| 364.1 | GI:329664963 | Actr3        | NP_001192314.1 | <u>8</u>  | <u>0.42</u> | <u>8</u>  | <b>8</b>  | <u>6</u>  | <b>6</b>  | actin-related protein 3 [Mus musculus]                                            | 47  |
| 367.1 | GI:30089708  | Hist1h4n     | NP_783588.1    | <u>8</u>  | <u>0.42</u> | <u>7</u>  | <b>12</b> | <u>6</u>  | <b>9</b>  | histone H4 [Mus musculus]                                                         | 11  |
| 380.1 | GI:6755114   | Prdx5        | NP_036151.1    | <u>7</u>  | <u>0.42</u> | <u>6</u>  | <b>8</b>  | <u>6</u>  | <b>6</b>  | peroxiredoxin-5, mitochondrial precursor [Mus musculus]                           | 22  |
| 417.2 | GI:22550094  | Prkar2a      | NP_032950.1    | <u>4</u>  | <u>0.42</u> | <u>4</u>  | <b>4</b>  | <u>3</u>  | <b>3</b>  | cAMP-dependent protein kinase type II-alpha regulatory subunit [Mus musculus]     | 46  |
| 437.1 | GI:269973897 | Arhgap39     | NP_001161760.1 | <u>7</u>  | <u>0.42</u> | <u>4</u>  | <b>4</b>  | <u>3</u>  | <b>3</b>  | rho GTPase-activating protein 39 isoform 1 [Mus musculus]                         | 125 |
| 441.1 | GI:170784813 | Upf1         | NP_001116301.1 | <u>7</u>  | <u>0.42</u> | <u>4</u>  | <b>4</b>  | <u>3</u>  | <b>3</b>  | regulator of nonsense transcripts 1 isoform a [Mus musculus]                      | 124 |
| 492.1 | GI:23510241  | Pde4d        | NP_035186.1    | <u>6</u>  | <u>0.42</u> | <u>4</u>  | <b>4</b>  | <u>3</u>  | <b>3</b>  | cAMP-specific 3',5'-cyclic phosphodiesterase 4D [Mus musculus]                    | 85  |
| 507.2 | GI:13470090  | Rab3c        | NP_076341.1    | <u>5</u>  | <u>0.42</u> | <u>4</u>  | <b>4</b>  | <u>2</u>  | <b>3</b>  | ras-related protein Rab-3C [Mus musculus]                                         | 26  |
| 520.1 | GI:165932379 | Serbp1       | NP_001107037.1 | <u>6</u>  | <u>0.42</u> | <u>4</u>  | <b>4</b>  | <u>3</u>  | <b>3</b>  | plasminogen activator inhibitor 1 RNA-binding protein isoform 3 [Mus musculus]    | 43  |
| 538.1 | GI:6753936   | Gabra1       | NP_034380.1    | <u>5</u>  | <u>0.42</u> | <u>4</u>  | <b>4</b>  | <u>3</u>  | <b>3</b>  | gamma-aminobutyric acid receptor subunit alpha-1 precursor [Mus musculus]         | 52  |
| 564.1 | GI:22122643  | Itpka        | NP_666237.1    | <u>5</u>  | <u>0.42</u> | <u>4</u>  | <b>4</b>  | <u>3</u>  | <b>3</b>  | inositol-trisphosphate 3-kinase A [Mus musculus]                                  | 51  |
| 580.1 | GI:157278453 | Rapgef2      | NP_001093094.2 | <u>5</u>  | <u>0.42</u> | <u>4</u>  | <b>4</b>  | <u>3</u>  | <b>3</b>  | rap guanine nucleotide exchange factor 2 [Mus musculus]                           | 166 |
| 589.1 | GI:124486712 | Rrbp1        | NP_077243.2    | <u>5</u>  | <u>0.42</u> | <u>4</u>  | <b>4</b>  | <u>3</u>  | <b>3</b>  | ribosome-binding protein 1 isoform a [Mus musculus]                               | 158 |

|        |              |              |                |           |             |          |           |           |           |                                                                               |     |
|--------|--------------|--------------|----------------|-----------|-------------|----------|-----------|-----------|-----------|-------------------------------------------------------------------------------|-----|
| 595.2  | GI:34098931  | Calb2        | NP_031612.1    | <u>4</u>  | <u>0.42</u> | <u>4</u> | <b>4</b>  | <u>3</u>  | <b>3</b>  | calretinin [Mus musculus]                                                     | 31  |
| 596.1  | GI:40254600  | Anp32a       | NP_033802.2    | <u>5</u>  | <u>0.42</u> | <u>4</u> | <b>4</b>  | <u>3</u>  | <b>3</b>  | acidic leucine-rich nuclear phosphoprotein 32 family member A [Mus musculus]  | 29  |
| 601.1  | GI:356995868 | Ddx39b       | NP_001239386.1 | <u>5</u>  | <u>0.42</u> | <u>3</u> | <b>4</b>  | <u>3</u>  | <b>3</b>  | spliceosome RNA helicase Ddx39b [Mus musculus]                                | 49  |
| 620.1  | GI:6677779   | Rpl28        | NP_033107.1    | <u>5</u>  | <u>0.42</u> | <u>4</u> | <b>4</b>  | <u>3</u>  | <b>3</b>  | 60S ribosomal protein L28 [Mus musculus]                                      | 16  |
| 622.1  | GI:56699438  | Eef1d        | NP_083939.1    | <u>5</u>  | <u>0.42</u> | <u>4</u> | <b>4</b>  | <u>3</u>  | <b>3</b>  | elongation factor 1-delta isoform a [Mus musculus]                            | 73  |
| 623.1  | GI:56699434  | Eif4g1       | NP_001005331.1 | <u>5</u>  | <u>0.42</u> | <u>4</u> | <b>4</b>  | <u>3</u>  | <b>3</b>  | eukaryotic translation initiation factor 4 gamma 1 isoform b [Mus musculus]   | 175 |
| 636.1  | GI:224922806 | Gpd2         | NP_001139292.1 | <u>5</u>  | <u>0.42</u> | <u>4</u> | <b>4</b>  | <u>3</u>  | <b>3</b>  | glycerol-3-phosphate dehydrogenase, mitochondrial precursor [Mus musculus]    | 81  |
| 648.1  | GI:84794552  | Pebp1        | NP_061346.2    | <u>4</u>  | <u>0.42</u> | <u>4</u> | <b>4</b>  | <u>2</u>  | <b>3</b>  | phosphatidylethanolamine-binding protein 1 [Mus musculus]                     | 21  |
| 657.1  | GI:6755364   | Sub1         | NP_035424.1    | <u>4</u>  | <u>0.42</u> | <u>3</u> | <b>4</b>  | <u>3</u>  | <b>3</b>  | activated RNA polymerase II transcriptional coactivator p15 [Mus musculus]    | 14  |
| 670.1  | GI:55741460  | Park7        | NP_065594.2    | <u>4</u>  | <u>0.42</u> | <u>4</u> | <b>4</b>  | <u>3</u>  | <b>3</b>  | protein DJ-1 [Mus musculus]                                                   | 20  |
| 672.1  | GI:51092272  | Opcml        | NP_808574.2    | <u>4</u>  | <u>0.42</u> | <u>4</u> | <b>4</b>  | <u>3</u>  | <b>3</b>  | opioid-binding protein/cell adhesion molecule precursor [Mus musculus]        | 37  |
| 707.1  | GI:189339262 | Atp6v1c1     | NP_079770.2    | <u>4</u>  | <u>0.42</u> | <u>4</u> | <b>4</b>  | <u>3</u>  | <b>3</b>  | V-type proton ATPase subunit C 1 [Mus musculus]                               | 44  |
| 709.1  | GI:166235165 | Syp          | NP_033331.2    | <u>4</u>  | <u>0.42</u> | <u>4</u> | <b>4</b>  | <u>3</u>  | <b>3</b>  | synaptophysin [Mus musculus]                                                  | 34  |
| 717.1  | GI:12963511  | Rps19        | NP_075622.1    | <u>4</u>  | <u>0.42</u> | <u>4</u> | <b>4</b>  | <u>3</u>  | <b>3</b>  | 40S ribosomal protein S19 [Mus musculus]                                      | 16  |
| 731.1  | GI:6753324   | Cct6a        | NP_033968.1    | <u>4</u>  | <u>0.42</u> | <u>4</u> | <b>4</b>  | <u>3</u>  | <b>3</b>  | T-complex protein 1 subunit zeta [Mus musculus]                               | 58  |
| 762.1  | GI:7242148   | Eif2s3y      | NP_036141.1    | <u>4</u>  | <u>0.42</u> | <u>4</u> | <b>4</b>  | <u>2</u>  | <b>3</b>  | eukaryotic translation initiation factor 2 subunit 3, Y-linked [Mus musculus] | 51  |
| 781.1  | GI:262359898 | Eif5a        | NP_001160067.1 | <u>4</u>  | <u>0.42</u> | <u>4</u> | <b>4</b>  | <u>2</u>  | <b>3</b>  | eukaryotic translation initiation factor 5A-1 [Mus musculus]                  | 17  |
| 820.1  | GI:58037109  | Ndufb10      | NP_080960.1    | <u>3</u>  | <u>0.42</u> | <u>3</u> | <b>4</b>  | <u>3</u>  | <b>3</b>  | NADH dehydrogenase [ubiquinone] 1 beta subcomplex subunit 10 [Mus musculus]   | 21  |
| 847.1  | GI:226874869 | Omg          | NP_062282.2    | <u>3</u>  | <u>0.42</u> | <u>3</u> | <b>4</b>  | <u>3</u>  | <b>3</b>  | oligodendrocyte-myelin glycoprotein precursor [Mus musculus]                  | 50  |
| 856.1  | GI:21539585  | Uqcrq        | NP_079628.1    | <u>3</u>  | <u>0.42</u> | <u>3</u> | <b>4</b>  | <u>2</u>  | <b>3</b>  | cytochrome b-c1 complex subunit 8 [Mus musculus]                              | 10  |
| 974.1  | GI:225690618 | Acot7        | NP_001139530.1 | <u>3</u>  | <u>0.42</u> | <u>3</u> | <b>4</b>  | <u>2</u>  | <b>3</b>  | cytosolic acyl coenzyme A thioester hydrolase isoform 3 [Mus musculus]        | 39  |
| 1068.1 | GI:31980744  | Atp5l        | NP_038823.2    | <u>2</u>  | <u>0.42</u> | <u>2</u> | <b>4</b>  | <u>2</u>  | <b>3</b>  | ATP synthase subunit g, mitochondrial [Mus musculus]                          | 11  |
| 1250.1 | GI:6678193   | Syng1        | NP_033329.1    | <u>2</u>  | <u>0.42</u> | <u>2</u> | <b>4</b>  | <u>2</u>  | <b>3</b>  | synaptogyrin-1 isoform 1b [Mus musculus]                                      | 21  |
| 1266.1 | GI:309267203 | LOC100505154 | XP_003086989.1 | <u>2</u>  | <u>0.42</u> | <u>1</u> | <b>4</b>  | <u>2</u>  | <b>3</b>  | PREDICTED: keratin, type II cytoskeletal 78-like, partial [Mus musculus]      | 56  |
| 56.1   | GI:71896543  | Shank3       | NP_067398.2    | <u>21</u> | <u>0.45</u> | 14       | <b>15</b> | <u>11</u> | <b>11</b> | SH3 and multiple ankyrin repeat domains protein 3 [Mus musculus]              | 185 |
| 99.1   | GI:552953687 | Trim3        | NP_001272802.1 | <u>17</u> | <u>0.45</u> | 15       | <b>15</b> | <u>11</u> | <b>11</b> | tripartite motif-containing protein 3 isoform b [Mus musculus]                | 78  |
| 101.1  | GI:31982273  | Hsd17b4      | NP_032318.2    | <u>16</u> | <u>0.45</u> | 15       | <b>15</b> | <u>11</u> | <b>11</b> | peroxisomal multifunctional enzyme type 2 [Mus musculus]                      | 79  |
| 191.1  | GI:255308899 | Rpl3         | NP_038790.2    | <u>12</u> | <u>0.45</u> | 10       | <b>15</b> | <u>10</u> | <b>11</b> | 60S ribosomal protein L3 [Mus musculus]                                       | 46  |
| 262.1  | GI:319402143 | Hbb-bs       | NP_001188320.1 | <u>10</u> | <u>0.45</u> | 9        | <b>15</b> | <u>7</u>  | <b>11</b> | hemoglobin, beta adult s chain [Mus musculus]                                 | 16  |
| 154.1  | GI:359385698 | Ywhaz        | NP_001240735.1 | <u>14</u> | <u>0.46</u> | 8        | <b>11</b> | <u>8</u>  | <b>8</b>  | 14-3-3 protein zeta/delta isoform 1 [Mus musculus]                            | 28  |

|       |              |               |                |           |             |           |           |           |           |                                                                           |     |
|-------|--------------|---------------|----------------|-----------|-------------|-----------|-----------|-----------|-----------|---------------------------------------------------------------------------|-----|
| 175.1 | GI:157057174 | Ablim1        | NP_001096647.1 | <u>13</u> | <u>0.46</u> | <u>10</u> | <b>11</b> | <u>8</u>  | <b>8</b>  | actin-binding LIM protein 1 isoform 2 [Mus musculus]                      | 79  |
| 192.1 | GI:6680095   | Grin1         | NP_032195.1    | <u>12</u> | <u>0.46</u> | <u>11</u> | <b>11</b> | <u>6</u>  | <b>8</b>  | glutamate receptor ionotropic, NMDA 1 isoform 1 precursor [Mus musculus]  | 105 |
| 224.1 | GI:262205333 | Dgkz          | NP_001160069.1 | <u>11</u> | <u>0.46</u> | <u>9</u>  | <b>11</b> | <u>8</u>  | <b>8</b>  | diacylglycerol kinase zeta isoform 1 [Mus musculus]                       | 125 |
| 237.1 | GI:226958349 | Tpi1          | NP_033441.2    | <u>10</u> | <u>0.46</u> | <u>10</u> | <b>11</b> | <u>7</u>  | <b>8</b>  | triosephosphate isomerase [Mus musculus]                                  | 32  |
| 63.1  | GI:6752954   | Actg1         | NP_033739.1    | <u>21</u> | <u>0.47</u> | <u>19</u> | <b>54</b> | <u>14</u> | <b>39</b> | actin, cytoplasmic 2 [Mus musculus]                                       | 42  |
| 108.1 | GI:7305027   | Eno2          | NP_038537.1    | <u>16</u> | <u>0.47</u> | <u>14</u> | <b>18</b> | <u>10</u> | <b>13</b> | gamma-enolase [Mus musculus]                                              | 47  |
| 110.1 | GI:293651556 | Dbn1          | NP_001170842.1 | <u>16</u> | <u>0.47</u> | <u>13</u> | <b>18</b> | <u>10</u> | <b>13</b> | drebrin isoform 1 [Mus musculus]                                          | 77  |
| 29.2  | GI:161168987 | Syn2          | NP_001104485.1 | <u>17</u> | <u>0.47</u> | <u>14</u> | <b>25</b> | <u>14</u> | <b>18</b> | synapsin-2 isoform IIa [Mus musculus]                                     | 63  |
| 132.1 | GI:19705578  | Atp6v1b2      | NP_031535.2    | <u>15</u> | <u>0.49</u> | <u>13</u> | <b>14</b> | <u>10</u> | <b>10</b> | V-type proton ATPase subunit B, brain isoform [Mus musculus]              | 57  |
| 244.1 | GI:124486684 | Trappc10      | NP_001074524.1 | <u>10</u> | <u>0.49</u> | <u>7</u>  | <b>7</b>  | <u>5</u>  | <b>5</b>  | trafficking protein particle complex subunit 10 [Mus musculus]            | 141 |
| 314.1 | GI:54291704  | Pacs1         | NP_694769.2    | <u>8</u>  | <u>0.49</u> | <u>7</u>  | <b>7</b>  | <u>5</u>  | <b>5</b>  | phosphofurin acidic cluster sorting protein 1 [Mus musculus]              | 105 |
| 330.1 | GI:16716465  | Acsbg1        | NP_444408.1    | <u>8</u>  | <u>0.49</u> | <u>6</u>  | <b>7</b>  | <u>4</u>  | <b>5</b>  | long-chain-fatty-acid-CoA ligase ACSBG1 [Mus musculus]                    | 80  |
| 387.1 | GI:254675126 | 2010300C02Rik | NP_082372.1    | <u>7</u>  | <u>0.49</u> | <u>6</u>  | <b>7</b>  | <u>4</u>  | <b>5</b>  | uncharacterized protein LOC72097 [Mus musculus]                           | 126 |
| 410.1 | GI:112293264 | Pdia3         | NP_031978.2    | <u>7</u>  | <u>0.49</u> | <u>7</u>  | <b>7</b>  | <u>5</u>  | <b>5</b>  | protein disulfide-isomerase A3 precursor [Mus musculus]                   | 57  |
| 418.1 | GI:45504359  | Atp6v1e1      | NP_031536.2    | <u>7</u>  | <u>0.49</u> | <u>6</u>  | <b>7</b>  | <u>5</u>  | <b>5</b>  | V-type proton ATPase subunit E 1 [Mus musculus]                           | 26  |
| 606.1 | GI:6755368   | Rps18         | NP_035426.1    | <u>5</u>  | <u>0.49</u> | <u>4</u>  | <b>7</b>  | <u>5</u>  | <b>5</b>  | 40S ribosomal protein S18 [Mus musculus]                                  | 18  |
| 181.1 | GI:31982186  | Mdh2          | NP_032643.2    | <u>12</u> | <u>0.50</u> | <u>12</u> | <b>17</b> | <u>11</u> | <b>12</b> | malate dehydrogenase, mitochondrial precursor [Mus musculus]              | 36  |
| 133.2 | GI:6755256   | Pygm          | NP_035354.1    | <u>13</u> | <u>0.51</u> | <u>10</u> | <b>10</b> | <u>7</u>  | <b>7</b>  | glycogen phosphorylase, muscle form [Mus musculus]                        | 97  |
| 268.1 | GI:6677805   | Rps4x         | NP_033120.1    | <u>9</u>  | <u>0.51</u> | <u>9</u>  | <b>10</b> | <u>6</u>  | <b>7</b>  | 40S ribosomal protein S4, X isoform [Mus musculus]                        | 30  |
| 658.1 | GI:6753220   | C1qb          | NP_033907.1    | <u>4</u>  | <u>0.51</u> | <u>3</u>  | <b>10</b> | <u>4</u>  | <b>7</b>  | complement C1q subcomponent subunit B precursor [Mus musculus]            | 27  |
| 117.1 | GI:281604100 | Sbf1          | NP_001164032.1 | <u>16</u> | <u>0.53</u> | <u>12</u> | <b>13</b> | <u>8</u>  | <b>9</b>  | myotubularin-related protein 5 isoform 1 [Mus musculus]                   | 211 |
| 55.1  | GI:340007379 | Atp6v0a1      | NP_001229980.1 | <u>22</u> | <u>0.54</u> | <u>20</u> | <b>29</b> | <u>13</u> | <b>20</b> | V-type proton ATPase 116 kDa subunit a isoform 1 isoform 4 [Mus musculus] | 96  |
| 3.5   | GI:116174793 | Sptbn4        | NP_115999.2    | <u>37</u> | <u>0.54</u> | <u>30</u> | <b>32</b> | <u>20</u> | <b>22</b> | spectrin beta 4 isoform sigma1 [Mus musculus]                             | 289 |
| 140.1 | GI:6679937   | Gapdh         | NP_032110.1    | <u>15</u> | <u>0.54</u> | <u>15</u> | <b>32</b> | <u>11</u> | <b>22</b> | glyceraldehyde-3-phosphate dehydrogenase [Mus musculus]                   | 36  |
| 63.2  | GI:30425250  | Actbl2        | NP_780706.1    | <u>8</u>  | <u>0.55</u> | <u>6</u>  | <b>22</b> | <u>5</u>  | <b>15</b> | beta-actin-like protein 2 [Mus musculus]                                  | 42  |
| 47.1  | GI:70608131  | Immt          | NP_083949.2    | <u>24</u> | <u>0.56</u> | <u>22</u> | <b>28</b> | <u>16</u> | <b>19</b> | mitochondrial inner membrane protein isoform 1 [Mus musculus]             | 84  |
| 16.3  | GI:31982755  | Vim           | NP_035831.2    | <u>30</u> | <u>0.56</u> | <u>24</u> | <b>34</b> | <u>19</u> | <b>23</b> | vimentin [Mus musculus]                                                   | 54  |
| 31.3  | GI:188219524 | Dpysl4        | NP_036123.3    | <u>7</u>  | <u>0.58</u> | <u>6</u>  | <b>6</b>  | <u>4</u>  | <b>4</b>  | dihydropyrimidinase-related protein 4 [Mus musculus]                      | 62  |
| 40.1  | GI:359807367 | Pkm           | NP_001240812.1 | <u>26</u> | <u>0.58</u> | <u>23</u> | <b>30</b> | <u>18</u> | <b>20</b> | pyruvate kinase, muscle isoform M1 [Mus musculus]                         | 58  |
| 44.2  | GI:6753294   | Ctnna1        | NP_033948.1    | <u>7</u>  | <u>0.58</u> | <u>6</u>  | <b>6</b>  | <u>4</u>  | <b>4</b>  | catenin alpha-1 [Mus musculus]                                            | 100 |
| 53.3  | GI:40254635  | Kif5a         | NP_032473.2    | <u>10</u> | <u>0.58</u> | <u>9</u>  | <b>9</b>  | <u>6</u>  | <b>6</b>  | kinesin heavy chain isoform 5A [Mus musculus]                             | 117 |

|       |              |               |                |           |             |           |           |           |           |                                                                                                       |     |
|-------|--------------|---------------|----------------|-----------|-------------|-----------|-----------|-----------|-----------|-------------------------------------------------------------------------------------------------------|-----|
| 61.2  | GI:167900460 | Iqsec2        | NP_001108136.1 | <u>13</u> | <u>0.58</u> | <u>12</u> | <b>12</b> | <u>8</u>  | <b>8</b>  | IQ motif and SEC7 domain-containing protein 2 isoform 1 [Mus musculus]                                | 162 |
| 108.2 | GI:158853992 | Eno1          | NP_075608.2    | <u>16</u> | <u>0.58</u> | <u>14</u> | <b>24</b> | <u>11</u> | <b>16</b> | alpha-enolase [Mus musculus]                                                                          | 47  |
| 167.3 | GI:161484668 | Ppp1cb        | NP_766295.2    | <u>11</u> | <u>0.58</u> | <u>11</u> | <b>12</b> | <u>7</u>  | <b>8</b>  | serine/threonine-protein phosphatase PP1-beta catalytic subunit [Mus musculus]                        | 37  |
| 168.3 | GI:309271474 | Pabpc112 b-ps | XP_003085306.1 | <u>2</u>  | <u>0.58</u> | <u>2</u>  | <b>3</b>  | <u>1</u>  | <b>2</b>  | PREDICTED: polyadenylate-binding protein 1-like 2-like [Mus musculus]                                 | 26  |
| 215.1 | GI:84370347  | Mapt          | NP_001033698.1 | <u>11</u> | <u>0.58</u> | <u>11</u> | <b>12</b> | <u>7</u>  | <b>8</b>  | microtubule-associated protein tau isoform a [Mus musculus]                                           | 45  |
| 222.2 | GI:57634518  | Sept11        | NP_001009818.1 | <u>8</u>  | <u>0.58</u> | <u>6</u>  | <b>6</b>  | <u>4</u>  | <b>4</b>  | septin-11 [Mus musculus]                                                                              | 49  |
| 291.2 | GI:15809030  | Sncb          | NP_291088.1    | <u>7</u>  | <u>0.58</u> | <u>6</u>  | <b>9</b>  | <u>3</u>  | <b>6</b>  | beta-synuclein [Mus musculus]                                                                         | 14  |
| 303.1 | GI:306922354 | Dclk2         | NP_001182428.1 | <u>9</u>  | <u>0.58</u> | <u>6</u>  | <b>6</b>  | <u>4</u>  | <b>4</b>  | serine/threonine-protein kinase DCLK2 isoform 5 [Mus musculus]                                        | 78  |
| 344.2 | GI:112293266 | Hspa4         | NP_032326.3    | <u>7</u>  | <u>0.58</u> | <u>6</u>  | <b>6</b>  | <u>3</u>  | <b>4</b>  | heat shock 70 kDa protein 4 [Mus musculus]                                                            | 94  |
| 372.1 | GI:20070412  | Atp5o         | NP_613063.1    | <u>8</u>  | <u>0.58</u> | <u>7</u>  | <b>9</b>  | <u>5</u>  | <b>6</b>  | ATP synthase subunit O, mitochondrial precursor [Mus musculus]                                        | 23  |
| 385.1 | GI:31982233  | Mtdh          | NP_080278.3    | <u>7</u>  | <u>0.58</u> | <u>6</u>  | <b>6</b>  | <u>4</u>  | <b>4</b>  | protein LYRIC [Mus musculus]                                                                          | 64  |
| 392.1 | GI:21704100  | Hadhb         | NP_663533.1    | <u>7</u>  | <u>0.58</u> | <u>6</u>  | <b>6</b>  | <u>4</u>  | <b>4</b>  | trifunctional enzyme subunit beta, mitochondrial precursor [Mus musculus]                             | 51  |
| 405.1 | GI:124286805 | C1qa          | NP_031598.2    | <u>7</u>  | <u>0.58</u> | <u>7</u>  | <b>9</b>  | <u>5</u>  | <b>6</b>  | complement C1q subcomponent subunit A precursor [Mus musculus]                                        | 26  |
| 414.1 | GI:31542413  | Coro1c        | NP_035909.2    | <u>7</u>  | <u>0.58</u> | <u>6</u>  | <b>6</b>  | <u>4</u>  | <b>4</b>  | coronin-1C [Mus musculus]                                                                             | 53  |
| 446.1 | GI:88014720  | Kpnb1         | NP_032405.3    | <u>6</u>  | <u>0.58</u> | <u>3</u>  | <b>3</b>  | <u>2</u>  | <b>2</b>  | importin subunit beta-1 [Mus musculus]                                                                | 97  |
| 456.1 | GI:58037465  | Rpl18a        | NP_084027.1    | <u>6</u>  | <u>0.58</u> | <u>4</u>  | <b>6</b>  | <u>3</u>  | <b>4</b>  | 60S ribosomal protein L18a [Mus musculus]                                                             | 21  |
| 460.1 | GI:38348480  | Dlgap3        | NP_941020.1    | <u>6</u>  | <u>0.58</u> | <u>5</u>  | <b>6</b>  | <u>4</u>  | <b>4</b>  | disks large-associated protein 3 [Mus musculus]                                                       | 106 |
| 479.1 | GI:13195624  | Ndufa10       | NP_077159.1    | <u>6</u>  | <u>0.58</u> | <u>5</u>  | <b>6</b>  | <u>4</u>  | <b>4</b>  | NADH dehydrogenase [ubiquinone] 1 alpha subcomplex subunit 10, mitochondrial precursor [Mus musculus] | 41  |
| 480.1 | GI:12963559  | Atp6v1g2      | NP_075668.1    | <u>6</u>  | <u>0.58</u> | <u>6</u>  | <b>9</b>  | <u>5</u>  | <b>6</b>  | V-type proton ATPase subunit G 2 [Mus musculus]                                                       | 14  |
| 484.1 | GI:112181302 | Rabl6         | NP_001019787.2 | <u>6</u>  | <u>0.58</u> | <u>6</u>  | <b>6</b>  | <u>4</u>  | <b>4</b>  | rab-like protein 6 [Mus musculus]                                                                     | 80  |
| 515.2 | GI:294345390 | Anks1b        | NP_001170868.1 | <u>5</u>  | <u>0.58</u> | <u>3</u>  | <b>3</b>  | <u>2</u>  | <b>2</b>  | ankyrin repeat and sterile alpha motif domain-containing protein 1B isoform 4 [Mus musculus]          | 45  |
| 534.1 | GI:6755983   | Vsnl1         | NP_036168.1    | <u>5</u>  | <u>0.58</u> | <u>5</u>  | <b>6</b>  | <u>4</u>  | <b>4</b>  | visinin-like protein 1 [Mus musculus]                                                                 | 22  |
| 554.1 | GI:281332195 | Mlf2          | NP_001163812.1 | <u>5</u>  | <u>0.58</u> | <u>5</u>  | <b>6</b>  | <u>3</u>  | <b>4</b>  | myeloid leukemia factor 2 [Mus musculus]                                                              | 28  |
| 583.1 | GI:13399310  | Rps10         | NP_080239.1    | <u>5</u>  | <u>0.58</u> | <u>5</u>  | <b>6</b>  | <u>3</u>  | <b>4</b>  | 40S ribosomal protein S10 [Mus musculus]                                                              | 19  |
| 641.1 | GI:126116587 | Inpp4a        | NP_084542.2    | <u>5</u>  | <u>0.58</u> | <u>3</u>  | <b>3</b>  | <u>2</u>  | <b>2</b>  | type I inositol 3,4-bisphosphate 4-phosphatase isoform 1 [Mus musculus]                               | 106 |
| 646.1 | GI:91982738  | Cttnbp2       | NP_525024.1    | <u>4</u>  | <u>0.58</u> | <u>3</u>  | <b>3</b>  | <u>2</u>  | <b>2</b>  | cortactin-binding protein 2 [Mus musculus]                                                            | 179 |
| 650.1 | GI:8394347   | Stk39         | NP_058562.1    | <u>4</u>  | <u>0.58</u> | <u>3</u>  | <b>3</b>  | <u>2</u>  | <b>2</b>  | STE20/SPS1-related proline-alanine-rich protein kinase [Mus musculus]                                 | 60  |
| 653.1 | GI:7304929   | Trappc3       | NP_038746.1    | <u>4</u>  | <u>0.58</u> | <u>3</u>  | <b>3</b>  | <u>2</u>  | <b>2</b>  | trafficking protein particle complex subunit 3 [Mus musculus]                                         | 20  |
| 661.1 | GI:6680345   | Idh3g         | NP_032349.1    | <u>4</u>  | <u>0.58</u> | <u>3</u>  | <b>3</b>  | <u>2</u>  | <b>2</b>  | isocitrate dehydrogenase [NAD] subunit gamma 1, mitochondrial precursor [Mus musculus]                | 43  |
| 664.1 | GI:6679339   | Pitpnm1       | NP_032877.1    | <u>4</u>  | <u>0.58</u> | <u>3</u>  | <b>3</b>  | <u>2</u>  | <b>2</b>  | membrane-associated phosphatidylinositol transfer protein 1 [Mus musculus]                            | 135 |

|       |              |                   |                |          |             |          |          |          |          |                                                                                                         |     |
|-------|--------------|-------------------|----------------|----------|-------------|----------|----------|----------|----------|---------------------------------------------------------------------------------------------------------|-----|
| 675.1 | GI:38371755  | Ddah1             | NP_081269.1    | <u>4</u> | <u>0.58</u> | <u>3</u> | <b>3</b> | <u>1</u> | <u>2</u> | N(G),N(G)-dimethylarginine dimethylaminohydrolase 1 [Mus musculus]                                      | 31  |
| 704.1 | GI:21314838  | Sh3glb2           | NP_647463.1    | <u>4</u> | <u>0.58</u> | <u>3</u> | <b>3</b> | <u>2</u> | <u>2</u> | endophilin-B2 [Mus musculus]                                                                            | 44  |
| 711.1 | GI:160333729 | Endod1            | NP_082289.2    | <u>4</u> | <u>0.58</u> | <u>3</u> | <b>3</b> | <u>2</u> | <u>2</u> | endonuclease domain-containing 1 protein precursor [Mus musculus]                                       | 55  |
| 716.1 | GI:13385554  | Cap2              | NP_080332.1    | <u>4</u> | <u>0.58</u> | <u>3</u> | <b>3</b> | <u>2</u> | <u>2</u> | adenylyl cyclase-associated protein 2 [Mus musculus]                                                    | 53  |
| 729.1 | GI:10946870  | Akr1a1            | NP_067448.1    | <u>4</u> | <u>0.58</u> | <u>3</u> | <b>3</b> | <u>2</u> | <u>2</u> | alcohol dehydrogenase [NADP(+)] [Mus musculus]                                                          | 37  |
| 736.1 | GI:270483722 | A830010<br>M20Rik | NP_001007575.2 | <u>4</u> | <u>0.58</u> | <u>3</u> | <b>3</b> | <u>2</u> | <u>2</u> | uncharacterized protein KIAA1107 isoform 1 [Mus musculus]                                               | 117 |
| 739.1 | GI:254750662 | Jakmip2           | NP_001157109.1 | <u>4</u> | <u>0.58</u> | <u>3</u> | <b>3</b> | <u>2</u> | <u>2</u> | janus kinase and microtubule interacting protein 2 [Mus musculus]                                       | 96  |
| 744.1 | GI:269954677 | Qars              | NP_598555.2    | <u>4</u> | <u>0.58</u> | <u>3</u> | <b>3</b> | <u>2</u> | <u>2</u> | glutaminyl-tRNA synthetase isoform 1 [Mus musculus]                                                     | 88  |
| 745.2 | GI:33859753  | Rap1b             | NP_077777.1    | <u>4</u> | <u>0.58</u> | <u>3</u> | <b>3</b> | <u>2</u> | <u>2</u> | ras-related protein Rap-1b precursor [Mus musculus]                                                     | 21  |
| 772.1 | GI:407264228 | LOC1010<br>56140  | XP_003945637.1 | <u>4</u> | <u>0.58</u> | <u>3</u> | <b>3</b> | <u>2</u> | <u>2</u> | PREDICTED: uncharacterized protein LOC101056140 [Mus musculus]                                          | 53  |
| 776.1 | GI:355390374 | Cacna1a           | NP_001238990.1 | <u>4</u> | <u>0.58</u> | <u>3</u> | <b>3</b> | <u>2</u> | <u>2</u> | voltage-dependent P/Q-type calcium channel subunit alpha-1A isoform 4 [Mus musculus]                    | 259 |
| 791.1 | GI:9789995   | Stmn1             | NP_062615.1    | <u>3</u> | <u>0.58</u> | <u>3</u> | <b>3</b> | <u>2</u> | <u>2</u> | stathmin [Mus musculus]                                                                                 | 17  |
| 792.1 | GI:9256519   | Rplp1             | NP_061341.1    | <u>3</u> | <u>0.58</u> | <u>3</u> | <b>3</b> | <u>2</u> | <u>2</u> | 60S acidic ribosomal protein P1 [Mus musculus]                                                          | 11  |
| 815.1 | GI:6678347   | Thy1              | NP_033408.1    | <u>3</u> | <u>0.58</u> | <u>3</u> | <b>3</b> | <u>2</u> | <u>2</u> | thy-1 membrane glycoprotein preproprotein [Mus musculus]                                                | 18  |
| 823.1 | GI:49258190  | Nckipsd           | NP_109654.2    | <u>3</u> | <u>0.58</u> | <u>3</u> | <b>3</b> | <u>2</u> | <u>2</u> | NCK-interacting protein with SH3 domain [Mus musculus]                                                  | 79  |
| 826.1 | GI:40254521  | Mob4              | NP_079559.2    | <u>3</u> | <u>0.58</u> | <u>3</u> | <b>3</b> | <u>2</u> | <u>2</u> | MOB-like protein phocein [Mus musculus]                                                                 | 26  |
| 833.1 | GI:31560541  | Syngn3            | NP_035652.2    | <u>3</u> | <u>0.58</u> | <u>3</u> | <b>3</b> | <u>2</u> | <u>2</u> | synaptogyrin-3 [Mus musculus]                                                                           | 25  |
| 860.1 | GI:21312654  | Arpc5l            | NP_083085.1    | <u>3</u> | <u>0.58</u> | <u>3</u> | <b>3</b> | <u>2</u> | <u>2</u> | actin-related protein 2/3 complex subunit 5-like protein [Mus musculus]                                 | 17  |
| 893.1 | GI:126012517 | Aimp1             | NP_031952.2    | <u>3</u> | <u>0.58</u> | <u>3</u> | <b>3</b> | <u>2</u> | <u>2</u> | aminoacyl tRNA synthase complex-interacting multifunctional protein 1 [Mus musculus]                    | 35  |
| 899.1 | GI:124378026 | Tanc2             | NP_851416.2    | <u>3</u> | <u>0.58</u> | <u>3</u> | <b>3</b> | <u>2</u> | <u>2</u> | protein TANC2 [Mus musculus]                                                                            | 220 |
| 901.1 | GI:124244037 | Cdkl5             | NP_001019795.1 | <u>3</u> | <u>0.58</u> | <u>3</u> | <b>3</b> | <u>2</u> | <u>2</u> | cyclin-dependent kinase-like 5 [Mus musculus]                                                           | 105 |
| 902.1 | GI:120407050 | Nop58             | NP_061356.2    | <u>3</u> | <u>0.58</u> | <u>3</u> | <b>3</b> | <u>2</u> | <u>2</u> | nucleolar protein 58 [Mus musculus]                                                                     | 60  |
| 908.1 | GI:110625609 | Cdh13             | NP_062681.2    | <u>3</u> | <u>0.58</u> | <u>3</u> | <b>3</b> | <u>2</u> | <u>2</u> | cadherin-13 precursor [Mus musculus]                                                                    | 78  |
| 915.1 | GI:13195604  | Rps23             | NP_077137.1    | <u>3</u> | <u>0.58</u> | <u>3</u> | <b>3</b> | <u>2</u> | <u>2</u> | 40S ribosomal protein S23 [Mus musculus]                                                                | 16  |
| 923.1 | GI:13430890  | Hist1h1e          | NP_056602.1    | <u>3</u> | <u>0.58</u> | <u>3</u> | <b>3</b> | <u>2</u> | <u>2</u> | histone H1.4 [Mus musculus]                                                                             | 22  |
| 930.1 | GI:84875530  | Tom1l2            | NP_694720.2    | <u>3</u> | <u>0.58</u> | <u>3</u> | <b>3</b> | <u>2</u> | <u>2</u> | TOM1-like protein 2 isoform a [Mus musculus]                                                            | 56  |
| 968.1 | GI:267844806 | Chchd6            | NP_001161208.1 | <u>3</u> | <u>0.58</u> | <u>3</u> | <b>3</b> | <u>2</u> | <u>2</u> | coiled-coil-helix-coiled-coil-helix domain-containing protein 6, mitochondrial isoform 2 [Mus musculus] | 26  |
| 970.1 | GI:256220343 | Dhrs4             | NP_001033027.2 | <u>3</u> | <u>0.58</u> | <u>3</u> | <b>3</b> | <u>2</u> | <u>2</u> | dehydrogenase/reductase SDR family member 4 isoform 1 [Mus musculus]                                    | 30  |
| 980.1 | GI:162417959 | Ngef              | NP_063920.2    | <u>3</u> | <u>0.58</u> | <u>2</u> | <b>3</b> | <u>2</u> | <u>2</u> | ephexin-1 isoform 2 [Mus musculus]                                                                      | 71  |
| 981.1 | GI:160333837 | Rpl36             | NP_061200.2    | <u>3</u> | <u>0.58</u> | <u>3</u> | <b>3</b> | <u>2</u> | <u>2</u> | 60S ribosomal protein L36 [Mus musculus]                                                                | 12  |



|        |              |          |                |           |             |           |           |           |           |                                                                                                     |     |
|--------|--------------|----------|----------------|-----------|-------------|-----------|-----------|-----------|-----------|-----------------------------------------------------------------------------------------------------|-----|
| 1157.1 | GI:18017590  | Ppap2b   | NP_542122.1    | <u>2</u>  | <u>0.58</u> | <u>2</u>  | <b>3</b>  | <u>2</u>  | <u>2</u>  | lipid phosphate phosphohydrolase 3 [Mus musculus]                                                   | 35  |
| 1189.1 | GI:13385558  | Ndufb8   | NP_080337.1    | <u>2</u>  | <u>0.58</u> | <u>2</u>  | <b>3</b>  | <u>2</u>  | <u>2</u>  | NADH dehydrogenase [ubiquinone] 1 beta subcomplex subunit 8, mitochondrial precursor [Mus musculus] | 22  |
| 1210.1 | GI:10181184  | Atp5j2   | NP_065607.1    | <u>2</u>  | <u>0.58</u> | <u>2</u>  | <b>3</b>  | <u>2</u>  | <u>2</u>  | ATP synthase subunit f, mitochondrial [Mus musculus]                                                | 10  |
| 29.1   | GI:160707901 | Syn1     | NP_038708.3    | <u>30</u> | <u>0.60</u> | <u>27</u> | <b>56</b> | <u>24</u> | <u>37</u> | synapsin-1 isoform a [Mus musculus]                                                                 | 74  |
| 93.1   | GI:60687506  | Aldoc    | NP_033787.2    | <u>17</u> | <u>0.63</u> | <u>15</u> | <b>17</b> | <u>11</u> | <u>11</u> | fructose-bisphosphate aldolase C [Mus musculus]                                                     | 39  |
| 151.1  | GI:163954941 | Fxr1     | NP_001106659.1 | <u>14</u> | <u>0.64</u> | <u>12</u> | <b>14</b> | <u>7</u>  | <u>9</u>  | fragile X mental retardation syndrome-related protein 1 isoform 1 [Mus musculus]                    | 76  |
| 167.1  | GI:13994195  | Ppp1ca   | NP_114074.1    | <u>13</u> | <u>0.64</u> | <u>13</u> | <b>14</b> | <u>8</u>  | <u>9</u>  | serine/threonine-protein phosphatase PP1-alpha catalytic subunit [Mus musculus]                     | 38  |
| 285.1  | GI:70778976  | Pgk1     | NP_032854.2    | <u>9</u>  | <u>0.65</u> | <u>8</u>  | <b>11</b> | <u>5</u>  | <u>7</u>  | phosphoglycerate kinase 1 [Mus musculus]                                                            | 45  |
| 107.1  | GI:161168996 | Caskin1  | NP_082213.2    | <u>16</u> | <u>0.68</u> | <u>15</u> | <b>16</b> | <u>10</u> | <u>10</u> | caskin-1 [Mus musculus]                                                                             | 150 |
| 145.2  | GI:15011853  | Stx1a    | NP_058081.2    | <u>6</u>  | <u>0.68</u> | <u>6</u>  | <b>8</b>  | <u>5</u>  | <u>5</u>  | syntaxin-1A [Mus musculus]                                                                          | 33  |
| 222.1  | GI:39930477  | Sept8    | NP_149156.1    | <u>11</u> | <u>0.68</u> | <u>8</u>  | <b>8</b>  | <u>5</u>  | <u>5</u>  | septin-8 isoform 1 [Mus musculus]                                                                   | 50  |
| 233.1  | GI:46849708  | Sucla2   | NP_035636.1    | <u>10</u> | <u>0.68</u> | <u>8</u>  | <b>8</b>  | <u>5</u>  | <u>5</u>  | succinyl-CoA ligase [ADP-forming] subunit beta, mitochondrial precursor [Mus musculus]              | 50  |
| 258.1  | GI:6754974   | Pacsin1  | NP_035991.1    | <u>10</u> | <u>0.68</u> | <u>8</u>  | <b>8</b>  | <u>5</u>  | <u>5</u>  | protein kinase C and casein kinase substrate in neurons protein 1 isoform 1 [Mus musculus]          | 51  |
| 493.1  | GI:13385942  | Cs       | NP_080720.1    | <u>6</u>  | <u>0.68</u> | <u>6</u>  | <b>8</b>  | <u>3</u>  | <u>5</u>  | citrate synthase, mitochondrial precursor [Mus musculus]                                            | 52  |
| 40.2   | GI:31981562  | Pkm      | NP_035229.2    | <u>23</u> | <u>0.69</u> | <u>21</u> | <b>29</b> | <u>16</u> | <u>18</u> | pyruvate kinase, muscle isoform M2 [Mus musculus]                                                   | 58  |
| 131.1  | GI:10946574  | Ckb      | NP_067248.1    | <u>15</u> | <u>0.70</u> | <u>14</u> | <b>26</b> | <u>12</u> | <u>16</u> | creatine kinase B-type [Mus musculus]                                                               | 43  |
| 169.1  | GI:6754012   | Gnao1    | NP_034438.1    | <u>13</u> | <u>0.71</u> | <u>12</u> | <b>18</b> | <u>8</u>  | <u>11</u> | guanine nucleotide-binding protein G(o) subunit alpha isoform A [Mus musculus]                      | 40  |
| 21.2   | GI:77681962  | Ank2     | NP_848770.2    | <u>19</u> | <u>0.72</u> | <u>16</u> | <b>23</b> | <u>14</u> | <u>14</u> | ankyrin-2 isoform 2 [Mus musculus]                                                                  | 117 |
| 3.4    | GI:84490394  | Sptb     | NP_038703.3    | <u>44</u> | <u>0.74</u> | <u>33</u> | <b>35</b> | <u>21</u> | <u>21</u> | spectrin beta chain, erythrocytic [Mus musculus]                                                    | 268 |
| 73.1   | GI:356582492 | Ogdh     | NP_001239217.1 | <u>20</u> | <u>0.74</u> | <u>15</u> | <b>15</b> | <u>9</u>  | <u>9</u>  | 2-oxoglutarate dehydrogenase, mitochondrial isoform 4 [Mus musculus]                                | 116 |
| 131.2  | GI:6753428   | Ckmt1    | NP_034027.1    | <u>9</u>  | <u>0.74</u> | <u>8</u>  | <b>10</b> | <u>5</u>  | <u>6</u>  | creatine kinase U-type, mitochondrial precursor [Mus musculus]                                      | 47  |
| 154.5  | GI:226874906 | Ywhae    | NP_033562.3    | <u>11</u> | <u>0.74</u> | <u>9</u>  | <b>10</b> | <u>6</u>  | <u>6</u>  | 14-3-3 protein epsilon [Mus musculus]                                                               | 29  |
| 300.1  | GI:358030316 | Dmtn     | NP_001239592.1 | <u>9</u>  | <u>0.74</u> | <u>9</u>  | <b>10</b> | <u>6</u>  | <u>6</u>  | dematin isoform 2 [Mus musculus]                                                                    | 43  |
| 370.1  | GI:257467575 | Trappe9  | NP_850993.2    | <u>8</u>  | <u>0.74</u> | <u>4</u>  | <b>5</b>  | <u>3</u>  | <u>3</u>  | trafficking protein particle complex subunit 9 isoform 2 [Mus musculus]                             | 127 |
| 482.1  | GI:126723336 | Phb2     | NP_031557.2    | <u>6</u>  | <u>0.74</u> | <u>5</u>  | <b>5</b>  | <u>3</u>  | <u>3</u>  | prohibitin-2 [Mus musculus]                                                                         | 33  |
| 489.1  | GI:47059480  | Srpk2    | NP_033300.2    | <u>6</u>  | <u>0.74</u> | <u>5</u>  | <b>5</b>  | <u>3</u>  | <u>3</u>  | SRSF protein kinase 2 [Mus musculus]                                                                | 77  |
| 502.1  | GI:82900057  | Gm5566   | XP_485703.2    | <u>6</u>  | <u>0.74</u> | <u>5</u>  | <b>5</b>  | <u>3</u>  | <u>3</u>  | PREDICTED: nucleoside diphosphate kinase B-like [Mus musculus]                                      | 20  |
| 502.2  | GI:37700232  | Nme1     | NP_032730.1    | <u>5</u>  | <u>0.74</u> | <u>5</u>  | <b>5</b>  | <u>3</u>  | <u>3</u>  | nucleoside diphosphate kinase A [Mus musculus]                                                      | 17  |
| 518.1  | GI:254540200 | Mapk8ip3 | NP_001156920.1 | <u>6</u>  | <u>0.74</u> | <u>5</u>  | <b>5</b>  | <u>3</u>  | <u>3</u>  | C-Jun-amino-terminal kinase-interacting protein 3 isoform c [Mus musculus]                          | 146 |
| 532.1  | GI:7710012   | Crym     | NP_057878.1    | <u>5</u>  | <u>0.74</u> | <u>4</u>  | <b>5</b>  | <u>3</u>  | <u>3</u>  | ketimine reductase mu-crystallin [Mus musculus]                                                     | 34  |

|       |              |                   |                |           |      |           |    |           |    |                                                                                                                         |     |
|-------|--------------|-------------------|----------------|-----------|------|-----------|----|-----------|----|-------------------------------------------------------------------------------------------------------------------------|-----|
| 569.1 | GI:21312036  | Rufy3             | NP_081806.1    | <u>5</u>  | 0.74 | <u>5</u>  | 5  | <u>3</u>  | 3  | protein RUFY3 [Mus musculus]                                                                                            | 53  |
| 614.1 | GI:84875493  | Negr1             | NP_001034183.1 | <u>5</u>  | 0.74 | <u>4</u>  | 5  | <u>3</u>  | 3  | neuronal growth regulator 1 isoform a precursor [Mus musculus]                                                          | 38  |
| 633.1 | GI:291290991 | Cacna2d2          | NP_001167521.1 | <u>5</u>  | 0.74 | <u>4</u>  | 5  | <u>3</u>  | 3  | voltage-dependent calcium channel subunit alpha-2/delta-2 isoform 5 precursor [Mus musculus]                            | 130 |
| 634.1 | GI:255069804 | 6430548<br>M08Rik | NP_001157233.1 | <u>5</u>  | 0.74 | <u>5</u>  | 5  | <u>3</u>  | 3  | uncharacterized protein KIAA0513 isoform b [Mus musculus]                                                               | 45  |
| 708.1 | GI:18266680  | Oxct1             | NP_077150.1    | <u>4</u>  | 0.74 | <u>4</u>  | 5  | <u>3</u>  | 3  | succinyl-CoA:3-ketoacid coenzyme A transferase 1, mitochondrial precursor [Mus musculus]                                | 56  |
| 752.1 | GI:6677799   | Rps15             | NP_033117.1    | <u>4</u>  | 0.74 | <u>3</u>  | 5  | <u>2</u>  | 3  | 40S ribosomal protein S15 [Mus musculus]                                                                                | 17  |
| 764.1 | GI:6754586   | Ly6h              | NP_035967.1    | <u>4</u>  | 0.74 | <u>4</u>  | 5  | <u>2</u>  | 3  | lymphocyte antigen 6H isoform a precursor [Mus musculus]                                                                | 17  |
| 766.1 | GI:6679583   | Rab11b            | NP_033023.1    | <u>4</u>  | 0.74 | <u>4</u>  | 5  | <u>3</u>  | 3  | ras-related protein Rab-11B [Mus musculus]                                                                              | 24  |
| 888.1 | GI:13385652  | Rps20             | NP_080423.1    | <u>3</u>  | 0.74 | <u>3</u>  | 5  | <u>3</u>  | 3  | 40S ribosomal protein S20 [Mus musculus]                                                                                | 13  |
| 69.1  | GI:112363090 | Ctnnd2            | NP_032755.2    | <u>20</u> | 0.77 | <u>17</u> | 17 | <u>10</u> | 10 | catenin delta-2 [Mus musculus]                                                                                          | 135 |
| 7.1   | GI:312433957 | Macf1             | NP_001186066.1 | <u>72</u> | 0.77 | <u>57</u> | 58 | <u>33</u> | 34 | microtubule-actin cross-linking factor 1 isoform 2 [Mus musculus]                                                       | 608 |
| 139.1 | GI:85861224  | Gria2             | NP_038568.2    | <u>15</u> | 0.81 | <u>13</u> | 14 | <u>8</u>  | 8  | glutamate receptor 2 isoform 2 precursor [Mus musculus]                                                                 | 99  |
| 283.1 | GI:126521835 | Cct2              | NP_031662.2    | <u>9</u>  | 0.81 | <u>6</u>  | 7  | <u>3</u>  | 4  | T-complex protein 1 subunit beta [Mus musculus]                                                                         | 57  |
| 309.1 | GI:6753320   | Cct3              | NP_033966.1    | <u>8</u>  | 0.81 | <u>7</u>  | 7  | <u>4</u>  | 4  | T-complex protein 1 subunit gamma [Mus musculus]                                                                        | 61  |
| 316.1 | GI:47564092  | Fbxo41            | NP_001001160.1 | <u>8</u>  | 0.81 | <u>6</u>  | 7  | <u>3</u>  | 4  | F-box only protein 41 [Mus musculus]                                                                                    | 94  |
| 386.1 | GI:30425330  | Lsamp             | NP_780757.1    | <u>7</u>  | 0.81 | <u>7</u>  | 7  | <u>4</u>  | 4  | limbic system-associated membrane protein precursor [Mus musculus]                                                      | 38  |
| 389.1 | GI:23956156  | Lsm14a            | NP_080224.1    | <u>7</u>  | 0.81 | <u>7</u>  | 7  | <u>4</u>  | 4  | protein LSM14 homolog A [Mus musculus]                                                                                  | 51  |
| 424.1 | GI:170784834 | Eps15l1           | NP_031970.2    | <u>7</u>  | 0.81 | <u>6</u>  | 7  | <u>3</u>  | 4  | epidermal growth factor receptor substrate 15-like 1 isoform a [Mus musculus]                                           | 99  |
| 432.1 | GI:51339023  | Dlgap1            | NP_808307.2    | <u>7</u>  | 0.81 | <u>7</u>  | 7  | <u>4</u>  | 4  | disks large-associated protein 1 isoform 1 [Mus musculus]                                                               | 110 |
| 504.1 | GI:75677414  | Ctnn              | NP_031829.2    | <u>6</u>  | 0.81 | <u>5</u>  | 7  | <u>4</u>  | 4  | src substrate cortactin isoform 1 [Mus musculus]                                                                        | 61  |
| 206.1 | GI:51921285  | Git1              | NP_001004144.1 | <u>11</u> | 0.85 | <u>9</u>  | 9  | <u>5</u>  | 5  | ARF GTPase-activating protein GIT1 [Mus musculus]                                                                       | 85  |
| 236.1 | GI:239985513 | Atad3a            | NP_849534.2    | <u>10</u> | 0.85 | <u>9</u>  | 9  | <u>5</u>  | 5  | ATPase family AAA domain-containing protein 3 [Mus musculus]                                                            | 67  |
| 242.1 | GI:148528987 | Coro2b            | NP_780693.2    | <u>10</u> | 0.85 | <u>9</u>  | 9  | <u>5</u>  | 5  | coronin-2B [Mus musculus]                                                                                               | 55  |
| 294.1 | GI:254553458 | Gpi1              | NP_032181.2    | <u>9</u>  | 0.85 | <u>9</u>  | 9  | <u>5</u>  | 5  | glucose-6-phosphate isomerase [Mus musculus]                                                                            | 63  |
| 160.1 | GI:170172546 | Wdr47             | NP_852065.2    | <u>13</u> | 0.87 | <u>10</u> | 11 | <u>6</u>  | 6  | WD repeat-containing protein 47 [Mus musculus]                                                                          | 102 |
| 273.1 | GI:31981515  | Rpl7              | NP_035421.2    | <u>9</u>  | 0.87 | <u>9</u>  | 11 | <u>6</u>  | 6  | 60S ribosomal protein L7 [Mus musculus]                                                                                 | 31  |
| 39.1  | GI:167234392 | Clasp2            | NP_001107819.1 | <u>27</u> | 0.89 | <u>25</u> | 26 | <u>14</u> | 14 | CLIP-associating protein 2 isoform c [Mus musculus]                                                                     | 166 |
| 130.1 | GI:117168299 | Grin2b            | NP_032197.3    | <u>15</u> | 0.89 | <u>11</u> | 13 | <u>7</u>  | 7  | glutamate receptor ionotropic, NMDA 2B precursor [Mus musculus]                                                         | 166 |
| 208.1 | GI:257796245 | Dlat              | NP_663589.3    | <u>11</u> | 0.91 | <u>10</u> | 15 | <u>7</u>  | 8  | dihydrolipoyllysine-residue acetyltransferase component of pyruvate dehydrogenase complex, mitochondrial [Mus musculus] | 68  |

|       |              |          |                |           |             |    |    |          |          |                                                                                               |     |
|-------|--------------|----------|----------------|-----------|-------------|----|----|----------|----------|-----------------------------------------------------------------------------------------------|-----|
| 74.1  | GI:256773220 | Synj1    | NP_001157955.1 | <u>20</u> | <u>1.00</u> | 18 | 18 | <u>9</u> | <u>9</u> | synaptojanin-1 isoform a [Mus musculus]                                                       | 176 |
| 117.2 | GI:256355198 | Sbf2     | NP_796298.2    | <u>2</u>  | <u>1.00</u> | 2  | 2  | <u>1</u> | <u>1</u> | SET-binding factor 2 [Mus musculus]                                                           | 210 |
| 129.2 | GI:21312236  | Hspa12b  | NP_082582.1    | <u>2</u>  | <u>1.00</u> | 2  | 2  | <u>1</u> | <u>1</u> | heat shock 70 kDa protein 12B [Mus musculus]                                                  | 76  |
| 158.1 | GI:162287370 | Lmna     | NP_001002011.2 | <u>14</u> | <u>1.00</u> | 12 | 12 | <u>6</u> | <u>6</u> | prelamin-A/C isoform A precursor [Mus musculus]                                               | 74  |
| 169.2 | GI:74271899  | Gnai1    | NP_034435.1    | <u>7</u>  | <u>1.00</u> | 6  | 6  | <u>3</u> | <u>3</u> | guanine nucleotide-binding protein G(i) subunit alpha-1 [Mus musculus]                        | 40  |
| 261.1 | GI:328927083 | Map4     | NP_001192261.1 | <u>10</u> | <u>1.00</u> | 9  | 10 | <u>5</u> | <u>5</u> | microtubule-associated protein 4 isoform 4 [Mus musculus]                                     | 114 |
| 288.2 | GI:6754086   | Gstm5    | NP_034490.1    | <u>4</u>  | <u>1.00</u> | 4  | 4  | <u>2</u> | <u>2</u> | glutathione S-transferase Mu 5 [Mus musculus]                                                 | 27  |
| 295.2 | GI:26986555  | Myl6b    | NP_758463.1    | <u>3</u>  | <u>1.00</u> | 2  | 2  | <u>1</u> | <u>1</u> | myosin light chain 6B [Mus musculus]                                                          | 23  |
| 306.1 | GI:6755100   | Pa2g4    | NP_035249.1    | <u>8</u>  | <u>1.00</u> | 8  | 8  | <u>4</u> | <u>4</u> | proliferation-associated protein 2G4 [Mus musculus]                                           | 44  |
| 320.1 | GI:31982856  | Dld      | NP_031887.2    | <u>8</u>  | <u>1.00</u> | 6  | 6  | <u>3</u> | <u>3</u> | dihydrolipoyl dehydrogenase, mitochondrial precursor [Mus musculus]                           | 54  |
| 357.1 | GI:71061458  | Dnm1l    | NP_690029.2    | <u>8</u>  | <u>1.00</u> | 6  | 6  | <u>3</u> | <u>3</u> | dynamin-1-like protein isoform a [Mus musculus]                                               | 79  |
| 366.1 | GI:307344692 | Arhgap32 | NP_001182561.1 | <u>8</u>  | <u>1.00</u> | 6  | 6  | <u>3</u> | <u>3</u> | rho GTPase-activating protein 32 isoform 1 [Mus musculus]                                     | 230 |
| 376.1 | GI:84043961  | Eif5b    | NP_938045.2    | <u>7</u>  | <u>1.00</u> | 6  | 6  | <u>3</u> | <u>3</u> | eukaryotic translation initiation factor 5B [Mus musculus]                                    | 138 |
| 394.1 | GI:18250284  | Idh3a    | NP_083849.1    | <u>7</u>  | <u>1.00</u> | 7  | 8  | <u>4</u> | <u>4</u> | isocitrate dehydrogenase [NAD] subunit alpha, mitochondrial precursor [Mus musculus]          | 40  |
| 400.1 | GI:145587092 | Mllt4    | NP_034936.1    | <u>7</u>  | <u>1.00</u> | 6  | 6  | <u>3</u> | <u>3</u> | afadin [Mus musculus]                                                                         | 206 |
| 439.1 | GI:226958657 | Rpl19    | NP_001152955.1 | <u>7</u>  | <u>1.00</u> | 5  | 6  | <u>2</u> | <u>3</u> | 60S ribosomal protein L19 isoform 2 [Mus musculus]                                            | 23  |
| 447.1 | GI:83745120  | Rplp2    | NP_080296.3    | <u>6</u>  | <u>1.00</u> | 5  | 6  | <u>3</u> | <u>3</u> | 60S acidic ribosomal protein P2 [Mus musculus]                                                | 12  |
| 451.1 | GI:6996913   | Anxa2    | NP_031611.1    | <u>6</u>  | <u>1.00</u> | 4  | 4  | <u>2</u> | <u>2</u> | annexin A2 [Mus musculus]                                                                     | 39  |
| 452.1 | GI:6755304   | Pitpnm2  | NP_035386.1    | <u>6</u>  | <u>1.00</u> | 6  | 6  | <u>3</u> | <u>3</u> | membrane-associated phosphatidylinositol transfer protein 2 [Mus musculus]                    | 142 |
| 500.1 | GI:90903235  | Gpx4     | NP_032188.3    | <u>6</u>  | <u>1.00</u> | 4  | 4  | <u>2</u> | <u>2</u> | phospholipid hydroperoxide glutathione peroxidase, nuclear isoform 2 precursor [Mus musculus] | 22  |
| 503.1 | GI:7657357   | Nap1l1   | NP_056596.1    | <u>6</u>  | <u>1.00</u> | 5  | 6  | <u>3</u> | <u>3</u> | nucleosome assembly protein 1-like 1 isoform 2 [Mus musculus]                                 | 45  |
| 530.1 | GI:7949005   | Atp5j    | NP_058035.1    | <u>5</u>  | <u>1.00</u> | 4  | 4  | <u>2</u> | <u>2</u> | ATP synthase-coupling factor 6, mitochondrial precursor [Mus musculus]                        | 12  |
| 549.1 | GI:31982520  | Acadl    | NP_031407.2    | <u>5</u>  | <u>1.00</u> | 4  | 4  | <u>2</u> | <u>2</u> | long-chain specific acyl-CoA dehydrogenase, mitochondrial precursor [Mus musculus]            | 48  |
| 550.1 | GI:31982044  | Ntm      | NP_758494.2    | <u>5</u>  | <u>1.00</u> | 4  | 6  | <u>3</u> | <u>3</u> | neurotrimin precursor [Mus musculus]                                                          | 38  |
| 575.1 | GI:163644329 | Apoe     | NP_033826.2    | <u>5</u>  | <u>1.00</u> | 5  | 6  | <u>3</u> | <u>3</u> | apolipoprotein E precursor [Mus musculus]                                                     | 36  |
| 587.1 | GI:124487229 | Bcr      | NP_001074881.1 | <u>5</u>  | <u>1.00</u> | 4  | 4  | <u>2</u> | <u>2</u> | breakpoint cluster region protein [Mus musculus]                                              | 143 |
| 593.1 | GI:110625979 | Eef1g    | NP_080283.3    | <u>5</u>  | <u>1.00</u> | 4  | 4  | <u>2</u> | <u>2</u> | elongation factor 1-gamma [Mus musculus]                                                      | 50  |
| 596.2 | GI:18700032  | Anp32b   | NP_570959.1    | <u>2</u>  | <u>1.00</u> | 2  | 2  | <u>1</u> | <u>1</u> | acidic leucine-rich nuclear phosphoprotein 32 family member B [Mus musculus]                  | 31  |
| 599.1 | GI:114205428 | Rcn2     | NP_036122.2    | <u>5</u>  | <u>1.00</u> | 4  | 4  | <u>2</u> | <u>2</u> | reticulocalbin-2 isoform 1 precursor [Mus musculus]                                           | 37  |
| 605.1 | GI:112181194 | Pak1     | NP_035165.2    | <u>5</u>  | <u>1.00</u> | 4  | 4  | <u>2</u> | <u>2</u> | serine/threonine-protein kinase PAK 1 [Mus musculus]                                          | 61  |
| 615.1 | GI:82918395  | Gm6834   | XP_900154.1    | <u>5</u>  | <u>1.00</u> | 4  | 6  | <u>3</u> | <u>3</u> | PREDICTED: 40S ribosomal protein S13-like [Mus musculus]                                      | 17  |

|       |              |          |                |          |             |          |   |          |   |                                                                                                  |     |
|-------|--------------|----------|----------------|----------|-------------|----------|---|----------|---|--------------------------------------------------------------------------------------------------|-----|
| 624.1 | GI:556522611 | Trim9    | NP_001273317.1 | <u>5</u> | <u>1.00</u> | <u>4</u> | 4 | <u>2</u> | 2 | E3 ubiquitin-protein ligase TRIM9 isoform f [Mus musculus]                                       | 90  |
| 626.1 | GI:510936915 | Rab18    | NP_001265376.1 | <u>5</u> | <u>1.00</u> | <u>4</u> | 4 | <u>2</u> | 2 | ras-related protein Rab-18 isoform 1 [Mus musculus]                                              | 24  |
| 632.1 | GI:311771690 | Ak1      | NP_001185720.1 | <u>5</u> | <u>1.00</u> | <u>4</u> | 4 | <u>2</u> | 2 | adenylate kinase isoenzyme 1 isoform 2 [Mus musculus]                                            | 22  |
| 666.1 | GI:6677983   | Clpb     | NP_033217.1    | <u>4</u> | <u>1.00</u> | <u>3</u> | 4 | <u>2</u> | 2 | caseinolytic peptidase B protein homolog [Mus musculus]                                          | 76  |
| 668.1 | GI:61888838  | Hsd17b10 | NP_058043.3    | <u>4</u> | <u>1.00</u> | <u>4</u> | 4 | <u>2</u> | 2 | 3-hydroxyacyl-CoA dehydrogenase type-2 [Mus musculus]                                            | 27  |
| 674.1 | GI:42415475  | P4hb     | NP_035162.1    | <u>4</u> | <u>1.00</u> | <u>4</u> | 4 | <u>2</u> | 2 | protein disulfide-isomerase precursor [Mus musculus]                                             | 57  |
| 676.1 | GI:34328286  | Sdhb     | NP_075863.2    | <u>4</u> | <u>1.00</u> | <u>4</u> | 4 | <u>2</u> | 2 | succinate dehydrogenase [ubiquinone] iron-sulfur subunit, mitochondrial precursor [Mus musculus] | 32  |
| 696.1 | GI:227330633 | Pgm2     | NP_082408.3    | <u>4</u> | <u>1.00</u> | <u>4</u> | 4 | <u>2</u> | 2 | phosphoglucomutase-2 [Mus musculus]                                                              | 61  |
| 703.1 | GI:21536256  | Ppp1r1b  | NP_659077.1    | <u>4</u> | <u>1.00</u> | <u>2</u> | 2 | <u>1</u> | 1 | protein phosphatase 1 regulatory subunit 1B [Mus musculus]                                       | 22  |
| 715.1 | GI:148747526 | Rab7     | NP_033031.2    | <u>4</u> | <u>1.00</u> | <u>4</u> | 4 | <u>2</u> | 2 | ras-related protein Rab-7a [Mus musculus]                                                        | 23  |
| 721.1 | GI:124244104 | Atxn2    | NP_033151.2    | <u>4</u> | <u>1.00</u> | <u>4</u> | 4 | <u>2</u> | 2 | ataxin-2 [Mus musculus]                                                                          | 136 |
| 739.2 | GI:253970431 | Jakmip3  | NP_082984.1    | <u>2</u> | <u>1.00</u> | <u>2</u> | 2 | <u>1</u> | 1 | janus kinase and microtubule-interacting protein 3 [Mus musculus]                                | 99  |
| 745.1 | GI:266458391 | Kras     | NP_067259.4    | <u>4</u> | <u>1.00</u> | <u>4</u> | 4 | <u>2</u> | 2 | GTPase KRas [Mus musculus]                                                                       | 21  |
| 745.3 | GI:21704066  | Rap1a    | NP_663516.1    | <u>4</u> | <u>1.00</u> | <u>4</u> | 4 | <u>2</u> | 2 | ras-related protein Rap-1A precursor [Mus musculus]                                              | 21  |
| 746.1 | GI:255003793 | Rps26    | NP_038793.2    | <u>4</u> | <u>1.00</u> | <u>4</u> | 4 | <u>2</u> | 2 | 40S ribosomal protein S26 [Mus musculus]                                                         | 13  |
| 750.1 | GI:11528490  | Flii     | NP_071292.1    | <u>4</u> | <u>1.00</u> | <u>3</u> | 4 | <u>2</u> | 2 | protein flightless-1 homolog [Mus musculus]                                                      | 145 |
| 751.1 | GI:110625954 | Ndufv2   | NP_082664.1    | <u>4</u> | <u>1.00</u> | <u>3</u> | 4 | <u>2</u> | 2 | NADH dehydrogenase [ubiquinone] flavoprotein 2, mitochondrial isoform 1 precursor [Mus musculus] | 27  |
| 755.1 | GI:23956078  | Abcf2    | NP_038881.1    | <u>4</u> | <u>1.00</u> | <u>4</u> | 4 | <u>2</u> | 2 | ATP-binding cassette sub-family F member 2 isoform 1 [Mus musculus]                              | 72  |
| 758.1 | GI:84662766  | Elavl4   | NP_034618.2    | <u>4</u> | <u>1.00</u> | <u>4</u> | 4 | <u>1</u> | 2 | ELAV-like protein 4 isoform a [Mus musculus]                                                     | 42  |
| 819.1 | GI:60097931  | Ermn     | NP_084248.2    | <u>3</u> | <u>1.00</u> | <u>2</u> | 2 | <u>1</u> | 1 | ermin [Mus musculus]                                                                             | 32  |
| 829.1 | GI:34538601  | COX2     | NP_904331.1    | <u>3</u> | <u>1.00</u> | <u>3</u> | 4 | <u>1</u> | 2 | cytochrome c oxidase subunit II (mitochondrion) [Mus musculus]                                   | 26  |
| 853.1 | GI:221139790 | Dgkd     | NP_808314.2    | <u>3</u> | <u>1.00</u> | <u>2</u> | 2 | <u>1</u> | 1 | diacylglycerol kinase, delta [Mus musculus]                                                      | 135 |
| 858.1 | GI:21314824  | Atp6v1f  | NP_079657.1    | <u>3</u> | <u>1.00</u> | <u>2</u> | 2 | <u>1</u> | 1 | V-type proton ATPase subunit F [Mus musculus]                                                    | 13  |
| 867.1 | GI:188497724 | Hdgf     | NP_032257.3    | <u>3</u> | <u>1.00</u> | <u>2</u> | 2 | <u>1</u> | 1 | hepatoma-derived growth factor [Mus musculus]                                                    | 26  |
| 895.1 | GI:124517709 | Gad2     | NP_032104.2    | <u>3</u> | <u>1.00</u> | <u>2</u> | 2 | <u>1</u> | 1 | glutamate decarboxylase 2 [Mus musculus]                                                         | 65  |
| 896.1 | GI:124487457 | Map7d2   | NP_001074593.1 | <u>3</u> | <u>1.00</u> | <u>2</u> | 2 | <u>1</u> | 1 | MAP7 domain-containing protein 2 [Mus musculus]                                                  | 86  |
| 912.1 | GI:227908861 | Kif3b    | NP_032470.3    | <u>3</u> | <u>1.00</u> | <u>2</u> | 2 | <u>1</u> | 1 | kinesin-like protein KIF3B [Mus musculus]                                                        | 85  |
| 922.2 | GI:119395752 | Kcna1    | NP_034725.3    | <u>3</u> | <u>1.00</u> | <u>2</u> | 2 | <u>1</u> | 1 | potassium voltage-gated channel subfamily A member 1 [Mus musculus]                              | 56  |
| 929.1 | GI:86990450  | Myo1b    | NP_034993.2    | <u>3</u> | <u>1.00</u> | <u>2</u> | 2 | <u>1</u> | 1 | unconventional myosin-Ib isoform 2 [Mus musculus]                                                | 128 |
| 932.1 | GI:83921581  | Psd3     | NP_084539.2    | <u>3</u> | <u>1.00</u> | <u>2</u> | 2 | <u>1</u> | 1 | PH and SEC7 domain-containing protein 3 isoform 1 [Mus musculus]                                 | 58  |

|        |              |                   |             |          |             |          |          |          |          |                                                                                           |     |
|--------|--------------|-------------------|-------------|----------|-------------|----------|----------|----------|----------|-------------------------------------------------------------------------------------------|-----|
| 934.1  | GI:82886797  | H3f3c             | XP_894986.1 | <u>3</u> | <u>1.00</u> | <u>2</u> | <b>2</b> | <u>1</u> | <b>1</b> | PREDICTED: histone H3.3C-like [Mus musculus]                                              | 15  |
| 936.1  | GI:7304989   | Ctbp1             | NP_038530.1 | <u>3</u> | <u>1.00</u> | <u>2</u> | <b>2</b> | <u>1</u> | <b>1</b> | C-terminal-binding protein 1 isoform 3 [Mus musculus]                                     | 48  |
| 941.1  | GI:63487024  | Gm13653           | XP_619762.1 | <u>3</u> | <u>1.00</u> | <u>3</u> | <b>4</b> | <u>2</u> | <b>2</b> | PREDICTED: 60S ribosomal protein L21-like [Mus musculus]                                  | 19  |
| 949.1  | GI:46559434  | Tceal5            | NP_808587.1 | <u>3</u> | <u>1.00</u> | <u>2</u> | <b>2</b> | <u>1</u> | <b>1</b> | transcription elongation factor A protein-like 5 [Mus musculus]                           | 22  |
| 966.1  | GI:28372479  | Rps25             | NP_077228.1 | <u>3</u> | <u>1.00</u> | <u>3</u> | <b>4</b> | <u>2</u> | <b>2</b> | 40S ribosomal protein S25 [Mus musculus]                                                  | 14  |
| 988.1  | GI:9790141   | Arpc3             | NP_062798.1 | <u>2</u> | <u>1.00</u> | <u>2</u> | <b>2</b> | <u>1</u> | <b>1</b> | actin-related protein 2/3 complex subunit 3 [Mus musculus]                                | 21  |
| 994.1  | GI:94721328  | Vapa              | NP_038961.2 | <u>2</u> | <u>1.00</u> | <u>2</u> | <b>2</b> | <u>1</u> | <b>1</b> | vesicle-associated membrane protein-associated protein A [Mus musculus]                   | 28  |
| 996.1  | GI:93102417  | Gars              | NP_851009.2 | <u>2</u> | <u>1.00</u> | <u>2</u> | <b>2</b> | <u>1</u> | <b>1</b> | glycine--tRNA ligase [Mus musculus]                                                       | 82  |
| 1002.1 | GI:84662745  | Gnaq              | NP_032165.3 | <u>2</u> | <u>1.00</u> | <u>2</u> | <b>2</b> | <u>1</u> | <b>1</b> | guanine nucleotide-binding protein G(q) subunit alpha [Mus musculus]                      | 42  |
| 1018.1 | GI:6755995   | Wdr1              | NP_035845.1 | <u>2</u> | <u>1.00</u> | <u>2</u> | <b>2</b> | <u>1</u> | <b>1</b> | WD repeat-containing protein 1 [Mus musculus]                                             | 66  |
| 1025.1 | GI:6755000   | Pded6             | NP_035181.1 | <u>2</u> | <u>1.00</u> | <u>2</u> | <b>2</b> | <u>1</u> | <b>1</b> | programmed cell death protein 6 [Mus musculus]                                            | 22  |
| 1031.1 | GI:6680988   | Cox6a1            | NP_031774.1 | <u>2</u> | <u>1.00</u> | <u>2</u> | <b>2</b> | <u>1</u> | <b>1</b> | cytochrome c oxidase subunit 6A1, mitochondrial [Mus musculus]                            | 12  |
| 1032.1 | GI:6680826   | Cacng2            | NP_031609.1 | <u>2</u> | <u>1.00</u> | <u>2</u> | <b>2</b> | <u>1</u> | <b>1</b> | voltage-dependent calcium channel gamma-2 subunit [Mus musculus]                          | 36  |
| 1035.1 | GI:6680083   | Grb2              | NP_032189.1 | <u>2</u> | <u>1.00</u> | <u>2</u> | <b>2</b> | <u>1</u> | <b>1</b> | growth factor receptor-bound protein 2 [Mus musculus]                                     | 25  |
| 1036.1 | GI:6679641   | Emd               | NP_031953.1 | <u>2</u> | <u>1.00</u> | <u>2</u> | <b>2</b> | <u>1</u> | <b>1</b> | emerin [Mus musculus]                                                                     | 29  |
| 1041.1 | GI:56699423  | Nedd4             | NP_035020.2 | <u>2</u> | <u>1.00</u> | <u>2</u> | <b>2</b> | <u>1</u> | <b>1</b> | E3 ubiquitin-protein ligase NEDD4 [Mus musculus]                                          | 103 |
| 1056.1 | GI:34328138  | Kif3a             | NP_032469.2 | <u>2</u> | <u>1.00</u> | <u>2</u> | <b>2</b> | <u>1</u> | <b>1</b> | kinesin-like protein KIF3A [Mus musculus]                                                 | 80  |
| 1062.1 | GI:31981830  | Cox7a2            | NP_034075.2 | <u>2</u> | <u>1.00</u> | <u>2</u> | <b>2</b> | <u>1</u> | <b>1</b> | cytochrome c oxidase subunit 7A2, mitochondrial precursor [Mus musculus]                  | 9   |
| 1075.1 | GI:30519997  | Blmh              | NP_848760.1 | <u>2</u> | <u>1.00</u> | <u>2</u> | <b>2</b> | <u>1</u> | <b>1</b> | bleomycin hydrolase [Mus musculus]                                                        | 52  |
| 1077.1 | GI:29150272  | Sec13             | NP_077168.2 | <u>2</u> | <u>1.00</u> | <u>2</u> | <b>2</b> | <u>1</u> | <b>1</b> | protein SEC13 homolog [Mus musculus]                                                      | 36  |
| 1079.1 | GI:28893409  | Enpp6             | NP_796278.1 | <u>2</u> | <u>1.00</u> | <u>2</u> | <b>2</b> | <u>1</u> | <b>1</b> | ectonucleotide pyrophosphatase/phosphodiesterase family member 6 precursor [Mus musculus] | 51  |
| 1081.1 | GI:27777697  | Palm2             | NP_766456.1 | <u>2</u> | <u>1.00</u> | <u>2</u> | <b>2</b> | <u>1</u> | <b>1</b> | paralectin-2 [Mus musculus]                                                               | 42  |
| 1084.1 | GI:27370360  | Slc6a11           | NP_766478.1 | <u>2</u> | <u>1.00</u> | <u>2</u> | <b>2</b> | <u>1</u> | <b>1</b> | sodium- and chloride-dependent GABA transporter 3 [Mus musculus]                          | 70  |
| 1085.1 | GI:27369996  | N28178            | NP_766278.1 | <u>2</u> | <u>1.00</u> | <u>2</u> | <b>2</b> | <u>1</u> | <b>1</b> | protein KIAA1045 [Mus musculus]                                                           | 41  |
| 1090.1 | GI:262072980 | 2410002F<br>23Rik | NP_080156.2 | <u>2</u> | <u>1.00</u> | <u>2</u> | <b>2</b> | <u>1</u> | <b>1</b> | uncharacterized protein LOC668661 [Mus musculus]                                          | 32  |
| 1101.1 | GI:254540089 | Prpsap1           | NP_080640.1 | <u>2</u> | <u>1.00</u> | <u>2</u> | <b>2</b> | <u>1</u> | <b>1</b> | phosphoribosyl pyrophosphate synthase-associated protein 1 [Mus musculus]                 | 42  |
| 1105.1 | GI:254281331 | Slc1a4            | NP_061349.3 | <u>2</u> | <u>1.00</u> | <u>2</u> | <b>2</b> | <u>1</u> | <b>1</b> | neutral amino acid transporter A [Mus musculus]                                           | 56  |
| 1123.1 | GI:226530884 | Pcmt1             | NP_032812.2 | <u>2</u> | <u>1.00</u> | <u>2</u> | <b>2</b> | <u>1</u> | <b>1</b> | protein-L-isoaspartate(D-aspartate) O-methyltransferase [Mus musculus]                    | 30  |
| 1129.1 | GI:22122515  | Ahsa1             | NP_666148.1 | <u>2</u> | <u>1.00</u> | <u>2</u> | <b>2</b> | <u>1</u> | <b>1</b> | activator of 90 kDa heat shock protein ATPase homolog 1 [Mus musculus]                    | 38  |
| 1136.1 | GI:21450291  | Aldob             | NP_659152.1 | <u>2</u> | <u>1.00</u> | <u>2</u> | <b>2</b> | <u>1</u> | <b>1</b> | fructose-bisphosphate aldolase B [Mus musculus]                                           | 39  |



|        |              |          |                |          |             |          |          |          |          |                                                                                                       |     |
|--------|--------------|----------|----------------|----------|-------------|----------|----------|----------|----------|-------------------------------------------------------------------------------------------------------|-----|
| 1138.1 | GI:21426821  | Rps28    | NP_058540.1    | <u>2</u> | <u>1.00</u> | <u>2</u> | <b>2</b> | <u>1</u> | <b>1</b> | 40S ribosomal protein S28 [Mus musculus]                                                              | 8   |
| 1139.1 | GI:21314832  | Ugp2     | NP_647458.1    | <u>2</u> | <u>1.00</u> | <u>2</u> | <b>2</b> | <u>1</u> | <b>1</b> | UTP--glucose-1-phosphate uridylyltransferase [Mus musculus]                                           | 57  |
| 1150.1 | GI:19526848  | Marc2    | NP_598445.1    | <u>2</u> | <u>1.00</u> | <u>2</u> | <b>2</b> | <u>1</u> | <b>1</b> | MOSC domain-containing protein 2, mitochondrial precursor [Mus musculus]                              | 38  |
| 1155.1 | GI:188528613 | Gmfb     | NP_071306.2    | <u>2</u> | <u>1.00</u> | <u>2</u> | <b>2</b> | <u>1</u> | <b>1</b> | glia maturation factor beta [Mus musculus]                                                            | 17  |
| 1167.1 | GI:162417952 | Lrrfip1  | NP_001104782.1 | <u>2</u> | <u>1.00</u> | <u>2</u> | <b>2</b> | <u>1</u> | <b>1</b> | leucine-rich repeat flightless-interacting protein 1 isoform 3 [Mus musculus]                         | 49  |
| 1169.1 | GI:162138894 | Farsa    | NP_079924.2    | <u>2</u> | <u>1.00</u> | <u>2</u> | <b>2</b> | <u>1</u> | <b>1</b> | phenylalanine--tRNA ligase alpha subunit [Mus musculus]                                               | 58  |
| 1173.1 | GI:160333312 | Sik3     | NP_081774.3    | <u>2</u> | <u>1.00</u> | <u>2</u> | <b>2</b> | <u>1</u> | <b>1</b> | serine/threonine-protein kinase SIK3 [Mus musculus]                                                   | 151 |
| 1175.1 | GI:158937298 | Ikbkap   | NP_080355.2    | <u>2</u> | <u>1.00</u> | <u>2</u> | <b>2</b> | <u>1</u> | <b>1</b> | elongator complex protein 1 [Mus musculus]                                                            | 149 |
| 1190.1 | GI:13385322  | Ndufb7   | NP_080119.1    | <u>2</u> | <u>1.00</u> | <u>2</u> | <b>2</b> | <u>1</u> | <b>1</b> | NADH dehydrogenase [ubiquinone] 1 beta subcomplex subunit 7 [Mus musculus]                            | 16  |
| 1198.1 | GI:124486835 | Prrc2c   | NP_001074759.1 | <u>2</u> | <u>1.00</u> | <u>2</u> | <b>2</b> | <u>1</u> | <b>1</b> | protein PRRC2C [Mus musculus]                                                                         | 311 |
| 1207.1 | GI:11140825  | Trappc4  | NP_068561.1    | <u>2</u> | <u>1.00</u> | <u>2</u> | <b>2</b> | <u>1</u> | <b>1</b> | trafficking protein particle complex subunit 4 [Mus musculus]                                         | 24  |
| 1218.1 | GI:29789199  | Ipo5     | NP_076068.1    | <u>2</u> | <u>1.00</u> | <u>2</u> | <b>2</b> | <u>1</u> | <b>1</b> | importin-5 [Mus musculus]                                                                             | 124 |
| 1221.1 | GI:21313144  | Ola1     | NP_080218.1    | <u>2</u> | <u>1.00</u> | <u>2</u> | <b>2</b> | <u>1</u> | <b>1</b> | obg-like ATPase 1 isoform a [Mus musculus]                                                            | 45  |
| 1223.1 | GI:19526878  | Pycr2    | NP_598466.1    | <u>2</u> | <u>1.00</u> | <u>2</u> | <b>2</b> | <u>1</u> | <b>1</b> | pyrroline-5-carboxylate reductase 2 [Mus musculus]                                                    | 34  |
| 1228.1 | GI:9910142   | Cdc42ep4 | NP_064390.1    | <u>2</u> | <u>1.00</u> | <u>2</u> | <b>2</b> | <u>1</u> | <b>1</b> | cdc42 effector protein 4 [Mus musculus]                                                               | 38  |
| 1233.1 | GI:88853581  | Ewsr1    | NP_031994.2    | <u>2</u> | <u>1.00</u> | <u>2</u> | <b>2</b> | <u>1</u> | <b>1</b> | RNA-binding protein EWS isoform 2 [Mus musculus]                                                      | 68  |
| 1235.1 | GI:8567358   | Gucy1b3  | NP_059497.1    | <u>2</u> | <u>1.00</u> | <u>2</u> | <b>2</b> | <u>1</u> | <b>1</b> | guanylate cyclase soluble subunit beta-1 isoform 1 [Mus musculus]                                     | 71  |
| 1240.1 | GI:77404294  | Usmg5    | NP_075700.2    | <u>2</u> | <u>1.00</u> | <u>2</u> | <b>2</b> | <u>1</u> | <b>1</b> | up-regulated during skeletal muscle growth protein 5 [Mus musculus]                                   | 6   |
| 1245.1 | GI:6754912   | Numb     | NP_035079.1    | <u>2</u> | <u>1.00</u> | <u>2</u> | <b>2</b> | <u>1</u> | <b>1</b> | protein numb homolog isoform 2 [Mus musculus]                                                         | 66  |
| 1247.1 | GI:6752968   | Adam23   | NP_035910.1    | <u>2</u> | <u>1.00</u> | <u>2</u> | <b>2</b> | <u>1</u> | <b>1</b> | disintegrin and metalloproteinase domain-containing protein 23 isoform 2 preproprotein [Mus musculus] | 91  |
| 1251.1 | GI:58037267  | Pdia6    | NP_082235.1    | <u>2</u> | <u>1.00</u> | <u>2</u> | <b>2</b> | <u>1</u> | <b>1</b> | protein disulfide-isomerase A6 precursor [Mus musculus]                                               | 49  |
| 1260.1 | GI:37718972  | Smarcc2  | NP_937803.1    | <u>2</u> | <u>1.00</u> | <u>2</u> | <b>2</b> | <u>1</u> | <b>1</b> | SWI/SNF complex subunit SMARCC2 isoform 3 [Mus musculus]                                              | 121 |
| 1263.1 | GI:31542139  | Arfgap1  | NP_665703.2    | <u>2</u> | <u>1.00</u> | <u>2</u> | <b>2</b> | <u>1</u> | <b>1</b> | ADP-ribosylation factor GTPase-activating protein 1 isoform a [Mus musculus]                          | 45  |
| 1280.1 | GI:226958581 | Vwa8     | NP_776119.2    | <u>2</u> | <u>1.00</u> | <u>2</u> | <b>2</b> | <u>1</u> | <b>1</b> | von Willebrand factor A domain-containing protein 8 isoform 2 precursor [Mus musculus]                | 116 |
| 1282.1 | GI:226823266 | Dip2b    | NP_766407.2    | <u>2</u> | <u>1.00</u> | <u>1</u> | <b>2</b> | <u>1</u> | <b>1</b> | disco-interacting protein 2 homolog B isoform 2 [Mus musculus]                                        | 147 |
| 1284.1 | GI:218505741 | Atat1    | NP_001136217.1 | <u>2</u> | <u>1.00</u> | <u>2</u> | <b>2</b> | <u>1</u> | <b>1</b> | alpha-tubulin N-acetyltransferase isoform 2 [Mus musculus]                                            | 38  |
| 1288.1 | GI:194018455 | Stau2    | NP_079579.2    | <u>2</u> | <u>1.00</u> | <u>2</u> | <b>2</b> | <u>1</u> | <b>1</b> | double-stranded RNA-binding protein Staufen homolog 2 isoform 3 [Mus musculus]                        | 62  |
| 1294.1 | GI:146231979 | Ctnnd1   | NP_001078922.1 | <u>2</u> | <u>1.00</u> | <u>2</u> | <b>2</b> | <u>1</u> | <b>1</b> | catenin delta-1 isoform 4 [Mus musculus]                                                              | 102 |
| 1296.1 | GI:122939198 | Clta     | NP_058040.2    | <u>2</u> | <u>1.00</u> | <u>2</u> | <b>2</b> | <u>1</u> | <b>1</b> | clathrin light chain A isoform c [Mus musculus]                                                       | 26  |
| 1343.1 | GI:6753078   | Ap3s1    | NP_033811.1    | <u>1</u> | <u>1.00</u> | <u>1</u> | <b>2</b> | <u>1</u> | <b>1</b> | AP-3 complex subunit sigma-1 [Mus musculus]                                                           | 22  |
| 1344.1 | GI:6680177   | Hbb-y    | NP_032247.1    | <u>1</u> | <u>1.00</u> | <u>1</u> | <b>2</b> | <u>1</u> | <b>1</b> | hemoglobin subunit epsilon-Y2 [Mus musculus]                                                          | 16  |

|        |              |              |                |           |             |           |           |          |          |                                                                                               |     |
|--------|--------------|--------------|----------------|-----------|-------------|-----------|-----------|----------|----------|-----------------------------------------------------------------------------------------------|-----|
| 1379.1 | GI:56711244  | Ndufs6       | NP_035018.1    | <u>1</u>  | <u>1.00</u> | <u>1</u>  | <b>2</b>  | <u>1</u> | <b>1</b> | NADH dehydrogenase [ubiquinone] iron-sulfur protein 6, mitochondrial precursor [Mus musculus] | 13  |
| 1458.1 | GI:25777750  | Pgbd5        | NP_741958.1    | <u>1</u>  | <u>1.00</u> | <u>1</u>  | <b>2</b>  | <u>1</u> | <b>1</b> | piggyBac transposable element derived 5 [Mus musculus]                                        | 46  |
| 1538.1 | GI:16716475  | Ddx50        | NP_444413.1    | <u>1</u>  | <u>1.00</u> | <u>2</u>  | <b>2</b>  | <u>1</u> | <b>1</b> | ATP-dependent RNA helicase DDX50 [Mus musculus]                                               | 82  |
| 1661.1 | GI:6755642   | Sprr2i       | NP_035605.1    | <u>1</u>  | <u>1.00</u> | <u>1</u>  | <b>2</b>  | <u>1</u> | <b>1</b> | small proline-rich protein 2I [Mus musculus]                                                  | 8   |
| 1751.1 | GI:169790823 | Dazap1       | NP_001116077.1 | <u>1</u>  | <u>1.00</u> | <u>1</u>  | <b>2</b>  | <u>1</u> | <b>1</b> | DAZ-associated protein 1 isoform c [Mus musculus]                                             | 43  |
| 1755.1 | GI:162287296 | Rbm8a        | NP_001095877.1 | <u>1</u>  | <u>1.00</u> | <u>1</u>  | <b>2</b>  | <u>1</u> | <b>1</b> | RNA-binding protein 8A isoform a [Mus musculus]                                               | 20  |
| 170.6  | GI:112983636 | Krt10        | NP_034790.2    | <u>5</u>  | <u>1.10</u> | <u>5</u>  | <b>15</b> | <u>3</u> | <b>7</b> | keratin, type I cytoskeletal 10 [Mus musculus]                                                | 57  |
| 80.1   | GI:124430578 | Ryr2         | NP_076357.2    | <u>19</u> | <u>1.12</u> | <u>13</u> | <b>13</b> | <u>6</u> | <b>6</b> | ryanodine receptor 2 [Mus musculus]                                                           | 564 |
| 291.1  | GI:109638747 | Snca         | NP_001035916.1 | <u>9</u>  | <u>1.14</u> | <u>9</u>  | <b>11</b> | <u>4</u> | <b>5</b> | alpha-synuclein [Mus musculus]                                                                | 14  |
| 498.1  | GI:160333553 | Rpl12        | NP_033102.2    | <u>6</u>  | <u>1.14</u> | <u>6</u>  | <b>11</b> | <u>4</u> | <b>5</b> | 60S ribosomal protein L12 [Mus musculus]                                                      | 18  |
| 154.6  | GI:6756037   | Ywhah        | NP_035868.1    | <u>9</u>  | <u>1.17</u> | <u>9</u>  | <b>9</b>  | <u>4</u> | <b>4</b> | 14-3-3 protein eta [Mus musculus]                                                             | 28  |
| 251.2  | GI:120300971 | Erc1         | NP_444434.2    | <u>10</u> | <u>1.17</u> | <u>9</u>  | <b>9</b>  | <u>4</u> | <b>4</b> | ELKS/Rab6-interacting/CAST family member 1 isoform 1 [Mus musculus]                           | 128 |
| 333.1  | GI:13507666  | Lactb        | NP_109642.1    | <u>8</u>  | <u>1.17</u> | <u>8</u>  | <b>9</b>  | <u>4</u> | <b>4</b> | serine beta-lactamase-like protein LACTB, mitochondrial precursor [Mus musculus]              | 61  |
| 139.2  | GI:163792196 | Gria3        | NP_058582.3    | <u>6</u>  | <u>1.22</u> | <u>6</u>  | <b>7</b>  | <u>3</u> | <b>3</b> | glutamate receptor 3 precursor [Mus musculus]                                                 | 100 |
| 280.1  | GI:18152793  | Pdhb         | NP_077183.1    | <u>9</u>  | <u>1.22</u> | <u>9</u>  | <b>14</b> | <u>6</u> | <b>6</b> | pyruvate dehydrogenase E1 component subunit beta, mitochondrial precursor [Mus musculus]      | 39  |
| 398.1  | GI:161016795 | Ddx6         | NP_001104296.1 | <u>7</u>  | <u>1.22</u> | <u>7</u>  | <b>7</b>  | <u>3</u> | <b>3</b> | probable ATP-dependent RNA helicase DDX6 [Mus musculus]                                       | 54  |
| 714.1  | GI:148747558 | Prdx2        | NP_035693.3    | <u>4</u>  | <u>1.22</u> | <u>4</u>  | <b>7</b>  | <u>3</u> | <b>3</b> | peroxiredoxin-2 [Mus musculus]                                                                | 22  |
| 180.1  | GI:6680027   | Glud1        | NP_032159.1    | <u>12</u> | <u>1.26</u> | <u>11</u> | <b>12</b> | <u>5</u> | <b>5</b> | glutamate dehydrogenase 1, mitochondrial precursor [Mus musculus]                             | 61  |
| 170.7  | GI:6754480   | Krt13        | NP_034792.1    | <u>4</u>  | <u>1.32</u> | <u>4</u>  | <b>5</b>  | <u>2</u> | <b>2</b> | keratin, type I cytoskeletal 13 [Mus musculus]                                                | 48  |
| 343.2  | GI:6753050   | Bin1         | NP_033798.1    | <u>5</u>  | <u>1.32</u> | <u>5</u>  | <b>5</b>  | <u>2</u> | <b>2</b> | myc box-dependent-interacting protein 1 isoform 1 [Mus musculus]                              | 64  |
| 448.1  | GI:77404392  | Snd1         | NP_062750.2    | <u>6</u>  | <u>1.32</u> | <u>5</u>  | <b>5</b>  | <u>2</u> | <b>2</b> | staphylococcal nuclease domain-containing protein 1 [Mus musculus]                            | 102 |
| 523.1  | GI:9789873   | Metap2       | NP_062622.1    | <u>5</u>  | <u>1.32</u> | <u>4</u>  | <b>5</b>  | <u>2</u> | <b>2</b> | methionine aminopeptidase 2 [Mus musculus]                                                    | 53  |
| 581.1  | GI:14149756  | Eif2s2       | NP_080306.1    | <u>5</u>  | <u>1.32</u> | <u>5</u>  | <b>5</b>  | <u>2</u> | <b>2</b> | eukaryotic translation initiation factor 2 subunit 2 [Mus musculus]                           | 38  |
| 625.1  | GI:550822234 | Hp1bp3       | NP_001272408.1 | <u>5</u>  | <u>1.32</u> | <u>5</u>  | <b>5</b>  | <u>2</u> | <b>2</b> | heterochromatin protein 1-binding protein 3 isoform 3 [Mus musculus]                          | 61  |
| 726.1  | GI:112181167 | C1qbp        | NP_031599.2    | <u>4</u>  | <u>1.32</u> | <u>3</u>  | <b>5</b>  | <u>2</u> | <b>2</b> | complement component 1 Q subcomponent-binding protein, mitochondrial [Mus musculus]           | 31  |
| 956.1  | GI:377837258 | LOC100862455 | XP_003689266.1 | <u>3</u>  | <u>1.32</u> | <u>3</u>  | <b>5</b>  | <u>2</u> | <b>2</b> | PREDICTED: 60S ribosomal protein L23-like [Mus musculus]                                      | 15  |
| 141.1  | GI:228008297 | Tubgcp2      | NP_598516.2    | <u>15</u> | <u>1.42</u> | <u>8</u>  | <b>8</b>  | <u>3</u> | <b>3</b> | gamma-tubulin complex component 2 isoform a [Mus musculus]                                    | 103 |
| 318.1  | GI:39930567  | Tubgcp3      | NP_932148.1    | <u>8</u>  | <u>1.42</u> | <u>8</u>  | <b>8</b>  | <u>3</u> | <b>3</b> | gamma-tubulin complex component 3 [Mus musculus]                                              | 103 |
| 494.1  | GI:158966704 | Rps16        | NP_038675.2    | <u>6</u>  | <u>1.42</u> | <u>6</u>  | <b>8</b>  | <u>3</u> | <b>3</b> | 40S ribosomal protein S16 [Mus musculus]                                                      | 16  |
| 102.1  | GI:283135190 | Cdc42bp<br>b | NP_898837.2    | <u>16</u> | <u>1.46</u> | <u>10</u> | <b>11</b> | <u>4</u> | <b>4</b> | serine/threonine-protein kinase MRCK beta [Mus musculus]                                      | 195 |

|       |              |          |                |           |             |          |          |          |          |                                                                                               |     |
|-------|--------------|----------|----------------|-----------|-------------|----------|----------|----------|----------|-----------------------------------------------------------------------------------------------|-----|
| 169.4 | GI:33563256  | Gnai3    | NP_034436.1    | <u>3</u>  | <u>1.58</u> | <u>3</u> | <b>3</b> | <u>1</u> | <b>1</b> | guanine nucleotide-binding protein G(k) subunit alpha [Mus musculus]                          | 41  |
| 245.1 | GI:118026911 | Myo1d    | NP_796364.2    | <u>10</u> | <u>1.58</u> | <u>6</u> | <b>6</b> | <u>2</u> | <b>2</b> | unconventional myosin-1d [Mus musculus]                                                       | 116 |
| 263.1 | GI:260166721 | Ckap5    | NP_001159461.1 | <u>10</u> | <u>1.58</u> | <u>9</u> | <b>9</b> | <u>3</u> | <b>3</b> | cytoskeleton-associated protein 5 isoform 1 [Mus musculus]                                    | 225 |
| 310.1 | GI:6753236   | Cacna2d3 | NP_033915.1    | <u>8</u>  | <u>1.58</u> | <u>6</u> | <b>6</b> | <u>2</u> | <b>2</b> | voltage-dependent calcium channel subunit alpha-2/delta-3 precursor [Mus musculus]            | 123 |
| 351.1 | GI:54144633  | Phactr1  | NP_940811.2    | <u>8</u>  | <u>1.58</u> | <u>5</u> | <b>6</b> | <u>2</u> | <b>2</b> | phosphatase and actin regulator 1 isoform 1 [Mus musculus]                                    | 74  |
| 396.1 | GI:163310765 | Alb      | NP_033784.2    | <u>7</u>  | <u>1.58</u> | <u>7</u> | <b>9</b> | <u>3</u> | <b>3</b> | serum albumin precursor [Mus musculus]                                                        | 69  |
| 464.1 | GI:28201978  | Pdhx     | NP_780303.1    | <u>6</u>  | <u>1.58</u> | <u>6</u> | <b>6</b> | <u>2</u> | <b>2</b> | pyruvate dehydrogenase protein X component, mitochondrial [Mus musculus]                      | 54  |
| 471.1 | GI:170295840 | Trim28   | NP_035718.2    | <u>6</u>  | <u>1.58</u> | <u>6</u> | <b>6</b> | <u>2</u> | <b>2</b> | transcription intermediary factor 1-beta [Mus musculus]                                       | 89  |
| 570.1 | GI:19527258  | Aldh6a1  | NP_598803.1    | <u>5</u>  | <u>1.58</u> | <u>5</u> | <b>6</b> | <u>2</u> | <b>2</b> | methylmalonate-semialdehyde dehydrogenase [acylating], mitochondrial precursor [Mus musculus] | 58  |
| 647.1 | GI:87159826  | Arhgap26 | NP_780373.3    | <u>4</u>  | <u>1.58</u> | <u>3</u> | <b>3</b> | <u>1</u> | <b>1</b> | rho GTPase-activating protein 26 [Mus musculus]                                               | 92  |
| 659.1 | GI:6681095   | Cycc     | NP_031834.1    | <u>4</u>  | <u>1.58</u> | <u>3</u> | <b>3</b> | <u>1</u> | <b>1</b> | cytochrome c, somatic [Mus musculus]                                                          | 12  |
| 673.1 | GI:491222947 | Farsb    | NP_001265004.1 | <u>4</u>  | <u>1.58</u> | <u>3</u> | <b>3</b> | <u>1</u> | <b>1</b> | phenylalanine--tRNA ligase beta subunit [Mus musculus]                                        | 66  |
| 705.1 | GI:19745150  | Cyb5r3   | NP_084063.1    | <u>4</u>  | <u>1.58</u> | <u>3</u> | <b>3</b> | <u>1</u> | <b>1</b> | NADH-cytochrome b5 reductase 3 [Mus musculus]                                                 | 34  |
| 748.2 | GI:41281824  | Syt7     | NP_775090.1    | <u>3</u>  | <u>1.58</u> | <u>3</u> | <b>3</b> | <u>1</u> | <b>1</b> | synaptotagmin-7 beta isoform [Mus musculus]                                                   | 51  |
| 756.1 | GI:23346611  | Cpne5    | NP_694806.1    | <u>4</u>  | <u>1.58</u> | <u>3</u> | <b>3</b> | <u>1</u> | <b>1</b> | copine-5 [Mus musculus]                                                                       | 66  |
| 760.1 | GI:78711836  | Akap2    | NP_001030610.1 | <u>4</u>  | <u>1.58</u> | <u>3</u> | <b>3</b> | <u>1</u> | <b>1</b> | A-kinase anchor protein 2 isoform 1 [Mus musculus]                                            | 99  |
| 774.1 | GI:359751382 | Prkar1b  | NP_001240819.1 | <u>4</u>  | <u>1.58</u> | <u>3</u> | <b>3</b> | <u>1</u> | <b>1</b> | cAMP-dependent protein kinase type I-beta regulatory subunit [Mus musculus]                   | 43  |
| 780.1 | GI:27151744  | Sh3kbp1  | NP_067364.2    | <u>4</u>  | <u>1.58</u> | <u>3</u> | <b>3</b> | <u>1</u> | <b>1</b> | SH3 domain-containing kinase-binding protein 1 isoform 2 [Mus musculus]                       | 69  |
| 790.1 | GI:9790077   | Gsk3b    | NP_062801.1    | <u>3</u>  | <u>1.58</u> | <u>3</u> | <b>3</b> | <u>1</u> | <b>1</b> | glycogen synthase kinase-3 beta [Mus musculus]                                                | 47  |
| 802.1 | GI:6755204   | Psmb5    | NP_035316.1    | <u>3</u>  | <u>1.58</u> | <u>3</u> | <b>3</b> | <u>1</u> | <b>1</b> | proteasome subunit beta type-5 [Mus musculus]                                                 | 29  |
| 825.1 | GI:407263288 | Gm9769   | XP_003945448.1 | <u>3</u>  | <u>1.58</u> | <u>3</u> | <b>3</b> | <u>1</u> | <b>1</b> | PREDICTED: prostaglandin E synthase 3-like [Mus musculus]                                     | 19  |
| 848.1 | GI:226823367 | Fh1      | NP_034339.2    | <u>3</u>  | <u>1.58</u> | <u>3</u> | <b>3</b> | <u>1</u> | <b>1</b> | fumarate hydratase, mitochondrial precursor [Mus musculus]                                    | 54  |
| 854.1 | GI:22094989  | Timm50   | NP_079892.1    | <u>3</u>  | <u>1.58</u> | <u>3</u> | <b>3</b> | <u>1</u> | <b>1</b> | mitochondrial import inner membrane translocase subunit TIM50 precursor [Mus musculus]        | 40  |
| 855.1 | GI:21699066  | Appl1    | NP_660256.1    | <u>3</u>  | <u>1.58</u> | <u>2</u> | <b>3</b> | <u>1</u> | <b>1</b> | DCC-interacting protein 13-alpha [Mus musculus]                                               | 79  |
| 870.1 | GI:167614490 | Tbc1d10b | NP_653105.3    | <u>3</u>  | <u>1.58</u> | <u>3</u> | <b>3</b> | <u>1</u> | <b>1</b> | TBC1 domain family member 10B [Mus musculus]                                                  | 87  |
| 877.1 | GI:157951596 | Car2     | NP_033931.4    | <u>3</u>  | <u>1.58</u> | <u>3</u> | <b>3</b> | <u>1</u> | <b>1</b> | carbonic anhydrase 2 [Mus musculus]                                                           | 29  |
| 882.1 | GI:153792029 | Sh2d5    | NP_001093101.1 | <u>3</u>  | <u>1.58</u> | <u>3</u> | <b>3</b> | <u>1</u> | <b>1</b> | SH2 domain-containing protein 5 [Mus musculus]                                                | 47  |
| 886.1 | GI:134031994 | Psm2     | NP_032970.2    | <u>3</u>  | <u>1.58</u> | <u>3</u> | <b>3</b> | <u>1</u> | <b>1</b> | proteasome subunit alpha type-2 [Mus musculus]                                                | 26  |
| 897.1 | GI:124487059 | Rimbp2   | NP_001074857.1 | <u>3</u>  | <u>1.58</u> | <u>3</u> | <b>3</b> | <u>1</u> | <b>1</b> | RIMS-binding protein 2 [Mus musculus]                                                         | 119 |
| 917.1 | GI:86991442  | Lin7a    | NP_001034443.1 | <u>3</u>  | <u>1.58</u> | <u>3</u> | <b>3</b> | <u>1</u> | <b>1</b> | protein lin-7 homolog A isoform 1 [Mus musculus]                                              | 26  |

|        |              |          |                |           |             |           |           |          |          |                                                                                                                                 |     |
|--------|--------------|----------|----------------|-----------|-------------|-----------|-----------|----------|----------|---------------------------------------------------------------------------------------------------------------------------------|-----|
| 917.2  | GI:6755973   | Lin7c    | NP_035829.1    | <u>3</u>  | <u>1.58</u> | <u>3</u>  | <b>3</b>  | <u>1</u> | <b>1</b> | protein lin-7 homolog C [Mus musculus]                                                                                          | 22  |
| 920.2  | GI:33859660  | Ppp2r5e  | NP_036154.1    | <u>2</u>  | <u>1.58</u> | <u>2</u>  | <b>3</b>  | <u>1</u> | <b>1</b> | serine/threonine-protein phosphatase 2A 56 kDa regulatory subunit epsilon isoform [Mus musculus]                                | 55  |
| 921.1  | GI:16716353  | Rtn3     | NP_444306.1    | <u>3</u>  | <u>1.58</u> | <u>3</u>  | <b>3</b>  | <u>1</u> | <b>1</b> | reticulon-3 isoform 4 [Mus musculus]                                                                                            | 25  |
| 939.1  | GI:6679915   | Gabrg2   | NP_032099.1    | <u>3</u>  | <u>1.58</u> | <u>3</u>  | <b>3</b>  | <u>1</u> | <b>1</b> | gamma-aminobutyric acid receptor subunit gamma-2 isoform 1 precursor [Mus musculus]                                             | 55  |
| 969.1  | GI:258547156 | Pdcd6ip  | NP_035182.2    | <u>3</u>  | <u>1.58</u> | <u>3</u>  | <b>3</b>  | <u>1</u> | <b>1</b> | programmed cell death 6-interacting protein isoform 3 [Mus musculus]                                                            | 96  |
| 971.1  | GI:254692964 | Osbpl3   | NP_001157117.1 | <u>3</u>  | <u>1.58</u> | <u>3</u>  | <b>3</b>  | <u>1</u> | <b>1</b> | oxysterol-binding protein-related protein 3 isoform 2 [Mus musculus]                                                            | 93  |
| 976.1  | GI:188219757 | Aldh7a1  | NP_613066.2    | <u>3</u>  | <u>1.58</u> | <u>3</u>  | <b>3</b>  | <u>1</u> | <b>1</b> | alpha-aminoadipic semialdehyde dehydrogenase isoform a [Mus musculus]                                                           | 59  |
| 1019.1 | GI:6755911   | Txn1     | NP_035790.1    | <u>2</u>  | <u>1.58</u> | <u>2</u>  | <b>3</b>  | <u>1</u> | <b>1</b> | thioredoxin [Mus musculus]                                                                                                      | 12  |
| 1024.1 | GI:6755084   | Prkce    | NP_035234.1    | <u>2</u>  | <u>1.58</u> | <u>2</u>  | <b>3</b>  | <u>1</u> | <b>1</b> | protein kinase C epsilon type [Mus musculus]                                                                                    | 84  |
| 1117.1 | GI:228480241 | Mtx2     | NP_058084.3    | <u>2</u>  | <u>1.58</u> | <u>2</u>  | <b>3</b>  | <u>1</u> | <b>1</b> | metaxin-2 [Mus musculus]                                                                                                        | 30  |
| 1211.1 | GI:10181142  | Jph3     | NP_065630.1    | <u>2</u>  | <u>1.58</u> | <u>2</u>  | <b>3</b>  | <u>1</u> | <b>1</b> | junctophilin-3 [Mus musculus]                                                                                                   | 81  |
| 1267.1 | GI:295789074 | Gpm6b    | NP_001171429.1 | <u>2</u>  | <u>1.58</u> | <u>2</u>  | <b>3</b>  | <u>1</u> | <b>1</b> | neuronal membrane glycoprotein M6-b isoform 3 [Mus musculus]                                                                    | 32  |
| 1286.1 | GI:203097667 | Arhgap21 | NP_001074833.3 | <u>2</u>  | <u>1.58</u> | <u>2</u>  | <b>3</b>  | <u>1</u> | <b>1</b> | rho GTPase-activating protein 21 isoform 2 [Mus musculus]                                                                       | 216 |
| 144.1  | GI:27532959  | Aldh1l1  | NP_081682.1    | <u>14</u> | <u>1.70</u> | <u>12</u> | <b>13</b> | <u>4</u> | <b>4</b> | cytosolic 10-formyltetrahydrofolate dehydrogenase [Mus musculus]                                                                | 99  |
| 151.2  | GI:83921589  | Fxr2     | NP_035944.2    | <u>9</u>  | <u>1.74</u> | <u>8</u>  | <b>10</b> | <u>2</u> | <b>3</b> | fragile X mental retardation syndrome-related protein 2 [Mus musculus]                                                          | 74  |
| 16.14  | GI:33563250  | Des      | NP_034173.1    | <u>5</u>  | <u>1.81</u> | <u>5</u>  | <b>7</b>  | <u>2</u> | <b>2</b> | desmin [Mus musculus]                                                                                                           | 53  |
| 151.3  | GI:51036613  | Fmr1     | NP_032057.2    | <u>6</u>  | <u>1.81</u> | <u>6</u>  | <b>7</b>  | <u>2</u> | <b>2</b> | fragile X mental retardation protein 1 homolog [Mus musculus]                                                                   | 69  |
| 343.1  | GI:41281852  | Amph     | NP_778172.1    | <u>8</u>  | <u>1.81</u> | <u>7</u>  | <b>7</b>  | <u>2</u> | <b>2</b> | amphiphysin [Mus musculus]                                                                                                      | 75  |
| 468.1  | GI:21313536  | Dlst     | NP_084501.1    | <u>6</u>  | <u>1.81</u> | <u>5</u>  | <b>7</b>  | <u>2</u> | <b>2</b> | dihydrolipoyllysine-residue succinyltransferase component of 2-oxoglutarate dehydrogenase complex, mitochondrial [Mus musculus] | 49  |
| 2.3    | GI:19526481  | Spta1    | NP_035595.2    | <u>3</u>  | <u>2.00</u> | <u>3</u>  | <b>4</b>  | <u>1</u> | <b>1</b> | spectrin alpha chain, erythrocytic 1 [Mus musculus]                                                                             | 280 |
| 517.1  | GI:256418956 | Prps1l3  | NP_001032835.2 | <u>6</u>  | <u>2.00</u> | <u>4</u>  | <b>4</b>  | <u>1</u> | <b>1</b> | ribose-phosphate pyrophosphokinase [Mus musculus]                                                                               | 35  |
| 680.1  | GI:31981588  | Atp6v1h  | NP_598587.2    | <u>4</u>  | <u>2.00</u> | <u>4</u>  | <b>4</b>  | <u>1</u> | <b>1</b> | V-type proton ATPase subunit H [Mus musculus]                                                                                   | 56  |
| 685.1  | GI:282398108 | Rpn1     | NP_598694.3    | <u>4</u>  | <u>2.00</u> | <u>4</u>  | <b>4</b>  | <u>1</u> | <b>1</b> | dolichyl-diphosphooligosaccharide--protein glycosyltransferase subunit 1 precursor [Mus musculus]                               | 68  |
| 688.1  | GI:262118273 | Rars     | NP_080212.2    | <u>4</u>  | <u>2.00</u> | <u>4</u>  | <b>4</b>  | <u>1</u> | <b>1</b> | arginine--tRNA ligase, cytoplasmic [Mus musculus]                                                                               | 76  |
| 723.1  | GI:112807195 | Cox5b    | NP_034072.2    | <u>4</u>  | <u>2.00</u> | <u>4</u>  | <b>4</b>  | <u>1</u> | <b>1</b> | cytochrome c oxidase subunit 5B, mitochondrial [Mus musculus]                                                                   | 14  |
| 730.1  | GI:6753364   | Cdc42    | NP_033991.1    | <u>4</u>  | <u>2.00</u> | <u>4</u>  | <b>4</b>  | <u>1</u> | <b>1</b> | cell division control protein 42 homolog isoform 1 precursor [Mus musculus]                                                     | 21  |
| 735.1  | GI:27229277  | Tars     | NP_149065.2    | <u>4</u>  | <u>2.00</u> | <u>4</u>  | <b>4</b>  | <u>1</u> | <b>1</b> | threonine--tRNA ligase, cytoplasmic [Mus musculus]                                                                              | 83  |
| 773.1  | GI:404501474 | Coro2a   | NP_849224.2    | <u>4</u>  | <u>2.00</u> | <u>4</u>  | <b>4</b>  | <u>1</u> | <b>1</b> | coronin-2A isoform 1 [Mus musculus]                                                                                             | 62  |
| 828.1  | GI:37718983  | Rab35    | NP_937806.1    | <u>3</u>  | <u>2.00</u> | <u>3</u>  | <b>4</b>  | <u>1</u> | <b>1</b> | ras-related protein Rab-35 [Mus musculus]                                                                                       | 23  |
| 898.1  | GI:124486889 | Camsap2  | NP_001074829.1 | <u>3</u>  | <u>2.00</u> | <u>3</u>  | <b>4</b>  | <u>1</u> | <b>1</b> | calmodulin-regulated spectrin-associated protein 2 [Mus musculus]                                                               | 166 |

|       |              |         |                |           |             |           |           |          |          |                                                                             |     |
|-------|--------------|---------|----------------|-----------|-------------|-----------|-----------|----------|----------|-----------------------------------------------------------------------------|-----|
| 979.1 | GI:164698481 | Sept9   | NP_001106959.1 | <u>3</u>  | <u>2.00</u> | <u>3</u>  | <b>4</b>  | <u>1</u> | <u>1</u> | septin-9 isoform b [Mus musculus]                                           | 65  |
| 22.1  | GI:6724321   | Nos1    | NP_032738.1    | <u>32</u> | <u>2.28</u> | <u>30</u> | <b>34</b> | <u>7</u> | <u>7</u> | nitric oxide synthase, brain [Mus musculus]                                 | 160 |
| 346.2 | GI:126723307 | Fam120c | NP_932773.2    | <u>5</u>  | <u>2.32</u> | <u>5</u>  | <b>5</b>  | <u>1</u> | <u>1</u> | constitutive coactivator of PPAR-gamma-like protein 2 [Mus musculus]        | 120 |
| 512.1 | GI:355390244 | Nrxn3   | NP_001185516.2 | <u>6</u>  | <u>2.32</u> | <u>5</u>  | <b>5</b>  | <u>1</u> | <u>1</u> | neurexin 3 isoform 1 precursor [Mus musculus]                               | 173 |
| 525.1 | GI:93102409  | Fasn    | NP_032014.3    | <u>5</u>  | <u>2.32</u> | <u>5</u>  | <b>5</b>  | <u>1</u> | <u>1</u> | fatty acid synthase [Mus musculus]                                          | 272 |
| 574.1 | GI:167234372 | Eif4b   | NP_663600.2    | <u>5</u>  | <u>2.32</u> | <u>5</u>  | <b>5</b>  | <u>1</u> | <u>1</u> | eukaryotic translation initiation factor 4B [Mus musculus]                  | 69  |
| 595.1 | GI:6753242   | Calb1   | NP_033918.1    | <u>5</u>  | <u>2.32</u> | <u>5</u>  | <b>5</b>  | <u>1</u> | <u>1</u> | calbindin [Mus musculus]                                                    | 30  |
| 607.1 | GI:24762230  | Rps15a  | NP_733769.1    | <u>5</u>  | <u>2.32</u> | <u>5</u>  | <b>5</b>  | <u>1</u> | <u>1</u> | 40S ribosomal protein S15a [Mus musculus]                                   | 15  |
| 642.1 | GI:124248579 | G3bp2   | NP_001074266.1 | <u>5</u>  | <u>2.32</u> | <u>5</u>  | <b>5</b>  | <u>1</u> | <u>1</u> | ras GTPase-activating protein-binding protein 2 isoform a [Mus musculus]    | 54  |
| 486.1 | GI:226958516 | Rasal2  | NP_808312.3    | <u>6</u>  | <u>2.58</u> | <u>6</u>  | <b>6</b>  | <u>1</u> | <u>1</u> | RAS protein activator like 2 [Mus musculus]                                 | 144 |
| 62.1  | GI:225543191 | Crocc   | NP_742120.2    | <u>21</u> | <u>2.66</u> | <u>19</u> | <b>19</b> | <u>3</u> | <u>3</u> | rootletin isoform 1 [Mus musculus]                                          | 227 |
| 449.1 | GI:73622267  | Mccc2   | NP_084302.1    | <u>6</u>  | <u>2.81</u> | <u>5</u>  | <b>7</b>  | <u>1</u> | <u>1</u> | methylcrotonoyl-CoA carboxylase beta chain, mitochondrial [Mus musculus]    | 61  |
| 279.1 | GI:186700620 | Mccc1   | NP_076133.3    | <u>9</u>  | <u>3.32</u> | <u>9</u>  | <b>10</b> | <u>1</u> | <u>1</u> | methylcrotonoyl-CoA carboxylase subunit alpha, mitochondrial [Mus musculus] | 79  |
| 19.1  | GI:124249058 | Tecpr1  | NP_081686.1    | <u>33</u> | <u>3.84</u> | <u>33</u> | <b>43</b> | <u>3</u> | <u>3</u> | tectonin beta-propeller repeat-containing protein 1 [Mus musculus]          | 130 |
| 381.1 | GI:6753484   | Col6a1  | NP_034063.1    | <u>7</u>  | <u>6.64</u> | <u>7</u>  | <b>7</b>  | <u>0</u> | <u>0</u> | collagen alpha-1(VI) chain precursor [Mus musculus]                         | 108 |
| 89.1  | GI:339895748 | Col6a3  | NP_001229938.1 | <u>18</u> | <u>6.64</u> | <u>18</u> | <b>20</b> | <u>0</u> | <u>0</u> | collagen alpha-3(VI) chain isoform 2 precursor [Mus musculus]               | 289 |
| 362.2 | GI:47894398  | Tpm4    | NP_001001491.1 | <u>3</u>  | <u>6.64</u> | <u>2</u>  | <b>2</b>  | <u>0</u> | <u>0</u> | tropomyosin alpha-4 chain [Mus musculus]                                    | 28  |
| 423.1 | GI:23956082  | Rpl5    | NP_058676.1    | <u>7</u>  | <u>6.64</u> | <u>4</u>  | <b>4</b>  | <u>0</u> | <u>0</u> | 60S ribosomal protein L5 [Mus musculus]                                     | 34  |
| 481.1 | GI:127141012 | Mycbp2  | NP_997098.2    | <u>6</u>  | <u>6.64</u> | <u>6</u>  | <b>6</b>  | <u>0</u> | <u>0</u> | probable E3 ubiquitin-protein ligase MYCBP2 [Mus musculus]                  | 521 |
| 541.1 | GI:6681069   | Csrp1   | NP_031817.1    | <u>5</u>  | <u>6.64</u> | <u>4</u>  | <b>5</b>  | <u>0</u> | <u>0</u> | cysteine and glycine-rich protein 1 [Mus musculus]                          | 21  |
| 548.1 | GI:359718915 | Gm15800 | NP_852086.3    | <u>5</u>  | <u>6.64</u> | <u>5</u>  | <b>5</b>  | <u>0</u> | <u>0</u> | probable E3 ubiquitin-protein ligase C12orf51 homolog [Mus musculus]        | 484 |
| 559.1 | GI:247494234 | Dnajc13 | NP_001156498.1 | <u>5</u>  | <u>6.64</u> | <u>6</u>  | <b>6</b>  | <u>0</u> | <u>0</u> | DnaJ (Hsp40) homolog, subfamily C, member 13 [Mus musculus]                 | 254 |
| 568.1 | GI:21312520  | Qdpr    | NP_077198.1    | <u>5</u>  | <u>6.64</u> | <u>5</u>  | <b>5</b>  | <u>0</u> | <u>0</u> | dihydropteridine reductase [Mus musculus]                                   | 26  |
| 577.1 | GI:159110717 | Itih3   | NP_032433.2    | <u>5</u>  | <u>6.64</u> | <u>4</u>  | <b>4</b>  | <u>0</u> | <u>0</u> | inter-alpha-trypsin inhibitor heavy chain H3 precursor [Mus musculus]       | 99  |
| 631.1 | GI:312222765 | Tjp2    | NP_001185914.1 | <u>5</u>  | <u>6.64</u> | <u>4</u>  | <b>4</b>  | <u>0</u> | <u>0</u> | tight junction protein ZO-2 isoform 1 [Mus musculus]                        | 134 |
| 669.1 | GI:58037273  | Btbd17  | NP_082331.1    | <u>4</u>  | <u>6.64</u> | <u>3</u>  | <b>3</b>  | <u>0</u> | <u>0</u> | BTB/POZ domain-containing protein 17 precursor [Mus musculus]               | 53  |
| 681.1 | GI:31560247  | Tpd52l2 | NP_079758.2    | <u>4</u>  | <u>6.64</u> | <u>4</u>  | <b>4</b>  | <u>0</u> | <u>0</u> | tumor protein D54 [Mus musculus]                                            | 24  |
| 694.1 | GI:239052674 | Mvp     | NP_542369.2    | <u>4</u>  | <u>6.64</u> | <u>4</u>  | <b>4</b>  | <u>0</u> | <u>0</u> | major vault protein [Mus musculus]                                          | 97  |
| 697.1 | GI:226443414 | Kbtbd11 | NP_083392.1    | <u>4</u>  | <u>6.64</u> | <u>2</u>  | <b>2</b>  | <u>0</u> | <u>0</u> | kelch repeat and BTB domain-containing protein 11 [Mus musculus]            | 68  |
| 698.1 | GI:225637531 | Eif3f   | NP_079620.2    | <u>4</u>  | <u>6.64</u> | <u>4</u>  | <b>4</b>  | <u>0</u> | <u>0</u> | eukaryotic translation initiation factor 3 subunit F [Mus musculus]         | 38  |
| 741.1 | GI:83921618  | Ezr     | NP_033536.2    | <u>4</u>  | <u>6.64</u> | <u>4</u>  | <b>5</b>  | <u>0</u> | <u>0</u> | ezrin [Mus musculus]                                                        | 69  |



|       |              |                   |                |          |      |          |   |   |   |                                                                                                       |     |
|-------|--------------|-------------------|----------------|----------|------|----------|---|---|---|-------------------------------------------------------------------------------------------------------|-----|
| 741.2 | GI:157277948 | Rdx               | NP_033067.2    | <u>3</u> | 6.64 | <u>3</u> | 4 | 0 | 0 | radixin isoform a [Mus musculus]                                                                      | 69  |
| 748.1 | GI:160948571 | Syt7              | NP_775091.2    | <u>4</u> | 6.64 | <u>3</u> | 3 | 0 | 0 | synaptotagmin-7 gamma isoform [Mus musculus]                                                          | 63  |
| 749.1 | GI:158508485 | Nos1ap            | NP_001103455.1 | <u>4</u> | 6.64 | <u>5</u> | 5 | 0 | 0 | carboxyl-terminal PDZ ligand of neuronal nitric oxide synthase protein isoform 1 [Mus musculus]       | 56  |
| 756.2 | GI:58037333  | Cpne4             | NP_082995.1    | <u>2</u> | 6.64 | <u>2</u> | 2 | 0 | 0 | copine-4 [Mus musculus]                                                                               | 62  |
| 769.1 | GI:554894323 | Traf3             | NP_001273051.1 | <u>4</u> | 6.64 | <u>3</u> | 3 | 0 | 0 | TNF receptor-associated factor 3 isoform b [Mus musculus]                                             | 62  |
| 775.1 | GI:358438105 | Kenma1            | NP_001240307.1 | <u>4</u> | 6.64 | <u>4</u> | 5 | 0 | 0 | calcium-activated potassium channel subunit alpha-1 isoform 22 [Mus musculus]                         | 131 |
| 784.1 | GI:224967070 | Plcb1             | NP_001139302.1 | <u>4</u> | 6.64 | <u>4</u> | 4 | 0 | 0 | 1-phosphatidylinositol 4,5-bisphosphate phosphodiesterase beta-1 isoform 1 [Mus musculus]             | 138 |
| 796.1 | GI:7657031   | Nt5c              | NP_056622.1    | <u>3</u> | 6.64 | <u>3</u> | 3 | 0 | 0 | 5'(3')-deoxyribonucleotidase, cytosolic type [Mus musculus]                                           | 23  |
| 798.1 | GI:7305075   | G3bp1             | NP_038744.1    | <u>3</u> | 6.64 | <u>3</u> | 3 | 0 | 0 | ras GTPase-activating protein-binding protein 1 [Mus musculus]                                        | 52  |
| 807.1 | GI:6753508   | Cplx2             | NP_034076.1    | <u>3</u> | 6.64 | <u>2</u> | 2 | 0 | 0 | complexin-2 [Mus musculus]                                                                            | 15  |
| 814.1 | GI:6678493   | Usp10             | NP_033488.1    | <u>3</u> | 6.64 | <u>4</u> | 4 | 0 | 0 | ubiquitin carboxyl-terminal hydrolase 10 [Mus musculus]                                               | 87  |
| 817.1 | GI:62460366  | Ptms              | NP_081264.1    | <u>3</u> | 6.64 | <u>1</u> | 1 | 0 | 0 | parathyrosin [Mus musculus]                                                                           | 11  |
| 818.1 | GI:61098078  | Strn              | NP_035630.2    | <u>3</u> | 6.64 | <u>2</u> | 2 | 0 | 0 | striatin [Mus musculus]                                                                               | 86  |
| 821.1 | GI:51093867  | Cad               | NP_076014.1    | <u>3</u> | 6.64 | <u>4</u> | 4 | 0 | 0 | carbamoyl-phosphate synthetase 2, aspartate transcarbamylase, and dihydroorotase [Mus musculus]       | 243 |
| 838.1 | GI:29789341  | Ube3c             | NP_598668.1    | <u>3</u> | 6.64 | <u>2</u> | 2 | 0 | 0 | ubiquitin-protein ligase E3C [Mus musculus]                                                           | 124 |
| 841.1 | GI:27502351  | Zc2hc1a           | NP_775273.1    | <u>3</u> | 6.64 | <u>3</u> | 3 | 0 | 0 | zinc finger C2HC domain-containing protein 1A [Mus musculus]                                          | 35  |
| 845.1 | GI:255069717 | Fry               | NP_766475.2    | <u>3</u> | 6.64 | <u>2</u> | 2 | 0 | 0 | protein furry homolog [Mus musculus]                                                                  | 339 |
| 849.1 | GI:226246593 | Actr10            | NP_062759.2    | <u>3</u> | 6.64 | <u>3</u> | 3 | 0 | 0 | actin-related protein 10 [Mus musculus]                                                               | 46  |
| 862.1 | GI:21311871  | Neb1              | NP_083033.1    | <u>3</u> | 6.64 | <u>3</u> | 3 | 0 | 0 | nebulette [Mus musculus]                                                                              | 31  |
| 869.1 | GI:16905129  | Necab2            | NP_473436.1    | <u>3</u> | 6.64 | <u>3</u> | 3 | 0 | 0 | N-terminal EF-hand calcium-binding protein 2 [Mus musculus]                                           | 43  |
| 873.1 | GI:161086990 | Lzts3             | NP_922936.3    | <u>3</u> | 6.64 | <u>2</u> | 2 | 0 | 0 | leucine zipper putative tumor suppressor 3 [Mus musculus]                                             | 75  |
| 874.1 | GI:160707894 | Akr1b3            | NP_033788.3    | <u>3</u> | 6.64 | <u>3</u> | 4 | 0 | 0 | aldose reductase [Mus musculus]                                                                       | 36  |
| 875.1 | GI:160333783 | Habp4             | NP_064370.2    | <u>3</u> | 6.64 | <u>3</u> | 3 | 0 | 0 | intracellular hyaluronan-binding protein 4 [Mus musculus]                                             | 46  |
| 876.1 | GI:157951604 | Cap1              | NP_031624.2    | <u>3</u> | 6.64 | <u>3</u> | 3 | 0 | 0 | adenylyl cyclase-associated protein 1 [Mus musculus]                                                  | 52  |
| 878.1 | GI:157739867 | Lphn1             | NP_851382.2    | <u>3</u> | 6.64 | <u>2</u> | 2 | 0 | 0 | latrophilin-1 precursor [Mus musculus]                                                                | 162 |
| 880.1 | GI:157266281 | Trappc5           | NP_079977.3    | <u>3</u> | 6.64 | <u>3</u> | 3 | 0 | 0 | trafficking protein particle complex subunit 5 [Mus musculus]                                         | 21  |
| 887.1 | GI:13385798  | Dctn4             | NP_080578.1    | <u>3</u> | 6.64 | <u>3</u> | 3 | 0 | 0 | dynactin subunit 4 [Mus musculus]                                                                     | 52  |
| 925.1 | GI:13384686  | 0610009B<br>22Rik | NP_079595.1    | <u>3</u> | 6.64 | <u>2</u> | 2 | 0 | 0 | uncharacterized protein LOC66050 [Mus musculus]                                                       | 16  |
| 935.1 | GI:7656906   | Magi2             | NP_056638.1    | <u>3</u> | 6.64 | <u>2</u> | 2 | 0 | 0 | membrane-associated guanylate kinase, WW and PDZ domain-containing protein 2 isoform 2 [Mus musculus] | 123 |

|        |              |              |                |          |             |          |          |   |   |                                                                                                 |     |
|--------|--------------|--------------|----------------|----------|-------------|----------|----------|---|---|-------------------------------------------------------------------------------------------------|-----|
| 938.1  | GI:6754158   | Hap1         | NP_034534.1    | <u>3</u> | <u>6.64</u> | <u>3</u> | <b>3</b> | 0 | 0 | huntingtin-associated protein 1 isoform A [Mus musculus]                                        | 67  |
| 947.1  | GI:50838806  | Eif4g3       | NP_766291.2    | <u>3</u> | <u>6.64</u> | <u>3</u> | <b>3</b> | 0 | 0 | eukaryotic translation initiation factor 4 gamma 3 isoform 1 [Mus musculus]                     | 175 |
| 948.1  | GI:506326231 | Prnp         | NP_001265185.1 | <u>3</u> | <u>6.64</u> | <u>2</u> | <b>2</b> | 0 | 0 | major prion protein precursor [Mus musculus]                                                    | 28  |
| 951.1  | GI:46488926  | Astn1        | NP_031521.2    | <u>3</u> | <u>6.64</u> | <u>3</u> | <b>3</b> | 0 | 0 | astrotactin-1 isoform 2 precursor [Mus musculus]                                                | 144 |
| 952.1  | GI:46195430  | Ndufs8       | NP_659119.2    | <u>3</u> | <u>6.64</u> | <u>3</u> | <b>3</b> | 0 | 0 | NADH dehydrogenase [ubiquinone] iron-sulfur protein 8, mitochondrial [Mus musculus]             | 24  |
| 955.1  | GI:407262235 | LOC101056658 | XP_003946033.1 | <u>3</u> | <u>6.64</u> | <u>4</u> | <b>4</b> | 0 | 0 | PREDICTED: adenosylhomocysteinase-like [Mus musculus]                                           | 27  |
| 958.1  | GI:371122487 | Limch1       | NP_001243051.1 | <u>3</u> | <u>6.64</u> | <u>2</u> | <b>2</b> | 0 | 0 | LIM and calponin homology domains-containing protein 1 isoform 2 [Mus musculus]                 | 101 |
| 984.1  | GI:124494244 | Myo1c        | NP_001074243.1 | <u>3</u> | <u>6.64</u> | <u>2</u> | <b>2</b> | 0 | 0 | unconventional myosin-1c isoform b [Mus musculus]                                               | 118 |
| 989.1  | GI:9790055   | Mtch2        | NP_062732.1    | <u>2</u> | <u>6.64</u> | <u>2</u> | <b>2</b> | 0 | 0 | mitochondrial carrier homolog 2 [Mus musculus]                                                  | 33  |
| 991.1  | GI:9789985   | Ivd          | NP_062800.1    | <u>2</u> | <u>6.64</u> | <u>2</u> | <b>2</b> | 0 | 0 | isovaleryl-CoA dehydrogenase, mitochondrial precursor [Mus musculus]                            | 46  |
| 995.1  | GI:93102421  | Map3k4       | NP_036078.2    | <u>2</u> | <u>6.64</u> | <u>2</u> | <b>2</b> | 0 | 0 | mitogen-activated protein kinase kinase kinase 4 [Mus musculus]                                 | 180 |
| 1008.1 | GI:7305523   | Trove2       | NP_038863.1    | <u>2</u> | <u>6.64</u> | <u>2</u> | <b>2</b> | 0 | 0 | 60 kDa SS-A/Ro ribonucleoprotein [Mus musculus]                                                 | 60  |
| 1009.1 | GI:7305287   | Mt3          | NP_038631.1    | <u>2</u> | <u>6.64</u> | <u>2</u> | <b>2</b> | 0 | 0 | metallothionein-3 [Mus musculus]                                                                | 7   |
| 1011.1 | GI:72384374  | Ddx21        | NP_062426.2    | <u>2</u> | <u>6.64</u> | <u>2</u> | <b>2</b> | 0 | 0 | nucleolar RNA helicase 2 [Mus musculus]                                                         | 93  |
| 1015.1 | GI:71051609  | Rap1gap2     | NP_001015046.1 | <u>2</u> | <u>6.64</u> | <u>2</u> | <b>2</b> | 0 | 0 | rap1 GTPase-activating protein 2 [Mus musculus]                                                 | 78  |
| 1022.1 | GI:6755198   | PsmA6        | NP_036098.1    | <u>2</u> | <u>6.64</u> | <u>3</u> | <b>3</b> | 0 | 0 | proteasome subunit alpha type-6 [Mus musculus]                                                  | 27  |
| 1030.1 | GI:6753060   | Anxa5        | NP_033803.1    | <u>2</u> | <u>6.64</u> | <u>2</u> | <b>2</b> | 0 | 0 | annexin A5 [Mus musculus]                                                                       | 36  |
| 1033.1 | GI:6680690   | Prdx3        | NP_031478.1    | <u>2</u> | <u>6.64</u> | <u>2</u> | <b>2</b> | 0 | 0 | thioredoxin-dependent peroxide reductase, mitochondrial precursor [Mus musculus]                | 28  |
| 1034.1 | GI:6680447   | Impact       | NP_032404.1    | <u>2</u> | <u>6.64</u> | <u>2</u> | <b>2</b> | 0 | 0 | protein IMPACT [Mus musculus]                                                                   | 36  |
| 1040.1 | GI:59858563  | Ecm2         | NP_001012324.1 | <u>2</u> | <u>6.64</u> | <u>2</u> | <b>2</b> | 0 | 0 | extracellular matrix protein 2 precursor [Mus musculus]                                         | 77  |
| 1044.1 | GI:51491850  | Arhgef11     | NP_001003912.1 | <u>2</u> | <u>6.64</u> | <u>2</u> | <b>2</b> | 0 | 0 | rho guanine nucleotide exchange factor 11 [Mus musculus]                                        | 172 |
| 1046.1 | GI:46909607  | Ogt          | NP_631883.2    | <u>2</u> | <u>6.64</u> | <u>3</u> | <b>3</b> | 0 | 0 | UDP-N-acetylglucosamine--peptide N-acetylglucosaminyltransferase 110 kDa subunit [Mus musculus] | 117 |
| 1047.1 | GI:46592839  | Gripap1      | NP_997553.1    | <u>2</u> | <u>6.64</u> | <u>2</u> | <b>2</b> | 0 | 0 | GRIP1-associated protein 1 [Mus musculus]                                                       | 93  |
| 1048.1 | GI:45476573  | Eif3e        | NP_032414.1    | <u>2</u> | <u>6.64</u> | <u>2</u> | <b>2</b> | 0 | 0 | eukaryotic translation initiation factor 3 subunit E [Mus musculus]                             | 52  |
| 1050.1 | GI:40254624  | Pafah1b2     | NP_032801.2    | <u>2</u> | <u>6.64</u> | <u>2</u> | <b>2</b> | 0 | 0 | platelet-activating factor acetylhydrolase IB subunit beta [Mus musculus]                       | 26  |
| 1053.1 | GI:34878892  | Nfl          | NP_035027.1    | <u>2</u> | <u>6.64</u> | <u>2</u> | <b>2</b> | 0 | 0 | neurofibromin [Mus musculus]                                                                    | 319 |
| 1055.1 | GI:34328471  | Rala         | NP_062364.3    | <u>2</u> | <u>6.64</u> | <u>2</u> | <b>2</b> | 0 | 0 | ras-related protein Ral-A precursor [Mus musculus]                                              | 24  |
| 1059.1 | GI:33667095  | Vat1l        | NP_766604.2    | <u>2</u> | <u>6.64</u> | <u>2</u> | <b>2</b> | 0 | 0 | synaptic vesicle membrane protein VAT-1 homolog-like [Mus musculus]                             | 46  |
| 1060.1 | GI:31982223  | Lamb2        | NP_032509.2    | <u>2</u> | <u>6.64</u> | <u>3</u> | <b>3</b> | 0 | 0 | laminin subunit beta-2 precursor [Mus musculus]                                                 | 196 |
| 1065.1 | GI:31981086  | Efhd2        | NP_080270.2    | <u>2</u> | <u>6.64</u> | <u>2</u> | <b>2</b> | 0 | 0 | EF-hand domain-containing protein D2 [Mus musculus]                                             | 27  |

|        |              |          |                |          |             |          |          |   |   |                                                                        |     |
|--------|--------------|----------|----------------|----------|-------------|----------|----------|---|---|------------------------------------------------------------------------|-----|
| 1067.1 | GI:31980762  | Sod2     | NP_038699.2    | <u>2</u> | <u>6.64</u> | <u>2</u> | <b>2</b> | 0 | 0 | superoxide dismutase [Mn], mitochondrial precursor [Mus musculus]      | 25  |
| 1071.1 | GI:31560022  | Gys1     | NP_109603.2    | <u>2</u> | <u>6.64</u> | <u>1</u> | <b>1</b> | 0 | 0 | glycogen [starch] synthase, muscle [Mus musculus]                      | 84  |
| 1074.1 | GI:30794192  | Golga1   | NP_084069.1    | <u>2</u> | <u>6.64</u> | <u>3</u> | <b>3</b> | 0 | 0 | Golgin subfamily A member 1 [Mus musculus]                             | 87  |
| 1076.1 | GI:29789080  | Copb2    | NP_056642.1    | <u>2</u> | <u>6.64</u> | <u>2</u> | <b>2</b> | 0 | 0 | coatamer subunit beta' [Mus musculus]                                  | 102 |
| 1078.1 | GI:29126205  | Acaa2    | NP_803421.1    | <u>2</u> | <u>6.64</u> | <u>2</u> | <b>2</b> | 0 | 0 | 3-ketoacyl-CoA thiolase, mitochondrial [Mus musculus]                  | 42  |
| 1089.1 | GI:264681507 | BC037034 | NP_694801.2    | <u>2</u> | <u>6.64</u> | <u>3</u> | <b>3</b> | 0 | 0 | uncharacterized protein C7orf43 homolog [Mus musculus]                 | 63  |
| 1094.1 | GI:255308928 | Hip1r    | NP_659507.3    | <u>2</u> | <u>6.64</u> | <u>3</u> | <b>3</b> | 0 | 0 | huntingtin-interacting protein 1-related protein [Mus musculus]        | 119 |
| 1095.1 | GI:255003777 | Glod4    | NP_080305.2    | <u>2</u> | <u>6.64</u> | <u>2</u> | <b>2</b> | 0 | 0 | glyoxalase domain-containing protein 4 [Mus musculus]                  | 33  |
| 1098.1 | GI:254911014 | Ppp1r21  | NP_082934.3    | <u>2</u> | <u>6.64</u> | <u>2</u> | <b>2</b> | 0 | 0 | protein phosphatase 1 regulatory subunit 21 [Mus musculus]             | 88  |
| 1100.1 | GI:254540120 | Wrnip1   | NP_084491.3    | <u>2</u> | <u>6.64</u> | <u>2</u> | <b>2</b> | 0 | 0 | ATPase WRNIP1 [Mus musculus]                                           | 72  |
| 1102.1 | GI:254540082 | Psmb4    | NP_032971.2    | <u>2</u> | <u>6.64</u> | <u>2</u> | <b>2</b> | 0 | 0 | proteasome subunit beta type-4 precursor [Mus musculus]                | 29  |
| 1108.1 | GI:247494171 | Kctd16   | NP_080411.1    | <u>2</u> | <u>6.64</u> | <u>1</u> | <b>1</b> | 0 | 0 | BTB/POZ domain-containing protein KCTD16 [Mus musculus]                | 49  |
| 1111.1 | GI:23956104  | Ak3      | NP_067274.1    | <u>2</u> | <u>6.64</u> | <u>2</u> | <b>2</b> | 0 | 0 | GTP:AMP phosphotransferase AK3, mitochondrial [Mus musculus]           | 25  |
| 1115.1 | GI:23346557  | Oplah    | NP_694762.1    | <u>2</u> | <u>6.64</u> | <u>2</u> | <b>2</b> | 0 | 0 | 5-oxoprolinase [Mus musculus]                                          | 138 |
| 1116.1 | GI:23346547  | Cadm4    | NP_694752.1    | <u>2</u> | <u>6.64</u> | <u>2</u> | <b>2</b> | 0 | 0 | cell adhesion molecule 4 precursor [Mus musculus]                      | 43  |
| 1121.1 | GI:227116320 | Fkbp15   | NP_001038993.1 | <u>2</u> | <u>6.64</u> | <u>2</u> | <b>2</b> | 0 | 0 | FK506-binding protein 15 [Mus musculus]                                | 133 |
| 1128.1 | GI:22203747  | Col6a2   | NP_666119.1    | <u>2</u> | <u>6.64</u> | <u>2</u> | <b>2</b> | 0 | 0 | collagen alpha-2(VI) chain precursor [Mus musculus]                    | 110 |
| 1135.1 | GI:21644587  | Appl2    | NP_660255.1    | <u>2</u> | <u>6.64</u> | <u>2</u> | <b>2</b> | 0 | 0 | DCC-interacting protein 13-beta [Mus musculus]                         | 74  |
| 1144.1 | GI:21312244  | Pdzd11   | NP_082579.1    | <u>2</u> | <u>6.64</u> | <u>1</u> | <b>1</b> | 0 | 0 | PDZ domain-containing protein 11 [Mus musculus]                        | 16  |
| 1146.1 | GI:199559777 | Ppp5c    | NP_035285.2    | <u>2</u> | <u>6.64</u> | <u>2</u> | <b>2</b> | 0 | 0 | serine/threonine-protein phosphatase 5 [Mus musculus]                  | 57  |
| 1152.1 | GI:19482160  | Cotl1    | NP_082347.1    | <u>2</u> | <u>6.64</u> | <u>2</u> | <b>2</b> | 0 | 0 | coactosin-like protein [Mus musculus]                                  | 16  |
| 1156.1 | GI:18252782  | Serpinc1 | NP_543120.1    | <u>2</u> | <u>6.64</u> | <u>2</u> | <b>2</b> | 0 | 0 | antithrombin-III precursor [Mus musculus]                              | 52  |
| 1161.1 | GI:168823441 | Mcu      | NP_001028431.2 | <u>2</u> | <u>6.64</u> | <u>2</u> | <b>2</b> | 0 | 0 | calcium uniporter protein, mitochondrial precursor [Mus musculus]      | 40  |
| 1166.1 | GI:162417975 | Idh1     | NP_034627.3    | <u>2</u> | <u>6.64</u> | <u>2</u> | <b>2</b> | 0 | 0 | isocitrate dehydrogenase [NADP] cytoplasmic [Mus musculus]             | 47  |
| 1177.1 | GI:157041252 | Plin4    | NP_065593.2    | <u>2</u> | <u>6.64</u> | <u>2</u> | <b>2</b> | 0 | 0 | perilipin-4 [Mus musculus]                                             | 139 |
| 1180.1 | GI:154146209 | Usp7     | NP_001003918.2 | <u>2</u> | <u>6.64</u> | <u>2</u> | <b>2</b> | 0 | 0 | ubiquitin carboxyl-terminal hydrolase 7 [Mus musculus]                 | 128 |
| 1191.1 | GI:13385090  | Cox6b1   | NP_079904.1    | <u>2</u> | <u>6.64</u> | <u>1</u> | <b>1</b> | 0 | 0 | cytochrome c oxidase subunit 6B1 [Mus musculus]                        | 10  |
| 1194.1 | GI:133506656 | Trim35   | NP_084255.2    | <u>2</u> | <u>6.64</u> | <u>2</u> | <b>2</b> | 0 | 0 | tripartite motif-containing protein 35 [Mus musculus]                  | 59  |
| 1202.1 | GI:116268115 | Auh      | NP_057918.2    | <u>2</u> | <u>6.64</u> | <u>2</u> | <b>2</b> | 0 | 0 | methylglutaconyl-CoA hydratase, mitochondrial precursor [Mus musculus] | 33  |
| 1212.1 | GI:9790125   | Tagln3   | NP_062728.1    | <u>2</u> | <u>6.64</u> | <u>2</u> | <b>2</b> | 0 | 0 | transgelin-3 [Mus musculus]                                            | 22  |

|        |              |         |                |          |             |          |          |   |   |                                                                                                 |     |
|--------|--------------|---------|----------------|----------|-------------|----------|----------|---|---|-------------------------------------------------------------------------------------------------|-----|
| 1214.1 | GI:6680598   | Kpna4   | NP_032493.1    | <u>2</u> | <u>6.64</u> | <u>1</u> | <b>1</b> | 0 | 0 | importin subunit alpha-3 [Mus musculus]                                                         | 58  |
| 1222.1 | GI:19923070  | Tecr    | NP_598879.1    | <u>2</u> | <u>6.64</u> | <u>2</u> | <b>2</b> | 0 | 0 | very-long-chain enoyl-CoA reductase isoform 1 [Mus musculus]                                    | 36  |
| 1226.1 | GI:113680352 | Cbr1    | NP_031646.2    | <u>2</u> | <u>6.64</u> | <u>2</u> | <b>3</b> | 0 | 0 | carbonyl reductase [NADPH] 1 [Mus musculus]                                                     | 31  |
| 1232.1 | GI:92110037  | Prrc2a  | NP_064411.2    | <u>2</u> | <u>6.64</u> | <u>2</u> | <b>2</b> | 0 | 0 | protein PRRC2A isoform 1 [Mus musculus]                                                         | 229 |
| 1236.1 | GI:84781802  | Atp8a1  | NP_001034088.1 | <u>2</u> | <u>6.64</u> | <u>2</u> | <b>3</b> | 0 | 0 | probable phospholipid-transporting ATPase 1A isoform a [Mus musculus]                           | 131 |
| 1241.1 | GI:76253779  | Smarca4 | NP_035547.2    | <u>2</u> | <u>6.64</u> | <u>2</u> | <b>2</b> | 0 | 0 | transcription activator BRG1 isoform 2 [Mus musculus]                                           | 181 |
| 1243.1 | GI:70794811  | Src     | NP_033297.2    | <u>2</u> | <u>6.64</u> | <u>2</u> | <b>2</b> | 0 | 0 | neuronal proto-oncogene tyrosine-protein kinase Src isoform 1 [Mus musculus]                    | 61  |
| 1246.1 | GI:6754450   | Fabp5   | NP_034764.1    | <u>2</u> | <u>6.64</u> | <u>2</u> | <b>2</b> | 0 | 0 | fatty acid-binding protein, epidermal isoform 1 [Mus musculus]                                  | 15  |
| 1253.1 | GI:545478580 | Cacnb1  | NP_001269906.1 | <u>2</u> | <u>6.64</u> | <u>2</u> | <b>2</b> | 0 | 0 | voltage-dependent L-type calcium channel subunit beta-1 isoform E [Mus musculus]                | 70  |
| 1254.1 | GI:51243036  | Osbpl8  | NP_001003717.1 | <u>2</u> | <u>6.64</u> | <u>2</u> | <b>2</b> | 0 | 0 | oxysterol-binding protein-like protein 8 isoform b [Mus musculus]                               | 97  |
| 1255.1 | GI:47271396  | Gnas    | NP_034439.2    | <u>2</u> | <u>6.64</u> | <u>1</u> | <b>1</b> | 0 | 0 | protein GNAS isoform XLas [Mus musculus]                                                        | 121 |
| 1256.1 | GI:444741722 | Camsap1 | NP_001263290.1 | <u>2</u> | <u>6.64</u> | <u>1</u> | <b>1</b> | 0 | 0 | calmodulin-regulated spectrin-associated protein 1 isoform 3 [Mus musculus]                     | 178 |
| 1257.1 | GI:442745912 | Cp      | NP_001263177.1 | <u>2</u> | <u>6.64</u> | <u>2</u> | <b>2</b> | 0 | 0 | ceruloplasmin isoform c precursor [Mus musculus]                                                | 124 |
| 1259.1 | GI:38683822  | Abr     | NP_942598.1    | <u>2</u> | <u>6.64</u> | <u>3</u> | <b>3</b> | 0 | 0 | active breakpoint cluster region-related protein isoform 3 [Mus musculus]                       | 98  |
| 1261.1 | GI:31981302  | Anxa6   | NP_038500.2    | <u>2</u> | <u>6.64</u> | <u>2</u> | <b>2</b> | 0 | 0 | annexin A6 isoform a [Mus musculus]                                                             | 76  |
| 1270.1 | GI:291621688 | Trappe8 | NP_796012.2    | <u>2</u> | <u>6.64</u> | <u>3</u> | <b>3</b> | 0 | 0 | uncharacterized protein LOC75964 isoform 1 [Mus musculus]                                       | 161 |
| 1274.1 | GI:255918186 | Ppp6r3  | NP_083275.1    | <u>2</u> | <u>6.64</u> | <u>1</u> | <b>1</b> | 0 | 0 | serine/threonine-protein phosphatase 6 regulatory subunit 3 isoform 1 [Mus musculus]            | 98  |
| 1275.1 | GI:254750706 | Rab6a   | NP_001157135.1 | <u>2</u> | <u>6.64</u> | <u>2</u> | <b>2</b> | 0 | 0 | ras-related protein Rab-6A isoform 1 [Mus musculus]                                             | 24  |
| 1278.1 | GI:244790049 | Sqrdl   | NP_001155975.1 | <u>2</u> | <u>6.64</u> | <u>1</u> | <b>1</b> | 0 | 0 | sulfide:quinone oxidoreductase, mitochondrial [Mus musculus]                                    | 50  |
| 1285.1 | GI:206597526 | Asap2   | NP_001128664.1 | <u>2</u> | <u>6.64</u> | <u>2</u> | <b>2</b> | 0 | 0 | arf-GAP with SH3 domain, ANK repeat and PH domain-containing protein 2 isoform c [Mus musculus] | 111 |
| 1293.1 | GI:148271073 | Myadm   | NP_058665.2    | <u>2</u> | <u>6.64</u> | <u>2</u> | <b>2</b> | 0 | 0 | myeloid-associated differentiation marker [Mus musculus]                                        | 35  |
| 1297.1 | GI:121949769 | Tmpo    | NP_001073601.1 | <u>2</u> | <u>6.64</u> | <u>2</u> | <b>2</b> | 0 | 0 | lamina-associated polypeptide 2 isoform beta [Mus musculus]                                     | 38  |
| 1298.1 | GI:100816903 | Clmn    | NP_001035772.1 | <u>2</u> | <u>6.64</u> | <u>2</u> | <b>2</b> | 0 | 0 | calmin isoform b [Mus musculus]                                                                 | 113 |
| 1299.1 | GI:9937988   | Scamp5  | NP_064666.1    | <u>1</u> | <u>6.64</u> | <u>1</u> | <b>1</b> | 0 | 0 | secretory carrier-associated membrane protein 5 [Mus musculus]                                  | 26  |
| 1304.1 | GI:9055178   | Mpc1    | NP_061289.1    | <u>1</u> | <u>6.64</u> | <u>1</u> | <b>1</b> | 0 | 0 | mitochondrial pyruvate carrier 1 [Mus musculus]                                                 | 12  |
| 1306.1 | GI:86198316  | Pdia4   | NP_033917.2    | <u>1</u> | <u>6.64</u> | <u>1</u> | <b>1</b> | 0 | 0 | protein disulfide-isomerase A4 precursor [Mus musculus]                                         | 72  |
| 1307.1 | GI:85861182  | Aldh1a1 | NP_038495.2    | <u>1</u> | <u>6.64</u> | <u>1</u> | <b>1</b> | 0 | 0 | retinal dehydrogenase 1 [Mus musculus]                                                          | 54  |
| 1308.1 | GI:85702193  | Shisa6  | NP_001030046.1 | <u>1</u> | <u>6.64</u> | <u>1</u> | <b>1</b> | 0 | 0 | protein shisa-6 homolog precursor [Mus musculus]                                                | 58  |
| 1312.1 | GI:84370015  | Flg2    | NP_001013826.1 | <u>1</u> | <u>6.64</u> | <u>1</u> | <b>1</b> | 0 | 0 | filaggrin-2 [Mus musculus]                                                                      | 251 |
| 1315.1 | GI:7949018   | Cdc37   | NP_058022.1    | <u>1</u> | <u>6.64</u> | <u>1</u> | <b>1</b> | 0 | 0 | hsp90 co-chaperone Cdc37 [Mus musculus]                                                         | 45  |
| 1316.1 | GI:78191789  | Dock7   | NP_080358.3    | <u>1</u> | <u>6.64</u> | <u>2</u> | <b>2</b> | 0 | 0 | dedicator of cytokinesis protein 7 [Mus                                                         | 238 |

|        |              |          |                |          |      |          |   |   |   |                                                                                               |     |
|--------|--------------|----------|----------------|----------|------|----------|---|---|---|-----------------------------------------------------------------------------------------------|-----|
|        |              |          |                |          |      |          |   |   |   | musculus]                                                                                     |     |
| 1321.1 | GI:7305581   | Timm13   | NP_038923.1    | <u>1</u> | 6.64 | <u>1</u> | 1 | 0 | 0 | mitochondrial import inner membrane translocase subunit Tim13 [Mus musculus]                  | 10  |
| 1322.1 | GI:72384361  | Gsk3a    | NP_001026837.1 | <u>1</u> | 6.64 | <u>1</u> | 1 | 0 | 0 | glycogen synthase kinase-3 alpha [Mus musculus]                                               | 52  |
| 1326.1 | GI:7106301   | Mapre1   | NP_031922.1    | <u>1</u> | 6.64 | <u>1</u> | 1 | 0 | 0 | microtubule-associated protein RP/EB family member 1 [Mus musculus]                           | 30  |
| 1332.1 | GI:6755300   | Rbp1     | NP_035384.1    | <u>1</u> | 6.64 | <u>1</u> | 1 | 0 | 0 | retinol-binding protein 1 [Mus musculus]                                                      | 16  |
| 1333.1 | GI:6755224   | Twf2     | NP_036006.1    | <u>1</u> | 6.64 | <u>1</u> | 1 | 0 | 0 | twinfilin-2 [Mus musculus]                                                                    | 39  |
| 1339.1 | GI:6754004   | Gna11    | NP_034431.1    | <u>1</u> | 6.64 | <u>1</u> | 1 | 0 | 0 | guanine nucleotide-binding protein subunit alpha-11 [Mus musculus]                            | 42  |
| 1342.1 | GI:6753144   | Atp6v0c  | NP_033859.1    | <u>1</u> | 6.64 | <u>1</u> | 1 | 0 | 0 | V-type proton ATPase 16 kDa proteolipid subunit [Mus musculus]                                | 16  |
| 1347.1 | GI:6679891   | Ganab    | NP_032086.1    | <u>1</u> | 6.64 | <u>1</u> | 1 | 0 | 0 | neutral alpha-glucosidase AB [Mus musculus]                                                   | 109 |
| 1349.1 | GI:6679753   | Fau      | NP_032016.1    | <u>1</u> | 6.64 | <u>1</u> | 2 | 0 | 0 | 40S ribosomal protein S30 precursor [Mus musculus]                                            | 14  |
| 1355.1 | GI:6679084   | Nmt2     | NP_032734.1    | <u>1</u> | 6.64 | <u>1</u> | 1 | 0 | 0 | glycylpeptide N-tetradecanoyltransferase 2 [Mus musculus]                                     | 60  |
| 1361.1 | GI:6671519   | Adssl1   | NP_031447.1    | <u>1</u> | 6.64 | <u>1</u> | 1 | 0 | 0 | adenylosuccinate synthetase isozyme 1 [Mus musculus]                                          | 50  |
| 1362.1 | GI:62990169  | Twf1     | NP_032997.3    | <u>1</u> | 6.64 | <u>1</u> | 1 | 0 | 0 | twinfilin-1 [Mus musculus]                                                                    | 40  |
| 1364.1 | GI:62526118  | Ckap4    | NP_780660.1    | <u>1</u> | 6.64 | <u>1</u> | 1 | 0 | 0 | cytoskeleton-associated protein 4 [Mus musculus]                                              | 64  |
| 1366.1 | GI:61743961  | Ahnak    | NP_033773.1    | <u>1</u> | 6.64 | <u>1</u> | 1 | 0 | 0 | AHNAK nucleoprotein isoform 1 [Mus musculus]                                                  | 604 |
| 1369.1 | GI:58037519  | Trappc6b | NP_084333.1    | <u>1</u> | 6.64 | <u>1</u> | 1 | 0 | 0 | trafficking protein particle complex subunit 6B [Mus musculus]                                | 18  |
| 1373.1 | GI:58037289  | Cda      | NP_082452.1    | <u>1</u> | 6.64 | <u>1</u> | 1 | 0 | 0 | cytidine deaminase [Mus musculus]                                                             | 16  |
| 1375.1 | GI:58037237  | Ccdc57   | NP_082021.1    | <u>1</u> | 6.64 | <u>1</u> | 1 | 0 | 0 | coiled-coil domain-containing protein 57 [Mus musculus]                                       | 116 |
| 1381.1 | GI:51317392  | Psd      | NP_082903.2    | <u>1</u> | 6.64 | <u>1</u> | 1 | 0 | 0 | PH and SEC7 domain-containing protein 1 [Mus musculus]                                        | 110 |
| 1382.1 | GI:49615105  | Zfp781   | NP_951017.1    | <u>1</u> | 6.64 | <u>1</u> | 1 | 0 | 0 | zinc finger protein 781 [Mus musculus]                                                        | 28  |
| 1383.1 | GI:46559745  | Hook3    | NP_997542.1    | <u>1</u> | 6.64 | <u>1</u> | 1 | 0 | 0 | protein Hook homolog 3 [Mus musculus]                                                         | 83  |
| 1386.1 | GI:45476581  | Scp2     | NP_035457.1    | <u>1</u> | 6.64 | <u>1</u> | 1 | 0 | 0 | non-specific lipid-transfer protein [Mus musculus]                                            | 59  |
| 1388.1 | GI:39930335  | Abcf1    | NP_038882.1    | <u>1</u> | 6.64 | <u>1</u> | 1 | 0 | 0 | ATP-binding cassette sub-family F member 1 [Mus musculus]                                     | 95  |
| 1390.1 | GI:38455422  | Phldb1   | NP_705765.3    | <u>1</u> | 6.64 | <u>1</u> | 1 | 0 | 0 | pleckstrin homology-like domain family B member 1 [Mus musculus]                              | 150 |
| 1392.1 | GI:37718993  | Ppp2r5b  | NP_937811.1    | <u>1</u> | 6.64 | <u>1</u> | 1 | 0 | 0 | serine/threonine-protein phosphatase 2A 56 kDa regulatory subunit beta isoform [Mus musculus] | 57  |
| 1395.1 | GI:36054013  | Nptxr    | NP_109614.2    | <u>1</u> | 6.64 | <u>1</u> | 1 | 0 | 0 | neuronal pentraxin receptor [Mus musculus]                                                    | 52  |
| 1403.1 | GI:341604762 | Raph1    | NP_001038978.3 | <u>1</u> | 6.64 | <u>1</u> | 1 | 0 | 0 | Ras association (RalGDS/AF-6) and pleckstrin homology domains 1 [Mus musculus]                | 137 |
| 1406.1 | GI:33859640  | Taldo1   | NP_035658.1    | <u>1</u> | 6.64 | <u>2</u> | 2 | 0 | 0 | transaldolase [Mus musculus]                                                                  | 37  |
| 1408.1 | GI:33563282  | Psm1     | NP_036095.1    | <u>1</u> | 6.64 | <u>1</u> | 1 | 0 | 0 | proteasome subunit alpha type-1 [Mus musculus]                                                | 30  |
| 1414.1 | GI:31982664  | Itpa     | NP_080198.2    | <u>1</u> | 6.64 | <u>1</u> | 1 | 0 | 0 | inosine triphosphate pyrophosphatase [Mus musculus]                                           | 22  |
| 1416.1 | GI:31981269  | Glr3     | NP_075629.2    | <u>1</u> | 6.64 | <u>1</u> | 1 | 0 | 0 | glutaredoxin-3 [Mus musculus]                                                                 | 38  |



|        |              |               |                |          |      |          |   |   |   |                                                                                         |     |
|--------|--------------|---------------|----------------|----------|------|----------|---|---|---|-----------------------------------------------------------------------------------------|-----|
| 1422.1 | GI:31560168  | Atad1         | NP_080763.2    | <u>1</u> | 6.64 | <u>1</u> | 1 | 0 | 0 | ATPase family AAA domain-containing protein 1 [Mus musculus]                            | 41  |
| 1423.1 | GI:31543942  | Vcl           | NP_033528.3    | <u>1</u> | 6.64 | <u>1</u> | 1 | 0 | 0 | vinculin [Mus musculus]                                                                 | 117 |
| 1424.1 | GI:31542956  | Ube2k         | NP_058066.2    | <u>1</u> | 6.64 | <u>1</u> | 1 | 0 | 0 | ubiquitin-conjugating enzyme E2 K [Mus musculus]                                        | 22  |
| 1426.1 | GI:309265938 | LOC100504968  | XP_003086650.1 | <u>1</u> | 6.64 | <u>1</u> | 1 | 0 | 0 | PREDICTED: NADH dehydrogenase [ubiquinone] iron-sulfur protein 5-like [Mus musculus]    | 13  |
| 1428.1 | GI:30794432  | Chmp2b        | NP_081155.1    | <u>1</u> | 6.64 | <u>1</u> | 1 | 0 | 0 | charged multivesicular body protein 2b [Mus musculus]                                   | 24  |
| 1432.1 | GI:30520227  | Fam168a       | NP_848879.1    | <u>1</u> | 6.64 | <u>1</u> | 1 | 0 | 0 | protein FAM168A [Mus musculus]                                                          | 25  |
| 1433.1 | GI:30425338  | Wdr3          | NP_780761.1    | <u>1</u> | 6.64 | <u>1</u> | 1 | 0 | 0 | WD repeat-containing protein 3 [Mus musculus]                                           | 106 |
| 1435.1 | GI:30424726  | Rab39b        | NP_780331.1    | <u>1</u> | 6.64 | <u>1</u> | 1 | 0 | 0 | ras-related protein Rab-39B [Mus musculus]                                              | 25  |
| 1437.1 | GI:29293803  | Plcb4         | NP_038857.1    | <u>1</u> | 6.64 | <u>1</u> | 1 | 0 | 0 | 1-phosphatidylinositol-4,5-bisphosphate phosphodiesterase beta-4 [Mus musculus]         | 134 |
| 1440.1 | GI:28201956  | Rae1          | NP_780321.1    | <u>1</u> | 6.64 | <u>1</u> | 1 | 0 | 0 | mRNA export factor [Mus musculus]                                                       | 41  |
| 1441.1 | GI:28077013  | Smap1         | NP_082810.1    | <u>1</u> | 6.64 | <u>1</u> | 1 | 0 | 0 | stromal membrane-associated protein 1 [Mus musculus]                                    | 48  |
| 1442.1 | GI:28076897  | Cdipt         | NP_080914.1    | <u>1</u> | 6.64 | <u>1</u> | 1 | 0 | 0 | CDP-diacylglycerol--inositol 3-phosphatidyltransferase [Mus musculus]                   | 24  |
| 1445.1 | GI:27754130  | Fam213b       | NP_079858.2    | <u>1</u> | 6.64 | <u>1</u> | 1 | 0 | 0 | prostamide/prostaglandin F synthase [Mus musculus]                                      | 22  |
| 1447.1 | GI:27734072  | Rbmx2         | NP_775552.1    | <u>1</u> | 6.64 | <u>1</u> | 1 | 0 | 0 | RNA-binding motif protein, X-linked 2 [Mus musculus]                                    | 38  |
| 1449.1 | GI:27369936  | Kctd3         | NP_766238.1    | <u>1</u> | 6.64 | <u>1</u> | 1 | 0 | 0 | BTB/POZ domain-containing protein KCTD3 [Mus musculus]                                  | 89  |
| 1451.1 | GI:27229185  | Tm9sf1        | NP_083056.2    | <u>1</u> | 6.64 | <u>1</u> | 1 | 0 | 0 | transmembrane 9 superfamily member 1 precursor [Mus musculus]                           | 69  |
| 1459.1 | GI:257467657 | D630045J12Rik | NP_918950.2    | <u>1</u> | 6.64 | <u>1</u> | 1 | 0 | 0 | UPF0606 protein KIAA1549 precursor [Mus musculus]                                       | 209 |
| 1462.1 | GI:256773279 | Ablim3        | NP_001157963.1 | <u>1</u> | 6.64 | 2        | 2 | 0 | 0 | actin-binding LIM protein 3 [Mus musculus]                                              | 78  |
| 1464.1 | GI:255522933 | Nlr1          | NP_001157214.1 | <u>1</u> | 6.64 | <u>1</u> | 1 | 0 | 0 | NLR family member X1 [Mus musculus]                                                     | 108 |
| 1465.1 | GI:255069715 | Lap3          | NP_077754.3    | <u>1</u> | 6.64 | <u>1</u> | 1 | 0 | 0 | cytosol aminopeptidase [Mus musculus]                                                   | 56  |
| 1467.1 | GI:254675300 | Numa1         | NP_598708.3    | <u>1</u> | 6.64 | <u>1</u> | 1 | 0 | 0 | nuclear mitotic apparatus protein 1 [Mus musculus]                                      | 235 |
| 1468.1 | GI:254587947 | Ppp2r4        | NP_620087.3    | <u>1</u> | 6.64 | <u>1</u> | 1 | 0 | 0 | serine/threonine-protein phosphatase 2A activator [Mus musculus]                        | 37  |
| 1470.1 | GI:254540162 | Pcca          | NP_659093.2    | <u>1</u> | 6.64 | <u>1</u> | 1 | 0 | 0 | propionyl-CoA carboxylase alpha chain, mitochondrial precursor [Mus musculus]           | 80  |
| 1471.1 | GI:254281341 | Agpat1        | NP_001156851.1 | <u>1</u> | 6.64 | <u>1</u> | 1 | 0 | 0 | 1-acyl-sn-glycerol-3-phosphate acyltransferase alpha isoform 1 precursor [Mus musculus] | 32  |
| 1472.1 | GI:253683505 | Begain        | NP_001156647.1 | <u>1</u> | 6.64 | <u>1</u> | 1 | 0 | 0 | brain-enriched guanylate kinase-associated protein [Mus musculus]                       | 67  |
| 1480.1 | GI:229576815 | Ccdc85c       | NP_001153382.1 | <u>1</u> | 6.64 | <u>1</u> | 1 | 0 | 0 | coiled-coil domain-containing protein 85C [Mus musculus]                                | 45  |
| 1485.1 | GI:226958422 | Pacsin2       | NP_001152982.1 | <u>1</u> | 6.64 | <u>1</u> | 1 | 0 | 0 | protein kinase C and casein kinase substrate in neurons protein 2 [Mus musculus]        | 56  |
| 1487.1 | GI:226823269 | Cep97         | NP_001152836.1 | <u>1</u> | 6.64 | <u>1</u> | 1 | 0 | 0 | centrosomal protein of 97 kDa isoform 2 [Mus musculus]                                  | 17  |
| 1493.1 | GI:22507341  | Tpgs1         | NP_683736.1    | <u>1</u> | 6.64 | <u>1</u> | 1 | 0 | 0 | tubulin polyglutamylase complex subunit 1 [Mus musculus]                                | 33  |
| 1496.1 | GI:22165382  | Csnk1a1       | NP_666199.1    | <u>1</u> | 6.64 | <u>1</u> | 1 | 0 | 0 | casein kinase I isoform alpha [Mus musculus]                                            | 38  |

|        |              |            |                |          |      |          |   |   |   |                                                                                            |     |
|--------|--------------|------------|----------------|----------|------|----------|---|---|---|--------------------------------------------------------------------------------------------|-----|
| 1498.1 | GI:21703784  | Bag2       | NP_663367.1    | <u>1</u> | 6.64 | <u>1</u> | 1 | 0 | 0 | BAG family molecular chaperone regulator 2 [Mus musculus]                                  | 23  |
| 1499.1 | GI:21703762  | Eif3m      | NP_663355.1    | <u>1</u> | 6.64 | <u>2</u> | 2 | 0 | 0 | eukaryotic translation initiation factor 3 subunit M [Mus musculus]                        | 42  |
| 1501.1 | GI:21539599  | Uqcrh      | NP_079917.1    | <u>1</u> | 6.64 | <u>2</u> | 2 | 0 | 0 | cytochrome b-c1 complex subunit 6, mitochondrial [Mus musculus]                            | 10  |
| 1503.1 | GI:21359820  | Mb         | NP_038621.2    | <u>1</u> | 6.64 | <u>1</u> | 1 | 0 | 0 | myoglobin [Mus musculus]                                                                   | 17  |
| 1504.1 | GI:21313504  | Gins3      | NP_084474.1    | <u>1</u> | 6.64 | <u>1</u> | 1 | 0 | 0 | DNA replication complex GINS protein PSF3 [Mus musculus]                                   | 25  |
| 1506.1 | GI:21312776  | Tprgl      | NP_080664.1    | <u>1</u> | 6.64 | <u>1</u> | 1 | 0 | 0 | tumor protein p63-regulated gene 1-like protein [Mus musculus]                             | 30  |
| 1508.1 | GI:21312752  | Mrrf       | NP_080698.1    | <u>1</u> | 6.64 | <u>1</u> | 1 | 0 | 0 | ribosome-recycling factor, mitochondrial precursor [Mus musculus]                          | 29  |
| 1518.1 | GI:19526884  | Gmppa      | NP_598469.1    | <u>1</u> | 6.64 | <u>1</u> | 1 | 0 | 0 | mannose-1-phosphate guanyltransferase alpha [Mus musculus]                                 | 46  |
| 1519.1 | GI:194353972 | Ptk2       | NP_032008.2    | <u>1</u> | 6.64 | <u>2</u> | 2 | 0 | 0 | focal adhesion kinase 1 isoform 1 [Mus musculus]                                           | 119 |
| 1521.1 | GI:19387848  | Ict1       | NP_081005.1    | <u>1</u> | 6.64 | <u>1</u> | 1 | 0 | 0 | peptidyl-tRNA hydrolase ICT1, mitochondrial [Mus musculus]                                 | 20  |
| 1527.1 | GI:18017602  | Sh3bgrl3   | NP_542126.1    | <u>1</u> | 6.64 | <u>1</u> | 1 | 0 | 0 | SH3 domain-binding glutamic acid-rich-like protein 3 [Mus musculus]                        | 10  |
| 1530.1 | GI:171543858 | Hmgcl      | NP_032280.2    | <u>1</u> | 6.64 | <u>1</u> | 1 | 0 | 0 | hydroxymethylglutaryl-CoA lyase, mitochondrial precursor [Mus musculus]                    | 34  |
| 1531.1 | GI:171543841 | Fyn        | NP_001116365.1 | <u>1</u> | 6.64 | <u>1</u> | 1 | 0 | 0 | tyrosine-protein kinase Fyn isoform a [Mus musculus]                                       | 61  |
| 1532.1 | GI:171184435 | Ptplad1    | NP_067320.2    | <u>1</u> | 6.64 | <u>1</u> | 1 | 0 | 0 | very-long-chain (3R)-3-hydroxyacyl-[acyl-carrier protein] dehydratase 3 [Mus musculus]     | 43  |
| 1533.1 | GI:170763467 | Timm44     | NP_035722.2    | <u>1</u> | 6.64 | <u>1</u> | 1 | 0 | 0 | mitochondrial import inner membrane translocase subunit TIM44 [Mus musculus]               | 51  |
| 1534.1 | GI:170295814 | D3Bwg0562e | NP_808332.3    | <u>1</u> | 6.64 | <u>1</u> | 1 | 0 | 0 | lipid phosphate phosphatase-related protein type 4 [Mus musculus]                          | 83  |
| 1540.1 | GI:165972329 | Lin54      | NP_766302.2    | <u>1</u> | 6.64 | <u>1</u> | 1 | 0 | 0 | protein lin-54 homolog [Mus musculus]                                                      | 80  |
| 1542.1 | GI:162417988 | Gpr371l    | NP_602320.2    | <u>1</u> | 6.64 | <u>1</u> | 1 | 0 | 0 | endothelin B receptor-like protein 2 precursor [Mus musculus]                              | 53  |
| 1546.1 | GI:160333885 | Camk2n2    | NP_082696.1    | <u>1</u> | 6.64 | <u>1</u> | 1 | 0 | 0 | calcium/calmodulin-dependent protein kinase II inhibitor 2 [Mus musculus]                  | 9   |
| 1548.1 | GI:160333372 | Lum        | NP_032550.2    | <u>1</u> | 6.64 | <u>1</u> | 1 | 0 | 0 | lumican precursor [Mus musculus]                                                           | 38  |
| 1552.1 | GI:158631246 | Ndufb11    | NP_062308.2    | <u>1</u> | 6.64 | <u>1</u> | 1 | 0 | 0 | NADH dehydrogenase [ubiquinone] 1 beta subcomplex subunit 11, mitochondrial [Mus musculus] | 17  |
| 1556.1 | GI:153792001 | Ranbp1     | NP_035369.2    | <u>1</u> | 6.64 | <u>1</u> | 1 | 0 | 0 | ran-specific GTPase-activating protein [Mus musculus]                                      | 24  |
| 1557.1 | GI:153791731 | Pnmal2     | NP_001093106.1 | <u>1</u> | 6.64 | <u>1</u> | 1 | 0 | 0 | PNMA-like protein 2 [Mus musculus]                                                         | 72  |
| 1559.1 | GI:148229140 | Arfgef2    | NP_001078964.1 | <u>1</u> | 6.64 | <u>1</u> | 1 | 0 | 0 | brefeldin A-inhibited guanine nucleotide-exchange protein 2 [Mus musculus]                 | 202 |
| 1561.1 | GI:146134449 | Med13l     | NP_766012.3    | <u>1</u> | 6.64 | <u>1</u> | 1 | 0 | 0 | mediator of RNA polymerase II transcription subunit 13-like [Mus musculus]                 | 242 |
| 1563.1 | GI:145279233 | Ctif       | NP_958742.2    | <u>1</u> | 6.64 | <u>1</u> | 1 | 0 | 0 | CBP80/20-dependent translation initiation factor [Mus musculus]                            | 70  |
| 1566.1 | GI:134288898 | Herc2      | NP_034548.2    | <u>1</u> | 6.64 | <u>1</u> | 1 | 0 | 0 | E3 ubiquitin-protein ligase HERC2 [Mus musculus]                                           | 527 |
| 1568.1 | GI:13386100  | Ndufa5     | NP_080890.1    | <u>1</u> | 6.64 | <u>1</u> | 1 | 0 | 0 | NADH dehydrogenase [ubiquinone] 1 alpha subcomplex subunit 5 [Mus musculus]                | 13  |
| 1569.1 | GI:13386066  | Gcsh       | NP_080848.1    | <u>1</u> | 6.64 | <u>1</u> | 1 | 0 | 0 | glycine cleavage system H protein, mitochondrial precursor [Mus musculus]                  | 19  |
| 1579.1 | GI:13385536  | Armc10     | NP_080310.1    | <u>1</u> | 6.64 | <u>1</u> | 1 | 0 | 0 | armadillo repeat-containing protein 10 [Mus musculus]                                      | 33  |

|        |              |               |                |          |      |          |   |   |   |                                                                              |     |
|--------|--------------|---------------|----------------|----------|------|----------|---|---|---|------------------------------------------------------------------------------|-----|
| 1580.1 | GI:13385492  | Ndufa6        | NP_080263.1    | <u>1</u> | 6.64 | <u>1</u> | 1 | 0 | 0 | NADH dehydrogenase [ubiquinone] 1 alpha subcomplex subunit 6 [Mus musculus]  | 15  |
| 1581.1 | GI:13385294  | Pcyox1        | NP_080099.1    | <u>1</u> | 6.64 | <u>1</u> | 1 | 0 | 0 | prenylcysteine oxidase precursor [Mus musculus]                              | 56  |
| 1587.1 | GI:131888529 | Gabbr1        | NP_062312.3    | <u>1</u> | 6.64 | <u>2</u> | 2 | 0 | 0 | gamma-aminobutyric acid type B receptor subunit 1 precursor [Mus musculus]   | 108 |
| 1588.1 | GI:12963791  | Rdh14         | NP_076186.1    | <u>1</u> | 6.64 | <u>1</u> | 1 | 0 | 0 | retinol dehydrogenase 14 [Mus musculus]                                      | 36  |
| 1590.1 | GI:12963633  | Ndufa13       | NP_075801.1    | <u>1</u> | 6.64 | <u>2</u> | 2 | 0 | 0 | NADH dehydrogenase [ubiquinone] 1 alpha subcomplex subunit 13 [Mus musculus] | 17  |
| 1592.1 | GI:126506316 | 9430020K01Rik | NP_001075432.1 | <u>1</u> | 6.64 | <u>1</u> | 1 | 0 | 0 | junctional protein associated with coronary artery disease [Mus musculus]    | 145 |
| 1599.1 | GI:124487003 | 6330403A02Rik | NP_001074696.1 | <u>1</u> | 6.64 | <u>1</u> | 1 | 0 | 0 | uncharacterized membrane protein C1orf95 homolog [Mus musculus]              | 15  |
| 1600.1 | GI:124486895 | Pgd           | NP_001074743.1 | <u>1</u> | 6.64 | <u>1</u> | 1 | 0 | 0 | 6-phosphogluconate dehydrogenase, decarboxylating [Mus musculus]             | 53  |
| 1601.1 | GI:124486747 | Agl           | NP_001074795.1 | <u>1</u> | 6.64 | <u>1</u> | 1 | 0 | 0 | glycogen debranching enzyme [Mus musculus]                                   | 174 |
| 1604.1 | GI:124358959 | Taok1         | NP_659074.2    | <u>1</u> | 6.64 | <u>2</u> | 2 | 0 | 0 | serine/threonine-protein kinase TAO1 [Mus musculus]                          | 116 |
| 1605.1 | GI:124358946 | Dock5         | NP_808448.2    | <u>1</u> | 6.64 | <u>1</u> | 1 | 0 | 0 | dedicator of cytokinesis protein 5 [Mus musculus]                            | 214 |
| 1607.1 | GI:124249202 | Cdh10         | NP_033995.1    | <u>1</u> | 6.64 | <u>1</u> | 1 | 0 | 0 | cadherin-10 precursor [Mus musculus]                                         | 88  |
| 1609.1 | GI:124248572 | Vbp1          | NP_035822.2    | <u>1</u> | 6.64 | <u>1</u> | 1 | 0 | 0 | prefoldin subunit 3 [Mus musculus]                                           | 22  |
| 1611.1 | GI:124001551 | Tgm3          | NP_033400.2    | <u>1</u> | 6.64 | <u>1</u> | 1 | 0 | 0 | protein-glutamine gamma-glutamyltransferase E [Mus musculus]                 | 77  |
| 1612.1 | GI:123702001 | Wdr41         | NP_766178.2    | <u>1</u> | 6.64 | <u>1</u> | 1 | 0 | 0 | WD repeat-containing protein 41 [Mus musculus]                               | 51  |
| 1613.1 | GI:120537241 | Lars          | NP_598898.2    | <u>1</u> | 6.64 | <u>1</u> | 1 | 0 | 0 | leucine--tRNA ligase, cytoplasmic [Mus musculus]                             | 134 |
| 1616.1 | GI:118150658 | NdrG1         | NP_032707.2    | <u>1</u> | 6.64 | <u>1</u> | 1 | 0 | 0 | protein NDRG1 [Mus musculus]                                                 | 43  |
| 1617.1 | GI:117606385 | Tmx3          | NP_938037.2    | <u>1</u> | 6.64 | <u>1</u> | 1 | 0 | 0 | protein disulfide-isomerase TMX3 precursor [Mus musculus]                    | 52  |
| 1618.1 | GI:116089318 | Daam2         | NP_001008232.2 | <u>1</u> | 6.64 | <u>1</u> | 1 | 0 | 0 | disheveled-associated activator of morphogenesis 2 [Mus musculus]            | 128 |
| 1620.1 | GI:11496255  | Dnaja4        | NP_067397.1    | <u>1</u> | 6.64 | <u>1</u> | 1 | 0 | 0 | dnaJ homolog subfamily A member 4 [Mus musculus]                             | 45  |
| 1623.1 | GI:113205059 | Ybx1          | NP_035862.2    | <u>1</u> | 6.64 | <u>1</u> | 1 | 0 | 0 | nuclease-sensitive element-binding protein 1 [Mus musculus]                  | 36  |
| 1624.1 | GI:112817607 | Tmx4          | NP_083424.1    | <u>1</u> | 6.64 | <u>1</u> | 1 | 0 | 0 | thioredoxin-related transmembrane protein 4 precursor [Mus musculus]         | 37  |
| 1626.1 | GI:110835706 | Plekha5       | NP_659169.3    | <u>1</u> | 6.64 | <u>1</u> | 1 | 0 | 0 | phosphoinositol 3-phosphate-binding protein-2 [Mus musculus]                 | 144 |
| 1627.1 | GI:110835702 | Cc2d1a        | NP_666082.2    | <u>1</u> | 6.64 | <u>1</u> | 1 | 0 | 0 | coiled-coil and C2 domain-containing protein 1A [Mus musculus]               | 104 |
| 1630.1 | GI:10946578  | Tmsb4x        | NP_067253.1    | <u>1</u> | 6.64 | <u>1</u> | 1 | 0 | 0 | thymosin beta-4 [Mus musculus]                                               | 5   |
| 1632.1 | GI:10181148  | Nrip3         | NP_065635.1    | <u>1</u> | 6.64 | <u>1</u> | 1 | 0 | 0 | nuclear receptor-interacting protein 3 [Mus musculus]                        | 27  |
| 1633.1 | GI:100817933 | Acad9         | NP_766266.3    | <u>1</u> | 6.64 | <u>1</u> | 1 | 0 | 0 | acyl-CoA dehydrogenase family member 9, mitochondrial [Mus musculus]         | 69  |
| 1635.1 | GI:9790261   | Tfg           | NP_062652.1    | <u>1</u> | 6.64 | <u>1</u> | 1 | 0 | 0 | protein TFG isoform 1 [Mus musculus]                                         | 43  |
| 1638.1 | GI:9055166   | Arc           | NP_061260.1    | <u>1</u> | 6.64 | <u>1</u> | 1 | 0 | 0 | activity-regulated cytoskeleton-associated protein [Mus musculus]            | 45  |
| 1641.1 | GI:84662727  | Fn3k          | NP_001033788.1 | <u>1</u> | 6.64 | <u>1</u> | 1 | 0 | 0 | fructosamine-3-kinase isoform b [Mus musculus]                               | 23  |

|        |              |              |                |          |      |          |   |   |   |                                                                                          |     |
|--------|--------------|--------------|----------------|----------|------|----------|---|---|---|------------------------------------------------------------------------------------------|-----|
| 1642.1 | GI:84452155  | Usp14        | NP_001033678.1 | <u>1</u> | 6.64 | <u>1</u> | 1 | 0 | 0 | ubiquitin carboxyl-terminal hydrolase 14 isoform 2 [Mus musculus]                        | 52  |
| 1643.1 | GI:84370357  | Olfm1        | NP_062371.2    | <u>1</u> | 6.64 | <u>1</u> | 1 | 0 | 0 | noelin isoform a precursor [Mus musculus]                                                | 55  |
| 1644.1 | GI:8393749   | Mapk9        | NP_058657.1    | <u>1</u> | 6.64 | <u>1</u> | 1 | 0 | 0 | mitogen-activated protein kinase 9 isoform beta1 [Mus musculus]                          | 44  |
| 1645.1 | GI:8393739   | Lyz2         | NP_059068.1    | <u>1</u> | 6.64 | <u>1</u> | 1 | 0 | 0 | lysozyme C-2 precursor [Mus musculus]                                                    | 17  |
| 1646.1 | GI:83627687  | Timm8a2      | NP_001032833.1 | <u>1</u> | 6.64 | <u>1</u> | 1 | 0 | 0 | putative mitochondrial import inner membrane translocase subunit Tim8 A-B [Mus musculus] | 11  |
| 1647.1 | GI:82950935  | Gm5792       | XP_619114.2    | <u>1</u> | 6.64 | <u>2</u> | 2 | 0 | 0 | PREDICTED: chromobox protein homolog 3-like [Mus musculus]                               | 21  |
| 1649.1 | GI:7949125   | Rundc3a      | NP_058039.1    | <u>1</u> | 6.64 | <u>1</u> | 1 | 0 | 0 | RUN domain-containing protein 3A isoform 1 [Mus musculus]                                | 50  |
| 1654.1 | GI:7110693   | Prkaca       | NP_032880.1    | <u>1</u> | 6.64 | <u>1</u> | 1 | 0 | 0 | cAMP-dependent protein kinase catalytic subunit alpha isoform 1 [Mus musculus]           | 41  |
| 1656.1 | GI:71040107  | Cadm1        | NP_001020771.1 | <u>1</u> | 6.64 | <u>1</u> | 1 | 0 | 0 | cell adhesion molecule 1 isoform d precursor [Mus musculus]                              | 46  |
| 1659.1 | GI:68342040  | Tmem201      | NP_808340.2    | <u>1</u> | 6.64 | <u>1</u> | 1 | 0 | 0 | transmembrane protein 201 isoform b [Mus musculus]                                       | 44  |
| 1664.1 | GI:6754816   | Sept2        | NP_035021.1    | <u>1</u> | 6.64 | <u>1</u> | 1 | 0 | 0 | septin-2 isoform a [Mus musculus]                                                        | 42  |
| 1667.1 | GI:6753022   | Ak4          | NP_033777.1    | <u>1</u> | 6.64 | <u>1</u> | 1 | 0 | 0 | adenylate kinase 4, mitochondrial [Mus musculus]                                         | 25  |
| 1669.1 | GI:6679671   | Eps15        | NP_031969.1    | <u>1</u> | 6.64 | <u>1</u> | 1 | 0 | 0 | epidermal growth factor receptor substrate 15 isoform A [Mus musculus]                   | 98  |
| 1670.1 | GI:66792792  | Bcat1        | NP_001019639.1 | <u>1</u> | 6.64 | <u>1</u> | 2 | 0 | 0 | branched-chain-amino-acid aminotransferase, cytosolic isoform 1 [Mus musculus]           | 50  |
| 1674.1 | GI:6677819   | Rras         | NP_033127.1    | <u>1</u> | 6.64 | <u>1</u> | 1 | 0 | 0 | ras-related protein R-Ras precursor [Mus musculus]                                       | 24  |
| 1677.1 | GI:58331156  | Gspt2        | NP_032205.2    | <u>1</u> | 6.64 | <u>1</u> | 1 | 0 | 0 | eukaryotic peptide chain release factor GTP-binding subunit ERF3B [Mus musculus]         | 69  |
| 1678.1 | GI:555943852 | Nadk2        | NP_001273184.1 | <u>1</u> | 6.64 | <u>1</u> | 1 | 0 | 0 | NAD kinase 2, mitochondrial isoform 4 [Mus musculus]                                     | 45  |
| 1680.1 | GI:545687724 | Rad17        | NP_001269940.1 | <u>1</u> | 6.64 | <u>1</u> | 1 | 0 | 0 | cell cycle checkpoint protein RAD17 isoform 2 [Mus musculus]                             | 54  |
| 1681.1 | GI:530788257 | Lrrtm4       | NP_001269031.1 | <u>1</u> | 6.64 | <u>1</u> | 1 | 0 | 0 | leucine-rich repeat transmembrane neuronal protein 4 isoform 2 precursor [Mus musculus]  | 59  |
| 1682.1 | GI:530678008 | Rgs6         | NP_001268990.1 | <u>1</u> | 6.64 | <u>1</u> | 1 | 0 | 0 | regulator of G-protein signaling 6 [Mus musculus]                                        | 54  |
| 1684.1 | GI:47059484  | Rbbp4        | NP_033056.2    | <u>1</u> | 6.64 | <u>1</u> | 1 | 0 | 0 | histone-binding protein RBBP4 [Mus musculus]                                             | 48  |
| 1687.1 | GI:459215046 | Gas7         | NP_001264009.1 | <u>1</u> | 6.64 | <u>1</u> | 1 | 0 | 0 | growth arrest-specific protein 7 isoform d [Mus musculus]                                | 41  |
| 1694.1 | GI:407261991 | Gm5068       | XP_003085870.2 | <u>1</u> | 6.64 | <u>1</u> | 1 | 0 | 0 | PREDICTED: protein S100-A11-like [Mus musculus]                                          | 15  |
| 1696.1 | GI:407260973 | LOC101056616 | XP_003946114.1 | <u>1</u> | 6.64 | <u>1</u> | 1 | 0 | 0 | PREDICTED: transcription elongation factor B polypeptide 1-like [Mus musculus]           | 12  |
| 1700.1 | GI:359279956 | Anp32e       | NP_001240686.1 | <u>1</u> | 6.64 | <u>1</u> | 1 | 0 | 0 | acidic leucine-rich nuclear phosphoprotein 32 family member E isoform 2 [Mus musculus]   | 28  |
| 1701.1 | GI:34328385  | Prrc2b       | NP_766249.2    | <u>1</u> | 6.64 | <u>1</u> | 1 | 0 | 0 | protein PRC2B isoform 2 [Mus musculus]                                                   | 161 |
| 1707.1 | GI:31982373  | Fbl          | NP_032017.2    | <u>1</u> | 6.64 | <u>2</u> | 2 | 0 | 0 | rRNA 2'-O-methyltransferase fibrillarlin [Mus musculus]                                  | 34  |
| 1712.1 | GI:310772196 | Map7         | NP_001185564.1 | <u>1</u> | 6.64 | <u>1</u> | 1 | 0 | 0 | ensconsin isoform 2 [Mus musculus]                                                       | 83  |
| 1713.1 | GI:309262615 | Mcg1038069   | XP_001475660.2 | <u>1</u> | 6.64 | <u>2</u> | 2 | 0 | 0 | PREDICTED: ubiquitin-conjugating enzyme E2 N [Mus musculus]                              | 23  |
| 1716.1 | GI:29725637  | Kctd10       | NP_080421.2    | <u>1</u> | 6.64 | <u>1</u> | 1 | 0 | 0 | BTB/POZ domain-containing adapter for CUL3-mediated RhoA degradation protein 3 isoform 2 | 36  |

|        |              |                    |                |          |         |          |   |   |   |                                                                                            |     |
|--------|--------------|--------------------|----------------|----------|---------|----------|---|---|---|--------------------------------------------------------------------------------------------|-----|
|        |              |                    |                |          |         |          |   |   |   | [Mus musculus]                                                                             |     |
| 1721.1 | GI:27734112  | 9930111J<br>21Rik2 | NP_775610.1    | <u>1</u> | 6.64    | <u>1</u> | 1 | 0 | 0 | interferon inducible GTPase [Mus musculus]                                                 | 52  |
| 1728.1 | GI:257096028 | Spats2l            | NP_001158038.1 | <u>1</u> | 6.64    | <u>1</u> | 1 | 0 | 0 | SPATS2-like protein isoform 2 [Mus musculus]                                               | 62  |
| 1731.1 | GI:255958294 | Aldh18a1           | NP_705782.2    | <u>1</u> | 6.64    | <u>1</u> | 1 | 0 | 0 | delta-1-pyrroline-5-carboxylate synthase isoform 2 [Mus musculus]                          | 87  |
| 1732.1 | GI:254826788 | Cacna1h            | NP_001157163.1 | <u>1</u> | 6.64    | <u>1</u> | 1 | 0 | 0 | voltage-dependent T-type calcium channel subunit alpha-1H isoform 2 [Mus musculus]         | 224 |
| 1733.1 | GI:254692873 | Tars2              | NP_001157091.1 | <u>1</u> | 6.64    | <u>1</u> | 1 | 0 | 0 | threonine--tRNA ligase, mitochondrial isoform 4 [Mus musculus]                             | 48  |
| 1737.1 | GI:251823891 | Hars               | NP_032240.3    | <u>1</u> | 6.64    | <u>1</u> | 1 | 0 | 0 | histidine--tRNA ligase, cytoplasmic [Mus musculus]                                         | 57  |
| 1740.1 | GI:238231425 | Krt35              | NP_058576.2    | <u>1</u> | 6.64    | <u>1</u> | 1 | 0 | 0 | keratin, type I cuticular Ha5 [Mus musculus]                                               | 50  |
| 1744.1 | GI:225637535 | Nrcam              | NP_001139503.1 | <u>1</u> | 6.64    | <u>1</u> | 1 | 0 | 0 | neuronal cell adhesion molecule isoform 2 precursor [Mus musculus]                         | 131 |
| 1746.1 | GI:224922843 | Stk40              | NP_001139299.1 | <u>1</u> | 6.64    | <u>1</u> | 1 | 0 | 0 | serine/threonine-protein kinase 40 isoform a [Mus musculus]                                | 51  |
| 1748.1 | GI:190684707 | Pced1a             | NP_848877.2    | <u>1</u> | 6.64    | <u>1</u> | 1 | 0 | 0 | PC-esterase domain-containing protein 1A [Mus musculus]                                    | 51  |
| 1761.1 | GI:127139524 | Trim21             | NP_001076021.1 | <u>1</u> | 6.64    | <u>1</u> | 1 | 0 | 0 | E3 ubiquitin-protein ligase TRIM21 [Mus musculus]                                          | 53  |
| 29.3   | GI:256985123 | Syn3               | NP_038750.2    | <u>2</u> | #DIV/O! | 0        | 0 | 0 | 0 | synapsin-3 isoform 1 [Mus musculus]                                                        | 63  |
| 846.1  | GI:23956096  | Uso1               | NP_062363.1    | <u>3</u> | #DIV/O! | 0        | 0 | 0 | 0 | general vesicular transport factor p115 [Mus musculus]                                     | 107 |
| 904.1  | GI:118344452 | Srp72              | NP_079967.1    | <u>3</u> | #DIV/O! | 0        | 0 | 0 | 0 | signal recognition particle 72 [Mus musculus]                                              | 75  |
| 1005.1 | GI:82546887  | Radil              | NP_848817.2    | <u>2</u> | #DIV/O! | 0        | 0 | 0 | 0 | ras-associating and dilute domain-containing protein [Mus musculus]                        | 117 |
| 1029.1 | GI:6753488   | Cops3              | NP_036121.1    | <u>2</u> | #DIV/O! | 0        | 0 | 0 | 0 | COP9 signalosome complex subunit 3 [Mus musculus]                                          | 48  |
| 1042.1 | GI:55925589  | Prpf4              | NP_081573.1    | <u>2</u> | #DIV/O! | 0        | 0 | 0 | 0 | U4/U6 small nuclear ribonucleoprotein Prp4 [Mus musculus]                                  | 58  |
| 1132.1 | GI:22003884  | Irf2bpl            | NP_665835.1    | <u>2</u> | #DIV/O! | 0        | 0 | 0 | 0 | interferon regulatory factor 2-binding protein-like [Mus musculus]                         | 81  |
| 1154.1 | GI:18875400  | Khdrbs2            | NP_573498.1    | <u>2</u> | #DIV/O! | 0        | 0 | 0 | 0 | KH domain-containing, RNA-binding, signal transduction-associated protein 2 [Mus musculus] | 39  |
| 1165.1 | GI:163644255 | Hecw1              | NP_001074817.3 | <u>2</u> | #DIV/O! | 0        | 0 | 0 | 0 | E3 ubiquitin-protein ligase HECW1 [Mus musculus]                                           | 179 |
| 1181.1 | GI:154091036 | Dagla              | NP_932782.2    | <u>2</u> | #DIV/O! | 0        | 0 | 0 | 0 | sn1-specific diacylglycerol lipase alpha [Mus musculus]                                    | 115 |
| 1213.1 | GI:6755781   | Thbs4              | NP_035712.1    | <u>2</u> | #DIV/O! | 0        | 0 | 0 | 0 | thrombospondin-4 precursor [Mus musculus]                                                  | 106 |
| 1225.1 | GI:15011841  | Gpx3               | NP_032187.2    | <u>2</u> | #DIV/O! | 0        | 0 | 0 | 0 | glutathione peroxidase 3 precursor [Mus musculus]                                          | 25  |
| 1244.1 | GI:6755847   | Tom1               | NP_035752.1    | <u>2</u> | #DIV/O! | 0        | 0 | 0 | 0 | target of Myb protein 1 isoform 1 [Mus musculus]                                           | 54  |
| 1300.1 | GI:9790131   | Slc22a21           | NP_062697.1    | <u>1</u> | #DIV/O! | 0        | 0 | 0 | 0 | solute carrier family 22 member 21 [Mus musculus]                                          | 63  |
| 1311.1 | GI:84370312  | Arhgef9            | NP_001028501.1 | <u>1</u> | #DIV/O! | 0        | 0 | 0 | 0 | rho guanine nucleotide exchange factor 9 [Mus musculus]                                    | 61  |
| 1319.1 | GI:74229034  | Ipo7               | NP_852658.2    | <u>1</u> | #DIV/O! | 0        | 0 | 0 | 0 | importin-7 [Mus musculus]                                                                  | 119 |
| 1323.1 | GI:71361678  | Pmch               | NP_084247.1    | <u>1</u> | #DIV/O! | 0        | 0 | 0 | 0 | pro-MCH preproprotein [Mus musculus]                                                       | 19  |
| 1324.1 | GI:7110703   | Psmc5              | NP_032976.1    | <u>1</u> | #DIV/O! | 0        | 0 | 0 | 0 | 26S protease regulatory subunit 8 [Mus musculus]                                           | 46  |



|        |              |          |                |          |         |   |   |   |   |                                                                                                                     |     |
|--------|--------------|----------|----------------|----------|---------|---|---|---|---|---------------------------------------------------------------------------------------------------------------------|-----|
| 1340.1 | GI:6753964   | Gdap1    | NP_034397.1    | <u>1</u> | #DIV/O! | 0 | 0 | 0 | 0 | ganglioside-induced differentiation-associated protein 1 [Mus musculus]                                             | 41  |
| 1350.1 | GI:6679731   | F5       | NP_032002.1    | <u>1</u> | #DIV/O! | 0 | 0 | 0 | 0 | coagulation factor V precursor [Mus musculus]                                                                       | 247 |
| 1353.1 | GI:6679523   | Pten     | NP_032986.1    | <u>1</u> | #DIV/O! | 0 | 0 | 0 | 0 | phosphatidylinositol 3,4,5-trisphosphate 3-phosphatase and dual-specificity protein phosphatase PTEN [Mus musculus] | 47  |
| 1370.1 | GI:58037475  | Fam81a   | NP_084060.1    | <u>1</u> | #DIV/O! | 0 | 0 | 0 | 0 | protein FAM81A [Mus musculus]                                                                                       | 42  |
| 1371.1 | GI:58037409  | Phpt1    | NP_083569.1    | <u>1</u> | #DIV/O! | 0 | 0 | 0 | 0 | 14 kDa phosphohistidine phosphatase [Mus musculus]                                                                  | 14  |
| 1380.1 | GI:54145496  | Ppp6r2   | NP_081089.1    | <u>1</u> | #DIV/O! | 0 | 0 | 0 | 0 | serine/threonine-protein phosphatase 6 regulatory subunit 2 isoform 1 [Mus musculus]                                | 100 |
| 1387.1 | GI:40254163  | Mff      | NP_083685.2    | <u>1</u> | #DIV/O! | 0 | 0 | 0 | 0 | mitochondrial fission factor [Mus musculus]                                                                         | 33  |
| 1393.1 | GI:37718970  | A1314180 | NP_759013.2    | <u>1</u> | #DIV/O! | 0 | 0 | 0 | 0 | proteasome-associated protein ECM29 homolog [Mus musculus]                                                          | 204 |
| 1402.1 | GI:34328319  | Pcdh1    | NP_083633.2    | <u>1</u> | #DIV/O! | 0 | 0 | 0 | 0 | protocadherin-1 precursor [Mus musculus]                                                                            | 112 |
| 1405.1 | GI:33859801  | Fbxo2    | NP_789818.1    | <u>1</u> | #DIV/O! | 0 | 0 | 0 | 0 | F-box only protein 2 [Mus musculus]                                                                                 | 34  |
| 1411.1 | GI:323462206 | Dip2c    | NP_001074895.2 | <u>1</u> | #DIV/O! | 0 | 0 | 0 | 0 | disco-interacting protein 2 homolog C [Mus musculus]                                                                | 171 |
| 1431.1 | GI:305410882 | Dos      | NP_001182197.1 | <u>1</u> | #DIV/O! | 0 | 0 | 0 | 0 | protein Dos [Mus musculus]                                                                                          | 74  |
| 1444.1 | GI:27777683  | Gramd1b  | NP_766356.1    | <u>1</u> | #DIV/O! | 0 | 0 | 0 | 0 | GRAM domain-containing protein 1B [Mus musculus]                                                                    | 101 |
| 1446.1 | GI:27753958  | Spata2l  | NP_084452.2    | <u>1</u> | #DIV/O! | 0 | 0 | 0 | 0 | spermatogenesis-associated protein 2-like protein [Mus musculus]                                                    | 47  |
| 1456.1 | GI:261245037 | Hhipl2   | NP_084451.2    | <u>1</u> | #DIV/O! | 0 | 0 | 0 | 0 | HHIP-like protein 2 precursor [Mus musculus]                                                                        | 80  |
| 1457.1 | GI:261245016 | Myh15    | NP_001159682.1 | <u>1</u> | #DIV/O! | 0 | 0 | 0 | 0 | myosin-15 [Mus musculus]                                                                                            | 222 |
| 1475.1 | GI:242332593 | Lamtor1  | NP_079881.2    | <u>1</u> | #DIV/O! | 0 | 0 | 0 | 0 | regulator complex protein LAMTOR1 [Mus musculus]                                                                    | 18  |
| 1484.1 | GI:226958589 | Polr2b   | NP_722493.2    | <u>1</u> | #DIV/O! | 0 | 0 | 0 | 0 | DNA-directed RNA polymerase II subunit RPB2 [Mus musculus]                                                          | 134 |
| 1486.1 | GI:226874935 | Itih2    | NP_034712.2    | <u>1</u> | #DIV/O! | 0 | 0 | 0 | 0 | inter-alpha-trypsin inhibitor heavy chain H2 precursor [Mus musculus]                                               | 106 |
| 1490.1 | GI:225690610 | Plxnb1   | NP_766363.2    | <u>1</u> | #DIV/O! | 0 | 0 | 0 | 0 | plexin-B1 precursor [Mus musculus]                                                                                  | 231 |
| 1494.1 | GI:224922751 | Nav1     | NP_775613.2    | <u>1</u> | #DIV/O! | 0 | 0 | 0 | 0 | neuron navigator 1 [Mus musculus]                                                                                   | 202 |
| 1524.1 | GI:18699726  | Vps4a    | NP_569053.1    | <u>1</u> | #DIV/O! | 0 | 0 | 0 | 0 | vacuolar protein sorting-associated protein 4A [Mus musculus]                                                       | 49  |
| 1525.1 | GI:186659517 | Sema4c   | NP_001119519.1 | <u>1</u> | #DIV/O! | 0 | 0 | 0 | 0 | semaphorin-4C precursor [Mus musculus]                                                                              | 92  |
| 1545.1 | GI:160358823 | Cd5l     | NP_033820.2    | <u>1</u> | #DIV/O! | 0 | 0 | 0 | 0 | CD5 antigen-like precursor [Mus musculus]                                                                           | 39  |
| 1550.1 | GI:160333229 | Capn1    | NP_001103974.1 | <u>1</u> | #DIV/O! | 0 | 0 | 0 | 0 | calpain-1 catalytic subunit [Mus musculus]                                                                          | 82  |
| 1554.1 | GI:15431281  | Krt23    | NP_203537.1    | <u>1</u> | #DIV/O! | 0 | 0 | 0 | 0 | keratin, type I cytoskeletal 23 [Mus musculus]                                                                      | 48  |
| 1567.1 | GI:134152669 | Arglu1   | NP_789819.2    | <u>1</u> | #DIV/O! | 0 | 0 | 0 | 0 | arginine and glutamate-rich protein 1 [Mus musculus]                                                                | 33  |
| 1606.1 | GI:124301221 | Olf1062  | NP_667289.2    | <u>1</u> | #DIV/O! | 0 | 0 | 0 | 0 | olfactory receptor 1062 [Mus musculus]                                                                              | 36  |
| 1653.1 | GI:7110705   | Ptma     | NP_032998.1    | <u>1</u> | #DIV/O! | 0 | 0 | 0 | 0 | prothymosin alpha [Mus musculus]                                                                                    | 12  |
| 1655.1 | GI:71043944  | Snx1     | NP_062701.2    | <u>1</u> | #DIV/O! | 0 | 0 | 0 | 0 | sorting nexin-1 [Mus musculus]                                                                                      | 59  |
| 1662.1 | GI:6755228   | Ptpn11   | NP_035332.1    | <u>1</u> | #DIV/O! | 0 | 0 | 0 | 0 | tyrosine-protein phosphatase non-receptor type 11 isoform a [Mus musculus]                                          | 68  |

|        |              |           |                |          |         |   |   |   |   |                                                                                         |     |
|--------|--------------|-----------|----------------|----------|---------|---|---|---|---|-----------------------------------------------------------------------------------------|-----|
| 1686.1 | GI:46849812  | Fn1       | NP_034363.1    | <u>1</u> | #DIV/O! | 0 | 0 | 0 | 0 | fibronectin isoform a precursor [Mus musculus]                                          | 272 |
| 1691.1 | GI:407263397 | Gm6871    | XP_898188.6    | <u>1</u> | #DIV/O! | 0 | 0 | 0 | 0 | PREDICTED: zinc finger protein 120-like [Mus musculus]                                  | 59  |
| 1695.1 | GI:407261777 | LOC631286 | XP_003945900.1 | <u>1</u> | #DIV/O! | 0 | 0 | 0 | 0 | PREDICTED: low molecular weight phosphotyrosine protein phosphatase-like [Mus musculus] | 18  |
| 1704.1 | GI:33563252  | Fga       | NP_034326.1    | <u>1</u> | #DIV/O! | 0 | 0 | 0 | 0 | fibrinogen, alpha polypeptide isoform 2 precursor [Mus musculus]                        | 61  |
| 1719.1 | GI:294979177 | Arpp21    | NP_001171094.1 | <u>1</u> | #DIV/O! | 0 | 0 | 0 | 0 | cAMP-regulated phosphoprotein 21 isoform 7 [Mus musculus]                               | 28  |
| 1720.1 | GI:291327533 | Celf4     | NP_001167545.1 | <u>1</u> | #DIV/O! | 0 | 0 | 0 | 0 | CUGBP Elav-like family member 4 isoform F [Mus musculus]                                | 49  |
| 1727.1 | GI:257471036 | Rnf14     | NP_001158094.1 | <u>1</u> | #DIV/O! | 0 | 0 | 0 | 0 | E3 ubiquitin-protein ligase RNF14 isoform b [Mus musculus]                              | 41  |
| 1736.1 | GI:254028246 | Gjc2      | NP_780661.2    | <u>1</u> | #DIV/O! | 0 | 0 | 0 | 0 | gap junction gamma-2 protein [Mus musculus]                                             | 47  |
| 1743.1 | GI:226062635 | Rangap1   | NP_035371.4    | <u>1</u> | #DIV/O! | 0 | 0 | 0 | 0 | ran GTPase-activating protein 1 [Mus musculus]                                          | 63  |
| 1754.1 | GI:165905585 | Lima1     | NP_001107017.1 | <u>1</u> | #DIV/O! | 0 | 0 | 0 | 0 | LIM domain and actin-binding protein 1 isoform a [Mus musculus]                         | 84  |
| 1757.1 | GI:156627586 | Gm2663    | NP_001096130.1 | <u>1</u> | #DIV/O! | 0 | 0 | 0 | 0 | trypsinogen 4 precursor [Mus musculus]                                                  | 27  |
| 1759.1 | GI:148228529 | Hic1      | NP_001091673.1 | <u>1</u> | #DIV/O! | 0 | 0 | 0 | 0 | hypermethylated in cancer 1 protein isoform 2 [Mus musculus]                            | 77  |

TABLE S7 GO analysis-Z-score of proteins identified in ZC3H14 mass spectrometry.

| Ontology-ID | Ontology Name           | Ontology Type      | No. Changed | No. Measured | No. in Ontology | Percent Changed | Percent Present | Z-score     | Permute P | Adjusted P  | Redundant w Terms | Inverse Redundant                    | Gene Symbols                                                                                                                                                                                                                                                                                                                                                                                                                                                                                            |
|-------------|-------------------------|--------------------|-------------|--------------|-----------------|-----------------|-----------------|-------------|-----------|-------------|-------------------|--------------------------------------|---------------------------------------------------------------------------------------------------------------------------------------------------------------------------------------------------------------------------------------------------------------------------------------------------------------------------------------------------------------------------------------------------------------------------------------------------------------------------------------------------------|
| GO:0006397  | mRNA processing         | biological process | 46          | 83           | 290             | 55.42168675     | 28.62068966     | 12.87656871 | 0         | 0.041184932 |                   |                                      | Adar Beas2 Cdc40 Cdc5l Cpsf6 Cpsf7 Eftud2 Eif4a3 Fip111 Khdrbs3 Magoh Ncbp1 Ncbp2 Pabpn1 Phf5a Pnn Prpf19 Prpf38b Prpf39 Prpf40a Prpf4b Prpf6 Prpf8 Puf60 Rbfox1 Rbm22 Rbm25 Sf3a1 Sf3a3 Sf3b1 Sf3b2 Snrnp40 Snrnp70 Snrpa1 Snw1 Srrm1 Srrm2 Srsf1 Srsf10 Sugp2 Thoc1 Thoc2 Thoc3 Thoc5 Thoc6 U2af2                                                                                                                                                                                                     |
| GO:0008380  | RNA splicing            | biological process | 40          | 68           | 221             | 58.82352941     | 30.76923077     | 12.48134119 | 0         | 0.041184932 |                   |                                      | Beas2 Cdc40 Cdc5l Eftud2 Eif4a3 Magoh Ncbp1 Ncbp2 Phf5a Pnn Prpf19 Prpf38b Prpf39 Prpf40a Prpf4b Prpf6 Prpf8 Puf60 Rbfox1 Rbm22 Rbm25 Sf3a1 Sf3a3 Sf3b1 Snrnp200 Snrnp40 Snrnp70 Snrpa1 Snw1 Srrm1 Srrm2 Srsf1 Srsf10 Sugp2 Thoc1 Thoc2 Thoc3 Thoc5 Thoc6 U2af2                                                                                                                                                                                                                                         |
| GO:0005681  | spliceosomal complex    | cellular component | 27          | 46           | 143             | 58.69565217     | 32.16783217     | 10.14501741 | 0         | 0.041184932 | nucleus           |                                      | Beas2 Cdc40 Cdc5l Eftud2 Eif4a3 Magoh Phf5a Pnn Prpf19 Prpf38b Prpf4b Prpf6 Prpf8 Rbm22 Sf3a1 Sf3a3 Sf3b1 Sf3b2 Snrnp200 Snrnp40 Snrnp70 Snrpa1 Snw1 Srrm1 Srrm2 Srsf1 U2af2                                                                                                                                                                                                                                                                                                                            |
| GO:0016607  | nuclear speckle         | cellular component | 20          | 34           | 127             | 58.82352941     | 26.77165354     | 8.702906271 | 0         | 0.041184932 | nucleus           |                                      | Cdc5l Eftud2 Eif4a3 Fyttl1 Magoh Phf5a Pip5k1a Pnn Ppig Prpf19 Prpf40a Prpf8 Rbm25 Srrm1 Srrm2 Srsf1 Srsf10 Thoc1 U2af2 Zc3h14                                                                                                                                                                                                                                                                                                                                                                          |
| GO:0003676  | nucleic acid binding    | molecular function | 56          | 201          | 3318            | 27.86069652     | 6.057866184     | 7.830717583 | 0         | 0.041184932 |                   |                                      | Acin1 Adar Cdc5l Cirbp Cpsf6 Cpsf7 Csde1 Eftud2 Eif4a3 Eif4e2 Elavl3 Elp3 Fip111 Fyttl1 Hmbox1 Ilf3 Khdrbs1 Khdrbs3 Magoh Ncbp2 Pabpn1 Phf5a Pnn Prpf19 Prpf8 Ptrf Puf60 Rbfox1 Rbm15 Rbm22 Rbm25 Rpa1 Safb Sf3a1 Sf3a3 Sf3b2 Snrnp200 Snrnp70 Snrpa1 Srrm1 Srsf1 Srsf10 Srsf4 Srsf5 Srsf6 Sugp2 Thoc1 Thoc2 Thoc3 Thoc5 Thoc6 Top3b U2af2 Zc3h14 Zfp326 Zfr                                                                                                                                            |
| GO:0006405  | RNA export from nucleus | biological process | 11          | 15           | 36              | 73.33333333     | 41.66666667     | 7.499809408 | 0         | 0.041184932 |                   |                                      | Fyttl1 Ncbp1 Ncbp2 Pabpn1 Srsf10 Thoc1 Thoc2 Thoc3 Thoc5 Thoc6 Tsc1                                                                                                                                                                                                                                                                                                                                                                                                                                     |
| GO:0005634  | nucleus                 | cellular component | 79          | 409          | 5232            | 19.31540342     | 7.817278287     | 5.900780052 | 0         | 0.041184932 |                   | nuclear speckle spliceosomal complex | Acin1 Adar Beas2 Cdc40 Cdc5l Cirbp Cpsf6 Cpsf7 Dap3 Eftud2 Eif4a3 Elp3 Fibp Fip111 Flna Fyttl1 Golga3 Hmbox1 Hsbp1 Ilf3 Irf2bp1 Khdrbs1 Khdrbs3 Kif1a Magoh Ncbp1 Ncbp2 Pabpn1 Phf5a Pip5k1a Pnn Ppig Prpf19 Prpf38b Prpf39 Prpf40a Prpf4b Prpf6 Prpf8 Ptrf Puf60 Ranbp2 Rbfox1 Rbm15 Rbm22 Rbm25 Rpa1 Safb Sap18 Sf3a1 Sf3a3 Sf3b1 Sf3b2 Smu1 Snrnp200 Snrnp40 Snrnp70 Snrpa1 Snw1 Srrm1 Srrm2 Srsf1 Srsf10 Srsf5 Srsf6 Sugp2 Syne1 Thoc1 Thoc2 Thoc3 Thoc5 Tkt Tsc2 U2af2 Uba2 Wwp2 Zc3h14 Zfp326 Zfr |

## SUPPLEMENTAL REFERENCES

1. **Chang J, Schwer B, Shuman S.** 2010. Mutational analyses of trimethylguanosine synthase (Tgs1) and Mud2: proteins implicated in pre-mRNA splicing. *RNA* **16**:1018-1031.
2. **Sikorski RS, Hieter P.** 1989. A system of shuttle vectors and yeast host strains designed for efficient manipulation of DNA in *Saccharomyces cerevisiae*. *Genetics* **122**:19-27.
3. **Green DM, Marfatia KA, Crafton EB, Zhang X, Cheng X, Corbett AH.** 2002. Nab2p is required for poly(A) RNA export in *Saccharomyces cerevisiae* and is regulated by arginine methylation via Hmt1p. *J Biol Chem* **277**:7752-7760.
4. **Marfatia KA, Crafton EB, Green DM, Corbett AH.** 2003. Domain analysis of the *Saccharomyces cerevisiae* heterogeneous nuclear ribonucleoprotein, Nab2p. Dissecting the requirements for Nab2p-facilitated poly(A) RNA export. *J Biol Chem* **278**:6731-6740.
5. **Tran EJ, Zhou Y, Corbett AH, Wentz SR.** 2007. The DEAD-box protein Dbp5 controls mRNA export by triggering specific RNA:protein remodeling events. *Mol Cell* **28**:850-859.
6. **Kelly SM, Leung SW, Apponi LH, Bramley AM, Tran EJ, Chekanova JA, Wentz SR, Corbett AH.** 2010. Recognition of polyadenosine RNA by the zinc finger domain of nuclear poly(A) RNA-binding protein 2 (Nab2) is required for correct mRNA 3'-end formation. *J Biol Chem* **285**:26022-26032.
7. **Thomas BJ, Rothstein R.** 1989. Elevated recombination rates in transcriptionally active DNA. *Cell* **56**:619-630.
8. **Brachmann CB, Davies A, Cost GJ, Caputo E, Li J, Hieter P, Boeke JD.** 1998. Designer deletion strains derived from *Saccharomyces cerevisiae* S288C: a useful set of strains and plasmids for PCR-mediated gene disruption and other applications. *Yeast* **14**:115-132.
9. **Daniel JA, Yoo J, Bettinger BT, Amberg DC, Burke DJ.** 2006. Eliminating gene conversion improves high-throughput genetics in *Saccharomyces cerevisiae*. *Genetics* **172**:709-711.
10. **Pleiss JA, Whitworth GB, Bergkessel M, Guthrie C.** 2007. Transcript specificity in yeast pre-mRNA splicing revealed by mutations in core spliceosomal components. *PLoS Biol* **5**:e90.
